# Supplementary material for: A general mechanistic map of organocatalytic hydroboration of alkynes: polarity controlled switchable selective pathways
Source: Royal Society of Chemistry journal article supplement (doi:10.1039/d4qo00702f), 2024-01-01
Supplement: d4qo00702f1.pdf [file d4qo00702f1.pdf]

---

## SUPPORTING INFORMATION FOR

### **A general mechanistic map of organocatalytic hydroboration of alkynes: Polarity controlled switchable selective pathways**

Chunhui Liu,<sup>a\*</sup> Peilin Han,<sup>a</sup> Xiaoxiao Hou,<sup>b</sup> Suxiang Ge,<sup>a</sup> Donghui Wei<sup>b\*</sup>

<sup>a</sup>*Key Laboratory of Micro-Nano Materials for Energy Storage and Conversion of Henan Province, Institute of Surface Micro and Nano Materials, College of Chemical and Materials Engineering, Xuchang University, Xuchang, Henan Province, 461000, P. R. China.*

<sup>b</sup>*College of Chemistry, Zhengzhou University, Zhengzhou, Henan Province, 450001, P. R. China.*

---

## Contents

|                                                                                                                                                                                                                                  |          |
|----------------------------------------------------------------------------------------------------------------------------------------------------------------------------------------------------------------------------------|----------|
| Part 1: Computational details .....                                                                                                                                                                                              | S3-4     |
| Part 2: Test results of the different computational methods .....                                                                                                                                                                | S5       |
| Part 3: The one-step reaction processes of HBpin with ynamide in the presence of $\text{PBu}_3$ .....                                                                                                                            | S6       |
| Part 4: The scan results of the barrier-less process.....                                                                                                                                                                        | S7       |
| Part 5: The 1,2-hydride transfer assisted by HBpin and directly 1,2-proton transfer processes of $\text{PBu}_3$ -catalyzed hydroboration of ynamide.....                                                                         | S8       |
| Part 6: The $\text{H}_2\text{O}$ -assisted 1,2-hydride transfer process of $\text{PBu}_3$ -catalyzed hydroboration of ynamide .....                                                                                              | S9       |
| Part 7: The $2\text{H}_2\text{O}$ -assisted 1,2-proton transfer process leading to <i>E</i> -isomer of $\text{PBu}_3$ -catalyzed hydroboration of ynamide .....                                                                  | S10      |
| Part 8: The 1,3-hydride transfer process assisted by HBpin of $\text{PBu}_3$ -catalyzed hydroboration of ynamide .....                                                                                                           | S11      |
| Part 9: The 1,2-borotopic transfer leading to <i>Z</i> -isomer of $\text{PBu}_3$ -catalyzed hydroboration of propiolonitrile .....                                                                                               | S12      |
| Part 10: The one-step reaction processes of HBpin with propiolonitrile in the presence of $\text{PBu}_3$ .....                                                                                                                   | S13      |
| Part 11: The 1,4-conjugate addition processes of HBpin with propiolonitrile in the presence of $\text{PBu}_3$ .....                                                                                                              | S14      |
| Part 12: The energies of all the optimized structures .....                                                                                                                                                                      | S15-18   |
| Part 13: The geometries ( $\text{\AA}$ ) for all the optimized compounds and transition states of $\text{PBu}_3$ -catalyzed hydroboration of ynamide at M06-2X/6-31G(d,p)/SMD <sub>toluene</sub> level.....                      | S19-155  |
| Part 14: The geometries ( $\text{\AA}$ ) for all the optimized compounds and transition states of $\text{PBu}_3$ -catalyzed hydroboration of propiolonitrile at the M06-2X/6-31G(d,p)/SMD <sub>dichloromethane</sub> level ..... | S156-256 |
| Part 15: References.....                                                                                                                                                                                                         | S257-258 |

---

## Part 1: Computational details

All calculations reported in this paper were performed with the Gaussian 16 suite of programs.<sup>1</sup> The M06-2X<sup>2</sup> functional was used for geometry optimization using the SMD<sup>3</sup> solvation model (solvent = toluene for case study A and solvent = dichloromethane for case study B) with the standard 6-31G(d,p) basis set. Harmonic vibrational frequency calculations of all of the stationary points were performed to confirm whether they are local minima or transition structures and to derive the thermochemical corrections for the enthalpies and free energies. The transition states were confirmed by intrinsic reaction coordinate calculations. The single-point energies were calculated at the M06-2X/6-311+G(d,p) level using the SMD solvation model (solvent = toluene for case study A and solvent = dichloromethane for case study B). The calculated three-dimensional stereoscopic structures were prepared using the CYLview.<sup>4</sup>

In addition, the extent of enantioselectivity, in terms of enantiomeric excess (ee), was also calculated by using the Boltzmann distribution of stereo-selective transition states with the following equation:

$$\frac{[R]}{[S]} = \frac{\exp(-\Delta G_{[R]}^\ddagger/RT)}{\exp(-\Delta G_{[S]}^\ddagger/RT)} = \exp(-\Delta\Delta G^\ddagger/RT) \quad (1)$$

$$ee = \frac{[R]-[S]}{[R]+[S]} \times 100\% = \frac{\frac{[R]}{[S]}-1}{\frac{[R]}{[S]}+1} \times 100\% \quad (2)$$

where  $\Delta G^\ddagger$  is the Gibbs free energy barrier of the competing stereo-selective transition states and  $\Delta\Delta G^\ddagger$  is the Gibbs free energy barrier difference between the two stereo-selective transition states.

For analyzing the local nucleophilicity and electrophilicity, we have also performed the Parr function analysis<sup>5</sup> at the M06-2X/6-31G(d,p)/SMD level (solvent = toluene for case study A and solvent = dichloromethane for case study B). Pioneered by Domingo and coworkers, the nucleophilic ( $P_k^-$ ) and electrophilic ( $P_k^+$ ) Parr functions which allow for the characterization of the nucleophilic and electrophilic sites of a molecule, can be obtained through the analysis of Mulliken atomic spin density (ASD) of the corresponding radical cations (RC) or anions (RA) of the studies molecules, separately. According to Domingo's definition, the Parr functions can be expressed by the following equations:

$$P_k^- = \rho_s^{rc}(r) \text{ for the electrophilic attacks} \quad (3)$$

$$P_k^+ = \rho_s^{ra}(r) \text{ for the nucleophilic attacks} \quad (4)$$

Where  $\rho_s^{rc}(r)$  is the ASD of the radical cation and  $\rho_s^{ra}(r)$  is the ASD of the radical anion. Each ASD condensed at the different atoms of the radical cation and radical anion provides the local nucleophilic  $P_k^-$  and electrophilic  $P_k^+$  Parr functions of the neutral system, respectively.

---

For the global reactivity index (GRI) analysis, the relevant parameters of GRI, i.e., global electrophilicity index  $\omega$ ,<sup>6</sup> electronic chemical potential  $\mu$ , chemical hardness  $\eta$ , one-electron energies of the frontier molecular orbital HOMO ( $E_L$ ) and LUMO ( $E_H$ ). The HOMO energies obtained within the Kohn–Sham scheme,<sup>7</sup> global nucleophilicity index  $N^8$  was generally utilized to judge the nucleophilicity character. In addition, according to Domingo’s definition, the local electrophilicity ( $\omega_k$ ) and local nucleophilicity ( $N_k$ ) index can be expressed by the following equations:

$$N_k = N \times P_k^- \quad (5)$$

$$\omega_k = \omega \times P_k^+ \quad (6)$$

To ensure that the selected stereoselective conformations with the lowest energies, we employed CREST (version 2.12)<sup>9</sup> in combination with the xTB package (version 6.4.0)<sup>10</sup> for the samplings of low-energy conformations of the transition states at the GFN2-xTB level with toluene (case study A) and dichloromethane (case study B) implicit solvation,<sup>11</sup> atoms in the forming/cleaving bonds were constrained by applying a force constant of 0.5 Hartree/Bohr. An energy window of 6.0 kcal/mol and an RMSD threshold of 0.5 Å were used. Fully relaxed TS optimizations were performed for the low-lying TSs as well as for those TSs with remarkably different structural features.

---

## Part 2: Test results of the different computational methods

We have compared the relative Gibbs free energy barriers ( $\Delta\Delta G^\ddagger$ ) between **M3** and **TS2R**, which are computed by the Gibbs free energy corrections at the M062x/6-31G(d,p)//SMD<sub>toluene</sub> plus the refined single-point energies at the M062x/6-311+G(d,p)//SMD<sub>toluene</sub> (denoted as L1); which are computed by the Gibbs free energy corrections at the B3LYP-D3(BJ)<sup>12</sup>/6-31G(d,p)//SMD<sub>toluene</sub> plus the refined single-point energies at the B3LYP-D3(BJ)/6-311+G(d,p)//SMD<sub>toluene</sub> (denoted as L2), and which are computed by the Gibbs free energy corrections at the  $\omega$ B97X-D<sup>13</sup>/6-31G(d,p)//SMD<sub>toluene</sub> plus the refined single-point energies at the  $\omega$ B97X-D/6-311+G(d,p)//SMD<sub>toluene</sub> (denoted as L3) levels, respectively. As shown in Table S1, there are small energy barrier differences between **M3** and **TS2R**, indicating the selected method should be proper and reliable in this kind of reaction system.

**Table S1** Comparison of relative Gibbs free energy barrier differences ( $\Delta\Delta G^\ddagger$ ) between **M3** and **TS2R** calculated by using the different levels (L1-3) (unit: kcal/mol).

|           | $\Delta\Delta G^\ddagger$ |
|-----------|---------------------------|
| <b>L1</b> | <b>12.5</b>               |
| <b>L2</b> | <b>10.8</b>               |
| <b>L3</b> | <b>11.7</b>               |

**Part 3: The one-step reaction processes of HBpin with ynamide in the presence of PBU<sub>3</sub>**

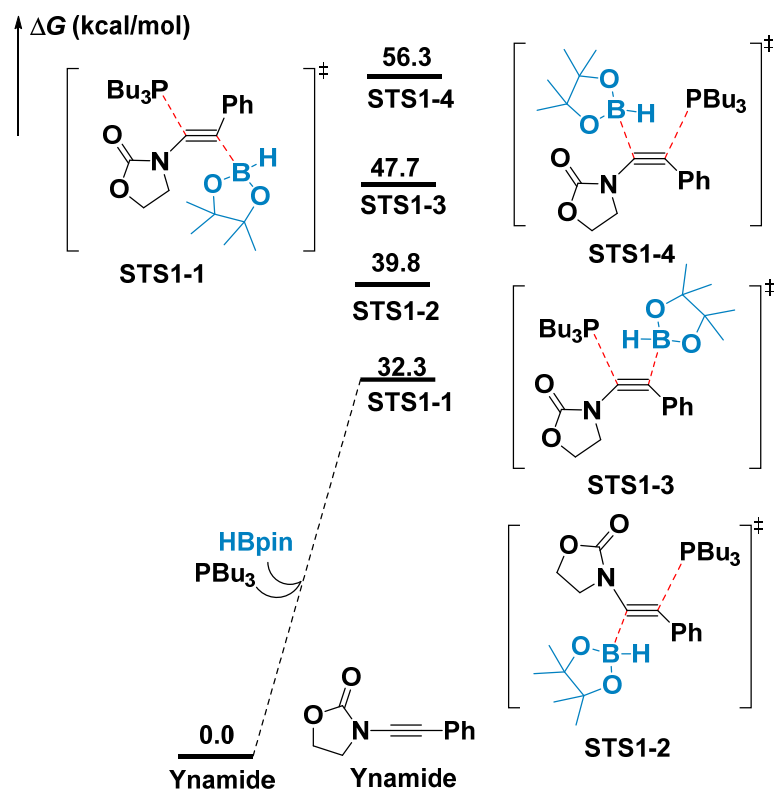

**Fig. S1** Free energy profiles of the one-step reaction processes of HBpin with ynamide in the presence of PBU<sub>3</sub> at the M06-2X/6-311+G(d,p)/SMD<sub>toluene</sub>//M06-2X/6-31G(d,p)/SMD<sub>toluene</sub> level.

## Part 4: The scan results of the barrier-less processes

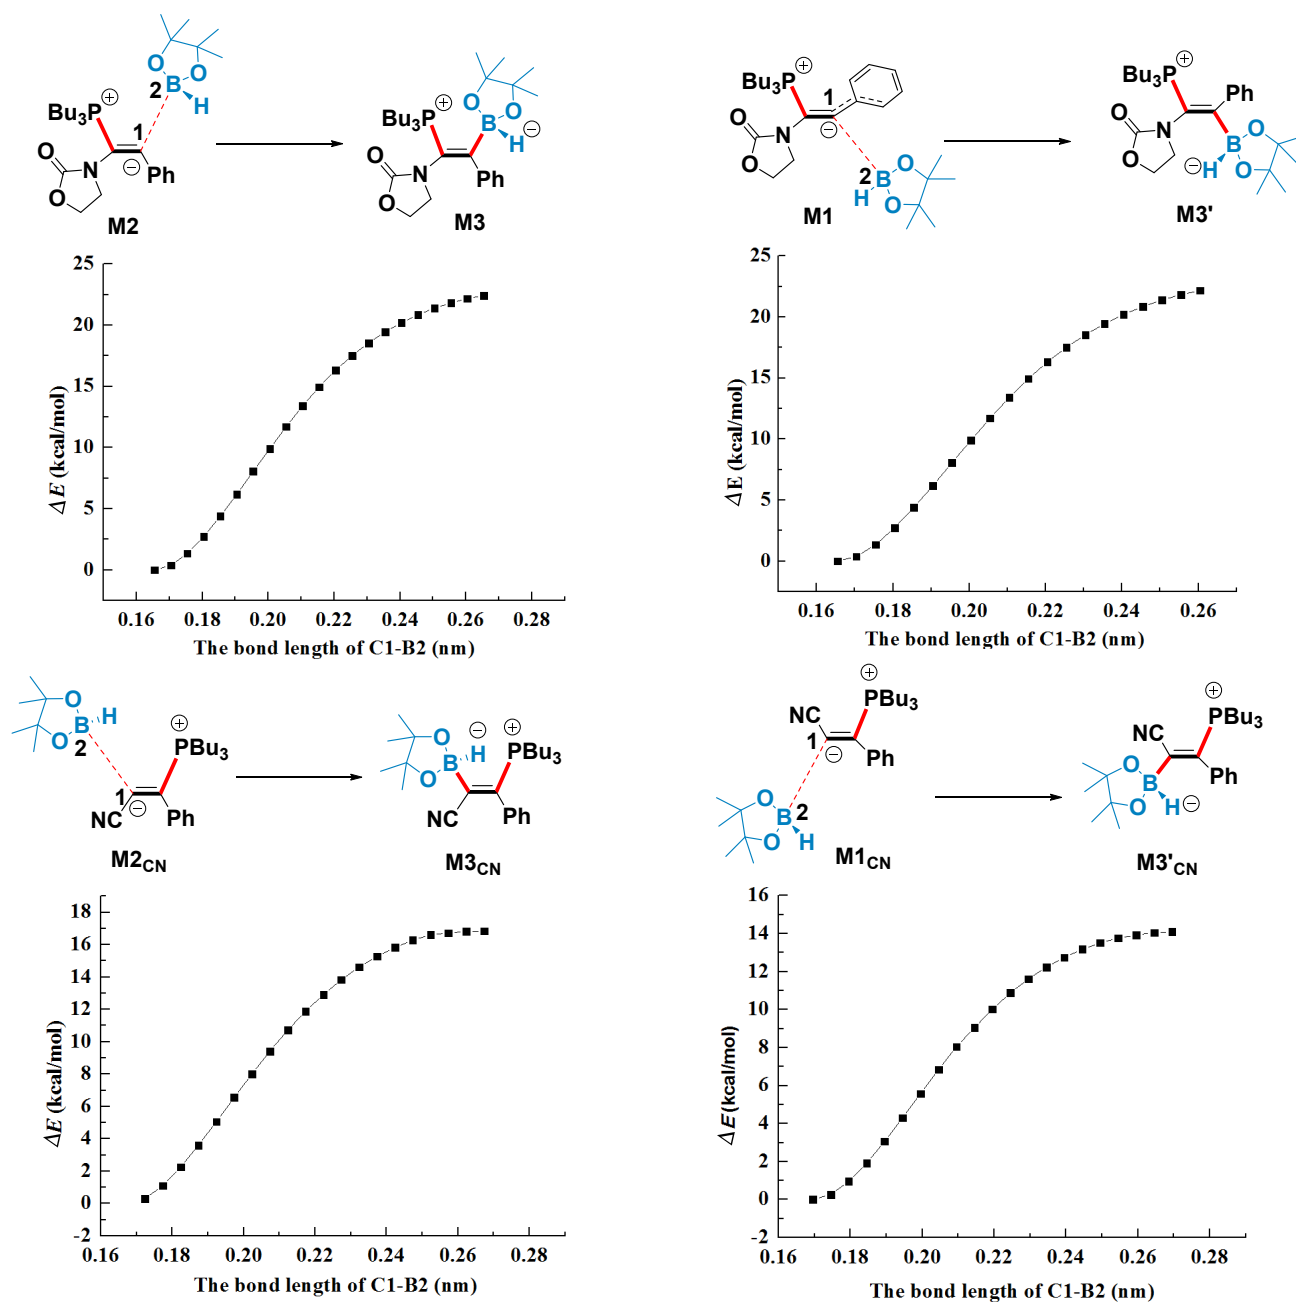

**Fig. S2** The scan profiles from **M2** and **M1** to **M3** and **M3'** at the M06-2X/6-31G(d,p)/SMD<sub>toluene</sub> level, and from **M2<sub>CN</sub>** and **M1<sub>CN</sub>** to **M3<sub>CN</sub>** and **M3'<sub>CN</sub>** at the M06-2X/6-31G(d,p)/SMD<sub>dichloromethane</sub> level.

**Part 5: The 1,2-hydride transfer assisted by HBpin and directly 1,2-proton transfer processes of PBU<sub>3</sub>-catalyzed hydroboration of ynamide**

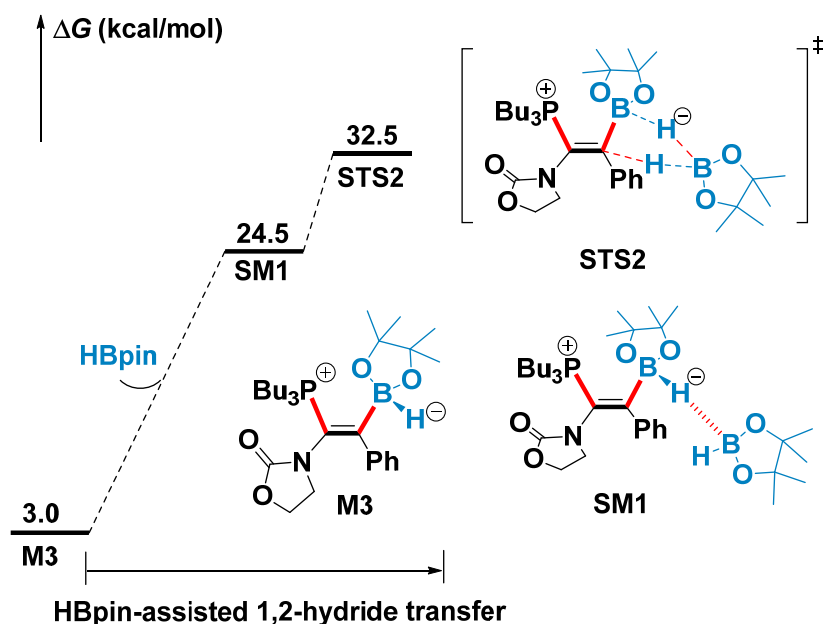

**Fig. S3** Free energy profiles of 1,2-hydride transfer process assisted by HBpin of PBU<sub>3</sub>-catalyzed hydroboration of ynamide at the M06-2X/6-311+G(d,p)/SMD<sub>toluene</sub>//M06-2X/6-31G(d,p)/SMD<sub>toluene</sub> level.

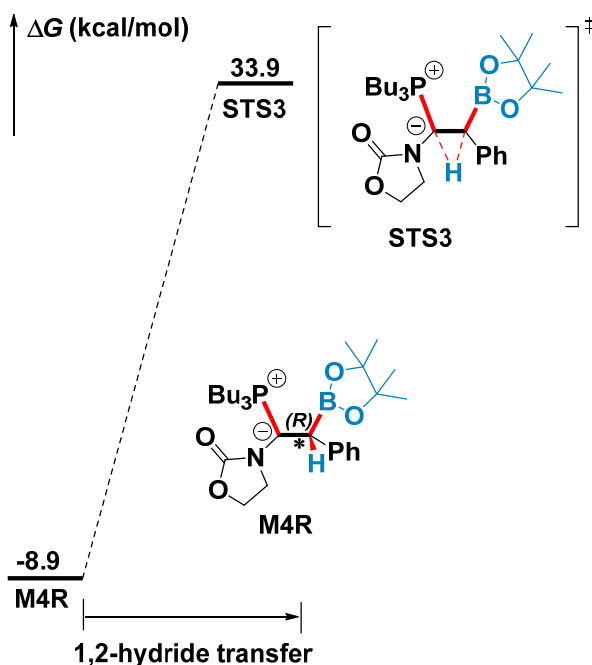

**Fig. S4** Free energy profiles of directly 1,2-proton transfer process of PBU<sub>3</sub>-catalyzed hydroboration of ynamide at the M06-2X/6-311+G(d,p)/SMD<sub>toluene</sub>//M06-2X/6-31G(d,p)/SMD<sub>toluene</sub> level.



## Part 6: The H<sub>2</sub>O-assisted 1,2-hydride transfer process of PBu<sub>3</sub>-catalyzed hydroboration of ynamide

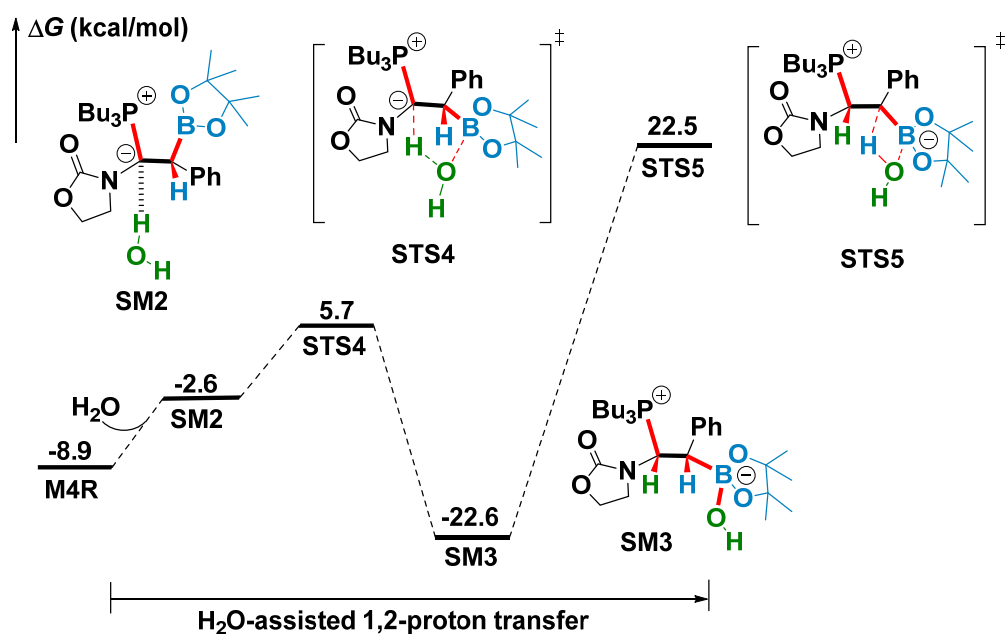

**Fig. S5** Free energy profiles of H<sub>2</sub>O-assisted 1,2-hydride transfer process leading to Z-isomer of PBu<sub>3</sub>-catalyzed hydroboration of ynamide at the M06-2X/6-311+G(d,p)/SMD<sub>toluene</sub>//M06-2X/6-31G(d,p)/SMD<sub>toluene</sub> level.

**Part 7: The 2H<sub>2</sub>O-assisted 1,2-proton transfer process leading to *E*-isomer of PBu<sub>3</sub>-catalyzed hydroboration of ynamide**

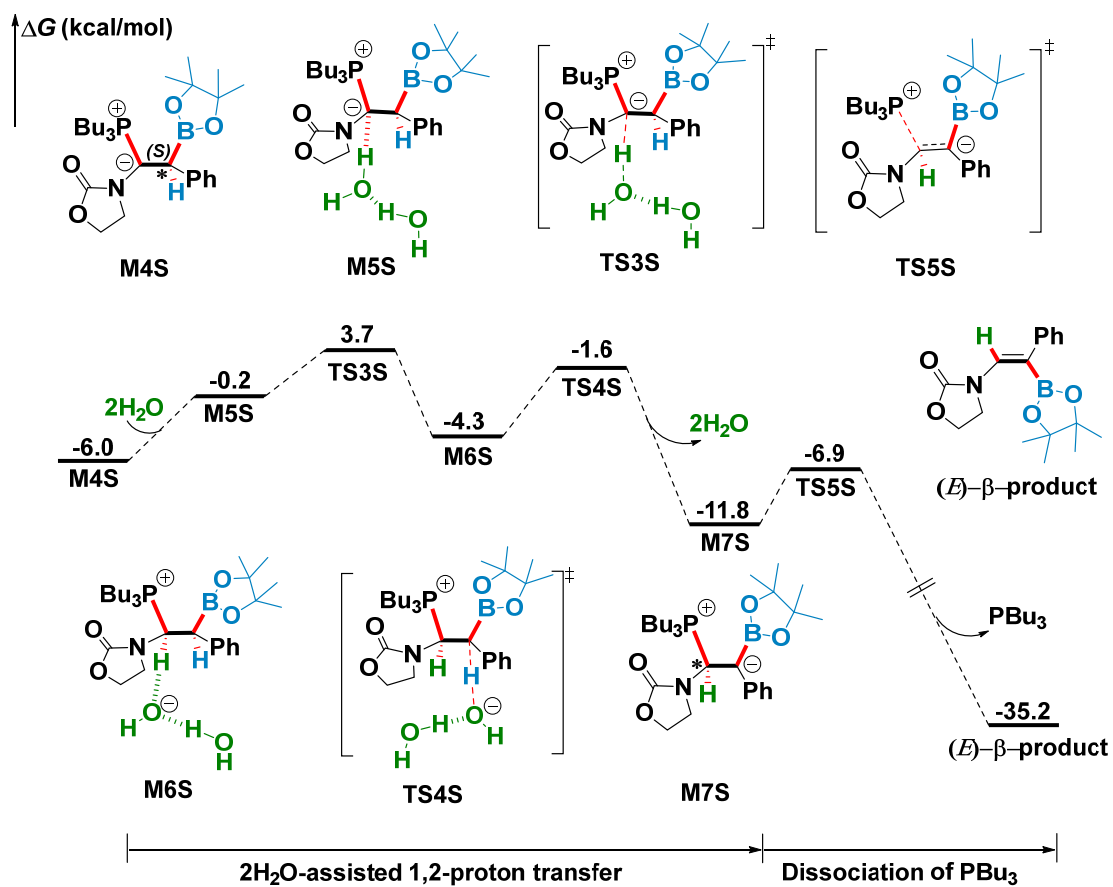

**Fig. S6** Free energy profiles of 2H<sub>2</sub>O-assisted 1,2-proton transfer process leading to *E*-isomer of PBu<sub>3</sub>-catalyzed hydroboration of ynamide at the M06-2X/6-311+G(d,p)/SMD<sub>toluene</sub>//M06-2X/6-31G(d,p)/SMD<sub>toluene</sub> level.

## Part 8: The 1,3-hydride transfer process assisted by HBpin of PBU<sub>3</sub>-catalyzed hydroboration of ynamide

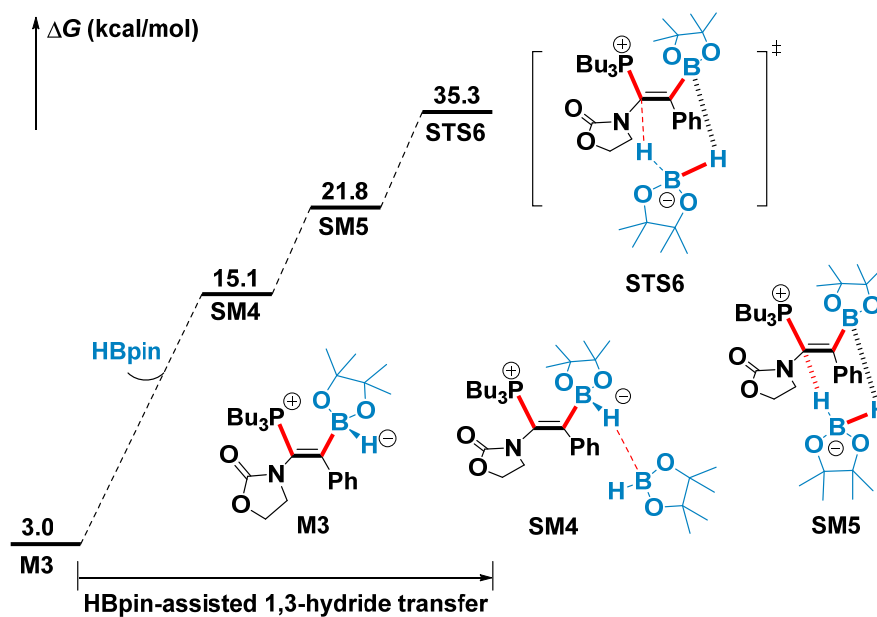

**Fig. S7** Free energy profiles of 1,3-hydride transfer process assisted by HBpin of PBU<sub>3</sub>-catalyzed hydroboration of ynamide at the M06-2X/6-311+G(d,p)/SMD<sub>toluene</sub>//M06-2X/6-31G(d,p)/SMD<sub>toluene</sub> level.

**Part 9: The 1,2-borotopic transfer leading to *Z*-isomer of PBU<sub>3</sub>-catalyzed hydroboration of propionitrile**

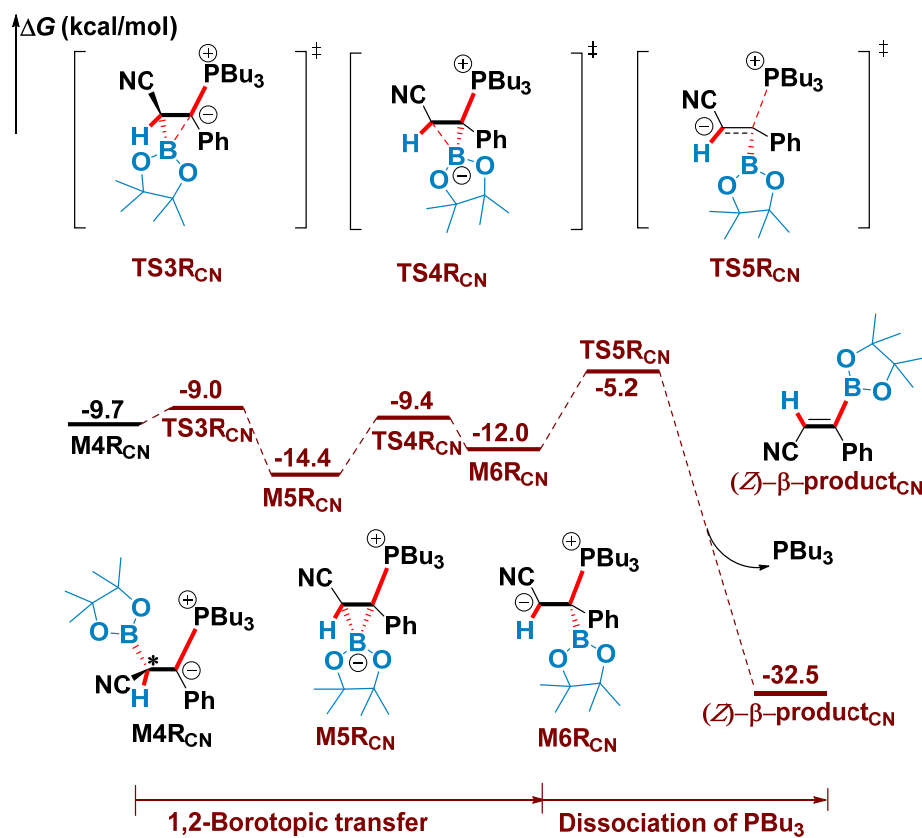

**Fig. S8** Free energy profiles of 1,2-borotopic transfer process leading to *Z*-isomer of PBU<sub>3</sub>-catalyzed hydroboration of propionitrile at the M06-2X/6-311+G(d,p)/SMD<sub>dichloromethane</sub>//M06-2X/6-31G(d,p)/SMD<sub>dichloromethane</sub> level.

**Part 10: The one-step reaction processes of HBpin with propiolonitrile in the presence of PBU<sub>3</sub>**

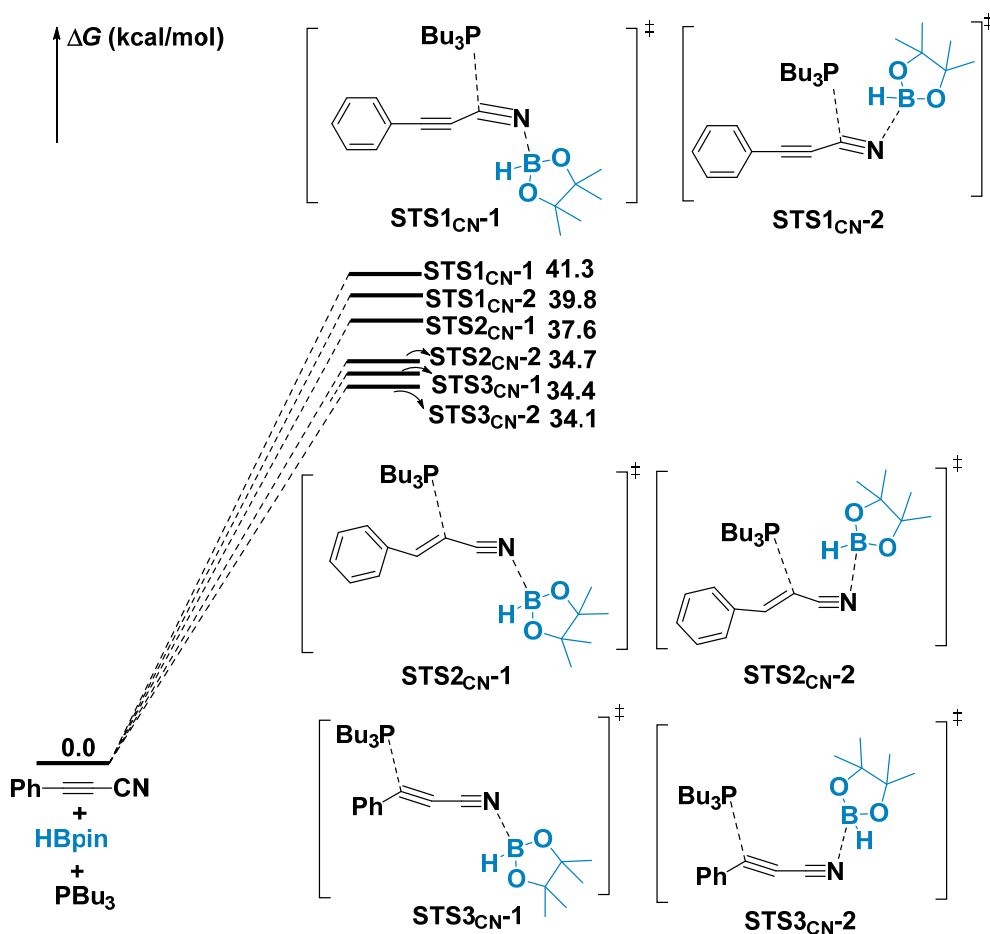

**Fig. S9** Free energy profiles of the one-step reaction processes of HBpin with propiolonitrile in the presence of PBU<sub>3</sub> at the M06-2X/6-311+G(d,p)/SMD<sub>dichloromethane</sub>//M06-2X/6-31G(d,p)/SMD<sub>dichloromethane</sub> level.

**Part 11: The 1,4-conjugate addition processes of HBpin with propiolonitrile in the presence of PBU<sub>3</sub>**

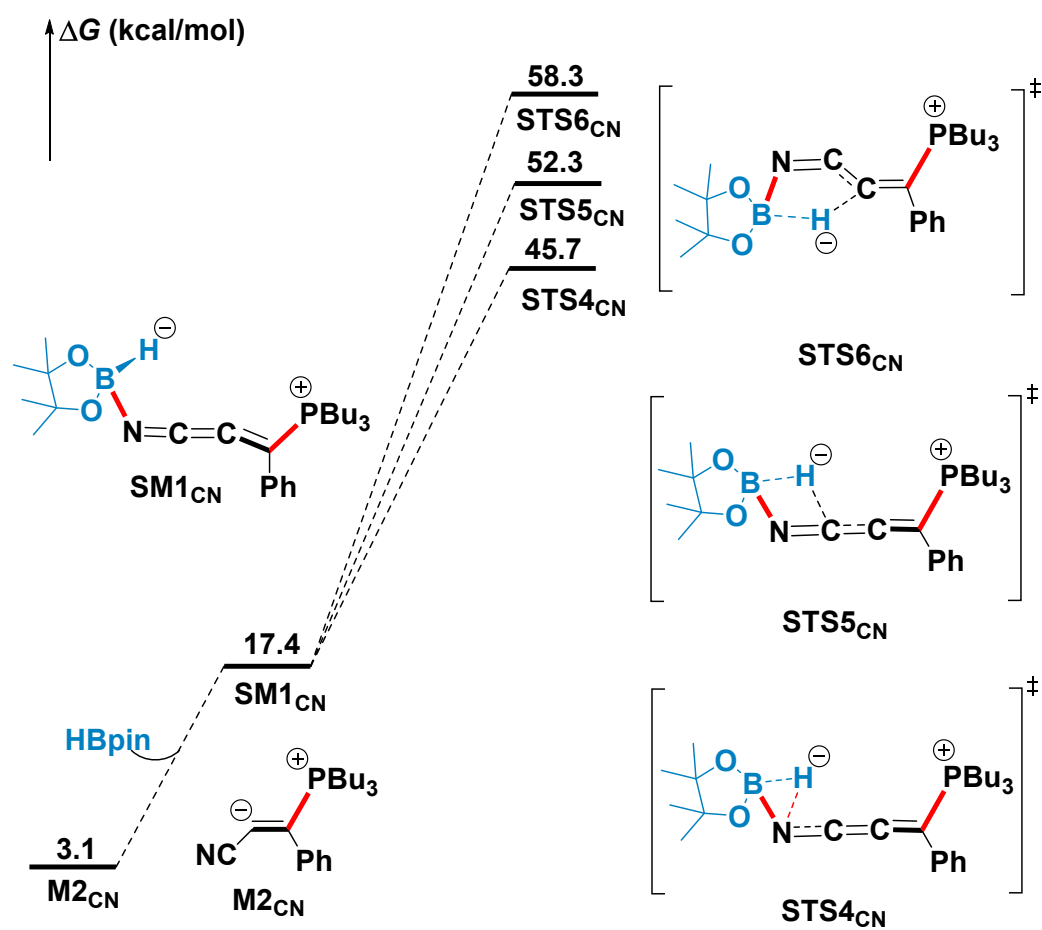

**Fig. S10** Free energy profiles of 1,4-conjugate addition processes of PBU<sub>3</sub>-catalyzed hydroboration of propiolonitrile at the M06-2X/6-311+G(d,p)/SMD<sub>dichloromethane</sub>//M06-2X/6-31G(d,p)/SMD<sub>dichloromethane</sub> level.

---

## Part 12: The energies of all the optimized structures

**Table S2** The single-point energies ( $E$ ), Gibbs free energy corrections (GFEC), and Gibbs free energies (GFE) ( $=E+GFEC$ ) of the stationary points involved in the  $\text{PBU}_3$ -catalyzed hydroboration of ynamide. (Unit: a.u)

| SP                    | GFEC<br>(M06-2X/6-31G(d,<br>p)/SMD <sub>toluene</sub> ) | $E$<br>(M06-2X/6-311+G(d<br>,p)/SMD <sub>toluene</sub> ) | GFE          | Number of<br>imaginary<br>frequencies |
|-----------------------|---------------------------------------------------------|----------------------------------------------------------|--------------|---------------------------------------|
| Ynamide               | 0.141102                                                | -629.668188                                              | -629.527086  | 0                                     |
| $\text{PBU}_3$        | 0.324634                                                | -814.786738                                              | -814.462104  | 0                                     |
| HBpin                 | 0.160138                                                | -411.813457                                              | -411.653319  | 0                                     |
| $\text{H}_2\text{O}$  | 0.003282                                                | -76.425306                                               | -76.422024   | 0                                     |
| $2\text{H}_2\text{O}$ | 0.020486                                                | -152.85925                                               | -152.838764  | 0                                     |
| TS1                   | 0.48747                                                 | -1444.438375                                             | -1443.950905 | 1                                     |
| M1                    | 0.493283                                                | -1444.458211                                             | -1443.964928 | 0                                     |
| M2                    | 0.490555                                                | -1444.45827                                              | -1443.967715 | 0                                     |
| TS1'                  | 0.487995                                                | -1444.432305                                             | -1443.94431  | 1                                     |
| TS1''                 | 0.48946                                                 | -1444.419903                                             | -1443.930443 | 1                                     |
| M3                    | 0.677531                                                | -1856.315234                                             | -1855.637703 | 0                                     |
| TS2R                  | 0.674025                                                | -1856.291817                                             | -1855.617792 | 1                                     |
| M4R                   | 0.677371                                                | -1856.334057                                             | -1855.656686 | 0                                     |
| TS2S                  | 0.671692                                                | -1856.286687                                             | -1855.614995 | 1                                     |
| M4S                   | 0.679541                                                | -1856.331561                                             | -1855.65202  | 0                                     |
| M3'                   | 0.679773                                                | -1856.309277                                             | -1855.629504 | 0                                     |
| TS2R'                 | 0.673795                                                | -1856.29005                                              | -1855.616255 | 1                                     |
| TS2S'                 | 0.673353                                                | -1856.28305                                              | -1855.609697 | 1                                     |
| M5R                   | 0.723991                                                | -2009.210596                                             | -2008.486605 | 0                                     |
| TS3R                  | 0.72158                                                 | -2009.202671                                             | -2008.481091 | 1                                     |
| M6R                   | 0.723766                                                | -2009.205418                                             | -2008.481652 | 0                                     |

|                        |          |              |              |   |
|------------------------|----------|--------------|--------------|---|
| TS4R                   | 0.722298 | -2009.194048 | -2008.47175  | 1 |
| M7R                    | 0.683129 | -1856.34241  | -1855.659281 | 0 |
| TS5R                   | 0.680424 | -1856.327557 | -1855.647133 | 1 |
| (Z)- $\beta$ -product  | 0.327118 | -1041.568318 | -1041.2412   | 0 |
| M5S                    | 0.723359 | -2009.204903 | -2008.481544 | 0 |
| TS3S                   | 0.720426 | -2009.19578  | -2008.475354 | 1 |
| M6S                    | 0.726522 | -2009.214694 | -2008.488172 | 0 |
| TS4S                   | 0.721175 | -2009.20494  | -2008.483765 | 1 |
| M7S                    | 0.67959  | -1856.340836 | -1855.661246 | 0 |
| TS5S                   | 0.676887 | -1856.330326 | -1855.653439 | 1 |
| (E)- $\beta$ -product  | 0.326964 | -1041.563428 | -1041.236464 | 0 |
| TS6R                   | 0.681416 | -1856.322502 | -1855.641086 | 1 |
| M8R                    | 0.682066 | -1856.327059 | -1855.644993 | 0 |
| TS7R                   | 0.678142 | -1856.309567 | -1855.631425 | 1 |
| M9R                    | 0.679058 | -1856.315298 | -1855.63624  | 0 |
| TS8R                   | 0.677964 | -1856.302123 | -1855.624159 | 1 |
| (Z)- $\alpha$ -product | 0.327472 | -1041.563826 | -1041.236354 | 0 |
| STS1-1                 | 0.668629 | -1856.259643 | -1855.591014 | 1 |
| STS1-2                 | 0.670994 | -1856.250064 | -1855.57907  | 1 |
| STS1-3                 | 0.670168 | -1856.236612 | -1855.566444 | 1 |
| STS1-4                 | 0.672361 | -1856.225093 | -1855.552732 | 1 |
| SM1                    | 0.862368 | -2268.119216 | -2267.256848 | 0 |
| STS2                   | 0.860122 | -2268.104237 | -2267.244115 | 1 |
| STS3                   | 0.674223 | -1856.262775 | -1855.588552 | 1 |
| SM2                    | 0.702184 | -1932.770852 | -1932.068668 | 0 |
| STS4                   | 0.705033 | -1932.760434 | -1932.055401 | 1 |
| SM3                    | 0.707002 | -1932.807477 | -1932.100475 | 0 |
| STS5                   | 0.699416 | -1932.728062 | -1932.028646 | 1 |
| SM4                    | 0.860072 | -2268.131855 | -2267.271783 | 0 |



|      |          |              |              |   |
|------|----------|--------------|--------------|---|
| SM5  | 0.858605 | -2268.119702 | -2267.261097 | 0 |
| STS6 | 0.858071 | -2268.097665 | -2267.239594 | 1 |

**Table S3** The single-point energies (*E*), Gibbs free energy corrections (GFEC), and Gibbs free energies (GFE) (=E+GFEC) of the stationary points involved in the PBU<sub>3</sub>-catalyzed hydroboration of propiolonitrile. (Unit: a.u)

| SP                  | GFEC<br>(M06-2X/6-31G(d,<br>p)/SMDdichloromet<br>hane) | <i>E</i><br>(M06-2X/6-311+G(d,<br>p)/SMDdichlorometha<br>ne) | GFE          | Number of<br>imaginary<br>frequencies |
|---------------------|--------------------------------------------------------|--------------------------------------------------------------|--------------|---------------------------------------|
| Propiolonitrile     | 0.076987                                               | -400.59142                                                   | -400.514433  | 0                                     |
| PBU <sub>3</sub>    | 0.323949                                               | -814.789024                                                  | -814.465075  | 0                                     |
| HBpin               | 0.159589                                               | -411.816099                                                  | -411.65651   | 0                                     |
| 2H <sub>2</sub> O   | 0.020157                                               | -152.864958                                                  | -152.844801  | 0                                     |
| TS1 <sub>CN</sub>   | 0.420215                                               | -1215.368219                                                 | -1214.948004 | 1                                     |
| M1 <sub>CN</sub>    | 0.425798                                               | -1215.39807                                                  | -1214.972272 | 0                                     |
| TS1' <sub>CN</sub>  | 0.421234                                               | -1215.358719                                                 | -1214.937485 | 1                                     |
| M2 <sub>CN</sub>    | 0.425107                                               | -1215.399753                                                 | -1214.974646 | 0                                     |
| M3 <sub>CN</sub>    | 0.60895                                                | -1627.244171                                                 | -1626.635221 | 0                                     |
| M3' <sub>CN</sub>   | 0.608422                                               | -1627.237764                                                 | -1626.629342 | 0                                     |
| TS2 <sub>SCN</sub>  | 0.605747                                               | -1627.215753                                                 | -1626.610006 | 1                                     |
| TS2 <sub>RCN</sub>  | 0.607386                                               | -1627.214805                                                 | -1626.607419 | 1                                     |
| TS2' <sub>SCN</sub> | 0.603355                                               | -1627.211749                                                 | -1626.608394 | 1                                     |
| TS2' <sub>RCN</sub> | 0.603887                                               | -1627.209181                                                 | -1626.605294 | 1                                     |
| M4 <sub>SCN</sub>   | 0.611273                                               | -1627.26266                                                  | -1626.651387 | 0                                     |
| TS3 <sub>SCN</sub>  | 0.610425                                               | -1627.261216                                                 | -1626.650791 | 1                                     |
| M5 <sub>SCN</sub>   | 0.611388                                               | -1627.268831                                                 | -1626.657443 | 0                                     |
| TS4 <sub>SCN</sub>  | 0.611826                                               | -1627.264296                                                 | -1626.65247  | 1                                     |

|                                                     |                 |                     |                     |          |
|-----------------------------------------------------|-----------------|---------------------|---------------------|----------|
| <b>M6<sub>CN</sub></b>                              | <b>0.612051</b> | <b>-1627.267547</b> | <b>-1626.655496</b> | <b>0</b> |
| <b>TS5<sub>CN</sub></b>                             | <b>0.609936</b> | <b>-1627.259456</b> | <b>-1626.64952</b>  | <b>1</b> |
| <b>(E)-<math>\beta</math>-product<sub>CN</sub></b>  | <b>0.261292</b> | <b>-812.482097</b>  | <b>-812.220805</b>  | <b>0</b> |
| <b>M4<sub>CN</sub></b>                              | <b>0.612198</b> | <b>-1627.263749</b> | <b>-1626.651551</b> | <b>0</b> |
| <b>TS3<sub>CN</sub></b>                             | <b>0.612474</b> | <b>-1627.262858</b> | <b>-1626.650384</b> | <b>1</b> |
| <b>M5<sub>CN</sub></b>                              | <b>0.613649</b> | <b>-1627.272625</b> | <b>-1626.658976</b> | <b>0</b> |
| <b>TS4<sub>CN</sub></b>                             | <b>0.61236</b>  | <b>-1627.26333</b>  | <b>-1626.65097</b>  | <b>1</b> |
| <b>M6<sub>CN</sub></b>                              | <b>0.610265</b> | <b>-1627.265446</b> | <b>-1626.655181</b> | <b>0</b> |
| <b>TS5<sub>CN</sub></b>                             | <b>0.608798</b> | <b>-1627.253128</b> | <b>-1626.64433</b>  | <b>1</b> |
| <b>(Z)-<math>\beta</math>-product<sub>CN</sub></b>  | <b>0.260493</b> | <b>-812.483165</b>  | <b>-812.222672</b>  | <b>0</b> |
| <b>M7<sub>CN</sub></b>                              | <b>0.655752</b> | <b>-1780.148722</b> | <b>-1779.49297</b>  | <b>0</b> |
| <b>TS6<sub>CN</sub></b>                             | <b>0.652357</b> | <b>-1780.134987</b> | <b>-1779.48263</b>  | <b>1</b> |
| <b>M8<sub>CN</sub></b>                              | <b>0.655188</b> | <b>-1780.16982</b>  | <b>-1779.514632</b> | <b>0</b> |
| <b>M9<sub>CN</sub></b>                              | <b>0.613315</b> | <b>-1627.294093</b> | <b>-1626.680778</b> | <b>0</b> |
| <b>TS7<sub>CN</sub></b>                             | <b>0.61032</b>  | <b>-1627.270049</b> | <b>-1626.659729</b> | <b>1</b> |
| <b>(E)-<math>\alpha</math>-product<sub>CN</sub></b> | <b>0.261149</b> | <b>-812.484079</b>  | <b>-812.22293</b>   | <b>0</b> |
| <b>STS1<sub>CN</sub>-1</b>                          | <b>0.603261</b> | <b>-1627.173519</b> | <b>-1626.570258</b> | <b>1</b> |
| <b>STS1<sub>CN</sub>-2</b>                          | <b>0.603904</b> | <b>-1627.176575</b> | <b>-1626.572671</b> | <b>1</b> |
| <b>STS2<sub>CN</sub>-1</b>                          | <b>0.602614</b> | <b>-1627.178716</b> | <b>-1626.576102</b> | <b>1</b> |
| <b>STS2<sub>CN</sub>-2</b>                          | <b>0.602891</b> | <b>-1627.183631</b> | <b>-1626.58074</b>  | <b>1</b> |
| <b>STS3<sub>CN</sub>-1</b>                          | <b>0.60549</b>  | <b>-1627.186717</b> | <b>-1626.581227</b> | <b>1</b> |
| <b>STS3<sub>CN</sub>-2</b>                          | <b>0.603173</b> | <b>-1627.184817</b> | <b>-1626.581644</b> | <b>1</b> |
| <b>SM1<sub>CN</sub></b>                             | <b>0.606412</b> | <b>-1627.214761</b> | <b>-1626.608349</b> | <b>0</b> |
| <b>STS4<sub>CN</sub></b>                            | <b>0.602989</b> | <b>-1627.16624</b>  | <b>-1626.563251</b> | <b>1</b> |
| <b>STS5<sub>CN</sub></b>                            | <b>0.607646</b> | <b>-1627.160364</b> | <b>-1626.552718</b> | <b>1</b> |
| <b>STS6<sub>CN</sub></b>                            | <b>0.603964</b> | <b>-1627.147037</b> | <b>-1626.543073</b> | <b>1</b> |

---

**Part 13: The geometries (Å) for all the optimized compounds and transition states of PBu<sub>3</sub>-catalyzed hydroboration of ynamide at M06-2X/6-31G(d,p)/SMD<sub>toluene</sub> level**

**Ynamide**

|   |             |             |             |
|---|-------------|-------------|-------------|
| C | 0.54095200  | -0.14899300 | -0.05193500 |
| C | 1.97152000  | -0.08788100 | -0.02502100 |
| C | 2.61991100  | 1.15542400  | 0.00791400  |
| C | 2.73616400  | -1.26376700 | -0.03072300 |
| C | 4.00766600  | 1.21540300  | 0.03455100  |
| H | 2.02587800  | 2.06326700  | 0.01318700  |
| C | 4.12356400  | -1.19208100 | -0.00167000 |
| H | 2.23443000  | -2.22560800 | -0.05833800 |
| C | 4.76373400  | 0.04477000  | 0.03027200  |
| H | 4.50102700  | 2.18193900  | 0.06060000  |
| H | 4.70736900  | -2.10715000 | -0.00550200 |
| H | 5.84755000  | 0.09636800  | 0.05237000  |
| C | -0.66773500 | -0.17657000 | -0.06593600 |
| C | -2.77293900 | -1.46301000 | 0.16539100  |
| C | -4.18752000 | -0.94269200 | -0.10316300 |
| H | -2.63105900 | -1.79117400 | 1.19991700  |
| H | -2.48208900 | -2.26184700 | -0.51757800 |
| H | -4.93201400 | -1.34409900 | 0.58320900  |
| H | -4.49620900 | -1.12581200 | -1.13601500 |
| O | -4.10205900 | 0.47472300  | 0.10022800  |
| N | -2.01111200 | -0.24406800 | -0.09285400 |
| C | -2.82137900 | 0.88723900  | -0.00351200 |
| O | -2.47053200 | 2.03221900  | -0.01008800 |

---

**PBu<sub>3</sub>**

|   |             |             |             |
|---|-------------|-------------|-------------|
| P | 0.40955800  | 0.16243700  | 1.23356200  |
| C | -0.29551000 | 1.27133600  | -0.08632900 |
| C | 1.80096500  | -0.62433000 | 0.27849200  |
| C | -1.66814800 | 1.83248800  | 0.28682800  |
| H | 0.41139700  | 2.10018600  | -0.21562200 |
| H | -0.34606000 | 0.74288800  | -1.04737100 |
| C | -0.83396500 | -1.22834300 | 1.24682600  |
| C | 3.00436900  | 0.30853700  | 0.12890200  |
| H | 2.10038200  | -1.52518800 | 0.83008800  |
| H | 1.45756600  | -0.95090500 | -0.71121000 |
| C | -2.20458500 | 2.82187000  | -0.74737900 |
| H | -1.60959000 | 2.32564400  | 1.26644000  |
| H | -2.38795400 | 1.01001100  | 0.39950300  |
| C | -1.29516100 | -1.80966700 | -0.08867100 |
| H | -1.70039300 | -0.86623100 | 1.81473200  |
| H | -0.38792100 | -2.01830600 | 1.86544600  |
| C | 4.17403100  | -0.34690000 | -0.60474700 |
| H | 2.70607200  | 1.21502100  | -0.41492800 |
| H | 3.33650300  | 0.64034600  | 1.12116100  |
| C | -3.57648600 | 3.37373600  | -0.37296100 |
| H | -2.25845400 | 2.32573300  | -1.72472500 |
| H | -1.49045600 | 3.64725700  | -0.85872300 |
| C | -2.30637300 | -2.94362000 | 0.08744700  |
| H | -1.75053400 | -1.02166100 | -0.70302800 |
| H | -0.43324100 | -2.18510900 | -0.65469700 |
| C | 5.37009500  | 0.58834200  | -0.75250500 |
| H | 3.83821100  | -0.67847500 | -1.59535100 |
| H | 4.47563200  | -1.25173900 | -0.06223700 |
| H | -4.31221200 | 2.56778800  | -0.28297800 |

---

|   |             |             |             |
|---|-------------|-------------|-------------|
| H | -3.53905700 | 3.89657900  | 0.58825200  |
| H | -3.94457600 | 4.07940000  | -1.12295100 |
| C | -2.77496900 | -3.52247500 | -1.24386600 |
| H | -3.16917600 | -2.57043800 | 0.65350200  |
| H | -1.85641500 | -3.73610900 | 0.69846000  |
| H | 5.73828500  | 0.91090200  | 0.22682500  |
| H | 5.09780200  | 1.48684600  | -1.31594500 |
| H | 6.19774300  | 0.10315700  | -1.27744000 |
| H | -1.93198700 | -3.92563200 | -1.81461500 |
| H | -3.49699800 | -4.33101500 | -1.09923600 |
| H | -3.25351400 | -2.75335100 | -1.85899900 |

**HBpin**

|   |             |             |             |
|---|-------------|-------------|-------------|
| B | 0.00000000  | 0.00000000  | 1.93256800  |
| O | 0.34859100  | 1.08916000  | 1.18561700  |
| O | -0.34859100 | -1.08916000 | 1.18561700  |
| H | 0.00000000  | 0.00000000  | 3.11912300  |
| C | 0.00000000  | 0.78170300  | -0.18716400 |
| C | 1.02258800  | 1.42047900  | -1.11063700 |
| H | 0.83128600  | 1.13644600  | -2.15041900 |
| H | 0.95214200  | 2.50909900  | -1.03836800 |
| H | 2.03996800  | 1.12725000  | -0.84670500 |
| C | -1.38503600 | 1.37531900  | -0.43188200 |
| H | -1.70049200 | 1.24071900  | -1.47023800 |
| H | -2.13227400 | 0.91609300  | 0.22257800  |
| H | -1.35494600 | 2.44609300  | -0.21466900 |
| C | 0.00000000  | -0.78170300 | -0.18716400 |
| C | 1.38503600  | -1.37531900 | -0.43188200 |
| H | 1.35494600  | -2.44609300 | -0.21466900 |
| H | 1.70049200  | -1.24071900 | -1.47023800 |
| H | 2.13227400  | -0.91609300 | 0.22257800  |

---

|                   |             |             |             |
|-------------------|-------------|-------------|-------------|
| C                 | -1.02258800 | -1.42047900 | -1.11063700 |
| H                 | -2.03996800 | -1.12725000 | -0.84670500 |
| H                 | -0.83128600 | -1.13644600 | -2.15041900 |
| H                 | -0.95214200 | -2.50909900 | -1.03836800 |
| H <sub>2</sub> O  |             |             |             |
| O                 | 0.00000000  | 0.11848400  | 0.00000000  |
| H                 | 0.75929700  | -0.47399100 | 0.00000000  |
| H                 | -0.75929700 | -0.47388200 | 0.00000000  |
| 2H <sub>2</sub> O |             |             |             |
| O                 | 1.37152000  | 0.03387800  | -0.11412100 |
| H                 | 1.67115600  | -0.84198900 | 0.15712900  |
| H                 | 1.66955000  | 0.62299700  | 0.58907800  |
| O                 | -1.49213700 | -0.03542200 | 0.11418400  |
| H                 | -1.84597500 | 0.23174600  | -0.73964000 |
| H                 | -0.52979200 | -0.00040400 | -0.00706800 |
| TS1               |             |             |             |
| P                 | 0.98949900  | -0.09227600 | -0.26504800 |
| C                 | 2.72428000  | -0.63533100 | 0.10385500  |
| C                 | -0.01749200 | -1.62874200 | -0.18480900 |
| C                 | 3.22928600  | -1.88193300 | -0.62541200 |
| H                 | 3.34911700  | 0.23448900  | -0.12904400 |
| H                 | 2.78928100  | -0.78126500 | 1.18917700  |
| C                 | 1.02041500  | 0.28152800  | -2.06888700 |
| C                 | -0.39867700 | 1.39489100  | 0.77272300  |
| C                 | -0.08320400 | -2.22370700 | 1.22119400  |
| H                 | -1.02833100 | -1.36480200 | -0.51822500 |
| H                 | 0.37689300  | -2.35913800 | -0.90236900 |
| C                 | 4.68802100  | -2.19418200 | -0.28740900 |
| H                 | 3.13352700  | -1.74708700 | -1.71027800 |
| H                 | 2.60810600  | -2.74783100 | -0.36120500 |

---

|   |             |             |             |
|---|-------------|-------------|-------------|
| C | -0.30554100 | 0.84351300  | -2.58416500 |
| H | 1.27580500  | -0.63558700 | -2.61485400 |
| H | 1.82701200  | 1.00531200  | -2.22322100 |
| N | 0.42734200  | 2.34757300  | 1.36040100  |
| C | -1.62737100 | 1.13478200  | 0.75263100  |
| C | -0.98119500 | -3.45790800 | 1.28786700  |
| H | 0.92573200  | -2.48881600 | 1.56776900  |
| H | -0.45945400 | -1.45870200 | 1.91369600  |
| C | 5.19793300  | -3.44075300 | -1.00362500 |
| H | 4.78545100  | -2.32337800 | 0.79775700  |
| H | 5.31059400  | -1.33135100 | -0.55354400 |
| C | -0.29569400 | 1.08283100  | -4.09287300 |
| H | -1.12559600 | 0.15580600  | -2.33579600 |
| H | -0.52532800 | 1.78470400  | -2.06554800 |
| C | 0.18416200  | 2.82634700  | 2.71307100  |
| C | 1.61182700  | 2.81480400  | 0.86031900  |
| C | -2.76852600 | 0.34020200  | 0.46435200  |
| C | -1.12699700 | -3.99826200 | 2.70638500  |
| H | -0.57214500 | -4.23625400 | 0.63130300  |
| H | -1.96833200 | -3.19755300 | 0.88687500  |
| H | 4.60632000  | -4.32055200 | -0.73021500 |
| H | 5.13387700  | -3.32228300 | -2.09013800 |
| H | 6.24150900  | -3.64872600 | -0.75179400 |
| C | -1.63085800 | 1.62360900  | -4.59513900 |
| H | -0.05920800 | 0.14359200  | -4.60861200 |
| H | 0.50922400  | 1.78539900  | -4.34169700 |
| C | 1.21341800  | 3.95785200  | 2.79436300  |
| H | -0.84353900 | 3.17820600  | 2.81518400  |
| H | 0.36560800  | 2.02633500  | 3.43917900  |
| O | 2.15938400  | 3.67176100  | 1.75396600  |

---

|    |             |             |             |
|----|-------------|-------------|-------------|
| O  | 2.14199500  | 2.53978500  | -0.19206600 |
| C  | -3.24122500 | -0.62348000 | 1.38225200  |
| C  | -3.48247900 | 0.50425200  | -0.74351400 |
| H  | -1.57986600 | -3.24881000 | 3.36452600  |
| H  | -0.15326600 | -4.26553100 | 3.13041200  |
| H  | -1.75895700 | -4.89032000 | 2.73319000  |
| H  | -1.87878300 | 2.57064900  | -4.10438400 |
| H  | -1.61417900 | 1.80090000  | -5.67417800 |
| H  | -2.44175500 | 0.91784500  | -4.38480800 |
| H  | 1.74673200  | 3.99246700  | 3.74400400  |
| H  | 0.76158000  | 4.93239700  | 2.59024900  |
| C  | -4.35404100 | -1.40097900 | 1.08805600  |
| H  | -2.72296300 | -0.74839500 | 2.32861400  |
| C  | -4.58909700 | -0.28542100 | -1.02795000 |
| H  | -3.15288000 | 1.26093300  | -1.44900000 |
| C  | -5.03370500 | -1.24619100 | -0.12019600 |
| H  | -4.69164900 | -2.13856000 | 1.81099100  |
| H  | -5.11348700 | -0.14421500 | -1.96875700 |
| H  | -5.90099400 | -1.85745000 | -0.34610200 |
| M1 |             |             |             |
| P  | -0.61421300 | 0.15312700  | -0.41661600 |
| C  | -2.21286800 | 0.97796500  | -0.09795000 |
| C  | 0.60451000  | 1.46862500  | -0.74375000 |
| C  | -2.63430400 | 1.97162600  | -1.18418200 |
| H  | -2.95541700 | 0.18036900  | 0.00031100  |
| H  | -2.12575400 | 1.47117700  | 0.87731300  |
| C  | -0.77936800 | -0.77175700 | -1.98557900 |
| C  | -0.08253700 | -0.80929600 | 1.04694400  |
| C  | 0.67115100  | 2.53188500  | 0.35283200  |
| H  | 1.58099400  | 0.99084900  | -0.87833200 |



---

|   |             |             |             |
|---|-------------|-------------|-------------|
| H | 0.32480100  | 1.91681800  | -1.70528900 |
| C | -3.97786500 | 2.62468500  | -0.85826500 |
| H | -2.70957600 | 1.45686800  | -2.15041100 |
| H | -1.87392800 | 2.75471700  | -1.30047700 |
| C | 0.33738700  | -1.79191500 | -2.20069300 |
| H | -0.78302300 | -0.02581200 | -2.78989500 |
| H | -1.75346800 | -1.26468700 | -1.95789300 |
| N | -1.21846000 | -1.30764700 | 1.80525000  |
| C | 1.15142500  | -0.96085300 | 1.51296100  |
| C | 1.77184000  | 3.55513300  | 0.07835000  |
| H | -0.29456700 | 3.04859300  | 0.43473000  |
| H | 0.85270700  | 2.04496900  | 1.31758100  |
| C | -4.41845800 | 3.60990800  | -1.93562900 |
| H | -3.90087900 | 3.13890900  | 0.10758300  |
| H | -4.73633000 | 1.84240400  | -0.73547800 |
| C | 0.18703200  | -2.54088900 | -3.52323000 |
| H | 1.31329700  | -1.29063900 | -2.17473000 |
| H | 0.32786600  | -2.50742100 | -1.36942500 |
| C | -1.04680400 | -1.68286000 | 3.20201400  |
| C | -2.20006800 | -2.07271400 | 1.24501800  |
| C | 2.41107800  | -0.53992800 | 0.97356100  |
| C | 1.91479000  | 4.56488700  | 1.21168900  |
| H | 1.55530100  | 4.07539400  | -0.86325100 |
| H | 2.71901000  | 3.02227500  | -0.06540900 |
| H | -3.68517200 | 4.41372100  | -2.05714500 |
| H | -4.52857100 | 3.10993400  | -2.90320600 |
| H | -5.37869600 | 4.06894100  | -1.68619700 |
| C | 1.30328200  | -3.56055200 | -3.72598500 |
| H | 0.18513300  | -1.82148100 | -4.35167300 |
| H | -0.78700600 | -3.04437600 | -3.54289900 |

---

|    |             |             |             |
|----|-------------|-------------|-------------|
| C  | -2.43320500 | -2.25191500 | 3.49297400  |
| H  | -0.24741400 | -2.42309900 | 3.30182100  |
| H  | -0.79703700 | -0.81601200 | 3.81608700  |
| O  | -2.90893100 | -2.69736700 | 2.21196900  |
| O  | -2.46252900 | -2.18741200 | 0.06399400  |
| C  | 3.11313100  | 0.56419600  | 1.51724100  |
| C  | 3.07823500  | -1.27899300 | -0.03412500 |
| H  | 2.18122300  | 4.06229400  | 2.14745200  |
| H  | 0.97879700  | 5.10781700  | 1.38028300  |
| H  | 2.69369700  | 5.30081200  | 0.99474500  |
| H  | 1.30206600  | -4.30448700 | -2.92299200 |
| H  | 1.19370500  | -4.09189600 | -4.67526600 |
| H  | 2.28380100  | -3.07278600 | -3.72533000 |
| H  | -3.12007100 | -1.48662900 | 3.86783100  |
| H  | -2.42558300 | -3.10401400 | 4.17241800  |
| C  | 4.35310700  | 0.94850000  | 1.02423300  |
| H  | 2.66744900  | 1.11219700  | 2.34303300  |
| C  | 4.32612600  | -0.89291600 | -0.50968300 |
| H  | 2.60244300  | -2.17134300 | -0.42950500 |
| C  | 4.97253100  | 0.23355500  | -0.00239700 |
| H  | 4.84854100  | 1.81383000  | 1.45804100  |
| H  | 4.79963200  | -1.48397600 | -1.28959200 |
| H  | 5.94524300  | 0.53237900  | -0.37814700 |
| M2 |             |             |             |
| P  | 1.14131400  | 0.19517300  | -0.38951300 |
| C  | 2.31734100  | 0.11281500  | 1.00274400  |
| C  | 1.58655400  | -1.10676600 | -1.58031000 |
| C  | 3.78656600  | 0.08753600  | 0.57169400  |
| H  | 2.11344200  | 0.98910000  | 1.62751600  |
| H  | 2.06373800  | -0.77778500 | 1.59006200  |

---

|   |             |             |             |
|---|-------------|-------------|-------------|
| C | 1.40786300  | 1.78847300  | -1.24975400 |
| C | -0.55626300 | -0.07057900 | 0.14175400  |
| C | 1.57861200  | -2.51358800 | -0.98422500 |
| H | 0.84595000  | -1.03301000 | -2.38246100 |
| H | 2.57143300  | -0.84867700 | -1.98772100 |
| C | 4.73165400  | 0.10616600  | 1.77290600  |
| H | 4.00244700  | 0.95233700  | -0.06955700 |
| H | 3.98539500  | -0.80852600 | -0.03012600 |
| C | 0.15379000  | 2.30810100  | -1.95665600 |
| H | 2.22497800  | 1.63288900  | -1.96481000 |
| H | 1.73841900  | 2.50901600  | -0.49655600 |
| N | -0.84095700 | 0.33984600  | 1.49844900  |
| C | -1.35381700 | -0.64628400 | -0.76618300 |
| C | 1.92856400  | -3.57468200 | -2.02656400 |
| H | 2.28972900  | -2.57643500 | -0.14896000 |
| H | 0.58005100  | -2.71222800 | -0.57898000 |
| C | 6.19820700  | 0.07702000  | 1.35595700  |
| H | 4.50986100  | -0.75406600 | 2.41642700  |
| H | 4.53196700  | 1.00271200  | 2.37177600  |
| C | 0.44809000  | 3.56095500  | -2.77936600 |
| H | -0.27572700 | 1.52907000  | -2.59895500 |
| H | -0.59973600 | 2.53236700  | -1.19388100 |
| C | -1.76015600 | -0.34547200 | 2.39759200  |
| C | -0.52001500 | 1.57036500  | 1.97817900  |
| C | -2.76860600 | -0.83665900 | -0.48643300 |
| C | 1.91782500  | -4.98299900 | -1.44143200 |
| H | 2.91619400  | -3.35666100 | -2.45233100 |
| H | 1.21044700  | -3.50996100 | -2.85246900 |
| H | 6.42515400  | -0.82453700 | 0.77785200  |
| H | 6.44630700  | 0.94295900  | 0.73387800  |

---

|      |             |             |             |
|------|-------------|-------------|-------------|
| H    | 6.85964000  | 0.09093700  | 2.22619900  |
| C    | -0.80494000 | 4.11049100  | -3.45354800 |
| H    | 1.20645400  | 3.33009000  | -3.53829100 |
| H    | 0.88405800  | 4.32650500  | -2.12557200 |
| C    | -1.51017600 | 0.44771100  | 3.68380200  |
| H    | -2.79403300 | -0.26101200 | 2.05011800  |
| H    | -1.50401000 | -1.40318800 | 2.49233100  |
| O    | -0.99905300 | 1.71335100  | 3.23685200  |
| O    | 0.12490600  | 2.43363000  | 1.41467700  |
| C    | -3.66916500 | 0.24906700  | -0.50397600 |
| C    | -3.30222000 | -2.11745500 | -0.23828500 |
| H    | 0.93158600  | -5.22900900 | -1.03537400 |
| H    | 2.64585400  | -5.07744700 | -0.62894500 |
| H    | 2.16392700  | -5.73204800 | -2.19885800 |
| H    | -1.56375600 | 4.37399800  | -2.71008000 |
| H    | -0.58384800 | 5.00685200  | -4.03956000 |
| H    | -1.24456200 | 3.36823800  | -4.12741000 |
| H    | -0.75127500 | -0.02474100 | 4.31560000  |
| H    | -2.41347100 | 0.62662500  | 4.26615300  |
| C    | -5.02587000 | 0.06093500  | -0.26491100 |
| H    | -3.28378900 | 1.24572400  | -0.70381000 |
| C    | -4.65579700 | -2.29455500 | 0.02274800  |
| H    | -2.63197200 | -2.97319400 | -0.24623900 |
| C    | -5.53177300 | -1.20926400 | 0.01070300  |
| H    | -5.69430600 | 0.91767200  | -0.28360800 |
| H    | -5.03373200 | -3.29282500 | 0.22714600  |
| H    | -6.59025600 | -1.35210200 | 0.20220100  |
| TS1' |             |             |             |
| P    | 0.00831300  | -0.58843000 | 0.43997100  |
| C    | -0.94663100 | -1.51036400 | -0.83971400 |

---

|   |             |             |             |
|---|-------------|-------------|-------------|
| C | 1.63647100  | -1.47569300 | 0.46818200  |
| C | -0.99346300 | -3.03155500 | -0.69503700 |
| H | -1.95967000 | -1.09625600 | -0.80821700 |
| H | -0.52085800 | -1.22755100 | -1.81046600 |
| C | -0.75048100 | -1.11831000 | 2.04337200  |
| C | -0.89999000 | 2.02645700  | -1.10106700 |
| C | 2.37997900  | -1.44062500 | -0.86828400 |
| H | 2.24586000  | -0.99092900 | 1.24041100  |
| H | 1.47859300  | -2.51255900 | 0.79253500  |
| C | -1.84283800 | -3.68876700 | -1.78359100 |
| H | -1.40033800 | -3.30067600 | 0.28828600  |
| H | 0.02243200  | -3.44613300 | -0.73756300 |
| C | -0.31756300 | -0.22548200 | 3.20671500  |
| H | -0.48014800 | -2.16388900 | 2.23969700  |
| H | -1.83464300 | -1.06305900 | 1.91344300  |
| N | -2.24772900 | 1.88284500  | -1.26133900 |
| C | 0.10771200  | 1.50880500  | -0.51939200 |
| C | 3.80686300  | -1.97627300 | -0.75682500 |
| H | 1.82715100  | -2.02763800 | -1.61457900 |
| H | 2.41971400  | -0.41227000 | -1.24724400 |
| C | -1.89041200 | -5.20742800 | -1.64938100 |
| H | -1.44002500 | -3.41527300 | -2.76691900 |
| H | -2.85997200 | -3.28020700 | -1.74078600 |
| C | -0.94867300 | -0.64494900 | 4.53355800  |
| H | 0.77720100  | -0.24485800 | 3.30898800  |
| H | -0.59523000 | 0.81206300  | 2.98081200  |
| C | -3.01105000 | 2.77782500  | -2.13184200 |
| C | -3.09092800 | 1.31365200  | -0.32354000 |
| C | 1.52137100  | 1.87522200  | -0.38414700 |
| C | 4.55858200  | -1.89224700 | -2.08114400 |

---

|   |             |             |             |
|---|-------------|-------------|-------------|
| H | 3.78324100  | -3.01444900 | -0.40161100 |
| H | 4.34170900  | -1.39614500 | 0.00552700  |
| H | -0.88637000 | -5.63896400 | -1.71687500 |
| H | -2.31410000 | -5.50231600 | -0.68386800 |
| H | -2.50186900 | -5.66076100 | -2.43450100 |
| C | -0.52141100 | 0.25152100  | 5.69133900  |
| H | -0.67780500 | -1.68602500 | 4.75032200  |
| H | -2.04032200 | -0.62310300 | 4.42966800  |
| C | -4.41943300 | 2.22559200  | -1.93089000 |
| H | -2.91065800 | 3.81324900  | -1.79043800 |
| H | -2.66974100 | 2.70221800  | -3.16452100 |
| O | -4.37271200 | 1.60809400  | -0.63567100 |
| O | -2.78217000 | 0.66392800  | 0.64560800  |
| C | 2.20714000  | 2.37042600  | -1.50466300 |
| C | 2.22306800  | 1.73857600  | 0.81878100  |
| H | 4.61998500  | -0.85355900 | -2.42251200 |
| H | 4.05066000  | -2.47004100 | -2.86047100 |
| H | 5.57821800  | -2.27715300 | -1.99068700 |
| H | -0.80629400 | 1.29199000  | 5.50537100  |
| H | -0.98489200 | -0.05918200 | 6.63182700  |
| H | 0.56461700  | 0.22451900  | 5.82912900  |
| H | -4.66648600 | 1.45862700  | -2.67106800 |
| H | -5.19568400 | 2.98995900  | -1.91967700 |
| C | 3.55853500  | 2.68538800  | -1.42709400 |
| H | 1.66070800  | 2.48838900  | -2.43472500 |
| C | 3.57706600  | 2.05435000  | 0.89447800  |
| H | 1.69379300  | 1.38676000  | 1.70071100  |
| C | 4.25428700  | 2.51940800  | -0.22973200 |
| H | 4.07372600  | 3.05539100  | -2.30852400 |
| H | 4.10197200  | 1.94129100  | 1.83834600  |

---

|      |             |             |             |
|------|-------------|-------------|-------------|
| H    | 5.31147400  | 2.75804000  | -0.17275800 |
| TS1" |             |             |             |
| C    | 1.17392500  | 0.47829000  | 0.59724600  |
| C    | 1.31082800  | 1.91294500  | 0.88340100  |
| C    | 2.34179700  | 2.63737500  | 0.26461300  |
| C    | 0.45500200  | 2.59062600  | 1.76045200  |
| C    | 2.49858700  | 3.99603300  | 0.51623000  |
| H    | 3.02056100  | 2.11362900  | -0.39793000 |
| C    | 0.61705800  | 3.94913600  | 2.01235900  |
| H    | -0.33675100 | 2.04021000  | 2.26109300  |
| C    | 1.63737000  | 4.66099200  | 1.38694000  |
| H    | 3.29919100  | 4.53958100  | 0.02352100  |
| H    | -0.05402600 | 4.45090300  | 2.70309100  |
| H    | 1.76155100  | 5.72233900  | 1.57748500  |
| C    | 1.73901800  | -0.61781600 | 0.29989300  |
| C    | 2.85261200  | -2.74844900 | -0.28848500 |
| C    | 4.34435700  | -3.07038200 | -0.23808800 |
| H    | 2.42308200  | -2.89447400 | -1.28597900 |
| H    | 2.27266300  | -3.31768900 | 0.43954700  |
| H    | 4.67368500  | -3.75729800 | -1.01731500 |
| H    | 4.64500300  | -3.45427100 | 0.74131400  |
| O    | 4.98901100  | -1.80645400 | -0.44755200 |
| N    | 2.86630000  | -1.32793200 | 0.05587600  |
| C    | 4.13704500  | -0.79867300 | -0.14394500 |
| O    | 4.47569500  | 0.35249400  | -0.08363200 |
| P    | -0.95420200 | -0.00335900 | 0.48213300  |
| C    | -1.11273700 | -0.20013600 | -1.33861300 |
| C    | -1.07794200 | -1.68857600 | 1.21120300  |
| C    | -1.18830000 | 1.14910600  | -2.05618100 |
| H    | -0.21431400 | -0.74467100 | -1.65194200 |

---

|   |             |             |             |
|---|-------------|-------------|-------------|
| H | -1.97861100 | -0.82379900 | -1.58794000 |
| C | -2.54385000 | 0.83002300  | 0.96544300  |
| C | -1.54343400 | -2.82610800 | 0.30101200  |
| H | -0.06301800 | -1.90733600 | 1.56738400  |
| H | -1.73332700 | -1.60514500 | 2.08722200  |
| C | -1.21021100 | 0.99635700  | -3.57668600 |
| H | -0.32890200 | 1.76690700  | -1.76384000 |
| H | -2.08762700 | 1.69397000  | -1.73800900 |
| C | -3.83742400 | 0.20224300  | 0.44305000  |
| H | -2.46512800 | 1.87542500  | 0.64178100  |
| H | -2.55088800 | 0.85091500  | 2.06315100  |
| C | -1.60196700 | -4.16214500 | 1.04082000  |
| H | -2.53198000 | -2.60359100 | -0.12176000 |
| H | -0.85371300 | -2.91249200 | -0.54882400 |
| C | -1.29228000 | 2.33911600  | -4.29527100 |
| H | -2.06312900 | 0.36809800  | -3.86377200 |
| H | -0.30808000 | 0.45966600  | -3.89476900 |
| C | -5.08309900 | 0.94819800  | 0.92382400  |
| H | -3.82851000 | 0.19115000  | -0.65474600 |
| H | -3.89642700 | -0.84605200 | 0.76570500  |
| C | -2.03455800 | -5.31210700 | 0.13688500  |
| H | -2.29396600 | -4.07506700 | 1.88783700  |
| H | -0.61545900 | -4.37752000 | 1.47079300  |
| H | -2.20159700 | 2.88020600  | -4.01376400 |
| H | -0.43692700 | 2.97207800  | -4.03872100 |
| H | -1.30154600 | 2.21251600  | -5.38140600 |
| C | -6.37332000 | 0.32465000  | 0.40095200  |
| H | -5.01927200 | 1.99523700  | 0.60277100  |
| H | -5.09431200 | 0.96059200  | 2.02074100  |
| H | -1.33953700 | -5.43566200 | -0.70006100 |



---

|    |             |             |             |
|----|-------------|-------------|-------------|
| H  | -3.02892900 | -5.12864200 | -0.28292600 |
| H  | -2.07235700 | -6.25894200 | 0.68251500  |
| H  | -6.47014900 | -0.71387700 | 0.73394100  |
| H  | -7.25319700 | 0.87093900  | 0.75155200  |
| H  | -6.39362600 | 0.32557400  | -0.69372600 |
| M3 |             |             |             |
| P  | -1.38831100 | -0.05242800 | -0.04406100 |
| C  | -3.07282900 | -0.77138400 | -0.03310400 |
| C  | -1.49028600 | 1.48565100  | 0.96232300  |
| C  | -4.18199300 | 0.22507800  | -0.37473400 |
| H  | -3.06060900 | -1.58316000 | -0.76787500 |
| H  | -3.23556900 | -1.21540500 | 0.95492200  |
| C  | -1.14411800 | 0.51908600  | -1.79787600 |
| C  | -0.31274600 | -1.18654200 | 0.64371200  |
| C  | -1.92443500 | 1.22725700  | 2.40375900  |
| H  | -0.50646800 | 1.96604100  | 0.93260800  |
| H  | -2.18432500 | 2.17283200  | 0.46431500  |
| C  | -5.55380400 | -0.44762200 | -0.43032500 |
| H  | -3.97507700 | 0.69556400  | -1.34522900 |
| H  | -4.21073900 | 1.03421300  | 0.36699900  |
| C  | -1.31937500 | 2.00778900  | -2.09300700 |
| H  | -1.80170000 | -0.09882500 | -2.42020200 |
| H  | -0.11763900 | 0.22494100  | -2.03496200 |
| N  | -0.66164200 | -2.56588300 | 0.49544900  |
| C  | 1.12224300  | -0.92099500 | 1.04186800  |
| C  | -1.94333700 | 2.50479300  | 3.24220400  |
| H  | -2.92525900 | 0.77350200  | 2.41390100  |
| H  | -1.24995300 | 0.49190200  | 2.85794000  |
| C  | -6.67057600 | 0.53558800  | -0.76504400 |
| H  | -5.75724900 | -0.92692900 | 0.53532200  |

---

|   |             |             |             |
|---|-------------|-------------|-------------|
| H | -5.52859300 | -1.25106100 | -1.17614200 |
| C | -0.94924000 | 2.35192300  | -3.53545700 |
| H | -2.35213900 | 2.32834800  | -1.89951500 |
| H | -0.67696900 | 2.58672800  | -1.41820400 |
| C | -0.72920400 | -3.47795900 | 1.62513800  |
| C | -1.01624500 | -3.19343100 | -0.65508500 |
| C | 2.16551800  | -1.76443800 | 0.29465900  |
| C | -2.38528300 | 2.24874900  | 4.67949600  |
| H | -2.61120700 | 3.23879200  | 2.77384900  |
| H | -0.94066200 | 2.95104100  | 3.23786300  |
| H | -6.73062300 | 1.33252300  | -0.01656700 |
| H | -6.49965800 | 1.00627100  | -1.73865400 |
| H | -7.64348200 | 0.03802000  | -0.80145700 |
| C | -1.07648500 | 3.84341300  | -3.82878400 |
| H | -1.58508600 | 1.77976200  | -4.22228100 |
| H | 0.08040500  | 2.02064500  | -3.72436900 |
| C | -0.75203000 | -4.82412000 | 0.89972800  |
| H | 0.14862700  | -3.37246800 | 2.26884800  |
| H | -1.63017800 | -3.29179200 | 2.22453600  |
| O | -1.24524800 | -4.51359200 | -0.40965700 |
| O | -1.19040400 | -2.70245400 | -1.75545300 |
| C | 3.35807700  | -2.12866400 | 0.93071700  |
| C | 1.98674300  | -2.12532500 | -1.04493800 |
| H | -1.71599500 | 1.53672000  | 5.17282000  |
| H | -3.39634800 | 1.82963400  | 4.70987100  |
| H | -2.38771500 | 3.16982100  | 5.26882900  |
| H | -0.43115700 | 4.42973400  | -3.16517500 |
| H | -0.79650300 | 4.07702600  | -4.85977000 |
| H | -2.10486700 | 4.18717500  | -3.67602100 |
| H | -1.41389200 | -5.56231700 | 1.35325800  |

---

|   |            |             |             |
|---|------------|-------------|-------------|
| H | 0.25531600 | -5.24175200 | 0.80263300  |
| C | 4.34661200 | -2.83447000 | 0.25044700  |
| H | 3.51131000 | -1.84345100 | 1.96913500  |
| C | 2.97315800 | -2.83609500 | -1.72511700 |
| H | 1.05776800 | -1.86159600 | -1.54414600 |
| C | 4.15705800 | -3.19213600 | -1.08300800 |
| H | 5.26454500 | -3.10722400 | 0.76299000  |
| H | 2.81165700 | -3.11575600 | -2.76201600 |
| H | 4.92341600 | -3.74758300 | -1.61484100 |
| B | 1.72410300 | 0.50508400  | 0.75040000  |
| O | 1.44338600 | 1.24903500  | -0.37561900 |
| O | 2.71786000 | 1.06311500  | 1.51317500  |
| H | 1.28960100 | -1.11810500 | 2.11436900  |
| C | 2.55807100 | 2.15618000  | -0.55458100 |
| C | 2.06321000 | 3.43243400  | -1.21196600 |
| H | 2.87745700 | 4.15896800  | -1.29971200 |
| H | 1.69927600 | 3.20804500  | -2.21943200 |
| H | 1.24857900 | 3.88866600  | -0.64488600 |
| C | 3.55501700 | 1.43436200  | -1.45821900 |
| H | 4.41073900 | 2.06997700  | -1.70241600 |
| H | 3.91973800 | 0.51530600  | -0.98733700 |
| H | 3.04910900 | 1.15669300  | -2.38715900 |
| C | 3.07816300 | 2.32648300  | 0.91027100  |
| C | 2.34257700 | 3.41778800  | 1.68264300  |
| H | 2.59696300 | 3.33306800  | 2.74224600  |
| H | 2.62597600 | 4.41562700  | 1.33604500  |
| H | 1.25784000 | 3.31060700  | 1.58358300  |
| C | 4.58146900 | 2.51416400  | 1.03003900  |
| H | 5.12144200 | 1.65479300  | 0.62882400  |
| H | 4.90140100 | 3.41487800  | 0.49646500  |

---

|      |             |             |             |
|------|-------------|-------------|-------------|
| H    | 4.85380000  | 2.62756500  | 2.08283500  |
| TS2R |             |             |             |
| P    | -1.44367200 | -0.14181300 | -0.03728800 |
| C    | -2.82295600 | -1.33427800 | -0.12495900 |
| C    | -1.67720000 | 0.76475700  | 1.54503500  |
| C    | -4.20845900 | -0.71606600 | -0.32673700 |
| H    | -2.58078600 | -2.01601700 | -0.94713600 |
| H    | -2.79330500 | -1.92292300 | 0.80070000  |
| C    | -1.60879100 | 1.01987200  | -1.43262400 |
| C    | 0.04436700  | -1.06964900 | -0.17148900 |
| C    | -1.06695700 | -0.01171200 | 2.71375800  |
| H    | -1.17861300 | 1.73036800  | 1.44427800  |
| H    | -2.74989200 | 0.93556800  | 1.69686500  |
| C    | -5.30052300 | -1.78632700 | -0.35047000 |
| H    | -4.23297700 | -0.16133100 | -1.27369100 |
| H    | -4.43340000 | 0.00713800  | 0.46794800  |
| C    | -2.44654200 | 2.26763100  | -1.15029100 |
| H    | -2.02119200 | 0.43233100  | -2.26254500 |
| H    | -0.58903200 | 1.30459600  | -1.70858600 |
| N    | -0.04384800 | -2.45476700 | 0.17839300  |
| C    | 1.30992200  | -0.47807800 | -0.29754300 |
| C    | -1.22948600 | 0.72298800  | 4.04303900  |
| H    | -1.52455400 | -1.00817900 | 2.79143400  |
| H    | 0.00181600  | -0.16909100 | 2.51290900  |
| C    | -6.68736500 | -1.19318800 | -0.57485400 |
| H    | -5.28110000 | -2.34044200 | 0.59595400  |
| H    | -5.07242900 | -2.51209800 | -1.13991600 |
| C    | -2.68689100 | 3.08199000  | -2.42120400 |
| H    | -3.41382900 | 2.00253700  | -0.70508700 |
| H    | -1.92013100 | 2.88367000  | -0.41053500 |

---

|   |             |             |             |
|---|-------------|-------------|-------------|
| C | 0.52856600  | -3.00957700 | 1.39838000  |
| C | -0.37235600 | -3.44731500 | -0.70535100 |
| C | 2.44909500  | -1.37622800 | -0.67687900 |
| C | -0.60428200 | -0.04258700 | 5.20455700  |
| H | -2.29565300 | 0.89257400  | 4.23868000  |
| H | -0.76619600 | 1.71370000  | 3.95780700  |
| H | -6.94459100 | -0.48273000 | 0.21758200  |
| H | -6.73601800 | -0.65926900 | -1.52933200 |
| H | -7.45558200 | -1.97083500 | -0.58829900 |
| C | -3.37216500 | 4.41345100  | -2.13381500 |
| H | -3.29398600 | 2.48892000  | -3.11628500 |
| H | -1.72764700 | 3.25749100  | -2.92411900 |
| C | 0.82965300  | -4.44005700 | 0.94723500  |
| H | 1.43385900  | -2.46607200 | 1.68533000  |
| H | -0.18813300 | -2.96968600 | 2.22825600  |
| O | -0.03960700 | -4.65146500 | -0.17488300 |
| O | -0.90819700 | -3.33680600 | -1.78560000 |
| C | 3.68431500  | -1.37911600 | -0.01764000 |
| C | 2.27859300  | -2.23451500 | -1.77253300 |
| H | 0.46645600  | -0.19781900 | 5.03760600  |
| H | -1.06920300 | -1.02714900 | 5.32160400  |
| H | -0.72138100 | 0.49582300  | 6.14890700  |
| H | -2.75430900 | 5.03694400  | -1.47862000 |
| H | -3.55643200 | 4.97540600  | -3.05324600 |
| H | -4.33523600 | 4.26134200  | -1.63549300 |
| H | 0.60972800  | -5.19679800 | 1.70022600  |
| H | 1.86543500  | -4.54246900 | 0.60764800  |
| C | 4.71561700  | -2.21120800 | -0.44208600 |
| H | 3.82996700  | -0.72390400 | 0.83582900  |
| C | 3.31085800  | -3.06768900 | -2.19432000 |

---

|     |             |             |             |
|-----|-------------|-------------|-------------|
| H   | 1.32588900  | -2.23971400 | -2.29428100 |
| C   | 4.53426300  | -3.06296800 | -1.52937200 |
| H   | 5.66443000  | -2.19735700 | 0.08584600  |
| H   | 3.15287100  | -3.72390100 | -3.04472700 |
| H   | 5.33772900  | -3.71705800 | -1.85333500 |
| B   | 1.69600200  | 0.99177700  | -0.00036900 |
| O   | 0.75080700  | 2.01753700  | 0.31686200  |
| O   | 2.89704700  | 1.58492300  | -0.45926700 |
| H   | 1.89255100  | 0.13448800  | 1.06356600  |
| C   | 1.38440400  | 3.27672500  | 0.04829800  |
| C   | 0.94490300  | 4.28283900  | 1.10169300  |
| H   | 1.48945100  | 5.22696200  | 0.99446300  |
| H   | -0.12298800 | 4.49757600  | 0.98693100  |
| H   | 1.10732700  | 3.89563600  | 2.10989000  |
| C   | 0.94763900  | 3.74314100  | -1.34017000 |
| H   | 1.35641300  | 4.72830300  | -1.58435400 |
| H   | 1.27074700  | 3.03057200  | -2.10563600 |
| H   | -0.14371000 | 3.81521600  | -1.36687000 |
| C   | 2.90172700  | 2.90517800  | 0.08445800  |
| C   | 3.44446200  | 2.84186500  | 1.51430400  |
| H   | 4.43114000  | 2.37045000  | 1.49237100  |
| H   | 3.54615700  | 3.83732300  | 1.95690900  |
| H   | 2.79313400  | 2.23894300  | 2.15513400  |
| C   | 3.79528400  | 3.78643800  | -0.77434500 |
| H   | 3.52323300  | 3.71480600  | -1.82901600 |
| H   | 3.73262600  | 4.83400600  | -0.46116000 |
| H   | 4.83476700  | 3.46244100  | -0.67133800 |
| M4R |             |             |             |
| P   | -1.43082200 | -0.02477600 | -0.04765700 |
| C   | -2.84238600 | -1.18684300 | -0.07204400 |

---

|   |             |             |             |
|---|-------------|-------------|-------------|
| C | -1.59600100 | 0.90217100  | 1.51143000  |
| C | -4.19305400 | -0.50939900 | 0.17853300  |
| H | -2.83975800 | -1.66258900 | -1.05797100 |
| H | -2.65453400 | -1.96647200 | 0.67530400  |
| C | -1.61491800 | 1.06760100  | -1.50143300 |
| C | 0.07038500  | -1.04956600 | -0.11770900 |
| C | -1.54457700 | -0.00545000 | 2.74186500  |
| H | -0.80131800 | 1.64987700  | 1.53368900  |
| H | -2.55377100 | 1.43289200  | 1.45281800  |
| C | -5.35443000 | -1.48823900 | 0.00368400  |
| H | -4.32526000 | 0.33245200  | -0.51479000 |
| H | -4.22459200 | -0.09243000 | 1.19272800  |
| C | -2.09294500 | 2.48379200  | -1.18134700 |
| H | -2.28764400 | 0.55104000  | -2.19514700 |
| H | -0.62523000 | 1.09409400  | -1.96122400 |
| N | -0.16766100 | -2.38352000 | -0.56342500 |
| C | 1.28775200  | -0.60277200 | 0.26037400  |
| C | -1.52719400 | 0.81438800  | 4.03110000  |
| H | -2.40653900 | -0.68704500 | 2.75050200  |
| H | -0.63976900 | -0.62447800 | 2.69939000  |
| C | -6.70618600 | -0.83381100 | 0.26775300  |
| H | -5.21239800 | -2.33699100 | 0.68406500  |
| H | -5.32980400 | -1.89670900 | -1.01351400 |
| C | -2.17148800 | 3.33932300  | -2.44517100 |
| H | -3.07983000 | 2.46087500  | -0.69989900 |
| H | -1.39023900 | 2.93687600  | -0.47290400 |
| C | 0.01230900  | -3.58522500 | 0.23548800  |
| C | -0.63347300 | -2.66930500 | -1.81150800 |
| C | 2.44965200  | -1.51577100 | 0.12327200  |
| C | -1.48021300 | -0.06580900 | 5.27522300  |

---

|   |             |             |             |
|---|-------------|-------------|-------------|
| H | -2.41346600 | 1.46067200  | 4.06322800  |
| H | -0.65318300 | 1.47606400  | 4.00821300  |
| H | -6.76189400 | -0.44413700 | 1.28924800  |
| H | -6.87787400 | 0.00217400  | -0.41779700 |
| H | -7.52484300 | -1.54620300 | 0.13678200  |
| C | -2.57781600 | 4.77706800  | -2.13948700 |
| H | -2.88271300 | 2.88950200  | -3.14896100 |
| H | -1.19448200 | 3.32694000  | -2.94533400 |
| C | -0.01743100 | -4.64463800 | -0.87251400 |
| H | 0.96679600  | -3.57294700 | 0.76573000  |
| H | -0.80430000 | -3.70050400 | 0.95922700  |
| O | -0.68907500 | -4.01051400 | -1.97451700 |
| O | -0.98464100 | -1.87228800 | -2.65447700 |
| C | 3.30021700  | -1.72712100 | 1.21600000  |
| C | 2.74075800  | -2.15286200 | -1.09129300 |
| H | -0.58484200 | -0.69540700 | 5.27254000  |
| H | -2.35304900 | -0.72530200 | 5.32647400  |
| H | -1.46235900 | 0.53564800  | 6.18800000  |
| H | -1.86257700 | 5.24771400  | -1.45671300 |
| H | -2.62228000 | 5.38219000  | -3.04893500 |
| H | -3.56356400 | 4.81389100  | -1.66409400 |
| H | -0.57133400 | -5.54402100 | -0.60513500 |
| H | 0.99386900  | -4.91104400 | -1.19263900 |
| C | 4.38090800  | -2.59707000 | 1.11205900  |
| H | 3.10510400  | -1.20102000 | 2.14543700  |
| C | 3.83769800  | -3.00310000 | -1.19995700 |
| H | 2.11268400  | -1.95867100 | -1.95713100 |
| C | 4.65164000  | -3.24031700 | -0.09414700 |
| H | 5.02345900  | -2.76150000 | 1.97159200  |
| H | 4.05728400  | -3.47924900 | -2.15090000 |



---

|      |             |             |             |
|------|-------------|-------------|-------------|
| H    | 5.50203300  | -3.90996900 | -0.17646100 |
| B    | 1.56106200  | 0.89800200  | 0.90051800  |
| O    | 0.82175800  | 1.93457600  | 0.11521700  |
| O    | 2.97515200  | 1.25078800  | 0.77563700  |
| H    | 1.16403700  | 0.87383700  | 2.07458000  |
| C    | 1.79333500  | 2.70920300  | -0.57861500 |
| C    | 1.26414600  | 4.12553100  | -0.76877400 |
| H    | 2.04609900  | 4.79095900  | -1.15145600 |
| H    | 0.44319300  | 4.12655400  | -1.49466900 |
| H    | 0.88744400  | 4.53189400  | 0.17321900  |
| C    | 2.08007300  | 2.07204700  | -1.94149900 |
| H    | 2.79405900  | 2.66189500  | -2.52542000 |
| H    | 2.48192100  | 1.06154700  | -1.81448000 |
| H    | 1.15346500  | 2.00945900  | -2.52080100 |
| C    | 3.03333500  | 2.59994800  | 0.36268400  |
| C    | 2.89019200  | 3.51530000  | 1.58470700  |
| H    | 3.64594400  | 3.23123300  | 2.32270500  |
| H    | 3.03379100  | 4.57091300  | 1.33108900  |
| H    | 1.90408400  | 3.39406700  | 2.04316400  |
| C    | 4.37306400  | 2.85132300  | -0.31761100 |
| H    | 4.56832700  | 2.09674700  | -1.08242900 |
| H    | 4.40822400  | 3.84469400  | -0.77892500 |
| H    | 5.17661900  | 2.79338700  | 0.42297900  |
| TS2S |             |             |             |
| P    | -1.37306700 | 0.01176800  | -0.02313700 |
| C    | -2.83513500 | -1.06438800 | 0.23277300  |
| C    | -1.31164800 | 1.19861300  | 1.36026000  |
| C    | -4.03012000 | -0.40238600 | 0.92694200  |
| H    | -3.12043900 | -1.44404900 | -0.75639100 |
| H    | -2.49647800 | -1.92817500 | 0.81429800  |

---

|   |             |             |             |
|---|-------------|-------------|-------------|
| C | -1.64693500 | 0.94764400  | -1.56898600 |
| C | 0.03319900  | -1.03858400 | -0.10620700 |
| C | -0.95246600 | 0.53915900  | 2.69315300  |
| H | -0.56940400 | 1.95234000  | 1.08182200  |
| H | -2.29115300 | 1.68981400  | 1.41161300  |
| C | -5.23727400 | -1.33871900 | 0.97837600  |
| H | -4.31528900 | 0.52386000  | 0.41446300  |
| H | -3.75157600 | -0.11729300 | 1.94945500  |
| C | -2.96329300 | 1.71727800  | -1.68999700 |
| H | -1.54108500 | 0.20173300  | -2.36635100 |
| H | -0.78678200 | 1.62244300  | -1.64124000 |
| N | -0.28555900 | -2.39427000 | -0.43993200 |
| C | 1.35103600  | -0.55385300 | -0.19457600 |
| C | -1.02736000 | 1.52775000  | 3.85572700  |
| H | -1.62173100 | -0.30957700 | 2.89440500  |
| H | 0.05808600  | 0.12037400  | 2.62072700  |
| C | -6.42638000 | -0.71170300 | 1.69848500  |
| H | -4.94847100 | -2.27118400 | 1.47909600  |
| H | -5.52345000 | -1.61168400 | -0.04469100 |
| C | -2.99093100 | 2.58026500  | -2.95232100 |
| H | -3.80795100 | 1.01688400  | -1.71832600 |
| H | -3.11432100 | 2.36186400  | -0.81333400 |
| C | -0.09300400 | -3.52320200 | 0.45841400  |
| C | -0.44022500 | -2.81544400 | -1.73208000 |
| C | 2.42653500  | -1.59835200 | -0.11682400 |
| C | -0.61001500 | 0.89753200  | 5.18022900  |
| H | -2.05060600 | 1.91669200  | 3.93424800  |
| H | -0.38543700 | 2.38992600  | 3.63543400  |
| H | -6.17053300 | -0.45748300 | 2.73212100  |
| H | -6.74690400 | 0.20814800  | 1.19893700  |

---

|   |             |             |             |
|---|-------------|-------------|-------------|
| H | -7.28099600 | -1.39290400 | 1.72382600  |
| C | -4.30766200 | 3.33201600  | -3.11503700 |
| H | -2.81498500 | 1.94091400  | -3.82562600 |
| H | -2.15637700 | 3.29124100  | -2.91576200 |
| C | -0.59847100 | -4.67175200 | -0.42065900 |
| H | 0.96318800  | -3.63497400 | 0.72794600  |
| H | -0.68001500 | -3.40583100 | 1.37397400  |
| O | -0.52496000 | -4.16993600 | -1.76192400 |
| O | -0.51595400 | -2.13232300 | -2.72812000 |
| C | 3.11332000  | -1.76276100 | 1.08891400  |
| C | 2.71200000  | -2.45167300 | -1.18536000 |
| H | 0.42126900  | 0.53389400  | 5.13165300  |
| H | -1.25146800 | 0.04581000  | 5.42932900  |
| H | -0.67359200 | 1.61533900  | 6.00244900  |
| H | -4.49055000 | 3.99444900  | -2.26252200 |
| H | -4.30765200 | 3.94550000  | -4.01999700 |
| H | -5.15085700 | 2.63691400  | -3.18320900 |
| H | -1.64197700 | -4.92334800 | -0.20435100 |
| H | 0.01365400  | -5.57134500 | -0.35412200 |
| C | 4.05138700  | -2.78105500 | 1.23318200  |
| H | 2.90596500  | -1.08332200 | 1.91134200  |
| C | 3.65461300  | -3.46776600 | -1.04301300 |
| H | 2.18683500  | -2.31248300 | -2.12724300 |
| C | 4.32030800  | -3.63968500 | 0.16852700  |
| H | 4.57875700  | -2.90026700 | 2.17484600  |
| H | 3.86786000  | -4.12520000 | -1.88035600 |
| H | 5.05299400  | -4.43298100 | 0.28024700  |
| B | 1.88120200  | 0.87657400  | -0.41773600 |
| O | 3.23219600  | 1.24922200  | -0.17195800 |
| O | 1.05858600  | 2.04544500  | -0.39543600 |

---

|     |             |             |             |
|-----|-------------|-------------|-------------|
| H   | 1.75591800  | 0.12178800  | -1.56018100 |
| C   | 3.23566200  | 2.63633700  | 0.15672000  |
| C   | 4.52851700  | 3.26471900  | -0.34185100 |
| H   | 4.52182500  | 4.35000100  | -0.19361100 |
| H   | 5.37544100  | 2.85096300  | 0.21305800  |
| H   | 4.68457900  | 3.05301100  | -1.40130400 |
| C   | 3.14294900  | 2.75485900  | 1.67974500  |
| H   | 3.22630800  | 3.79103000  | 2.02231600  |
| H   | 2.19448600  | 2.34053600  | 2.03875000  |
| H   | 3.95674400  | 2.17556200  | 2.12443400  |
| C   | 1.94568400  | 3.15959000  | -0.55037200 |
| C   | 2.16072000  | 3.39445400  | -2.04532600 |
| H   | 1.18920700  | 3.55029900  | -2.52424100 |
| H   | 2.78178900  | 4.27512800  | -2.23397000 |
| H   | 2.63463300  | 2.52419100  | -2.50928600 |
| C   | 1.30894800  | 4.38160700  | 0.09239200  |
| H   | 1.02385500  | 4.18297700  | 1.12829600  |
| H   | 1.99530800  | 5.23459800  | 0.07634000  |
| H   | 0.40761000  | 4.66207500  | -0.46193300 |
| M4S |             |             |             |
| P   | 1.32030600  | 0.12711900  | -0.05035400 |
| C   | 2.67013200  | 1.23136700  | 0.52456400  |
| C   | 1.33907200  | -1.34718500 | 1.04284500  |
| C   | 3.84827300  | 0.55379200  | 1.22980900  |
| H   | 3.01388200  | 1.78314900  | -0.35960300 |
| H   | 2.20753500  | 1.96400700  | 1.19273000  |
| C   | 1.85399800  | -0.51807200 | -1.69389100 |
| C   | -0.15085200 | 1.04025400  | 0.03610000  |
| C   | 0.78430100  | -1.07973700 | 2.44115000  |
| H   | 0.76573000  | -2.13109000 | 0.53760900  |

---

|   |             |             |             |
|---|-------------|-------------|-------------|
| H | 2.37719000  | -1.69733600 | 1.09598900  |
| C | 4.96630100  | 1.54923500  | 1.53901400  |
| H | 4.25419000  | -0.26153800 | 0.61926800  |
| H | 3.50436200  | 0.09664600  | 2.16669000  |
| C | 3.24152500  | -1.15302300 | -1.80367800 |
| H | 1.75672200  | 0.34079300  | -2.36878700 |
| H | 1.07696700  | -1.23588800 | -1.98352400 |
| N | 0.10760500  | 2.44935300  | -0.15772300 |
| C | -1.42609100 | 0.57066700  | -0.69618100 |
| C | 0.97593900  | -2.27474400 | 3.37439400  |
| H | 1.26622100  | -0.19438800 | 2.87824200  |
| H | -0.27839600 | -0.82006100 | 2.36147000  |
| C | 6.13325400  | 0.90183900  | 2.27726100  |
| H | 4.55908500  | 2.37401100  | 2.13695100  |
| H | 5.32046600  | 1.99300400  | 0.60034700  |
| C | 3.48790900  | -1.74563400 | -3.19217600 |
| H | 4.01398800  | -0.40045200 | -1.59793400 |
| H | 3.36484200  | -1.94477700 | -1.05207700 |
| C | -0.26176000 | 3.45916700  | 0.82588300  |
| C | 0.25148000  | 3.01825500  | -1.39080000 |
| C | -2.56635000 | 1.49037500  | -0.29590400 |
| C | 0.27971900  | -2.08029800 | 4.71705100  |
| H | 2.04961600  | -2.44242200 | 3.52854500  |
| H | 0.59345700  | -3.18281100 | 2.88915000  |
| H | 5.80715100  | 0.47874100  | 3.23291300  |
| H | 6.56955000  | 0.09021200  | 1.68601100  |
| H | 6.92552900  | 1.62586800  | 2.48562300  |
| C | 4.87845900  | -2.35719200 | -3.32899800 |
| H | 3.34996600  | -0.96021100 | -3.94499800 |
| H | 2.72424300  | -2.50649100 | -3.39582300 |

---

|   |             |             |             |
|---|-------------|-------------|-------------|
| C | 0.13428900  | 4.74166100  | 0.08964400  |
| H | -1.33411100 | 3.41808200  | 1.04701400  |
| H | 0.29398100  | 3.32191900  | 1.75753700  |
| O | 0.17079500  | 4.37256800  | -1.29482800 |
| O | 0.43949900  | 2.45782800  | -2.45068100 |
| C | -3.17401600 | 1.40071800  | 0.96205700  |
| C | -2.94804800 | 2.53316100  | -1.14329000 |
| H | -0.80089600 | -1.96650100 | 4.58080500  |
| H | 0.64584300  | -1.18062100 | 5.22232200  |
| H | 0.44656800  | -2.93052700 | 5.38410300  |
| H | 5.02806100  | -3.16049100 | -2.59990600 |
| H | 5.03475100  | -2.77824900 | -4.32600500 |
| H | 5.65619400  | -1.60549900 | -3.15888600 |
| H | 1.13129800  | 5.09002000  | 0.38036200  |
| H | -0.58317100 | 5.55383300  | 0.21262900  |
| C | -4.13886300 | 2.32181200  | 1.35537200  |
| H | -2.87482100 | 0.60263300  | 1.63502100  |
| C | -3.90745000 | 3.46627800  | -0.74939900 |
| H | -2.46772800 | 2.62447400  | -2.11538900 |
| C | -4.50650600 | 3.36332700  | 0.50221900  |
| H | -4.60266900 | 2.23309300  | 2.33357100  |
| H | -4.18132800 | 4.27441500  | -1.42123000 |
| H | -5.25442900 | 4.08641700  | 0.81307800  |
| B | -1.78956900 | -0.95270000 | -0.51647300 |
| O | -2.92649400 | -1.43592700 | 0.07951000  |
| O | -1.00463300 | -1.96942600 | -1.02365200 |
| H | -1.28947200 | 0.69824600  | -1.78690900 |
| C | -2.80769200 | -2.87292800 | 0.16278700  |
| C | -4.18176600 | -3.49372700 | -0.02226500 |
| H | -4.11032000 | -4.58576600 | -0.04756300 |

---

|     |             |             |             |
|-----|-------------|-------------|-------------|
| H   | -4.82471500 | -3.21387500 | 0.81640600  |
| H   | -4.65546100 | -3.14947400 | -0.94304700 |
| C   | -2.26030400 | -3.18779800 | 1.55219800  |
| H   | -2.20608800 | -4.26531900 | 1.73215900  |
| H   | -1.26105700 | -2.75980600 | 1.67794000  |
| H   | -2.91918100 | -2.74149500 | 2.30193600  |
| C   | -1.78522400 | -3.18730500 | -0.97569300 |
| C   | -2.44654500 | -3.33767300 | -2.34304900 |
| H   | -1.67045600 | -3.34632300 | -3.11265600 |
| H   | -3.01561500 | -4.26881200 | -2.41272500 |
| H   | -3.11943100 | -2.49959900 | -2.54752000 |
| C   | -0.85939000 | -4.36083700 | -0.70326700 |
| H   | -0.28204600 | -4.22031100 | 0.21325300  |
| H   | -1.43330400 | -5.28860700 | -0.61335100 |
| H   | -0.15876200 | -4.47444900 | -1.53535200 |
| M3' |             |             |             |
| P   | -1.63658100 | -0.25069500 | -0.27154800 |
| C   | -2.16652000 | -1.82462500 | -1.01911400 |
| C   | -2.88447700 | 0.16028700  | 0.99633700  |
| C   | -3.62900200 | -1.83575800 | -1.47113200 |
| H   | -1.48068300 | -1.99970200 | -1.85581700 |
| H   | -1.97660600 | -2.61587600 | -0.28661000 |
| C   | -1.64444100 | 1.01682400  | -1.59443700 |
| C   | 0.04432700  | -0.49655200 | 0.38245800  |
| C   | -2.86188000 | -0.82799300 | 2.16468200  |
| H   | -2.68779600 | 1.17893700  | 1.34123000  |
| H   | -3.86251200 | 0.16660200  | 0.50048200  |
| C   | -3.94679700 | -3.07925700 | -2.30258500 |
| H   | -3.85995100 | -0.93963200 | -2.06364100 |
| H   | -4.29007100 | -1.81165600 | -0.59569400 |

---

|   |             |             |             |
|---|-------------|-------------|-------------|
| C | -2.37703700 | 2.31882500  | -1.26377700 |
| H | -2.08327500 | 0.53973100  | -2.47861900 |
| H | -0.59121800 | 1.20766700  | -1.82537800 |
| N | 0.43565200  | -1.86825500 | 0.40271100  |
| C | 0.89271700  | 0.49963800  | 0.70581400  |
| C | -3.86259600 | -0.44400200 | 3.25402600  |
| H | -3.08429200 | -1.84166900 | 1.80481400  |
| H | -1.85131300 | -0.86181500 | 2.59358500  |
| C | -5.41093800 | -3.13268100 | -2.72486800 |
| H | -3.69296300 | -3.97343900 | -1.72063300 |
| H | -3.30089500 | -3.09188700 | -3.18816500 |
| C | -2.17641800 | 3.36033500  | -2.36279000 |
| H | -3.44925600 | 2.12129500  | -1.13459800 |
| H | -2.00909900 | 2.72960000  | -0.31684500 |
| C | 0.89781900  | -2.52082200 | 1.62096900  |
| C | 1.03926700  | -2.40350900 | -0.71120500 |
| C | 0.39136800  | 1.89022200  | 0.83315000  |
| C | -3.84722800 | -1.42439500 | 4.42180500  |
| H | -4.86887400 | -0.39574000 | 2.82012300  |
| H | -3.62864700 | 0.56631100  | 3.61192500  |
| H | -6.07205000 | -3.15119800 | -1.85239300 |
| H | -5.67841900 | -2.25860500 | -3.32735000 |
| H | -5.61966300 | -4.02482500 | -3.32080400 |
| C | -2.87237300 | 4.67601500  | -2.03367600 |
| H | -2.54529100 | 2.96551400  | -3.31769600 |
| H | -1.10020300 | 3.53209300  | -2.48848200 |
| C | 1.82495400  | -3.61193600 | 1.05344100  |
| H | 1.45046600  | -1.81951400 | 2.24955400  |
| H | 0.05337800  | -2.93723200 | 2.18081900  |
| O | 1.72723600  | -3.50555600 | -0.37354300 |



---

|   |             |             |             |
|---|-------------|-------------|-------------|
| O | 0.91972900  | -2.01132800 | -1.85157000 |
| C | 0.79477700  | 2.89811300  | -0.05475400 |
| C | -0.42710600 | 2.23979900  | 1.91554000  |
| H | -2.85622300 | -1.46743400 | 4.88439700  |
| H | -4.10486900 | -2.43520200 | 4.08968100  |
| H | -4.56415400 | -1.13356700 | 5.19387400  |
| H | -2.48926300 | 5.08787700  | -1.09415100 |
| H | -2.71252800 | 5.41983500  | -2.81870600 |
| H | -3.95228300 | 4.53449400  | -1.92086100 |
| H | 1.51932100  | -4.62133400 | 1.33451300  |
| H | 2.86239700  | -3.43216100 | 1.33558700  |
| C | 0.33785300  | 4.20223700  | 0.10497500  |
| H | 1.47800400  | 2.64400100  | -0.85701400 |
| C | -0.86824200 | 3.55152200  | 2.08622000  |
| H | -0.69481300 | 1.47592000  | 2.64206800  |
| C | -0.49610600 | 4.53475500  | 1.17378500  |
| H | 0.64709400  | 4.96895100  | -0.59938400 |
| H | -1.49476600 | 3.80342500  | 2.93662700  |
| H | -0.83737000 | 5.55734800  | 1.30206300  |
| B | 2.51205600  | 0.29614400  | 1.08125900  |
| O | 3.31457000  | 1.31698100  | 0.39009400  |
| O | 3.01539300  | -1.00109100 | 0.58233000  |
| H | 2.56788900  | 0.42203500  | 2.31111300  |
| C | 4.06373200  | 0.67716900  | -0.62833900 |
| C | 5.35950200  | 1.45103500  | -0.84252800 |
| H | 6.02305000  | 0.93172900  | -1.54328100 |
| H | 5.13431400  | 2.43848700  | -1.25792700 |
| H | 5.88788200  | 1.59820500  | 0.10166500  |
| C | 3.25392600  | 0.65921000  | -1.93024400 |
| H | 3.82291900  | 0.23214700  | -2.76302000 |

---

|       |             |             |             |
|-------|-------------|-------------|-------------|
| H     | 2.33554100  | 0.07479000  | -1.80930700 |
| H     | 2.99335300  | 1.68807800  | -2.20092800 |
| C     | 4.25691000  | -0.76232300 | -0.05872700 |
| C     | 5.36841600  | -0.80931300 | 0.99455300  |
| H     | 5.31415900  | -1.76778500 | 1.52051700  |
| H     | 6.36536600  | -0.71761800 | 0.55102800  |
| H     | 5.23275900  | -0.00900300 | 1.72806800  |
| C     | 4.48559800  | -1.83880400 | -1.11202000 |
| H     | 3.62070000  | -1.92849000 | -1.77323800 |
| H     | 5.37618500  | -1.61954300 | -1.71235500 |
| H     | 4.63798800  | -2.80878900 | -0.62673900 |
| TS2R' |             |             |             |
| P     | -1.64287300 | -0.37970500 | -0.10961500 |
| C     | -2.48094900 | -1.96148300 | 0.23452500  |
| C     | -2.60097600 | 0.91383000  | 0.76332000  |
| C     | -3.99003700 | -1.93523800 | -0.01677600 |
| H     | -1.99476700 | -2.69890300 | -0.41317600 |
| H     | -2.25471600 | -2.23536300 | 1.27118600  |
| C     | -1.78950900 | -0.05788200 | -1.91533500 |
| C     | 0.03761800  | -0.52705000 | 0.42298600  |
| C     | -2.62563700 | 0.71351700  | 2.27799900  |
| H     | -2.17048700 | 1.88916300  | 0.51318200  |
| H     | -3.61614700 | 0.89656400  | 0.34877300  |
| C     | -4.61535600 | -3.32043700 | 0.14857500  |
| H     | -4.19541800 | -1.56834000 | -1.03195400 |
| H     | -4.47735000 | -1.23641400 | 0.67518100  |
| C     | -2.78771200 | 1.01724200  | -2.34568900 |
| H     | -2.00933200 | -1.02452500 | -2.38160700 |
| H     | -0.77419800 | 0.19896200  | -2.24050400 |
| N     | 0.50543400  | -1.87170600 | 0.53392100  |

---

|   |             |             |             |
|---|-------------|-------------|-------------|
| C | 0.96157900  | 0.49831400  | 0.20429400  |
| C | -3.32866000 | 1.86894300  | 2.98833000  |
| H | -3.13043900 | -0.23037800 | 2.52569600  |
| H | -1.59654400 | 0.62517000  | 2.64665100  |
| C | -6.12225000 | -3.30732000 | -0.08495700 |
| H | -4.39783000 | -3.69340500 | 1.15697600  |
| H | -4.13546800 | -4.01565500 | -0.55032700 |
| C | -2.74438600 | 1.25127400  | -3.85554000 |
| H | -3.80718000 | 0.73340600  | -2.05233400 |
| H | -2.56404900 | 1.96054400  | -1.83140800 |
| C | 1.28685000  | -2.34665000 | 1.66046500  |
| C | 0.67455300  | -2.65877300 | -0.56996900 |
| C | 0.47258600  | 1.90738500  | 0.27537600  |
| C | -3.31535000 | 1.71053700  | 4.50481500  |
| H | -4.36264500 | 1.94174900  | 2.62864400  |
| H | -2.83341800 | 2.80633700  | 2.70596500  |
| H | -6.62429700 | -2.63869200 | 0.62179700  |
| H | -6.35954500 | -2.96188900 | -1.09629600 |
| H | -6.55233400 | -4.30499900 | 0.03612000  |
| C | -3.72368900 | 2.33165700  | -4.30230300 |
| H | -2.96251100 | 0.31020400  | -4.37489100 |
| H | -1.72368300 | 1.53263300  | -4.14288800 |
| C | 1.99087600  | -3.57232300 | 1.04842000  |
| H | 2.00704000  | -1.58598500 | 1.97214300  |
| H | 0.64065200  | -2.60618600 | 2.50654300  |
| O | 1.43317000  | -3.73099000 | -0.26243400 |
| O | 0.16161300  | -2.49866700 | -1.65817700 |
| C | 0.14900600  | 2.67062200  | -0.84995000 |
| C | 0.29138300  | 2.47226500  | 1.54570600  |
| H | -2.28876100 | 1.67333300  | 4.88364300  |

---

|   |             |             |             |
|---|-------------|-------------|-------------|
| H | -3.81564800 | 0.78541100  | 4.80936300  |
| H | -3.82410300 | 2.54299600  | 4.99832800  |
| H | -3.50237200 | 3.28655600  | -3.81430800 |
| H | -3.67756400 | 2.49013500  | -5.38304500 |
| H | -4.75332000 | 2.05940000  | -4.04817200 |
| H | 1.80906100  | -4.49257300 | 1.60647400  |
| H | 3.06491900  | -3.41102900 | 0.94047600  |
| C | -0.37288400 | 3.95732500  | -0.70888200 |
| H | 0.30057100  | 2.24725400  | -1.83888300 |
| C | -0.22768900 | 3.75425600  | 1.68597100  |
| H | 0.56188600  | 1.89048300  | 2.42244400  |
| C | -0.57432100 | 4.49858300  | 0.55696100  |
| H | -0.62623800 | 4.53250600  | -1.59456900 |
| H | -0.36063300 | 4.17577700  | 2.67805100  |
| H | -0.98654800 | 5.49665000  | 0.66618900  |
| B | 2.45461900  | 0.30458100  | -0.17394400 |
| O | 3.11677100  | -0.96325700 | -0.21223200 |
| O | 3.41358100  | 1.33568600  | 0.01546200  |
| H | 1.65245100  | 0.49849700  | -1.26737800 |
| C | 4.50679700  | -0.71407300 | 0.01932800  |
| C | 5.32921500  | -1.69918500 | -0.79756300 |
| H | 6.39819500  | -1.47008500 | -0.72910500 |
| H | 5.17723100  | -2.71526700 | -0.41961800 |
| H | 5.02989300  | -1.68440200 | -1.84711100 |
| C | 4.78448500  | -0.89986000 | 1.51253200  |
| H | 5.84767200  | -0.78892200 | 1.74725000  |
| H | 4.21879100  | -0.17028300 | 2.10063200  |
| H | 4.47688800  | -1.90525000 | 1.81680600  |
| C | 4.65841300  | 0.78074100  | -0.40830000 |
| C | 4.77043700  | 0.93309100  | -1.92674900 |

---

|       |             |             |             |
|-------|-------------|-------------|-------------|
| H     | 4.64307200  | 1.98875700  | -2.18243100 |
| H     | 5.74385100  | 0.60031000  | -2.29989700 |
| H     | 3.98680000  | 0.36224500  | -2.43426300 |
| C     | 5.78997400  | 1.53058300  | 0.27822800  |
| H     | 5.63670500  | 1.57337100  | 1.35834800  |
| H     | 6.75616300  | 1.05620000  | 0.07561100  |
| H     | 5.83037800  | 2.55703800  | -0.09766400 |
| TS2S' |             |             |             |
| P     | -1.73696600 | -0.26865900 | -0.03761200 |
| C     | -2.38563300 | -1.80875100 | -0.77202900 |
| C     | -2.37179200 | -0.18988400 | 1.68386900  |
| C     | -3.90310300 | -1.86804800 | -0.94985800 |
| H     | -1.87552000 | -1.91057100 | -1.73659500 |
| H     | -2.03626000 | -2.63816500 | -0.14624100 |
| C     | -2.51767600 | 1.11769600  | -0.95340500 |
| C     | 0.01072100  | -0.37601100 | -0.16881600 |
| C     | -1.65964300 | -1.18269700 | 2.60326500  |
| H     | -2.22051100 | 0.83553600  | 2.03835800  |
| H     | -3.45461600 | -0.36560100 | 1.66657800  |
| C     | -4.34758300 | -3.21070200 | -1.53143200 |
| H     | -4.23311800 | -1.06303800 | -1.61831800 |
| H     | -4.40945500 | -1.70865400 | 0.01120900  |
| C     | -3.84888100 | 1.63418000  | -0.40017900 |
| H     | -2.62493300 | 0.75902800  | -1.98520600 |
| H     | -1.79362600 | 1.93514000  | -0.98308900 |
| N     | 0.51290300  | -1.64677300 | -0.57964700 |
| C     | 0.91926000  | 0.64225200  | 0.16162200  |
| C     | -2.16501900 | -1.10415100 | 4.04320400  |
| H     | -1.79691800 | -2.20568000 | 2.22615800  |
| H     | -0.58002800 | -0.98362700 | 2.57989300  |

---

|   |             |             |             |
|---|-------------|-------------|-------------|
| C | -5.85756500 | -3.28315700 | -1.73158200 |
| H | -4.02130700 | -4.01753600 | -0.86385000 |
| H | -3.83648200 | -3.37297700 | -2.48791300 |
| C | -4.42337000 | 2.73807700  | -1.28805800 |
| H | -4.58192000 | 0.82307300  | -0.30721100 |
| H | -3.69219500 | 2.03497200  | 0.60868500  |
| C | 0.92912700  | -2.65694800 | 0.38430900  |
| C | 1.23984300  | -1.74447500 | -1.74524600 |
| C | 0.43056400  | 2.04877400  | 0.25964900  |
| C | -1.44870600 | -2.08956800 | 4.96063900  |
| H | -3.24509300 | -1.29584700 | 4.06056000  |
| H | -2.02483300 | -0.08162400 | 4.41519300  |
| H | -6.38699200 | -3.14891300 | -0.78272500 |
| H | -6.20054600 | -2.50227800 | -2.41782600 |
| H | -6.15794100 | -4.24833800 | -2.14766400 |
| C | -5.73160400 | 3.30003400  | -0.74197900 |
| H | -4.58077800 | 2.34259800  | -2.29914200 |
| H | -3.68074100 | 3.54019500  | -1.37933400 |
| C | 1.91980200  | -3.49654100 | -0.44044300 |
| H | 1.41853900  | -2.18926800 | 1.24268400  |
| H | 0.07218200  | -3.24697600 | 0.73110000  |
| O | 1.98421500  | -2.87509300 | -1.72573400 |
| O | 1.21702200  | -0.99450200 | -2.69071900 |
| C | 0.54709800  | 2.85409900  | -0.88080100 |
| C | -0.16960200 | 2.57646900  | 1.40358700  |
| H | -0.37142000 | -1.89669900 | 4.97615200  |
| H | -1.59768200 | -3.12015000 | 4.62229300  |
| H | -1.81674300 | -2.01877300 | 5.98762200  |
| H | -5.58841600 | 3.72756400  | 0.25562300  |
| H | -6.12795100 | 4.08737800  | -1.38868400 |

---

|   |             |             |             |
|---|-------------|-------------|-------------|
| H | -6.49362400 | 2.51777000  | -0.66278100 |
| H | 1.58933900  | -4.52887900 | -0.57777800 |
| H | 2.91959100  | -3.48419800 | -0.00267700 |
| C | 0.02916200  | 4.14375700  | -0.88740600 |
| H | 1.02964300  | 2.44209600  | -1.76288700 |
| C | -0.68749800 | 3.87319300  | 1.39876300  |
| H | -0.21756200 | 1.96676800  | 2.30287200  |
| C | -0.59973000 | 4.65370700  | 0.25084200  |
| H | 0.11843000  | 4.75664600  | -1.77908200 |
| H | -1.15317400 | 4.27203600  | 2.29494100  |
| H | -1.00403800 | 5.66111000  | 0.24430000  |
| B | 2.43319800  | 0.44082000  | 0.37054700  |
| O | 3.37721700  | 1.49841700  | 0.30534100  |
| O | 3.08133400  | -0.80399000 | 0.13301400  |
| H | 1.66785000  | 0.49153900  | 1.55199100  |
| C | 4.54027000  | 0.94811400  | -0.31719000 |
| C | 5.76564400  | 1.71413000  | 0.15548100  |
| H | 6.68529200  | 1.25360100  | -0.22119100 |
| H | 5.72333300  | 2.74158900  | -0.21745900 |
| H | 5.81035500  | 1.75209300  | 1.24588400  |
| C | 4.37015500  | 1.08505100  | -1.83215700 |
| H | 5.26097600  | 0.75732100  | -2.37722100 |
| H | 3.51124700  | 0.50015500  | -2.17969700 |
| H | 4.18905800  | 2.13763300  | -2.06839400 |
| C | 4.48804200  | -0.54396500 | 0.13625500  |
| C | 5.00248200  | -0.73276200 | 1.56302500  |
| H | 4.73099500  | -1.73593700 | 1.90583700  |
| H | 6.09059200  | -0.63196100 | 1.62246900  |
| H | 4.54358200  | -0.00381200 | 2.23799400  |
| C | 5.16654900  | -1.51916700 | -0.81393600 |

---

|     |             |             |             |
|-----|-------------|-------------|-------------|
| H   | 4.65023000  | -1.54692900 | -1.77552500 |
| H   | 6.21406700  | -1.24243700 | -0.97559700 |
| H   | 5.15109600  | -2.52867500 | -0.39052100 |
| MSR |             |             |             |
| P   | -1.36627200 | -0.36404300 | -0.18897500 |
| C   | -2.68804100 | -1.62713600 | -0.26456500 |
| C   | -1.95320500 | 0.92362800  | 0.98106300  |
| C   | -4.08822300 | -1.05781900 | -0.50049200 |
| H   | -2.41010800 | -2.30015700 | -1.08251700 |
| H   | -2.64806600 | -2.20169600 | 0.66743300  |
| C   | -1.40892300 | 0.45767600  | -1.85692700 |
| C   | 0.05975000  | -1.15938100 | 0.42147700  |
| C   | -2.32323100 | 0.42671400  | 2.37770400  |
| H   | -1.18141000 | 1.69934900  | 1.02988000  |
| H   | -2.82528400 | 1.39023100  | 0.50858800  |
| C   | -5.13951500 | -2.16242700 | -0.61022000 |
| H   | -4.09750700 | -0.46224700 | -1.42292700 |
| H   | -4.36701800 | -0.37790400 | 0.31571700  |
| C   | -2.12387800 | 1.80453200  | -1.95881000 |
| H   | -1.82973400 | -0.27664500 | -2.55056700 |
| H   | -0.36155800 | 0.58789100  | -2.13827500 |
| N   | 0.24949000  | -2.49808800 | -0.09172200 |
| C   | 1.39293300  | -0.44577300 | 0.71032700  |
| C   | -2.97821000 | 1.52812500  | 3.21179000  |
| H   | -3.01747900 | -0.42246300 | 2.30227200  |
| H   | -1.43592500 | 0.05074700  | 2.89456200  |
| C   | -6.54066400 | -1.60919200 | -0.84780800 |
| H   | -5.12713400 | -2.76175000 | 0.30860500  |
| H   | -4.86315600 | -2.84013700 | -1.42673900 |
| C   | -1.97609500 | 2.41903600  | -3.35053500 |



---

|   |             |             |             |
|---|-------------|-------------|-------------|
| H | -3.19189400 | 1.69977800  | -1.72411600 |
| H | -1.70424300 | 2.49943100  | -1.22195900 |
| C | 0.84698100  | -3.54845900 | 0.72438900  |
| C | 0.19434800  | -2.87569000 | -1.39760700 |
| C | 2.53345600  | -0.89873500 | -0.20389900 |
| C | -3.33568300 | 1.05247400  | 4.61614200  |
| H | -3.88015300 | 1.88722000  | 2.69948100  |
| H | -2.29618000 | 2.38572200  | 3.27446900  |
| H | -6.84721700 | -0.94975300 | -0.02928000 |
| H | -6.58087600 | -1.02899700 | -1.77532800 |
| H | -7.27905600 | -2.41183000 | -0.92423900 |
| C | -2.67148700 | 3.77204200  | -3.46319800 |
| H | -2.37925000 | 1.72763200  | -4.10059300 |
| H | -0.90751600 | 2.52823400  | -3.57825000 |
| C | 1.46291600  | -4.43434600 | -0.35859500 |
| H | 1.60101300  | -3.14387100 | 1.40626200  |
| H | 0.08149600  | -4.07016400 | 1.31407300  |
| O | 0.71856400  | -4.11880500 | -1.54474700 |
| O | -0.30679400 | -2.26655200 | -2.32392500 |
| C | 3.68783200  | -1.46805000 | 0.34376400  |
| C | 2.44312600  | -0.77666100 | -1.59542800 |
| H | -2.44396000 | 0.71130500  | 5.15126800  |
| H | -4.04030400 | 0.21516800  | 4.57825700  |
| H | -3.79695000 | 1.85018900  | 5.20484000  |
| H | -2.27205300 | 4.48108700  | -2.72958200 |
| H | -2.54161100 | 4.20982900  | -4.45674300 |
| H | -3.74643700 | 3.67716500  | -3.27780300 |
| H | 1.36618600  | -5.50266100 | -0.16474700 |
| H | 2.51445000  | -4.17996200 | -0.53024400 |
| C | 4.72913400  | -1.89650500 | -0.47841100 |

---

|   |             |             |             |
|---|-------------|-------------|-------------|
| H | 3.74437700  | -1.60623900 | 1.42102600  |
| C | 3.47870500  | -1.21113200 | -2.41754800 |
| H | 1.53446300  | -0.37484100 | -2.03480700 |
| C | 4.62938700  | -1.76785100 | -1.86158200 |
| H | 5.61569100  | -2.34067700 | -0.03529700 |
| H | 3.38265600  | -1.12123800 | -3.49530500 |
| H | 5.43627400  | -2.10868700 | -2.50290900 |
| B | 1.47209700  | 1.12107500  | 0.59554500  |
| O | 0.81429800  | 1.86847900  | -0.35814900 |
| O | 2.31804600  | 1.87834500  | 1.36294400  |
| C | 1.49492200  | 3.14637000  | -0.42799900 |
| C | 0.49043700  | 4.22949900  | -0.77973500 |
| H | 0.96581300  | 5.21523900  | -0.75107800 |
| H | 0.11382200  | 4.06582200  | -1.79426300 |
| H | -0.35872900 | 4.23161900  | -0.09216800 |
| C | 2.54935100  | 3.01515500  | -1.52364600 |
| H | 3.07739700  | 3.95879800  | -1.68653400 |
| H | 3.28037600  | 2.23892800  | -1.27670200 |
| H | 2.05524800  | 2.72846700  | -2.45630000 |
| C | 2.11542800  | 3.26318000  | 1.00207200  |
| C | 1.14950600  | 3.85320000  | 2.02605200  |
| H | 1.56801300  | 3.71520700  | 3.02609400  |
| H | 0.99117700  | 4.92240500  | 1.85999900  |
| H | 0.17925900  | 3.34713600  | 1.99293100  |
| C | 3.45027700  | 3.98715700  | 1.05560400  |
| H | 4.20428500  | 3.47736000  | 0.45367200  |
| H | 3.34478400  | 5.01539800  | 0.69511600  |
| H | 3.80590900  | 4.02365400  | 2.08867900  |
| O | -0.07957000 | -1.83950100 | 3.16543700  |
| H | 1.64899800  | -2.17267600 | 3.47362300  |

---

|      |             |             |             |
|------|-------------|-------------|-------------|
| H    | -0.71147600 | -2.55042800 | 3.32126300  |
| O    | 2.62157100  | -2.26818200 | 3.52742700  |
| H    | 2.92630300  | -1.38697200 | 3.77015200  |
| H    | -0.20850200 | -1.57341700 | 2.19972600  |
| H    | 1.72302900  | -0.70178200 | 1.72806900  |
| TS3R |             |             |             |
| P    | -1.38883800 | -0.31360900 | -0.20306400 |
| C    | -2.72254800 | -1.55107500 | -0.30768300 |
| C    | -1.91624400 | 0.91902000  | 1.04617300  |
| C    | -4.07875300 | -0.95996400 | -0.70263100 |
| H    | -2.40030600 | -2.29171100 | -1.04631000 |
| H    | -2.77152800 | -2.05016000 | 0.66728100  |
| C    | -1.31080700 | 0.52372100  | -1.84170600 |
| C    | 0.04096300  | -1.18012400 | 0.47809000  |
| C    | -2.51015300 | 0.33359400  | 2.33160300  |
| H    | -1.03758800 | 1.53359100  | 1.27121400  |
| H    | -2.63907400 | 1.58316700  | 0.56060100  |
| C    | -5.18352700 | -2.01631100 | -0.67389500 |
| H    | -4.01395600 | -0.53306900 | -1.71176400 |
| H    | -4.35227800 | -0.13681400 | -0.02923800 |
| C    | -2.01805100 | 1.87507800  | -1.92863200 |
| H    | -1.71425200 | -0.19328200 | -2.56145800 |
| H    | -0.25225300 | 0.64523600  | -2.07562900 |
| N    | 0.21467400  | -2.49745400 | -0.09953300 |
| C    | 1.39782800  | -0.45186800 | 0.72194500  |
| C    | -2.83709600 | 1.43807800  | 3.33732000  |
| H    | -3.43205900 | -0.21554200 | 2.09575900  |
| H    | -1.80686600 | -0.37831600 | 2.78211200  |
| C    | -6.53511500 | -1.45241800 | -1.09874500 |
| H    | -5.25445400 | -2.43069000 | 0.33927300  |

---

|   |             |             |             |
|---|-------------|-------------|-------------|
| H | -4.90233400 | -2.84732800 | -1.33178400 |
| C | -1.85525500 | 2.50086600  | -3.31322200 |
| H | -3.08794800 | 1.76854200  | -1.70351900 |
| H | -1.59878400 | 2.55659200  | -1.18006300 |
| C | 0.76788200  | -3.59634600 | 0.68827000  |
| C | 0.21384000  | -2.79313600 | -1.42564200 |
| C | 2.53176000  | -0.95964300 | -0.16268900 |
| C | -3.44238800 | 0.87634700  | 4.61975400  |
| H | -3.52533300 | 2.16458800  | 2.88536300  |
| H | -1.91705400 | 1.98615800  | 3.57669300  |
| H | -6.84471300 | -0.63507100 | -0.43937800 |
| H | -6.49313300 | -1.05959100 | -2.11968100 |
| H | -7.31361600 | -2.21921300 | -1.06787900 |
| C | -2.55320400 | 3.85286200  | -3.41970600 |
| H | -2.24940400 | 1.81570000  | -4.07357300 |
| H | -0.78453300 | 2.61438600  | -3.52779500 |
| C | 1.40420400  | -4.43761800 | -0.42075400 |
| H | 1.49606500  | -3.23599000 | 1.41971600  |
| H | -0.02830600 | -4.13062400 | 1.21914700  |
| O | 0.73523900  | -4.02303700 | -1.62578600 |
| O | -0.24117200 | -2.11414900 | -2.32716500 |
| C | 3.59729400  | -1.65718900 | 0.41798800  |
| C | 2.53677900  | -0.75467100 | -1.54705500 |
| H | -2.75663600 | 0.16508200  | 5.09016500  |
| H | -4.37968900 | 0.34915400  | 4.41311400  |
| H | -3.65711800 | 1.66823700  | 5.34271300  |
| H | -2.16532800 | 4.55570300  | -2.67428000 |
| H | -2.41169400 | 4.30022800  | -4.40717200 |
| H | -3.63001200 | 3.75246500  | -3.24929800 |
| H | 1.25383600  | -5.51026900 | -0.29939100 |

---

|   |             |             |             |
|---|-------------|-------------|-------------|
| H | 2.47140300  | -4.21971400 | -0.53027200 |
| C | 4.64280000  | -2.13612400 | -0.36953800 |
| H | 3.57321700  | -1.84555400 | 1.48967800  |
| C | 3.57602300  | -1.24302600 | -2.33496900 |
| H | 1.70583900  | -0.23334500 | -2.01437500 |
| C | 4.63504400  | -1.93198500 | -1.74784600 |
| H | 5.46148600  | -2.67727100 | 0.09567100  |
| H | 3.55544000  | -1.08728900 | -3.40918700 |
| H | 5.44581700  | -2.31165900 | -2.36186200 |
| B | 1.50610900  | 1.11430300  | 0.61304700  |
| O | 0.84419900  | 1.89225200  | -0.31362600 |
| O | 2.38429100  | 1.83877300  | 1.37277800  |
| C | 1.54767000  | 3.16053900  | -0.37059500 |
| C | 0.55869300  | 4.27011900  | -0.68042100 |
| H | 1.05353900  | 5.24532300  | -0.63089000 |
| H | 0.16710100  | 4.14263400  | -1.69457600 |
| H | -0.28118600 | 4.26967300  | 0.01833500  |
| C | 2.57961100  | 3.03359100  | -1.48770500 |
| H | 3.12330500  | 3.97046400  | -1.63714900 |
| H | 3.29961900  | 2.23821100  | -1.27138400 |
| H | 2.06469100  | 2.78100300  | -2.41906400 |
| C | 2.19642500  | 3.23486800  | 1.04895800  |
| C | 1.25838200  | 3.81426700  | 2.10424900  |
| H | 1.69123300  | 3.64277600  | 3.09281800  |
| H | 1.11664600  | 4.89004200  | 1.96831800  |
| H | 0.27850500  | 3.32696500  | 2.07543900  |
| C | 3.54291600  | 3.93717800  | 1.09391500  |
| H | 4.27776000  | 3.43077400  | 0.46604500  |
| H | 3.44638300  | 4.97528000  | 0.76017300  |
| H | 3.91779200  | 3.94319600  | 2.12068500  |

---

|     |             |             |             |
|-----|-------------|-------------|-------------|
| O   | -0.25962300 | -1.81905100 | 3.00003000  |
| H   | 1.21081300  | -2.17550900 | 3.32729900  |
| H   | -0.79643600 | -2.61494200 | 3.09850100  |
| O   | 2.20660500  | -2.37250600 | 3.43349400  |
| H   | 2.54740700  | -1.61156800 | 3.91493700  |
| H   | -0.28686600 | -1.44596900 | 1.65889800  |
| H   | 1.67997900  | -0.71990200 | 1.74768400  |
| M6R |             |             |             |
| P   | 1.41763300  | 0.26142300  | -0.22035700 |
| C   | 2.77181400  | 1.47277400  | -0.33983000 |
| C   | 1.90686400  | -0.95135700 | 1.05990300  |
| C   | 4.12145100  | 0.84435200  | -0.69809800 |
| H   | 2.47178400  | 2.19627600  | -1.10437600 |
| H   | 2.81576800  | 1.99915100  | 0.62106000  |
| C   | 1.29623600  | -0.59227800 | -1.84220800 |
| C   | -0.00526000 | 1.17785500  | 0.46531000  |
| C   | 2.46038800  | -0.33308400 | 2.34865500  |
| H   | 1.02062900  | -1.56063100 | 1.26989200  |
| H   | 2.64281000  | -1.62337700 | 0.60523800  |
| C   | 5.23642700  | 1.88973400  | -0.73396000 |
| H   | 4.05214100  | 0.35754500  | -1.67960000 |
| H   | 4.38546800  | 0.06127000  | 0.02479400  |
| C   | 1.96647700  | -1.96429200 | -1.90269900 |
| H   | 1.71673400  | 0.10100400  | -2.57523300 |
| H   | 0.23324400  | -0.68667500 | -2.06716200 |
| N   | -0.13018200 | 2.49765200  | -0.11535300 |
| C   | -1.38696400 | 0.48821700  | 0.69666000  |
| C   | 2.73450800  | -1.40798700 | 3.40096700  |
| H   | 3.39708300  | 0.19764700  | 2.12899200  |
| H   | 1.74979200  | 0.39958500  | 2.75851100  |

---

|   |             |             |             |
|---|-------------|-------------|-------------|
| C | 6.58345800  | 1.28589100  | -1.11598400 |
| H | 5.30815100  | 2.36883800  | 0.25004700  |
| H | 4.96552200  | 2.67839100  | -1.44597800 |
| C | 1.75993500  | -2.62408200 | -3.26524500 |
| H | 3.04278500  | -1.87807700 | -1.70072500 |
| H | 1.54422500  | -2.61296300 | -1.12730600 |
| C | -0.64790200 | 3.61643700  | 0.66877100  |
| C | -0.13264000 | 2.77485700  | -1.44488500 |
| C | -2.49454700 | 1.02485300  | -0.20340600 |
| C | 3.26947400  | -0.80121000 | 4.69412500  |
| H | 3.44389600  | -2.14931400 | 3.00962600  |
| H | 1.80158400  | -1.94659500 | 3.61008200  |
| H | 6.88312100  | 0.51068700  | -0.40338500 |
| H | 6.54088200  | 0.82763200  | -2.10925700 |
| H | 7.36917500  | 2.04568000  | -1.13247500 |
| C | 2.43336200  | -3.98987200 | -3.35032000 |
| H | 2.14601500  | -1.96694900 | -4.05388700 |
| H | 0.68232600  | -2.72561900 | -3.44957000 |
| C | -1.25110400 | 4.47573500  | -0.44701200 |
| H | -1.38849400 | 3.28264500  | 1.40073900  |
| H | 0.16654600  | 4.12123100  | 1.19945000  |
| O | -0.61614300 | 4.01581800  | -1.65585700 |
| O | 0.29176400  | 2.06536300  | -2.33814400 |
| C | -3.52517200 | 1.78617000  | 0.36060800  |
| C | -2.51313200 | 0.78062100  | -1.58112200 |
| H | 2.55933900  | -0.07166400 | 5.09534200  |
| H | 4.21884100  | -0.28335700 | 4.52153000  |
| H | 3.43986400  | -1.56584000 | 5.45713800  |
| H | 2.05517600  | -4.66443600 | -2.57445100 |
| H | 2.25803900  | -4.46294000 | -4.32016800 |

---

|   |             |             |             |
|---|-------------|-------------|-------------|
| H | 3.51581300  | -3.90218800 | -3.21192100 |
| H | -1.04488300 | 5.54049300  | -0.33959200 |
| H | -2.32852300 | 4.31195300  | -0.54657400 |
| C | -4.54905200 | 2.29062400  | -0.43923600 |
| H | -3.48766800 | 2.00018800  | 1.42748800  |
| C | -3.53017500 | 1.29565800  | -2.38118900 |
| H | -1.71181100 | 0.20415900  | -2.03515900 |
| C | -4.55400800 | 2.04901100  | -1.81157000 |
| H | -5.34148500 | 2.88073100  | 0.01175100  |
| H | -3.52040900 | 1.10875600  | -3.45053600 |
| H | -5.34809700 | 2.44862000  | -2.43468200 |
| B | -1.53466500 | -1.07599400 | 0.61027100  |
| O | -0.87658500 | -1.88645900 | -0.29147800 |
| O | -2.44403200 | -1.76377200 | 1.36597500  |
| C | -1.61001700 | -3.13900300 | -0.33597500 |
| C | -0.64442100 | -4.27800400 | -0.61031300 |
| H | -1.16346600 | -5.23967500 | -0.54580700 |
| H | -0.23879600 | -4.18189000 | -1.62245400 |
| H | 0.18705300  | -4.28294300 | 0.09843900  |
| C | -2.62240300 | -3.00826000 | -1.47029600 |
| H | -3.18577300 | -3.93491700 | -1.61025100 |
| H | -3.32666700 | -2.19264500 | -1.27877800 |
| H | -2.08860700 | -2.78585600 | -2.39881300 |
| C | -2.28070700 | -3.17013800 | 1.07446300  |
| C | -1.36908200 | -3.74543000 | 2.15474500  |
| H | -1.81104600 | -3.54369900 | 3.13346200  |
| H | -1.24766700 | -4.82652300 | 2.04356100  |
| H | -0.37923000 | -3.27832700 | 2.12872800  |
| C | -3.64181800 | -3.84370100 | 1.11413500  |
| H | -4.35674900 | -3.33633800 | 0.46445000  |



---

|      |             |             |             |
|------|-------------|-------------|-------------|
| H    | -3.56182500 | -4.89068000 | 0.80458100  |
| H    | -4.03163700 | -3.81946600 | 2.13502200  |
| O    | 0.26634700  | 1.82249400  | 3.09399300  |
| H    | -1.13072600 | 2.20359700  | 3.29216400  |
| H    | 0.80308000  | 2.61233700  | 3.23234400  |
| O    | -2.15013900 | 2.44397300  | 3.32928700  |
| H    | -2.54056900 | 1.74536600  | 3.86440500  |
| H    | 0.33603800  | 1.39737500  | 1.55351900  |
| H    | -1.66034400 | 0.78361200  | 1.71709000  |
| TS4R |             |             |             |
| P    | -1.37991000 | 0.34215400  | -0.28611300 |
| C    | -3.11109300 | -0.23644400 | -0.30707100 |
| C    | -1.40535900 | 1.91123000  | 0.64049500  |
| C    | -4.10604400 | 0.78307700  | -0.87048900 |
| H    | -3.13733000 | -1.15917400 | -0.89033800 |
| H    | -3.35932600 | -0.48864100 | 0.73134300  |
| C    | -0.75233400 | 0.61292400  | -1.97153300 |
| C    | -0.28475200 | -0.83130600 | 0.68762400  |
| C    | -2.07611900 | 1.76728900  | 2.01508100  |
| H    | -0.35861600 | 2.20553100  | 0.75663400  |
| H    | -1.90780000 | 2.66859100  | 0.02866600  |
| C    | -5.54455400 | 0.27813100  | -0.75133000 |
| H    | -3.87899500 | 0.97462500  | -1.92655900 |
| H    | -4.01893700 | 1.74274000  | -0.34568400 |
| C    | -1.01027900 | 1.99918300  | -2.56589000 |
| H    | -1.16569900 | -0.19443300 | -2.58504400 |
| H    | 0.32609200  | 0.42904900  | -1.90493400 |
| N    | -0.95252400 | -2.11246900 | 0.79273400  |
| C    | 1.20920300  | -0.93013400 | 0.31199100  |
| C    | -1.68909900 | 2.91234200  | 2.95021400  |

---

|   |             |             |             |
|---|-------------|-------------|-------------|
| H | -3.16732000 | 1.73211200  | 1.89606200  |
| H | -1.76509200 | 0.83762700  | 2.50779100  |
| C | -6.55298500 | 1.26501300  | -1.32969700 |
| H | -5.77024900 | 0.09106000  | 0.30576300  |
| H | -5.63033200 | -0.68709800 | -1.26428500 |
| C | -0.42773900 | 2.11365100  | -3.97440800 |
| H | -2.08465200 | 2.21801000  | -2.59618300 |
| H | -0.55163500 | 2.76284700  | -1.92683400 |
| C | -1.07381600 | -2.86828700 | 2.03324600  |
| C | -1.29214400 | -2.85122200 | -0.29682700 |
| C | 1.61299000  | -2.07205900 | -0.58031900 |
| C | -2.26923100 | 2.71378900  | 4.34580400  |
| H | -2.01460000 | 3.87139700  | 2.52684200  |
| H | -0.59519900 | 2.94382200  | 3.01682900  |
| H | -6.50024400 | 2.22897300  | -0.81341000 |
| H | -6.36135500 | 1.44472200  | -2.39237900 |
| H | -7.57536300 | 0.89027500  | -1.23377400 |
| C | -0.59112200 | 3.51504200  | -4.55265400 |
| H | -0.91175500 | 1.37750300  | -4.62711200 |
| H | 0.63633700  | 1.84662000  | -3.94381000 |
| C | -1.31095200 | -4.27996400 | 1.47272800  |
| H | -0.15402700 | -2.78592300 | 2.62018400  |
| H | -1.92448800 | -2.50341300 | 2.62120700  |
| O | -1.65036600 | -4.09415500 | 0.08807600  |
| O | -1.34604200 | -2.46471600 | -1.44768300 |
| C | 1.68367900  | -3.36660100 | -0.04312200 |
| C | 1.95393300  | -1.91280800 | -1.92929400 |
| H | -1.88220000 | 1.78349200  | 4.77242200  |
| H | -3.36269300 | 2.65346900  | 4.31804300  |
| H | -1.99678500 | 3.53538300  | 5.01409400  |

---

|   |             |             |             |
|---|-------------|-------------|-------------|
| H | -0.07549400 | 4.25569500  | -3.93232200 |
| H | -0.17871300 | 3.57970100  | -5.56289200 |
| H | -1.64708200 | 3.79963000  | -4.60368400 |
| H | -2.13575200 | -4.80392800 | 1.95635400  |
| H | -0.40896900 | -4.89598300 | 1.52111500  |
| C | 2.01165400  | -4.46404200 | -0.83512600 |
| H | 1.50731800  | -3.48370500 | 1.02442500  |
| C | 2.29986300  | -3.00272000 | -2.72231300 |
| H | 1.96335800  | -0.91494700 | -2.36043100 |
| C | 2.31145000  | -4.28715900 | -2.18323500 |
| H | 2.04832700  | -5.45709600 | -0.39556000 |
| H | 2.55647600  | -2.85002300 | -3.76666200 |
| H | 2.56816000  | -5.13954000 | -2.80478100 |
| B | 2.03778600  | 0.34907400  | 0.21021100  |
| O | 1.66997500  | 1.57573500  | 0.75328400  |
| O | 3.31224800  | 0.40434700  | -0.32645800 |
| C | 2.68570000  | 2.53380800  | 0.39243100  |
| C | 2.83899700  | 3.54318400  | 1.51756400  |
| H | 3.68109800  | 4.21474000  | 1.32080700  |
| H | 1.93313200  | 4.15168500  | 1.59581900  |
| H | 2.99848700  | 3.04646200  | 2.47605100  |
| C | 2.21752500  | 3.22654600  | -0.88648600 |
| H | 2.91677000  | 4.00496800  | -1.20491900 |
| H | 2.10578700  | 2.50369300  | -1.70260500 |
| H | 1.24661700  | 3.69662500  | -0.70128800 |
| C | 3.92324900  | 1.61421700  | 0.15885100  |
| C | 4.64156600  | 1.26401300  | 1.46101500  |
| H | 5.35159300  | 0.45703800  | 1.26314600  |
| H | 5.19056300  | 2.11963900  | 1.86469900  |
| H | 3.92977800  | 0.91462800  | 2.21589400  |

---

|            |             |             |             |
|------------|-------------|-------------|-------------|
| C          | 4.91151100  | 2.12230500  | -0.87700700 |
| H          | 4.44298600  | 2.22597300  | -1.85762400 |
| H          | 5.32266600  | 3.09167200  | -0.57686600 |
| H          | 5.73996800  | 1.41508000  | -0.96985300 |
| O          | -0.24995700 | -0.27054200 | 3.86985000  |
| H          | 0.58187800  | -0.76670300 | 3.52849400  |
| H          | -0.67602600 | -0.90477900 | 4.45540300  |
| O          | 1.60773600  | -1.64403200 | 2.81750400  |
| H          | 2.50946100  | -1.61199900 | 3.15580200  |
| H          | -0.33775000 | -0.39351400 | 1.69359300  |
| H          | 1.58407600  | -1.25567900 | 1.49581900  |
| <b>M7R</b> |             |             |             |
| P          | -1.69150200 | 0.08685700  | -0.16774800 |
| C          | -3.24186900 | 0.67630300  | 0.60915200  |
| C          | -1.14967600 | 1.45311700  | -1.25063100 |
| C          | -4.21599100 | 1.34324800  | -0.36767600 |
| H          | -3.69883600 | -0.19504100 | 1.08256700  |
| H          | -2.95497400 | 1.36784900  | 1.41106200  |
| C          | -2.03168200 | -1.34748000 | -1.24470000 |
| C          | -0.25563000 | -0.13905400 | 0.99575800  |
| C          | -0.98485200 | 2.80627700  | -0.54927500 |
| H          | -0.20351200 | 1.14268500  | -1.70532300 |
| H          | -1.89507700 | 1.51813900  | -2.05334100 |
| C          | -5.53830500 | 1.69562000  | 0.31466500  |
| H          | -4.41648400 | 0.67194400  | -1.21335900 |
| H          | -3.77498000 | 2.25499400  | -0.78943000 |
| C          | -1.15264200 | -1.41794500 | -2.50222500 |
| H          | -3.09501500 | -1.29568800 | -1.50885900 |
| H          | -1.90101900 | -2.23222900 | -0.61779700 |
| N          | -0.63764900 | -0.71763400 | 2.29928300  |

---

|   |             |             |             |
|---|-------------|-------------|-------------|
| C | 0.95778000  | -0.66943000 | 0.29255200  |
| C | -0.87239100 | 3.94649500  | -1.56171000 |
| H | -1.83316300 | 3.00986800  | 0.11766100  |
| H | -0.08211200 | 2.77877100  | 0.07217500  |
| C | -6.51979500 | 2.36726100  | -0.63986200 |
| H | -5.33612400 | 2.35602600  | 1.16685500  |
| H | -5.98385000 | 0.78287900  | 0.72729300  |
| C | -1.14610100 | -2.82374700 | -3.09827300 |
| H | -1.51114300 | -0.69470900 | -3.24587700 |
| H | -0.12104300 | -1.14628700 | -2.25732800 |
| C | 0.40329800  | -0.84854800 | 3.30989800  |
| C | -1.62612500 | -1.62006000 | 2.52903500  |
| C | 1.08925900  | -2.06194200 | -0.12701500 |
| C | -0.66227100 | 5.29715700  | -0.88562600 |
| H | -1.78212800 | 3.97669600  | -2.17514200 |
| H | -0.04297300 | 3.73714600  | -2.24864300 |
| H | -6.10415500 | 3.29677300  | -1.04212500 |
| H | -6.75405300 | 1.71334400  | -1.48600200 |
| H | -7.45920100 | 2.61166400  | -0.13710300 |
| C | -0.26898300 | -2.90851300 | -4.34213300 |
| H | -2.17270800 | -3.13265100 | -3.33493000 |
| H | -0.76719500 | -3.51734200 | -2.33817800 |
| C | -0.40439600 | -1.48847400 | 4.43785000  |
| H | 1.21027100  | -1.49128200 | 2.94005700  |
| H | 0.81890500  | 0.12470000  | 3.58214700  |
| O | -1.48744600 | -2.15007300 | 3.76461600  |
| O | -2.52449800 | -1.95040200 | 1.77730500  |
| C | 0.32194700  | -3.13624200 | 0.38438800  |
| C | 2.03818100  | -2.42469100 | -1.12080400 |
| H | 0.24603000  | 5.29482500  | -0.27343500 |

---

|   |             |             |             |
|---|-------------|-------------|-------------|
| H | -1.50220300 | 5.53962600  | -0.22630000 |
| H | -0.56942700 | 6.10215600  | -1.61947700 |
| H | 0.75929200  | -2.62020000 | -4.10096300 |
| H | -0.24496600 | -3.92553800 | -4.74324500 |
| H | -0.63124400 | -2.24310800 | -5.13349400 |
| H | -0.82575100 | -0.73907700 | 5.11463000  |
| H | 0.15051500  | -2.23201800 | 5.00905100  |
| C | 0.49776700  | -4.45180800 | -0.04144000 |
| H | -0.44010500 | -2.95899700 | 1.13114700  |
| C | 2.21257900  | -3.73536700 | -1.54032500 |
| H | 2.64432900  | -1.64238100 | -1.56443200 |
| C | 1.44591800  | -4.77419000 | -1.00618400 |
| H | -0.12190600 | -5.23071900 | 0.39583800  |
| H | 2.95428300  | -3.94870700 | -2.30637900 |
| H | 1.58300700  | -5.79844000 | -1.33723300 |
| B | 2.07071100  | 0.32688500  | 0.18076500  |
| O | 1.97145100  | 1.64353800  | 0.69338500  |
| O | 3.34176800  | 0.14193100  | -0.37935700 |
| C | 3.11858400  | 2.37240700  | 0.24213600  |
| C | 3.49041400  | 3.41190200  | 1.28751200  |
| H | 4.41847600  | 3.92559800  | 1.01589800  |
| H | 2.69671800  | 4.16219700  | 1.35911000  |
| H | 3.61530200  | 2.95675800  | 2.27187100  |
| C | 2.75084000  | 3.05541500  | -1.07538600 |
| H | 3.57213800  | 3.66618800  | -1.46197700 |
| H | 2.48115100  | 2.31183300  | -1.83285800 |
| H | 1.88993100  | 3.70982600  | -0.90889400 |
| C | 4.16546600  | 1.23480300  | 0.04260200  |
| C | 4.83620800  | 0.82785600  | 1.35478200  |
| H | 5.37916200  | -0.10740300 | 1.19599300  |

---

|      |             |             |             |
|------|-------------|-------------|-------------|
| H    | 5.54302900  | 1.58618100  | 1.70490900  |
| H    | 4.08701800  | 0.65757200  | 2.13455100  |
| C    | 5.21501000  | 1.50710100  | -1.02344400 |
| H    | 4.75715500  | 1.64083100  | -2.00548900 |
| H    | 5.79684200  | 2.40218700  | -0.77928700 |
| H    | 5.90421200  | 0.66013000  | -1.08382600 |
| H    | -0.04537000 | 0.91382200  | 1.22601600  |
| TS5R |             |             |             |
| P    | -1.71969200 | 0.09653400  | -0.14269500 |
| C    | -3.57129400 | 0.04770600  | -0.12186200 |
| C    | -1.31786100 | 1.88803800  | -0.19728600 |
| C    | -4.26762400 | 0.93223000  | -1.15875400 |
| H    | -3.83304500 | -1.00610600 | -0.26170000 |
| H    | -3.89353400 | 0.31902200  | 0.89101200  |
| C    | -1.22843200 | -0.62768200 | -1.76589800 |
| C    | -0.13210100 | -0.57697600 | 1.27416600  |
| C    | -1.85417700 | 2.61669500  | 1.04032800  |
| H    | -0.22338100 | 1.94514300  | -0.21083700 |
| H    | -1.68818100 | 2.35975700  | -1.11416200 |
| C    | -5.78389500 | 0.73048600  | -1.16312400 |
| H    | -3.87352600 | 0.71816700  | -2.16135100 |
| H    | -4.04676500 | 1.98875400  | -0.95940600 |
| C    | -0.21718100 | 0.17952300  | -2.58151300 |
| H    | -2.14261000 | -0.79529800 | -2.34779400 |
| H    | -0.81985300 | -1.61526400 | -1.52803900 |
| N    | -0.84390100 | -1.54736900 | 2.07407000  |
| C    | 1.05924000  | -0.86278800 | 0.56672100  |
| C    | -1.19123100 | 3.97838100  | 1.23996800  |
| H    | -2.94231500 | 2.74090600  | 0.95796400  |
| H    | -1.68548500 | 2.01063000  | 1.94215300  |

---

|   |             |             |             |
|---|-------------|-------------|-------------|
| C | -6.48649000 | 1.62035800  | -2.18357100 |
| H | -6.17622100 | 0.93469800  | -0.15910000 |
| H | -6.00462900 | -0.32291400 | -1.37338900 |
| C | 0.17936200  | -0.53255800 | -3.87377700 |
| H | -0.62143000 | 1.17096100  | -2.82434100 |
| H | 0.68360300  | 0.34703000  | -1.97717100 |
| C | -0.31831800 | -1.90292400 | 3.38310300  |
| C | -1.63700400 | -2.54249000 | 1.57889200  |
| C | 1.36732200  | -2.16106100 | -0.07581400 |
| C | -1.77307100 | 4.74917600  | 2.41999300  |
| H | -1.29280300 | 4.56970400  | 0.32069600  |
| H | -0.11724800 | 3.81254400  | 1.39184800  |
| H | -6.30206800 | 2.67925000  | -1.97474500 |
| H | -6.12655300 | 1.41423500  | -3.19680400 |
| H | -7.56837400 | 1.46184300  | -2.17526800 |
| C | 1.28155800  | 0.21307400  | -4.61918600 |
| H | -0.70367000 | -0.64045900 | -4.51639900 |
| H | 0.51550300  | -1.54748900 | -3.63036800 |
| C | -1.31679500 | -2.98965900 | 3.79083900  |
| H | 0.71057700  | -2.27559200 | 3.30283600  |
| H | -0.33100400 | -1.04676700 | 4.06203400  |
| O | -1.86451900 | -3.45967000 | 2.55223700  |
| O | -2.10813500 | -2.64628700 | 0.46832100  |
| C | 1.05085300  | -3.41704800 | 0.47913100  |
| C | 2.05153500  | -2.18612400 | -1.31032900 |
| H | -1.66486400 | 4.18121100  | 3.34982500  |
| H | -2.84010700 | 4.94599600  | 2.27326700  |
| H | -1.27191500 | 5.71137300  | 2.55690200  |
| H | 2.18255400  | 0.29346000  | -4.00014900 |
| H | 1.55821900  | -0.29655700 | -5.54633100 |



---

|   |             |             |             |
|---|-------------|-------------|-------------|
| H | 0.96608800  | 1.22984200  | -4.87731700 |
| H | -2.13096500 | -2.58438300 | 4.39882500  |
| H | -0.85692300 | -3.83202500 | 4.30732700  |
| C | 1.35694500  | -4.60910900 | -0.17156100 |
| H | 0.58165900  | -3.48431300 | 1.45354100  |
| C | 2.36859200  | -3.37507400 | -1.95582200 |
| H | 2.34011600  | -1.24448300 | -1.76570000 |
| C | 2.01431900  | -4.60170800 | -1.39711700 |
| H | 1.08532100  | -5.55146800 | 0.29543700  |
| H | 2.89119400  | -3.33989000 | -2.90806700 |
| H | 2.25398800  | -5.53169800 | -1.90272500 |
| B | 2.01257600  | 0.31779400  | 0.42522700  |
| O | 1.78820300  | 1.57520700  | 1.00004000  |
| O | 3.22766400  | 0.29994300  | -0.24739200 |
| C | 2.80216600  | 2.46656400  | 0.49945000  |
| C | 3.15083200  | 3.48136800  | 1.57612200  |
| H | 3.99896800  | 4.09944900  | 1.26366300  |
| H | 2.29855700  | 4.14419900  | 1.75297700  |
| H | 3.40183700  | 2.99043300  | 2.51807100  |
| C | 2.23738900  | 3.17419500  | -0.73201700 |
| H | 2.95037800  | 3.89565200  | -1.14156800 |
| H | 1.98249400  | 2.45276900  | -1.51613200 |
| H | 1.32784100  | 3.71419100  | -0.45347500 |
| C | 3.95374900  | 1.47855300  | 0.13651600  |
| C | 4.81241400  | 1.11026700  | 1.34560000  |
| H | 5.44802800  | 0.26188700  | 1.07967400  |
| H | 5.45259900  | 1.94109500  | 1.65625400  |
| H | 4.18595800  | 0.81351000  | 2.19232600  |
| C | 4.83402500  | 1.91513300  | -1.02324800 |
| H | 4.25520700  | 2.02285800  | -1.94273300 |

---

|                                       |             |             |             |
|---------------------------------------|-------------|-------------|-------------|
| H                                     | 5.32629200  | 2.86769900  | -0.80148600 |
| H                                     | 5.60942300  | 1.16388900  | -1.19619800 |
| H                                     | -0.10379600 | 0.37432500  | 1.80658200  |
| <b>(Z)-<math>\beta</math>-product</b> |             |             |             |
| C                                     | 1.07337800  | -1.04318700 | -0.09824900 |
| N                                     | 2.44693600  | -1.16791500 | 0.01702100  |
| C                                     | 0.32016600  | 0.07831700  | -0.07751500 |
| C                                     | 3.41012200  | -0.18095500 | 0.48634100  |
| C                                     | 3.05128600  | -2.40595800 | -0.16092700 |
| C                                     | 0.85003700  | 1.46393900  | -0.13691500 |
| C                                     | 4.54554500  | -1.09922900 | 0.94884700  |
| H                                     | 3.72129800  | 0.48597600  | -0.32205000 |
| H                                     | 2.99288600  | 0.41965200  | 1.29629300  |
| O                                     | 4.33928300  | -2.32462300 | 0.23310000  |
| O                                     | 2.54101800  | -3.40346800 | -0.59569600 |
| C                                     | 0.43279900  | 2.43180800  | 0.78694400  |
| C                                     | 1.72881300  | 1.85389500  | -1.15647500 |
| H                                     | 4.48897400  | -1.31123500 | 2.02039800  |
| H                                     | 5.53544300  | -0.71866600 | 0.70034600  |
| C                                     | 0.91182600  | 3.73550500  | 0.71790000  |
| H                                     | -0.27442300 | 2.15063400  | 1.56183900  |
| C                                     | 2.20679000  | 3.15994700  | -1.22839500 |
| H                                     | 2.02360700  | 1.12284100  | -1.90545500 |
| C                                     | 1.80496800  | 4.10378400  | -0.28699800 |
| H                                     | 0.58396800  | 4.46868500  | 1.44848800  |
| H                                     | 2.88596000  | 3.44185200  | -2.02729200 |
| H                                     | 2.17509500  | 5.12261700  | -0.34244100 |
| B                                     | -1.21333800 | -0.15286900 | -0.02947500 |
| O                                     | -2.14071500 | 0.85913600  | -0.03890400 |
| O                                     | -1.78718800 | -1.40182000 | 0.03656300  |

---

|     |             |             |             |
|-----|-------------|-------------|-------------|
| C   | -3.42222200 | 0.25760600  | 0.25441200  |
| C   | -4.50468100 | 1.00277100  | -0.50737500 |
| H   | -5.47441200 | 0.51250200  | -0.37449500 |
| H   | -4.58469800 | 2.02428300  | -0.12607200 |
| H   | -4.27881600 | 1.05421300  | -1.57381300 |
| C   | -3.63862500 | 0.39187400  | 1.75993300  |
| H   | -4.62196800 | 0.01949200  | 2.06030600  |
| H   | -2.87203300 | -0.15609000 | 2.31654000  |
| H   | -3.57032300 | 1.44835000  | 2.03258100  |
| C   | -3.20237200 | -1.22269500 | -0.19642600 |
| C   | -3.43797000 | -1.42637500 | -1.69094200 |
| H   | -3.06250200 | -2.41248200 | -1.97567300 |
| H   | -4.50135600 | -1.37435900 | -1.94074400 |
| H   | -2.90284000 | -0.67438000 | -2.27870300 |
| C   | -3.97038700 | -2.25637200 | 0.60916100  |
| H   | -3.69101200 | -2.22973200 | 1.66382200  |
| H   | -5.04834200 | -2.08517300 | 0.52484200  |
| H   | -3.75350300 | -3.25631300 | 0.22407500  |
| H   | 0.59113600  | -2.01475800 | -0.17499100 |
| M5S |             |             |             |
| P   | -1.40298500 | 0.02636800  | -0.23551300 |
| C   | -2.80562600 | -1.14851900 | -0.35613700 |
| C   | -1.82658900 | 1.02193000  | 1.26612000  |
| C   | -4.23141300 | -0.60220900 | -0.21220700 |
| H   | -2.67819000 | -1.69326500 | -1.29613400 |
| H   | -2.59465500 | -1.87894200 | 0.43886200  |
| C   | -1.36961900 | 1.19683000  | -1.63216400 |
| C   | 0.08149500  | -0.89539400 | -0.31443000 |
| C   | -2.21597300 | 0.17615000  | 2.48599200  |
| H   | -0.93324300 | 1.61525500  | 1.47825700  |

---

|   |             |             |             |
|---|-------------|-------------|-------------|
| H | -2.63619000 | 1.71989200  | 1.01671600  |
| C | -5.21722700 | -1.70763000 | 0.16917800  |
| H | -4.55258000 | -0.15076200 | -1.15666800 |
| H | -4.28474800 | 0.19480300  | 0.53975600  |
| C | -2.70146500 | 1.82624400  | -2.04401200 |
| H | -0.92545600 | 0.66582800  | -2.48431700 |
| H | -0.65834100 | 1.97638600  | -1.32692200 |
| N | 0.28356900  | -1.70236400 | 0.86204500  |
| C | 1.37461100  | -0.26176400 | -0.89368000 |
| C | -2.18619500 | 0.99176000  | 3.77833600  |
| H | -3.21927000 | -0.24618700 | 2.34923900  |
| H | -1.54352200 | -0.68556200 | 2.58552100  |
| C | -6.65467300 | -1.20512600 | 0.24944600  |
| H | -4.91745700 | -2.13565000 | 1.13439700  |
| H | -5.14521000 | -2.52059900 | -0.56331300 |
| C | -2.48714200 | 2.96749800  | -3.03870200 |
| H | -3.33497900 | 1.06220800  | -2.50891200 |
| H | -3.25161000 | 2.20475100  | -1.17194600 |
| C | 1.01434600  | -1.24830800 | 2.04035600  |
| C | 0.27435900  | -3.07492500 | 0.81792100  |
| C | 2.45945500  | -1.33050500 | -1.04080400 |
| C | -2.61253500 | 0.17715100  | 4.99495800  |
| H | -2.84097900 | 1.86531600  | 3.66701100  |
| H | -1.17210900 | 1.38496800  | 3.92902600  |
| H | -6.75042600 | -0.40504100 | 0.99116800  |
| H | -6.98525400 | -0.80507900 | -0.71454800 |
| H | -7.34331100 | -2.00601500 | 0.53198500  |
| C | -3.79958800 | 3.57807600  | -3.51814300 |
| H | -1.91483900 | 2.58915500  | -3.89454800 |
| H | -1.86567400 | 3.74041600  | -2.56852700 |

---

|   |             |             |             |
|---|-------------|-------------|-------------|
| C | 0.92549700  | -2.49121000 | 2.92264700  |
| H | 2.05195400  | -0.99970600 | 1.78507000  |
| H | 0.54793300  | -0.36620400 | 2.48844800  |
| O | 0.72733200  | -3.56879400 | 2.00234100  |
| O | -0.09585900 | -3.80219700 | -0.07457400 |
| C | 3.61114300  | -1.34572200 | -0.24751100 |
| C | 2.30394900  | -2.35704800 | -1.98013100 |
| H | -1.95571100 | -0.68727800 | 5.13884300  |
| H | -3.63340300 | -0.19993500 | 4.87684400  |
| H | -2.58074400 | 0.77535100  | 5.90962100  |
| H | -4.37669800 | 3.97921000  | -2.67846700 |
| H | -3.62646800 | 4.39450100  | -4.22448900 |
| H | -4.42042300 | 2.82859500  | -4.01944300 |
| H | 0.06433500  | -2.44805200 | 3.59960500  |
| H | 1.82932300  | -2.68901200 | 3.49988800  |
| C | 4.56526100  | -2.35507800 | -0.37052400 |
| H | 3.78687600  | -0.54285500 | 0.46367100  |
| C | 3.25307000  | -3.36481900 | -2.10918100 |
| H | 1.42485900  | -2.35740500 | -2.61462700 |
| C | 4.38745900  | -3.37336500 | -1.29967200 |
| H | 5.44936400  | -2.33879000 | 0.26005700  |
| H | 3.10622300  | -4.14833800 | -2.84665800 |
| H | 5.12666700  | -4.16237400 | -1.39812300 |
| B | 1.89457600  | 1.06668500  | -0.21543400 |
| O | 3.07516600  | 1.69869600  | -0.52345500 |
| O | 1.15930100  | 1.78518700  | 0.70618900  |
| H | 1.13497700  | 0.04700600  | -1.92623400 |
| C | 3.25318400  | 2.77974700  | 0.41680000  |
| C | 3.96369300  | 3.92983400  | -0.27589600 |
| H | 4.03156500  | 4.79658600  | 0.38942100  |

---

|      |             |             |             |
|------|-------------|-------------|-------------|
| H    | 4.97890200  | 3.62468300  | -0.54257200 |
| H    | 3.44740400  | 4.22613900  | -1.19056500 |
| C    | 4.10670700  | 2.23839800  | 1.56169000  |
| H    | 4.34815000  | 3.01903500  | 2.28859400  |
| H    | 3.59320200  | 1.42409100  | 2.08407100  |
| H    | 5.04072600  | 1.84679300  | 1.15032000  |
| C    | 1.78396800  | 3.08064300  | 0.85176300  |
| C    | 1.06601000  | 4.03008400  | -0.10437600 |
| H    | -0.00219000 | 4.03409000  | 0.13403100  |
| H    | 1.44172900  | 5.05290100  | -0.01200700 |
| H    | 1.18694500  | 3.70667500  | -1.14329500 |
| C    | 1.61986400  | 3.54759700  | 2.28827700  |
| H    | 1.97172100  | 2.79436300  | 2.99607200  |
| H    | 2.17448300  | 4.47604000  | 2.45737700  |
| H    | 0.56355800  | 3.74442200  | 2.49461600  |
| O    | 0.12047500  | -0.54563100 | -4.06310100 |
| H    | -0.26035100 | -1.35553500 | -3.66503300 |
| H    | -0.21132200 | -0.52447700 | -4.96643300 |
| O    | -0.91693100 | -2.50673200 | -2.50560400 |
| H    | -0.56365500 | -2.00555700 | -1.70514600 |
| H    | -0.70703100 | -3.41538800 | -2.25385200 |
| TS3S |             |             |             |
| P    | -1.43341300 | 0.03687700  | -0.24403100 |
| C    | -2.79230400 | -1.15175800 | -0.50180300 |
| C    | -1.79073200 | 0.81849300  | 1.37929800  |
| C    | -4.22530300 | -0.62966900 | -0.34932700 |
| H    | -2.59892400 | -1.59441900 | -1.48578700 |
| H    | -2.58977700 | -1.94354700 | 0.23407300  |
| C    | -1.38164800 | 1.33510900  | -1.51454400 |
| C    | 0.08881900  | -0.93055700 | -0.43130600 |

---

|   |             |             |             |
|---|-------------|-------------|-------------|
| C | -2.22091900 | -0.16196200 | 2.47923200  |
| H | -0.88568000 | 1.35882600  | 1.66571200  |
| H | -2.57779900 | 1.56528300  | 1.21262900  |
| C | -5.20852600 | -1.77596100 | -0.10808300 |
| H | -4.52172500 | -0.09239900 | -1.25590700 |
| H | -4.31095600 | 0.09062100  | 0.47514100  |
| C | -2.69767900 | 2.04442300  | -1.83965900 |
| H | -0.95590200 | 0.87402900  | -2.41828000 |
| H | -0.64164800 | 2.05614900  | -1.14192100 |
| N | 0.28281600  | -1.77403800 | 0.72498000  |
| C | 1.37818600  | -0.20907800 | -0.92146300 |
| C | -2.19843200 | 0.49952700  | 3.85691500  |
| H | -3.23023500 | -0.53915400 | 2.27518000  |
| H | -1.56800600 | -1.04347700 | 2.48697100  |
| C | -6.65331400 | -1.29592600 | -0.02463900 |
| H | -4.93312000 | -2.29406400 | 0.81945200  |
| H | -5.10362200 | -2.51149300 | -0.91436300 |
| C | -2.45262100 | 3.27293500  | -2.71646100 |
| H | -3.36089300 | 1.35297600  | -2.37070000 |
| H | -3.22342500 | 2.35040100  | -0.92478400 |
| C | 1.01886200  | -1.36796400 | 1.91248700  |
| C | 0.27639200  | -3.14707900 | 0.60998900  |
| C | 2.47547600  | -1.25203100 | -1.14621700 |
| C | -2.67454400 | -0.43862300 | 4.96079700  |
| H | -2.82721200 | 1.39853000  | 3.83547400  |
| H | -1.17792300 | 0.84299000  | 4.07259700  |
| H | -6.78154700 | -0.57332600 | 0.78832800  |
| H | -6.95878700 | -0.80657800 | -0.95506400 |
| H | -7.34034800 | -2.12693900 | 0.15625100  |
| C | -3.74758800 | 3.97311400  | -3.11356000 |

---

|   |             |             |             |
|---|-------------|-------------|-------------|
| H | -1.90230400 | 2.96350500  | -3.61319200 |
| H | -1.79970500 | 3.97278700  | -2.17934900 |
| C | 0.94885700  | -2.65632400 | 2.73314200  |
| H | 2.05191100  | -1.09659600 | 1.66320200  |
| H | 0.54904100  | -0.51726400 | 2.41511600  |
| O | 0.74265000  | -3.68992900 | 1.76744500  |
| O | -0.09776700 | -3.81733200 | -0.31810100 |
| C | 3.63784400  | -1.30389000 | -0.37040100 |
| C | 2.31431200  | -2.21161600 | -2.15354300 |
| H | -2.04797500 | -1.33517000 | 5.01273900  |
| H | -3.70377200 | -0.76493000 | 4.78125700  |
| H | -2.64348900 | 0.04718300  | 5.93963600  |
| H | -4.30246100 | 4.30532600  | -2.22990100 |
| H | -3.55183700 | 4.85133300  | -3.73460900 |
| H | -4.39858100 | 3.30089200  | -3.68150500 |
| H | 0.09916900  | -2.64927400 | 3.42548500  |
| H | 1.86365200  | -2.87256200 | 3.28563300  |
| C | 4.60529400  | -2.28509900 | -0.58227500 |
| H | 3.81280100  | -0.55294100 | 0.39543000  |
| C | 3.27777700  | -3.19126800 | -2.36724200 |
| H | 1.41538300  | -2.17886600 | -2.76055000 |
| C | 4.42739900  | -3.23564500 | -1.58095200 |
| H | 5.49996200  | -2.29947200 | 0.03320600  |
| H | 3.12964800  | -3.92444400 | -3.15438800 |
| H | 5.17814200  | -4.00177500 | -1.74864400 |
| B | 1.86577200  | 1.06663400  | -0.13549100 |
| O | 3.04126200  | 1.72811900  | -0.38168000 |
| O | 1.11574000  | 1.69954800  | 0.83502900  |
| H | 1.13124400  | 0.17354600  | -1.92766400 |
| C | 3.20533600  | 2.72893600  | 0.64689700  |



---

|     |             |             |             |
|-----|-------------|-------------|-------------|
| C   | 3.91259800  | 3.93567800  | 0.05547600  |
| H   | 3.97296700  | 4.74502400  | 0.79005000  |
| H   | 4.93043300  | 3.65784600  | -0.22998600 |
| H   | 3.39915600  | 4.30304600  | -0.83458500 |
| C   | 4.05411700  | 2.09805600  | 1.74838800  |
| H   | 4.28264900  | 2.81503400  | 2.54185300  |
| H   | 3.54321900  | 1.23771300  | 2.19441600  |
| H   | 4.99481000  | 1.75075300  | 1.31333500  |
| C   | 1.73136900  | 2.98459500  | 1.09515600  |
| C   | 1.01294000  | 4.00697600  | 0.21884300  |
| H   | -0.05619700 | 3.98640300  | 0.45260000  |
| H   | 1.38334200  | 5.01970700  | 0.39995100  |
| H   | 1.14069400  | 3.77385600  | -0.84321800 |
| C   | 1.55509900  | 3.32430300  | 2.56537300  |
| H   | 1.90487000  | 2.51344100  | 3.20752600  |
| H   | 2.10622100  | 4.23549200  | 2.81817600  |
| H   | 0.49705900  | 3.50106800  | 2.78067900  |
| O   | 0.24050700  | -0.05224100 | -4.02405900 |
| H   | -0.19316000 | -0.86872400 | -3.59906100 |
| H   | -0.23024800 | 0.08529200  | -4.85204500 |
| O   | -0.85466900 | -1.89918700 | -2.67512100 |
| H   | -0.33542200 | -1.57876600 | -1.48254100 |
| H   | -0.70525600 | -2.84893400 | -2.74220600 |
| M6S |             |             |             |
| P   | -1.39595200 | -0.13751700 | -0.44650900 |
| C   | -2.71207100 | -1.23929900 | -1.04788500 |
| C   | -1.85898500 | 0.27787300  | 1.28565300  |
| C   | -4.09728000 | -0.58975600 | -1.03927700 |
| H   | -2.38444600 | -1.49702100 | -2.05878800 |
| H   | -2.68219600 | -2.15039300 | -0.44069200 |

---

|   |             |             |             |
|---|-------------|-------------|-------------|
| C | -1.40460300 | 1.41643900  | -1.41000100 |
| C | 0.20119400  | -1.12191100 | -0.46747700 |
| C | -2.35183800 | -0.86268300 | 2.18316700  |
| H | -1.00886300 | 0.80548400  | 1.72887500  |
| H | -2.66424200 | 1.01636600  | 1.19792500  |
| C | -5.17308600 | -1.55843300 | -1.53146300 |
| H | -4.09421100 | 0.30134200  | -1.68092600 |
| H | -4.35994000 | -0.24885000 | -0.02783200 |
| C | -2.13694500 | 2.59518700  | -0.77302300 |
| H | -1.82178400 | 1.12949000  | -2.37837200 |
| H | -0.36545300 | 1.67787100  | -1.62960200 |
| N | 0.39182200  | -1.85916700 | 0.76188800  |
| C | 1.46702800  | -0.35698700 | -0.89981200 |
| C | -2.80769100 | -0.33527100 | 3.54451000  |
| H | -3.18616000 | -1.38974800 | 1.70433100  |
| H | -1.57049000 | -1.61111000 | 2.34676200  |
| C | -6.55996200 | -0.92480800 | -1.55009800 |
| H | -5.17605900 | -2.44606000 | -0.88724400 |
| H | -4.90679800 | -1.90575000 | -2.53659700 |
| C | -2.13401200 | 3.79940300  | -1.71564600 |
| H | -3.17621200 | 2.33589000  | -0.52976000 |
| H | -1.65168400 | 2.86677600  | 0.17420600  |
| C | 1.09400800  | -1.40810700 | 1.94713500  |
| C | -0.17678100 | -3.09076800 | 0.94708000  |
| C | 2.54178600  | -1.36777700 | -1.26762100 |
| C | -3.26692700 | -1.45692900 | 4.46994700  |
| H | -3.62013500 | 0.38780000  | 3.39999700  |
| H | -1.98175300 | 0.21757000  | 4.01101700  |
| H | -6.85491600 | -0.59370200 | -0.54886400 |
| H | -6.58377600 | -0.05155000 | -2.20999900 |

---

|   |             |             |             |
|---|-------------|-------------|-------------|
| H | -7.31583300 | -1.63105300 | -1.90380200 |
| C | -2.71642200 | 5.04757300  | -1.06152900 |
| H | -2.70390100 | 3.54608000  | -2.61733900 |
| H | -1.10790300 | 3.99150100  | -2.05203100 |
| C | 1.20868800  | -2.73144200 | 2.71397200  |
| H | 2.08041300  | -1.00507100 | 1.70509500  |
| H | 0.52652800  | -0.64567500 | 2.49729500  |
| O | 0.17888500  | -3.56462900 | 2.16728600  |
| O | -0.91050900 | -3.68323400 | 0.19366600  |
| C | 3.67963100  | -1.60528900 | -0.49384900 |
| C | 2.34738100  | -2.12111800 | -2.43398500 |
| H | -2.46017400 | -2.17705600 | 4.64222300  |
| H | -4.10914700 | -2.00385200 | 4.03475200  |
| H | -3.58491600 | -1.06912000 | 5.44139000  |
| H | -2.13154400 | 5.33953400  | -0.18200600 |
| H | -2.72398200 | 5.89477200  | -1.75248700 |
| H | -3.74634900 | 4.87627200  | -0.73104600 |
| H | 1.03744700  | -2.62901300 | 3.78539400  |
| H | 2.17508700  | -3.21133900 | 2.53386800  |
| C | 4.60211000  | -2.58215800 | -0.86937300 |
| H | 3.87228100  | -1.00086200 | 0.38821500  |
| C | 3.26856900  | -3.09365500 | -2.80705600 |
| H | 1.45336600  | -1.91319400 | -3.02554100 |
| C | 4.39770600  | -3.33112800 | -2.02328900 |
| H | 5.48472900  | -2.75192300 | -0.25973800 |
| H | 3.10726600  | -3.66905200 | -3.71390000 |
| H | 5.11595400  | -4.09134200 | -2.31487900 |
| B | 1.87642600  | 0.85767500  | 0.00269900  |
| O | 3.14004800  | 1.36296300  | 0.13993000  |
| O | 0.93445300  | 1.60521600  | 0.68186500  |

---

|      |             |             |             |
|------|-------------|-------------|-------------|
| H    | 1.18402100  | 0.14335800  | -1.83894000 |
| C    | 3.08058500  | 2.43056600  | 1.11526300  |
| C    | 4.06693200  | 3.51381900  | 0.71526100  |
| H    | 3.97753600  | 4.37983900  | 1.37871900  |
| H    | 5.08622300  | 3.12716100  | 0.79527200  |
| H    | 3.90557000  | 3.83788500  | -0.31400400 |
| C    | 3.46778200  | 1.82330900  | 2.46068300  |
| H    | 3.52023200  | 2.58403700  | 3.24446100  |
| H    | 2.74797900  | 1.05764800  | 2.76802100  |
| H    | 4.45094800  | 1.35451900  | 2.36765700  |
| C    | 1.57811700  | 2.85273700  | 1.05013100  |
| C    | 1.29652100  | 3.84779700  | -0.07198400 |
| H    | 0.21626400  | 3.98904100  | -0.16062100 |
| H    | 1.75022600  | 4.82069600  | 0.13580100  |
| H    | 1.67140500  | 3.47908200  | -1.03252400 |
| C    | 0.98881900  | 3.33890100  | 2.36224100  |
| H    | 1.04179200  | 2.56955700  | 3.13586000  |
| H    | 1.51894300  | 4.22893800  | 2.71541100  |
| H    | -0.06148300 | 3.60935200  | 2.21656600  |
| O    | 0.76597700  | 1.38541000  | -3.55145700 |
| H    | 0.20522400  | 0.49667400  | -3.44645200 |
| H    | 1.59036100  | 1.09832800  | -3.95918500 |
| O    | -0.50449800 | -0.71311800 | -3.08641100 |
| H    | -0.02465300 | -1.84193000 | -1.25908800 |
| H    | -1.02274900 | -0.97699800 | -3.85501800 |
| TS4S |             |             |             |
| P    | -1.36903100 | -0.07913400 | -0.37620500 |
| C    | -2.67119600 | -1.20189100 | -0.97147300 |
| C    | -1.80617800 | 0.36491200  | 1.35047600  |
| C    | -4.05996100 | -0.55988700 | -1.03007500 |

---

|   |             |             |             |
|---|-------------|-------------|-------------|
| H | -2.33564300 | -1.50586700 | -1.96886100 |
| H | -2.65864000 | -2.09255000 | -0.33215200 |
| C | -1.37395000 | 1.40741300  | -1.43432800 |
| C | 0.19996400  | -1.09002700 | -0.44484100 |
| C | -2.41739900 | -0.75331500 | 2.20341100  |
| H | -0.90427700 | 0.78352200  | 1.80543100  |
| H | -2.52349000 | 1.19005500  | 1.27923400  |
| C | -5.12995300 | -1.57272400 | -1.43765500 |
| H | -4.05012800 | 0.26611100  | -1.75301100 |
| H | -4.33119500 | -0.12306900 | -0.05874400 |
| C | -2.17544100 | 2.58733700  | -0.88435700 |
| H | -1.75968300 | 1.06185300  | -2.39944300 |
| H | -0.33332500 | 1.69051900  | -1.62203500 |
| N | 0.21816000  | -1.94313300 | 0.73841800  |
| C | 1.51418300  | -0.36311100 | -0.70573500 |
| C | -2.62978000 | -0.29383600 | 3.64608800  |
| H | -3.37981700 | -1.06395300 | 1.77838000  |
| H | -1.77989600 | -1.64339800 | 2.19889500  |
| C | -6.51518400 | -0.94364700 | -1.54030700 |
| H | -5.14416000 | -2.39097100 | -0.70729800 |
| H | -4.84976000 | -2.01977000 | -2.39861600 |
| C | -2.23531500 | 3.72592400  | -1.90284500 |
| H | -3.19949600 | 2.28899000  | -0.62203000 |
| H | -1.70562100 | 2.94536400  | 0.04154600  |
| C | 0.98171200  | -1.66094100 | 1.93858700  |
| C | -0.14008500 | -3.26316500 | 0.66174800  |
| C | 2.58932400  | -1.35594600 | -1.07192200 |
| C | -3.29455700 | -1.36711100 | 4.50176600  |
| H | -3.24122700 | 0.61704700  | 3.65110600  |
| H | -1.66056600 | -0.01645800 | 4.08083700  |

---

|   |             |             |             |
|---|-------------|-------------|-------------|
| H | -6.82338800 | -0.51122400 | -0.58266100 |
| H | -6.52840200 | -0.14305100 | -2.28682100 |
| H | -7.26722200 | -1.68238400 | -1.82987900 |
| C | -2.88424400 | 4.98019800  | -1.32775900 |
| H | -2.78998600 | 3.38483600  | -2.78506100 |
| H | -1.21999400 | 3.95216900  | -2.25041700 |
| C | 0.69822900  | -2.92919300 | 2.75958100  |
| H | 2.04511000  | -1.54055200 | 1.70631500  |
| H | 0.62601700  | -0.75843100 | 2.44641300  |
| O | 0.18060900  | -3.88207900 | 1.82419300  |
| O | -0.68193300 | -3.82435200 | -0.25993500 |
| C | 3.77896500  | -1.50994600 | -0.34887400 |
| C | 2.40615000  | -2.16342700 | -2.20626500 |
| H | -2.69682300 | -2.28442900 | 4.52006700  |
| H | -4.28228500 | -1.62581900 | 4.10761400  |
| H | -3.42351400 | -1.03114200 | 5.53400200  |
| H | -2.31397500 | 5.35896000  | -0.47241900 |
| H | -2.93864700 | 5.77918000  | -2.07191700 |
| H | -3.90296400 | 4.77500400  | -0.98226100 |
| H | -0.05768300 | -2.75601600 | 3.53196800  |
| H | 1.59362700  | -3.34770100 | 3.21975400  |
| C | 4.74297000  | -2.43966400 | -0.73637000 |
| H | 3.96164400  | -0.87386700 | 0.51255900  |
| C | 3.36103600  | -3.09879500 | -2.58819800 |
| H | 1.50119300  | -2.02986400 | -2.79582200 |
| C | 4.53629400  | -3.24413900 | -1.85239200 |
| H | 5.65854900  | -2.53530100 | -0.15958400 |
| H | 3.19186100  | -3.71222800 | -3.46844900 |
| H | 5.28405200  | -3.97255900 | -2.15040500 |
| B | 1.87052100  | 0.86100600  | 0.13935900  |

---

|     |             |             |             |
|-----|-------------|-------------|-------------|
| O   | 3.12858800  | 1.41329000  | 0.25787100  |
| O   | 0.90254300  | 1.67372300  | 0.73031000  |
| H   | 1.35137700  | 0.29779800  | -1.77524500 |
| C   | 3.02246900  | 2.57386900  | 1.10359100  |
| C   | 4.01338800  | 3.62165400  | 0.62502100  |
| H   | 3.88513500  | 4.55871800  | 1.17657700  |
| H   | 5.03297100  | 3.26435400  | 0.79286900  |
| H   | 3.89395500  | 3.81857200  | -0.44163200 |
| C   | 3.35922000  | 2.12885200  | 2.52517600  |
| H   | 3.37260500  | 2.97209800  | 3.22174500  |
| H   | 2.63585200  | 1.38961000  | 2.88444600  |
| H   | 4.34935400  | 1.66545800  | 2.52392300  |
| C   | 1.52180500  | 2.96545500  | 0.93442200  |
| C   | 1.27435100  | 3.78776200  | -0.32893200 |
| H   | 0.19753600  | 3.93192400  | -0.45250200 |
| H   | 1.73995900  | 4.77501900  | -0.26299200 |
| H   | 1.64989400  | 3.26746800  | -1.21753100 |
| C   | 0.89005100  | 3.63085200  | 2.14443600  |
| H   | 0.92926200  | 2.98487900  | 3.02422100  |
| H   | 1.39911700  | 4.57166800  | 2.37701700  |
| H   | -0.15936300 | 3.85992700  | 1.93368000  |
| O   | 1.15191200  | 1.00099500  | -2.97457900 |
| H   | 0.14521600  | -0.01473600 | -3.30742300 |
| H   | 1.97144100  | 0.86042800  | -3.46377100 |
| O   | -0.59883100 | -0.74945700 | -3.32860300 |
| H   | -0.02141900 | -1.74955700 | -1.29062900 |
| H   | -0.48170900 | -1.24047300 | -4.14753400 |
| M7S |             |             |             |
| P   | -1.26270000 | -0.02450000 | -0.55329500 |
| C   | -2.62087400 | -1.03135300 | -1.23832800 |

---

|   |             |             |             |
|---|-------------|-------------|-------------|
| C | -1.80258200 | 0.53598200  | 1.10476100  |
| C | -3.91645500 | -0.25929400 | -1.50340800 |
| H | -2.24140300 | -1.47460100 | -2.16649900 |
| H | -2.78089100 | -1.86868900 | -0.54949600 |
| C | -0.99190400 | 1.36438000  | -1.70464500 |
| C | 0.21255900  | -1.16227000 | -0.50974700 |
| C | -2.65375400 | -0.46012800 | 1.90061600  |
| H | -0.88781800 | 0.80514000  | 1.63876500  |
| H | -2.36493700 | 1.46513400  | 0.95679600  |
| C | -5.05900600 | -1.19462300 | -1.89924900 |
| H | -3.75180300 | 0.47121300  | -2.30584400 |
| H | -4.21315100 | 0.31520800  | -0.61500600 |
| C | -1.78669700 | 2.63471800  | -1.39643700 |
| H | -1.23933000 | 0.97812700  | -2.70138100 |
| H | 0.08405300  | 1.55965000  | -1.68984100 |
| N | 0.02596000  | -1.98336100 | 0.71249100  |
| C | 1.56863400  | -0.56744500 | -0.69111400 |
| C | -2.92464700 | 0.06060300  | 3.31246500  |
| H | -3.60944400 | -0.63851600 | 1.39245000  |
| H | -2.14799500 | -1.42943700 | 1.96449100  |
| C | -6.34561000 | -0.43742400 | -2.20954300 |
| H | -5.23225700 | -1.90969300 | -1.08594500 |
| H | -4.75300100 | -1.78532400 | -2.77085900 |
| C | -1.53410900 | 3.71851600  | -2.44356200 |
| H | -2.86223400 | 2.42268800  | -1.34478100 |
| H | -1.49370800 | 3.00872700  | -0.40818000 |
| C | 0.87715800  | -1.84407800 | 1.88286800  |
| C | -0.49421700 | -3.24636300 | 0.63927800  |
| C | 2.54781900  | -1.46028500 | -1.30460400 |
| C | -3.80486200 | -0.88861900 | 4.11864200  |



---

|   |             |             |             |
|---|-------------|-------------|-------------|
| H | -3.40070900 | 1.04710800  | 3.25057000  |
| H | -1.96740500 | 0.21115700  | 3.82780500  |
| H | -6.68059700 | 0.14075500  | -1.34218100 |
| H | -6.20016500 | 0.26123800  | -3.03972600 |
| H | -7.15222800 | -1.12120300 | -2.48621500 |
| C | -2.24472700 | 5.02400600  | -2.10308000 |
| H | -1.86481400 | 3.35570400  | -3.42428900 |
| H | -0.45400000 | 3.89179800  | -2.52502300 |
| C | 0.34039000  | -2.99548000 | 2.73898500  |
| H | 1.93082900  | -1.96591600 | 1.61160900  |
| H | 0.74707300  | -0.86988400 | 2.36350600  |
| O | -0.26686200 | -3.89960300 | 1.80419900  |
| O | -1.08518100 | -3.74294500 | -0.29450200 |
| C | 3.82002100  | -0.98955500 | -1.72238000 |
| C | 2.30823500  | -2.83951400 | -1.52471700 |
| H | -3.34146300 | -1.87653900 | 4.20777300  |
| H | -4.77930800 | -1.02295800 | 3.63857000  |
| H | -3.97912400 | -0.50860100 | 5.12867700  |
| H | -1.89692100 | 5.42040600  | -1.14324500 |
| H | -2.06258600 | 5.78678200  | -2.86446600 |
| H | -3.32710300 | 4.87633200  | -2.02948200 |
| H | -0.42775000 | -2.65867900 | 3.44320000  |
| H | 1.11917000  | -3.53185600 | 3.28088900  |
| C | 4.76082800  | -1.82497900 | -2.30300500 |
| H | 4.05522900  | 0.05968700  | -1.58433900 |
| C | 3.25343200  | -3.66988200 | -2.12268300 |
| H | 1.36783100  | -3.29159200 | -1.22058300 |
| C | 4.49294900  | -3.17951300 | -2.51681800 |
| H | 5.71890500  | -1.40950900 | -2.60622600 |
| H | 3.01254000  | -4.72003500 | -2.26801500 |

---

|      |             |             |             |
|------|-------------|-------------|-------------|
| H    | 5.23077300  | -3.82913300 | -2.97654100 |
| B    | 1.93960500  | 0.70241500  | -0.01051900 |
| O    | 3.21047100  | 1.28403900  | 0.11046500  |
| O    | 0.99040000  | 1.52411400  | 0.65849200  |
| C    | 3.13715700  | 2.28010300  | 1.13454100  |
| C    | 4.16854000  | 3.36118200  | 0.85159400  |
| H    | 4.06704200  | 4.19361100  | 1.55591700  |
| H    | 5.17335800  | 2.94408700  | 0.96144200  |
| H    | 4.07208900  | 3.74461300  | -0.16580700 |
| C    | 3.44163600  | 1.59923600  | 2.46931000  |
| H    | 3.48080800  | 2.31608600  | 3.29504400  |
| H    | 2.68669500  | 0.84004900  | 2.69801200  |
| H    | 4.41088400  | 1.09988000  | 2.39466600  |
| C    | 1.65251000  | 2.74304400  | 1.03112400  |
| C    | 1.45562700  | 3.76100100  | -0.09191700 |
| H    | 0.38690200  | 3.93275900  | -0.24563000 |
| H    | 1.91826800  | 4.72200100  | 0.15086400  |
| H    | 1.88924400  | 3.39191500  | -1.02707200 |
| C    | 1.04345000  | 3.25735700  | 2.32580700  |
| H    | 1.05086100  | 2.48718700  | 3.10058500  |
| H    | 1.58920800  | 4.13158300  | 2.69536500  |
| H    | 0.00474700  | 3.55802200  | 2.15304900  |
| H    | -0.02324000 | -1.84830400 | -1.33654800 |
| TS5S |             |             |             |
| P    | -1.33209300 | 0.50880900  | -0.16793100 |
| C    | -2.88839500 | 1.27077400  | -0.77991800 |
| C    | -1.81098100 | -0.86634800 | 0.95914800  |
| C    | -3.78117600 | 1.92311500  | 0.27760200  |
| H    | -2.59152200 | 2.00505900  | -1.53941000 |
| H    | -3.41659900 | 0.47765100  | -1.31893400 |

---

|   |             |             |             |
|---|-------------|-------------|-------------|
| C | -0.47853700 | 1.78714800  | 0.83007100  |
| C | 0.18040100  | -0.09949500 | -1.65871200 |
| C | -2.96959300 | -1.73227900 | 0.45540900  |
| H | -0.89939500 | -1.46649700 | 1.06646900  |
| H | -2.05938900 | -0.45737900 | 1.94586600  |
| C | -5.12210400 | 2.37314400  | -0.30348400 |
| H | -3.26706100 | 2.78914900  | 0.71357100  |
| H | -3.96354500 | 1.22064800  | 1.10307500  |
| C | -0.83907400 | 1.93103800  | 2.30949800  |
| H | -0.63045200 | 2.73534000  | 0.29703800  |
| H | 0.59166900  | 1.55730700  | 0.72664500  |
| N | -0.16382000 | -1.48332700 | -1.85222200 |
| C | 1.49125800  | 0.27003600  | -1.23009300 |
| C | -3.17797400 | -2.96055800 | 1.34097900  |
| H | -3.89435100 | -1.14076100 | 0.43248000  |
| H | -2.79547400 | -2.05851100 | -0.57583200 |
| C | -6.00801800 | 3.05228800  | 0.73575600  |
| H | -5.63966900 | 1.50179800  | -0.72313400 |
| H | -4.93860200 | 3.05716300  | -1.14109600 |
| C | -0.03325100 | 3.04675000  | 2.97533300  |
| H | -1.91066200 | 2.12881200  | 2.43515200  |
| H | -0.63222300 | 0.98996600  | 2.83100500  |
| C | 0.79408700  | -2.57644900 | -1.97791500 |
| C | -1.30006800 | -1.77876800 | -2.55677700 |
| C | 2.05488600  | 1.49811400  | -1.82127200 |
| C | -4.32503300 | -3.83889300 | 0.85237500  |
| H | -3.36764900 | -2.63684200 | 2.37215100  |
| H | -2.24828000 | -3.54358400 | 1.36599000  |
| H | -6.22203900 | 2.37700700  | 1.57071700  |
| H | -5.52069700 | 3.94303500  | 1.14536000  |

---

|   |             |             |             |
|---|-------------|-------------|-------------|
| H | -6.96360500 | 3.36307200  | 0.30482500  |
| C | -0.29376200 | 3.13338700  | 4.47536600  |
| H | -0.27429700 | 4.00340100  | 2.49595700  |
| H | 1.03538800  | 2.87366000  | 2.79294900  |
| C | -0.17047100 | -3.72107600 | -2.28460200 |
| H | 1.49697600  | -2.38157300 | -2.79575400 |
| H | 1.34022800  | -2.73950000 | -1.05159400 |
| O | -1.30220300 | -3.08678200 | -2.90035200 |
| O | -2.19700900 | -1.01564300 | -2.84142700 |
| C | 2.89434100  | 2.35853200  | -1.08144300 |
| C | 1.78694200  | 1.88370700  | -3.15167400 |
| H | -4.13893500 | -4.19213100 | -0.16705800 |
| H | -5.26818700 | -3.28322400 | 0.84301500  |
| H | -4.45961200 | -4.71514700 | 1.49245300  |
| H | -0.01497800 | 2.19880800  | 4.97392600  |
| H | 0.28060000  | 3.94173700  | 4.93585000  |
| H | -1.35341200 | 3.31677000  | 4.68133600  |
| H | -0.51017600 | -4.21399000 | -1.36741400 |
| H | 0.23008100  | -4.46163700 | -2.97622500 |
| C | 3.41998000  | 3.52104000  | -1.63149600 |
| H | 3.13149500  | 2.10079300  | -0.05404800 |
| C | 2.29830800  | 3.05680200  | -3.69633800 |
| H | 1.18874200  | 1.23387800  | -3.78513800 |
| C | 3.12164400  | 3.88933100  | -2.94256300 |
| H | 4.06104900  | 4.15393700  | -1.02354700 |
| H | 2.06464200  | 3.31120000  | -4.72668000 |
| H | 3.52768800  | 4.80106300  | -3.36889700 |
| B | 2.11354600  | -0.40336700 | -0.03051600 |
| O | 3.37133200  | -0.15709600 | 0.51272800  |
| O | 1.44350500  | -1.38214000 | 0.72496300  |

---

|   |             |             |             |
|---|-------------|-------------|-------------|
| C | 3.64378200  | -1.18759100 | 1.47461100  |
| C | 4.51082500  | -0.61449100 | 2.58408000  |
| H | 4.65814800  | -1.34994500 | 3.38178900  |
| H | 5.49180400  | -0.34818000 | 2.18139300  |
| H | 4.06495100  | 0.28540100  | 3.01213500  |
| C | 4.38832100  | -2.30431900 | 0.74429900  |
| H | 4.69326700  | -3.10411900 | 1.42540100  |
| H | 3.76702000  | -2.73471800 | -0.04793900 |
| H | 5.28271100  | -1.88317300 | 0.27846300  |
| C | 2.20994800  | -1.61412000 | 1.91879600  |
| C | 1.63821700  | -0.70751200 | 3.00739300  |
| H | 0.57690600  | -0.94042100 | 3.13754400  |
| H | 2.14184800  | -0.85478500 | 3.96713900  |
| H | 1.72972200  | 0.34637400  | 2.72152800  |
| C | 2.06976500  | -3.07322300 | 2.32221700  |
| H | 2.33909900  | -3.74180700 | 1.50189700  |
| H | 2.70650200  | -3.30181900 | 3.18302000  |
| H | 1.03275600  | -3.27982300 | 2.60428000  |
| H | -0.24267300 | 0.49731000  | -2.46780400 |

**(E)- $\beta$ -product**

|   |             |             |             |
|---|-------------|-------------|-------------|
| C | -1.82507200 | -0.42351600 | -0.21269800 |
| N | -2.40955700 | 0.83060200  | -0.15325900 |
| C | -0.52754900 | -0.77382800 | -0.07076800 |
| C | -1.84392300 | 2.03154300  | 0.44305400  |
| C | -3.79715300 | 0.92200800  | -0.21774100 |
| C | -0.24621600 | -2.23871400 | -0.02364100 |
| C | -3.02515200 | 2.99860300  | 0.31424700  |
| H | -1.56419900 | 1.83006900  | 1.48541900  |
| H | -0.97119900 | 2.38101200  | -0.10342300 |
| O | -4.17613600 | 2.16502500  | 0.13709200  |

---

|   |             |             |             |
|---|-------------|-------------|-------------|
| O | -4.56543500 | 0.04902600  | -0.52256300 |
| C | 0.88711600  | -2.77073300 | -0.65570400 |
| C | -1.10372200 | -3.12852500 | 0.63856700  |
| H | -2.92689900 | 3.63930300  | -0.56592200 |
| H | -3.17870700 | 3.61432700  | 1.20018300  |
| C | 1.13840200  | -4.13768200 | -0.65006900 |
| H | 1.57689200  | -2.10289300 | -1.16398700 |
| C | -0.85755900 | -4.49831500 | 0.64007500  |
| H | -1.96303800 | -2.73822600 | 1.17614300  |
| C | 0.26385500  | -5.01031300 | -0.00575700 |
| H | 2.01913900  | -4.52380900 | -1.15408700 |
| H | -1.53868300 | -5.16477600 | 1.16040200  |
| H | 0.46044100  | -6.07769000 | 0.00033900  |
| B | 0.71427100  | 0.17000400  | -0.01320200 |
| O | 1.86406000  | -0.17960800 | 0.64937700  |
| O | 0.83364200  | 1.37909200  | -0.66149900 |
| C | 2.73624700  | 0.97153100  | 0.64373400  |
| C | 4.17712400  | 0.49862100  | 0.55317400  |
| H | 4.85693300  | 1.35145700  | 0.45968400  |
| H | 4.43993100  | -0.04901900 | 1.46190400  |
| H | 4.32603600  | -0.16617400 | -0.29948700 |
| C | 2.49967500  | 1.71045300  | 1.95852800  |
| H | 3.17191300  | 2.56631600  | 2.06495100  |
| H | 1.46685100  | 2.06590300  | 2.03090200  |
| H | 2.67996300  | 1.02129000  | 2.78713100  |
| C | 2.22766500  | 1.76684800  | -0.60097100 |
| C | 2.86703700  | 1.30484900  | -1.90722700 |
| H | 2.32232000  | 1.74831300  | -2.74439200 |
| H | 3.91403000  | 1.61363400  | -1.97054800 |
| H | 2.81736700  | 0.21643700  | -2.00758800 |

---

|      |             |             |             |
|------|-------------|-------------|-------------|
| C    | 2.31357400  | 3.27839400  | -0.47447800 |
| H    | 1.73417700  | 3.64417600  | 0.37555300  |
| H    | 3.35417400  | 3.59419500  | -0.35021100 |
| H    | 1.92388000  | 3.74530800  | -1.38314600 |
| H    | -2.58090500 | -1.18902400 | -0.37419000 |
| TS6R |             |             |             |
| P    | -1.48635700 | 0.39324300  | -0.16442400 |
| C    | -2.95488400 | -0.41349300 | -0.92864200 |
| C    | -1.88067600 | 0.62006200  | 1.60142100  |
| C    | -4.29191700 | 0.30898700  | -0.73860400 |
| H    | -2.72880300 | -0.51944500 | -1.99797100 |
| H    | -3.00259000 | -1.42608800 | -0.51093700 |
| C    | -1.40648900 | 2.04384700  | -0.96971500 |
| C    | -0.00913600 | -0.50671000 | -0.33508700 |
| C    | -2.42447400 | -0.65329200 | 2.26109200  |
| H    | -0.95598600 | 0.96270000  | 2.08217300  |
| H    | -2.60555500 | 1.43645000  | 1.68877100  |
| C    | -5.46021200 | -0.49678800 | -1.30863900 |
| H    | -4.26503600 | 1.29112200  | -1.22470300 |
| H    | -4.47313800 | 0.49556700  | 0.32809900  |
| C    | -1.05529900 | 3.19551700  | -0.02142200 |
| H    | -2.35888200 | 2.24630100  | -1.47249900 |
| H    | -0.63881500 | 1.92781000  | -1.74467200 |
| N    | 0.18142700  | -1.15149700 | -1.59288000 |
| C    | 0.79065600  | -1.07920500 | 0.89192000  |
| C    | -2.40372100 | -0.55808700 | 3.78592800  |
| H    | -3.45241600 | -0.83252600 | 1.92071200  |
| H    | -1.84127200 | -1.52743600 | 1.94381400  |
| C    | -6.79526400 | 0.22213800  | -1.14549800 |
| H    | -5.49975200 | -1.47283500 | -0.80950300 |

---

|   |             |             |             |
|---|-------------|-------------|-------------|
| H | -5.27302900 | -0.69800000 | -2.37048300 |
| C | -0.73669400 | 4.48123200  | -0.78522400 |
| H | -1.89863500 | 3.38424500  | 0.65572900  |
| H | -0.19950000 | 2.91374300  | 0.60344800  |
| C | -0.31367600 | -2.48926300 | -1.92972300 |
| C | 0.61629800  | -0.52996800 | -2.73680600 |
| C | 1.30902800  | -2.47694300 | 0.76837600  |
| C | -3.00342500 | -1.79133900 | 4.45266400  |
| H | -2.95187600 | 0.33915400  | 4.09912400  |
| H | -1.36758300 | -0.42011700 | 4.11909000  |
| H | -7.01149100 | 0.41455100  | -0.08962400 |
| H | -6.78797800 | 1.18589700  | -1.66456300 |
| H | -7.61924900 | -0.36995100 | -1.55248400 |
| C | -0.59575400 | 5.68615600  | 0.14032400  |
| H | -1.52790200 | 4.67475000  | -1.52092900 |
| H | 0.18732600  | 4.33562400  | -1.35967600 |
| C | 0.48256200  | -2.75363600 | -3.19923900 |
| H | -0.10065200 | -3.20870000 | -1.13997800 |
| H | -1.39525500 | -2.47110600 | -2.12126900 |
| O | 0.69825800  | -1.44443000 | -3.74180400 |
| O | 0.85447300  | 0.64037100  | -2.92276900 |
| C | 0.74437800  | -3.50948600 | 1.52742800  |
| C | 2.34965900  | -2.80006800 | -0.11552900 |
| H | -2.45643800 | -2.69649000 | 4.16884700  |
| H | -4.04883800 | -1.92904000 | 4.15797200  |
| H | -2.97118200 | -1.71098400 | 5.54240400  |
| H | 0.17155300  | 5.51335000  | 0.90186400  |
| H | -0.32008200 | 6.58725700  | -0.41446900 |
| H | -1.53709400 | 5.88927300  | 0.66169800  |
| H | -0.04395300 | -3.35344100 | -3.94197500 |



---

|   |             |             |             |
|---|-------------|-------------|-------------|
| H | 1.45216300  | -3.20884100 | -2.97066100 |
| C | 1.18191900  | -4.82542800 | 1.39791900  |
| H | -0.05374700 | -3.27434100 | 2.22865900  |
| C | 2.78166900  | -4.11676900 | -0.25263100 |
| H | 2.81503600  | -2.00583100 | -0.69050800 |
| C | 2.19758400  | -5.13645300 | 0.49737600  |
| H | 0.72747900  | -5.60781300 | 1.99869900  |
| H | 3.58656900  | -4.34674500 | -0.94514900 |
| H | 2.53927300  | -6.16120100 | 0.38954300  |
| B | 1.62489600  | 0.18237800  | 0.58028900  |
| O | 2.79993000  | 0.22476600  | -0.17730500 |
| O | 1.45452400  | 1.38891300  | 1.30679900  |
| H | 0.21119100  | -0.97168300 | 1.81104100  |
| C | 3.29674000  | 1.57223700  | -0.11889000 |
| C | 2.73996900  | 2.35015600  | -1.30592300 |
| H | 3.15608100  | 3.36210300  | -1.34826100 |
| H | 2.98469400  | 1.82294800  | -2.22969300 |
| H | 1.64881400  | 2.40506400  | -1.25047600 |
| C | 4.81584900  | 1.52725500  | -0.17843700 |
| H | 5.24189200  | 2.52385600  | -0.02120500 |
| H | 5.22285900  | 0.84670800  | 0.57207600  |
| H | 5.13235500  | 1.17527100  | -1.16442500 |
| C | 2.71329800  | 2.07660800  | 1.23907800  |
| C | 2.47669800  | 3.57698900  | 1.30813800  |
| H | 2.00926600  | 3.83139800  | 2.26477600  |
| H | 3.42406600  | 4.12176900  | 1.23692600  |
| H | 1.82213300  | 3.91581100  | 0.50256400  |
| C | 3.54651000  | 1.62055300  | 2.43798300  |
| H | 3.74342100  | 0.54530600  | 2.38494600  |
| H | 4.50254000  | 2.14925600  | 2.49643500  |

---

|     |             |             |             |
|-----|-------------|-------------|-------------|
| H   | 2.98425800  | 1.81947100  | 3.35460500  |
| M8R |             |             |             |
| P   | -1.39314600 | -0.36443300 | -0.07365900 |
| C   | -2.26225400 | -1.74276500 | -0.90537100 |
| C   | -1.79110200 | -0.48414700 | 1.70049200  |
| C   | -3.78179000 | -1.72068400 | -0.71328000 |
| H   | -2.00808300 | -1.67195200 | -1.97110900 |
| H   | -1.83679000 | -2.68039000 | -0.53058100 |
| C   | -2.09452000 | 1.16807600  | -0.79884000 |
| C   | 0.37105100  | -0.41684700 | -0.32792000 |
| C   | -1.60827200 | -1.90679200 | 2.24496700  |
| H   | -1.13531100 | 0.23585200  | 2.20269200  |
| H   | -2.81978200 | -0.14065300 | 1.85005200  |
| C   | -4.46919900 | -2.86651200 | -1.45629100 |
| H   | -4.19200900 | -0.76579400 | -1.06571300 |
| H   | -4.02290900 | -1.78836100 | 0.35562900  |
| C   | -2.84337800 | 2.08719900  | 0.16588100  |
| H   | -2.73451100 | 0.87370400  | -1.63903700 |
| H   | -1.22575500 | 1.67738500  | -1.22222700 |
| N   | 0.78580300  | -0.95559400 | -1.57875200 |
| C   | 1.34412300  | -0.57329500 | 0.90959000  |
| C   | -1.55412200 | -1.92621200 | 3.77201400  |
| H   | -2.43482600 | -2.54103000 | 1.89974800  |
| H   | -0.68788900 | -2.35441600 | 1.84688700  |
| C   | -5.98230600 | -2.85294800 | -1.26660300 |
| H   | -4.05851200 | -3.82065200 | -1.10408200 |
| H   | -4.22701800 | -2.79793200 | -2.52368300 |
| C   | -3.27731800 | 3.37736100  | -0.52924600 |
| H   | -3.72992500 | 1.58383400  | 0.57481100  |
| H   | -2.18213700 | 2.32776700  | 1.00634400  |

---

|   |             |             |             |
|---|-------------|-------------|-------------|
| C | 1.03388700  | -2.36359600 | -1.87281000 |
| C | 0.74587000  | -0.23257200 | -2.74486700 |
| C | 2.56858300  | -1.39372800 | 0.73484400  |
| C | -1.42456400 | -3.33996100 | 4.32827100  |
| H | -2.45659400 | -1.44764500 | 4.17195500  |
| H | -0.70554400 | -1.31541400 | 4.10418700  |
| H | -6.24659500 | -2.94639100 | -0.20834900 |
| H | -6.41584400 | -1.91858700 | -1.63705300 |
| H | -6.45798500 | -3.67767200 | -1.80364800 |
| C | -3.93614600 | 4.35907300  | 0.43367100  |
| H | -3.96559100 | 3.13605700  | -1.34898100 |
| H | -2.39945100 | 3.84421400  | -0.99401000 |
| C | 1.75149100  | -2.21844800 | -3.21011300 |
| H | 1.65612000  | -2.83090700 | -1.10955700 |
| H | 0.09414900  | -2.92390700 | -1.97161300 |
| O | 1.21512300  | -1.00597500 | -3.75995600 |
| O | 0.32426000  | 0.88556300  | -2.91883000 |
| C | 2.80110700  | -2.49863100 | 1.56791600  |
| C | 3.53467000  | -1.09939000 | -0.24439600 |
| H | -0.51652200 | -3.82568900 | 3.95609400  |
| H | -2.27790900 | -3.95922300 | 4.03333800  |
| H | -1.37662000 | -3.33529400 | 5.42032900  |
| H | -3.24484700 | 4.64127900  | 1.23464100  |
| H | -4.24726900 | 5.27380600  | -0.07808200 |
| H | -4.82349200 | 3.91825500  | 0.90018200  |
| H | 1.55796000  | -3.03034200 | -3.91107500 |
| H | 2.82998000  | -2.09560100 | -3.06611100 |
| C | 3.93564700  | -3.29280800 | 1.42362000  |
| H | 2.07327600  | -2.73748900 | 2.34090400  |
| C | 4.66002800  | -1.90372500 | -0.39840900 |

---

|             |             |             |             |
|-------------|-------------|-------------|-------------|
| H           | 3.39623400  | -0.22538600 | -0.87185900 |
| C           | 4.86753300  | -3.00634100 | 0.42942300  |
| H           | 4.08737500  | -4.14065900 | 2.08548400  |
| H           | 5.39011800  | -1.65749400 | -1.16459000 |
| H           | 5.75022400  | -3.62648900 | 0.30856500  |
| B           | 1.15691200  | 0.89611400  | 0.34502400  |
| O           | 2.19802300  | 1.61471900  | -0.31678800 |
| O           | 0.28422200  | 1.84193800  | 1.01397100  |
| H           | 0.81344400  | -0.82499000 | 1.82679300  |
| C           | 1.94223100  | 3.00759300  | -0.14256000 |
| C           | 1.19990000  | 3.53549800  | -1.36906200 |
| H           | 1.08531100  | 4.62427100  | -1.33511600 |
| H           | 1.76349000  | 3.26626800  | -2.26548500 |
| H           | 0.21440400  | 3.07375900  | -1.45886900 |
| C           | 3.27637200  | 3.72927500  | 0.00103900  |
| H           | 3.12917000  | 4.78543600  | 0.25237600  |
| H           | 3.89476900  | 3.26466900  | 0.77149100  |
| H           | 3.82208800  | 3.67991900  | -0.94591000 |
| C           | 1.05529300  | 3.03571100  | 1.14755200  |
| C           | 0.11292000  | 4.22597900  | 1.24519200  |
| H           | -0.45924500 | 4.16868100  | 2.17717800  |
| H           | 0.66935700  | 5.16938500  | 1.24831000  |
| H           | -0.59113400 | 4.23867700  | 0.40928100  |
| C           | 1.89350200  | 2.91969900  | 2.42325400  |
| H           | 2.59470000  | 2.08283000  | 2.34838700  |
| H           | 2.45801600  | 3.83396600  | 2.63031000  |
| H           | 1.22348100  | 2.72907600  | 3.26689000  |
| <b>TS7R</b> |             |             |             |
| P           | -1.47199700 | -0.14527900 | -0.13383900 |
| C           | -2.46671300 | -1.44818900 | -0.92562000 |

---

|   |             |             |             |
|---|-------------|-------------|-------------|
| C | -1.86936100 | -0.12518900 | 1.65515900  |
| C | -3.97835100 | -1.19176500 | -0.86659600 |
| H | -2.13377300 | -1.50456300 | -1.96794800 |
| H | -2.20049500 | -2.39689300 | -0.44461700 |
| C | -1.91782300 | 1.44111200  | -0.94331900 |
| C | 0.32881100  | -0.46844300 | -0.43751900 |
| C | -2.29950200 | -1.46842500 | 2.26211800  |
| H | -0.96407400 | 0.25393400  | 2.13987600  |
| H | -2.65661800 | 0.61936000  | 1.81121900  |
| C | -4.77331000 | -2.41310000 | -1.32853100 |
| H | -4.23114100 | -0.33371900 | -1.50083700 |
| H | -4.28968500 | -0.92479700 | 0.15119300  |
| C | -2.52519600 | 2.51027700  | -0.03339300 |
| H | -2.59713000 | 1.20361700  | -1.76955400 |
| H | -0.98967100 | 1.80520900  | -1.39428500 |
| N | 0.48430600  | -0.88707300 | -1.83841100 |
| C | 0.86278100  | -1.41227700 | 0.60795000  |
| C | -2.34963500 | -1.38240700 | 3.78765800  |
| H | -3.28778200 | -1.75461300 | 1.88248400  |
| H | -1.61370800 | -2.27130800 | 1.97324500  |
| C | -6.27672600 | -2.15900200 | -1.32578600 |
| H | -4.53686600 | -3.26062700 | -0.67362400 |
| H | -4.44380300 | -2.69615800 | -2.33561100 |
| C | -2.71424400 | 3.82873800  | -0.78252700 |
| H | -3.49465000 | 2.17578000  | 0.35908600  |
| H | -1.86040800 | 2.67227700  | 0.82272200  |
| C | 0.62963100  | -2.26504000 | -2.28773400 |
| C | 0.78833900  | -0.00272500 | -2.83626000 |
| C | 2.15828300  | -1.98932100 | 0.60793400  |
| C | -2.82432000 | -2.68528100 | 4.42186600  |

---

|   |             |             |             |
|---|-------------|-------------|-------------|
| H | -3.01200600 | -0.55925500 | 4.08345500  |
| H | -1.34979800 | -1.12921400 | 4.16020200  |
| H | -6.62842400 | -1.89513000 | -0.32317800 |
| H | -6.53763500 | -1.33575200 | -1.99832600 |
| H | -6.82923200 | -3.04421100 | -1.65100400 |
| C | -3.27853400 | 4.92375600  | 0.11632600  |
| H | -3.37815100 | 3.66932600  | -1.64114900 |
| H | -1.74775500 | 4.14535200  | -1.19325600 |
| C | 1.45710800  | -2.05194800 | -3.55753900 |
| H | 1.15007900  | -2.86333900 | -1.53988000 |
| H | -0.34414700 | -2.72148000 | -2.50435900 |
| O | 1.22075400  | -0.68148200 | -3.92505200 |
| O | 0.68106000  | 1.20472300  | -2.81311100 |
| C | 2.50805100  | -2.93156100 | 1.62501900  |
| C | 3.17954100  | -1.74547600 | -0.36080600 |
| H | -2.16035100 | -3.51391800 | 4.15626000  |
| H | -3.83309900 | -2.94387000 | 4.08393600  |
| H | -2.84591700 | -2.61130700 | 5.51223800  |
| H | -2.60863100 | 5.11879200  | 0.96027600  |
| H | -3.40867100 | 5.86113800  | -0.43085300 |
| H | -4.25326900 | 4.63643100  | 0.52402900  |
| H | 1.15419300  | -2.68647000 | -4.39021000 |
| H | 2.52585800  | -2.17951400 | -3.36138700 |
| C | 3.73872800  | -3.55899400 | 1.66675400  |
| H | 1.76800000  | -3.15794500 | 2.39074200  |
| C | 4.41061000  | -2.38766900 | -0.30391100 |
| H | 3.00798000  | -1.01653500 | -1.14544100 |
| C | 4.71880200  | -3.30453700 | 0.69969000  |
| H | 3.94176600  | -4.26532000 | 2.46901800  |
| H | 5.15089700  | -2.15652500 | -1.06745800 |

---

|            |             |             |             |
|------------|-------------|-------------|-------------|
| H          | 5.68376500  | -3.79850800 | 0.73424300  |
| B          | 1.11180800  | 0.82431900  | -0.00697200 |
| O          | 2.41531200  | 1.12533100  | -0.29256800 |
| O          | 0.50486700  | 1.77117000  | 0.80913600  |
| H          | 0.18494100  | -1.75085000 | 1.37910300  |
| C          | 2.66996200  | 2.44081900  | 0.24590200  |
| C          | 2.45287100  | 3.43639700  | -0.89005200 |
| H          | 2.70062800  | 4.45669300  | -0.58232000 |
| H          | 3.09560800  | 3.15692200  | -1.72824000 |
| H          | 1.41790500  | 3.40607100  | -1.24253800 |
| C          | 4.10361000  | 2.48998000  | 0.74553700  |
| H          | 4.30212400  | 3.43478000  | 1.26230900  |
| H          | 4.31300400  | 1.65969000  | 1.42223700  |
| H          | 4.78794100  | 2.41560100  | -0.10372500 |
| C          | 1.58561600  | 2.55812300  | 1.36559300  |
| C          | 1.08166600  | 3.96665200  | 1.62496900  |
| H          | 0.32834200  | 3.94930000  | 2.41836300  |
| H          | 1.90141300  | 4.61410800  | 1.95233600  |
| H          | 0.63026600  | 4.39952600  | 0.72968000  |
| C          | 2.00723700  | 1.87923500  | 2.66582400  |
| H          | 2.35074300  | 0.85712900  | 2.47714000  |
| H          | 2.80377100  | 2.43454700  | 3.16862800  |
| H          | 1.14490300  | 1.83294800  | 3.33763700  |
| <b>M9R</b> |             |             |             |
| P          | -1.69453600 | 0.15292600  | -0.17349100 |
| C          | -2.80458300 | -1.17096000 | -0.76189400 |
| C          | -2.07744200 | 0.54542100  | 1.56516000  |
| C          | -4.23583400 | -1.08477100 | -0.22524400 |
| H          | -2.80061400 | -1.09619800 | -1.85676900 |
| H          | -2.33651000 | -2.12764400 | -0.50774100 |

---

|   |             |             |             |
|---|-------------|-------------|-------------|
| C | -2.12126300 | 1.63522200  | -1.14097000 |
| C | 0.04535800  | -0.37967800 | -0.53176900 |
| C | -1.75872300 | -0.53431700 | 2.60001000  |
| H | -1.51546500 | 1.45416600  | 1.79359600  |
| H | -3.14637100 | 0.79785000  | 1.57169400  |
| C | -5.14265000 | -2.13398300 | -0.86832400 |
| H | -4.65385100 | -0.08540900 | -0.40821400 |
| H | -4.23162900 | -1.22880800 | 0.86238500  |
| C | -1.56049200 | 2.95098900  | -0.59161200 |
| H | -3.21671100 | 1.66736600  | -1.19582000 |
| H | -1.75257800 | 1.45691100  | -2.15659800 |
| N | 0.20196200  | -0.39737400 | -1.99853700 |
| C | 0.27325400  | -1.69589800 | 0.16271700  |
| C | -2.17609900 | -0.09305100 | 4.00183900  |
| H | -2.26591000 | -1.47478300 | 2.34403000  |
| H | -0.68365900 | -0.73997100 | 2.57380000  |
| C | -6.56369300 | -2.08461000 | -0.31741500 |
| H | -4.71216800 | -3.12861000 | -0.70181100 |
| H | -5.15788300 | -1.97890700 | -1.95391300 |
| C | -1.67608300 | 4.07153600  | -1.62247300 |
| H | -2.10109500 | 3.22782900  | 0.32223800  |
| H | -0.50782400 | 2.82122900  | -0.32182900 |
| C | 0.07641400  | -1.56653700 | -2.85613100 |
| C | 0.67217100  | 0.68019000  | -2.69309000 |
| C | 1.41611100  | -2.52481400 | 0.01704800  |
| C | -1.84257400 | -1.14333300 | 5.05619500  |
| H | -3.25254900 | 0.12091700  | 4.01539900  |
| H | -1.66850600 | 0.84972300  | 4.24306600  |
| H | -6.57292200 | -2.26807600 | 0.76168300  |
| H | -7.02025400 | -1.10522900 | -0.49328400 |



---

|   |             |             |             |
|---|-------------|-------------|-------------|
| H | -7.19873000 | -2.83863300 | -0.78948600 |
| C | -1.17642900 | 5.40500500  | -1.07753200 |
| H | -2.72056500 | 4.16803800  | -1.94657900 |
| H | -1.08985300 | 3.78566200  | -2.50296400 |
| C | 0.97158600  | -1.13688400 | -4.02041600 |
| H | 0.43902100  | -2.46278700 | -2.35264100 |
| H | -0.96284100 | -1.72018500 | -3.17375000 |
| O | 0.99881000  | 0.30062300  | -3.95135100 |
| O | 0.76882100  | 1.82350200  | -2.29835000 |
| C | 1.47493100  | -3.76607300 | 0.72508200  |
| C | 2.53719400  | -2.26352600 | -0.82862500 |
| H | -0.76826400 | -1.35189600 | 5.07321700  |
| H | -2.35948900 | -2.08573300 | 4.84866400  |
| H | -2.13730100 | -0.81304800 | 6.05587900  |
| H | -0.12762800 | 5.33082900  | -0.77219100 |
| H | -1.24905100 | 6.19547400  | -1.82932400 |
| H | -1.75742000 | 5.71876700  | -0.20393000 |
| H | 0.58956800  | -1.42554300 | -4.99927700 |
| H | 1.99250600  | -1.50955800 | -3.89351300 |
| C | 2.53422200  | -4.64481600 | 0.60069300  |
| H | 0.64823500  | -4.01821100 | 1.38684900  |
| C | 3.59388500  | -3.15958000 | -0.94080000 |
| H | 2.58284600  | -1.33153400 | -1.38045300 |
| C | 3.61950600  | -4.36267600 | -0.23777000 |
| H | 2.51730700  | -5.57218400 | 1.16938000  |
| H | 4.42198200  | -2.90345000 | -1.59890500 |
| H | 4.45049500  | -5.05318100 | -0.33280500 |
| B | 1.08219300  | 0.55458900  | 0.20495700  |
| O | 2.41412500  | 0.60265200  | -0.09762800 |
| O | 0.75031400  | 1.32910800  | 1.30181900  |

---

|             |             |             |             |
|-------------|-------------|-------------|-------------|
| H           | -0.54669500 | -2.10897200 | 0.73916700  |
| C           | 3.00974600  | 1.60096400  | 0.75831000  |
| C           | 3.05219300  | 2.90137500  | -0.03881000 |
| H           | 3.55013600  | 3.69874800  | 0.52078900  |
| H           | 3.60404700  | 2.72613300  | -0.96549000 |
| H           | 2.04395100  | 3.22486900  | -0.31293400 |
| C           | 4.41082900  | 1.14572200  | 1.12953400  |
| H           | 4.85521000  | 1.82136300  | 1.86780100  |
| H           | 4.40151200  | 0.13075800  | 1.53080200  |
| H           | 5.04364800  | 1.15174200  | 0.23809400  |
| C           | 2.00356400  | 1.65211500  | 1.95299100  |
| C           | 1.86896200  | 3.00920400  | 2.62009400  |
| H           | 1.14114300  | 2.94820200  | 3.43457500  |
| H           | 2.82679000  | 3.32634200  | 3.04443800  |
| H           | 1.52941800  | 3.76840300  | 1.91235200  |
| C           | 2.25748100  | 0.55670700  | 2.98493400  |
| H           | 2.32681400  | -0.42398300 | 2.50277100  |
| H           | 3.17626600  | 0.74083800  | 3.54857400  |
| H           | 1.42096900  | 0.53441600  | 3.69000300  |
| <b>TS8R</b> |             |             |             |
| P           | 1.14721600  | -1.14257300 | -0.35115900 |
| C           | 2.87779500  | -0.60588000 | -0.61741900 |
| C           | 1.12070000  | -2.11632000 | 1.20475500  |
| C           | 3.96965300  | -1.53225100 | -0.07834300 |
| H           | 2.99686000  | -0.48961600 | -1.70184100 |
| H           | 2.94594100  | 0.40167700  | -0.18183000 |
| C           | 0.76944100  | -2.34808300 | -1.68591300 |
| C           | -0.03117800 | 0.66518400  | -0.37219500 |
| C           | 1.34336900  | -1.29063700 | 2.47325700  |
| H           | 0.13585400  | -2.58914800 | 1.24811000  |

---

|   |             |             |             |
|---|-------------|-------------|-------------|
| H | 1.87543400  | -2.90860500 | 1.11153700  |
| C | 5.36843500  | -1.02626800 | -0.43220100 |
| H | 3.84034700  | -2.54553800 | -0.48309200 |
| H | 3.88555700  | -1.61925200 | 1.01163500  |
| C | -0.48753600 | -3.18058800 | -1.40427800 |
| H | 1.64422900  | -2.99262700 | -1.84081000 |
| H | 0.64241600  | -1.76308000 | -2.60675900 |
| N | -0.18001000 | 1.01290200  | -1.75000200 |
| C | 0.70143800  | 1.61972200  | 0.45263000  |
| C | 1.33981400  | -2.16607300 | 3.72539200  |
| H | 2.29025600  | -0.73673800 | 2.41463400  |
| H | 0.54433100  | -0.54525000 | 2.55222200  |
| C | 6.46739200  | -1.93165200 | 0.11429700  |
| H | 5.49132300  | -0.01033600 | -0.03828400 |
| H | 5.45853500  | -0.94921400 | -1.52277200 |
| C | -1.07607900 | -3.77424000 | -2.68194200 |
| H | -0.23719900 | -3.98420600 | -0.70054400 |
| H | -1.24823300 | -2.55492400 | -0.92326900 |
| C | 0.85581300  | 1.60464100  | -2.59096100 |
| C | -1.04948300 | 0.29557600  | -2.53835400 |
| C | 0.75236400  | 3.04175500  | 0.31475000  |
| C | 1.54480700  | -1.35183600 | 4.99870800  |
| H | 2.12369900  | -2.92952000 | 3.64105500  |
| H | 0.38542500  | -2.70627800 | 3.77752900  |
| H | 6.41555400  | -1.99670700 | 1.20584800  |
| H | 6.37481000  | -2.94719100 | -0.28435500 |
| H | 7.46010700  | -1.55823600 | -0.15066100 |
| C | -2.31428500 | -4.61891600 | -2.40278200 |
| H | -0.31526300 | -4.37837800 | -3.19297800 |
| H | -1.33683200 | -2.94834400 | -3.35397400 |

---

|   |             |             |             |
|---|-------------|-------------|-------------|
| C | 0.08576100  | 1.69919800  | -3.90356300 |
| H | 1.18014500  | 2.57610000  | -2.22088300 |
| H | 1.72075700  | 0.93397700  | -2.67327000 |
| O | -0.85730700 | 0.61335100  | -3.83472000 |
| O | -1.85295200 | -0.53122700 | -2.16653500 |
| C | 1.62259800  | 3.78946800  | 1.16039300  |
| C | -0.04642200 | 3.81993000  | -0.57079000 |
| H | 0.76338500  | -0.59289100 | 5.10905400  |
| H | 2.50824000  | -0.83234500 | 4.98048500  |
| H | 1.52395900  | -1.98717000 | 5.88831300  |
| H | -3.09011700 | -4.01614300 | -1.91899300 |
| H | -2.73630300 | -5.02824100 | -3.32463100 |
| H | -2.08044500 | -5.45828300 | -1.73938900 |
| H | 0.70121100  | 1.56336800  | -4.79188600 |
| H | -0.47136500 | 2.63835700  | -3.97306300 |
| C | 1.70763200  | 5.16885500  | 1.10377000  |
| H | 2.24271700  | 3.24393000  | 1.86880800  |
| C | 0.06202200  | 5.20443700  | -0.63076000 |
| H | -0.79736300 | 3.32268900  | -1.17773600 |
| C | 0.93919700  | 5.90445500  | 0.19507000  |
| H | 2.39206000  | 5.68355100  | 1.77415100  |
| H | -0.57610500 | 5.74854000  | -1.32359400 |
| H | 1.01216600  | 6.98561000  | 0.14711800  |
| B | -1.39802800 | 0.26351300  | 0.29968600  |
| O | -2.49284100 | 1.08266000  | 0.25906800  |
| O | -1.55831000 | -0.82261100 | 1.12847400  |
| H | 1.04688700  | 1.22886100  | 1.40557900  |
| C | -3.55897600 | 0.38763600  | 0.94351400  |
| C | -4.37472600 | -0.34771600 | -0.11606300 |
| H | -5.24796300 | -0.83857500 | 0.32382600  |

---

|   |             |             |             |
|---|-------------|-------------|-------------|
| H | -4.71932300 | 0.37803600  | -0.85714000 |
| H | -3.76447900 | -1.08901200 | -0.63784800 |
| C | -4.41892000 | 1.40943500  | 1.66802400  |
| H | -5.17978900 | 0.91093400  | 2.27750500  |
| H | -3.81609200 | 2.05451100  | 2.30963400  |
| H | -4.92953000 | 2.04006400  | 0.93549900  |
| C | -2.77162200 | -0.58407400 | 1.88457600  |
| C | -3.45168000 | -1.91609800 | 2.14677100  |
| H | -2.81971300 | -2.52849200 | 2.79685800  |
| H | -4.41152400 | -1.76550000 | 2.65085300  |
| H | -3.62392600 | -2.46567500 | 1.21933100  |
| C | -2.34455600 | 0.07270900  | 3.19432200  |
| H | -1.82210600 | 1.01616000  | 3.00446600  |
| H | -3.20113600 | 0.26845200  | 3.84513500  |
| H | -1.66076100 | -0.60018200 | 3.72112300  |

**(Z)- $\alpha$ -product**

|   |             |             |             |
|---|-------------|-------------|-------------|
| C | 0.40498600  | -0.09867900 | -0.07715200 |
| N | 0.81232900  | 1.24670900  | 0.03667000  |
| C | 1.24928500  | -1.14593200 | -0.04208700 |
| C | 1.82857400  | 1.79875700  | 0.92042900  |
| C | 0.07584000  | 2.24491200  | -0.55851300 |
| C | 2.72238400  | -1.14081500 | -0.06475500 |
| C | 1.30015900  | 3.22880000  | 1.08110600  |
| H | 1.86319200  | 1.24928100  | 1.86359900  |
| H | 2.82264600  | 1.77737400  | 0.46344000  |
| O | 0.47503600  | 3.44291400  | -0.07267100 |
| O | -0.77889300 | 2.11119600  | -1.39923600 |
| C | 3.43830700  | -0.24062200 | -0.86705600 |
| C | 3.43671900  | -2.10010900 | 0.66572800  |
| H | 2.08646900  | 3.98307900  | 1.08623600  |

---

|   |             |             |             |
|---|-------------|-------------|-------------|
| H | 0.67887300  | 3.33493600  | 1.97536700  |
| C | 4.82823700  | -0.28244600 | -0.91306400 |
| H | 2.89209100  | 0.47527700  | -1.47550000 |
| C | 4.82605500  | -2.13610900 | 0.62627900  |
| H | 2.89103000  | -2.81835100 | 1.27177800  |
| C | 5.52685500  | -1.22434200 | -0.16081300 |
| H | 5.36647900  | 0.41591500  | -1.54641400 |
| H | 5.36321400  | -2.88054300 | 1.20565200  |
| H | 6.61115500  | -1.25547300 | -0.19698900 |
| B | -1.14452600 | -0.34165400 | -0.06854300 |
| O | -2.00156900 | 0.40512700  | 0.69221700  |
| O | -1.74462900 | -1.38587400 | -0.71484600 |
| H | 0.78108700  | -2.12757500 | -0.00601100 |
| C | -3.33857300 | -0.00312500 | 0.31355400  |
| C | -3.79961300 | 0.94869500  | -0.78633700 |
| H | -4.83373100 | 0.74484800  | -1.07905000 |
| H | -3.73580100 | 1.97378600  | -0.41359500 |
| H | -3.15403500 | 0.87644000  | -1.66517700 |
| C | -4.24642600 | 0.09898400  | 1.52694900  |
| H | -5.24221900 | -0.29193700 | 1.29470600  |
| H | -3.84218000 | -0.45119200 | 2.37867100  |
| H | -4.35274800 | 1.14789700  | 1.81621700  |
| C | -3.09931800 | -1.46011900 | -0.20409400 |
| C | -4.02397400 | -1.89755100 | -1.32639100 |
| H | -3.78188800 | -2.92142100 | -1.62388000 |
| H | -5.06658100 | -1.87673500 | -0.99347300 |
| H | -3.92027400 | -1.25352700 | -2.20104500 |
| C | -3.08846700 | -2.49455700 | 0.91799200  |
| H | -2.43273200 | -2.17897300 | 1.73536200  |
| H | -4.09182600 | -2.66177600 | 1.31929800  |

---

|        |             |             |             |
|--------|-------------|-------------|-------------|
| H      | -2.71164200 | -3.44137900 | 0.52248800  |
| STS1-1 |             |             |             |
| P      | -1.96719800 | -0.51881800 | -0.32601000 |
| C      | -3.35916800 | -1.37796800 | -1.20480200 |
| C      | -2.80031200 | 0.39377000  | 1.04380400  |
| C      | -4.55857100 | -0.51121800 | -1.58970600 |
| H      | -2.89751500 | -1.82752700 | -2.09105200 |
| H      | -3.67694000 | -2.21548800 | -0.57179200 |
| C      | -1.42091800 | 0.78448300  | -1.52918400 |
| C      | 0.07777400  | -0.95361800 | 0.58156100  |
| C      | -3.32821400 | -0.55511400 | 2.12045900  |
| H      | -2.05257600 | 1.06757000  | 1.47465600  |
| H      | -3.60841200 | 1.02278800  | 0.65255500  |
| C      | -5.59152900 | -1.28097000 | -2.41475900 |
| H      | -4.21926500 | 0.36211500  | -2.16366800 |
| H      | -5.04419000 | -0.12015300 | -0.68598200 |
| C      | -1.85464400 | 2.22505900  | -1.24835900 |
| H      | -1.76381900 | 0.46718800  | -2.52174000 |
| H      | -0.32663200 | 0.73137500  | -1.54567400 |
| N      | 0.25715800  | -2.32494000 | 0.54409800  |
| C      | 0.64872800  | 0.08560700  | 0.99025800  |
| C      | -3.97804800 | 0.18921600  | 3.28636000  |
| H      | -4.06032100 | -1.24948000 | 1.68543000  |
| H      | -2.50060700 | -1.17256400 | 2.49620100  |
| C      | -6.79770500 | -0.42387700 | -2.78561400 |
| H      | -5.92078700 | -2.16041100 | -1.84747700 |
| H      | -5.11182400 | -1.66201000 | -3.32445300 |
| C      | -1.24086900 | 3.20985300  | -2.24227600 |
| H      | -2.94936300 | 2.30844800  | -1.27953500 |
| H      | -1.54566600 | 2.51661800  | -0.23601200 |

---

|   |             |             |             |
|---|-------------|-------------|-------------|
| C | 1.22270200  | -2.97369600 | 1.42526300  |
| C | 0.03417800  | -3.09598900 | -0.57974800 |
| C | 0.69610800  | 1.48871400  | 1.24296700  |
| C | -4.49352400 | -0.75407900 | 4.36837500  |
| H | -4.80347100 | 0.80328900  | 2.90505000  |
| H | -3.24905000 | 0.88727000  | 3.71696000  |
| H | -7.30911400 | -0.05702900 | -1.88961400 |
| H | -6.49315900 | 0.44791100  | -3.37386500 |
| H | -7.52412800 | -0.98819000 | -3.37697800 |
| C | -1.59159200 | 4.65648800  | -1.91069700 |
| H | -1.57423900 | 2.96299400  | -3.25833300 |
| H | -0.15067300 | 3.08454700  | -2.23356300 |
| C | 1.04832800  | -4.42419600 | 0.97633600  |
| H | 2.22800500  | -2.58632800 | 1.22924200  |
| H | 0.95912300  | -2.81501200 | 2.47219500  |
| O | 0.54941300  | -4.32760800 | -0.36595900 |
| O | -0.51945500 | -2.78573300 | -1.60600600 |
| C | 1.27732300  | 2.36556700  | 0.30149000  |
| C | 0.17129300  | 2.04258800  | 2.42947400  |
| H | -3.67912200 | -1.35677400 | 4.78347400  |
| H | -5.24236100 | -1.44291700 | 3.96387100  |
| H | -4.95628900 | -0.20476400 | 5.19290100  |
| H | -1.22665100 | 4.91997700  | -0.91207500 |
| H | -1.14701400 | 5.35319100  | -2.62721900 |
| H | -2.67560100 | 4.81244700  | -1.92131400 |
| H | 0.30776600  | -4.95352100 | 1.58317100  |
| H | 1.98092600  | -4.98734100 | 0.95505200  |
| C | 1.28286000  | 3.73770000  | 0.52282300  |
| H | 1.71853700  | 1.94841200  | -0.59944400 |
| C | 0.18712300  | 3.41623000  | 2.64021100  |



---

|        |             |             |             |
|--------|-------------|-------------|-------------|
| H      | -0.25521800 | 1.37823200  | 3.17586500  |
| C      | 0.73361300  | 4.27561100  | 1.68775100  |
| H      | 1.72248900  | 4.39385500  | -0.22377200 |
| H      | -0.23313300 | 3.81903100  | 3.55709400  |
| H      | 0.74037000  | 5.34773200  | 1.85466700  |
| B      | 2.85747400  | -0.96736600 | -1.17468000 |
| O      | 3.24878400  | 0.31221900  | -1.46207200 |
| O      | 3.74880700  | -1.64063700 | -0.38140000 |
| H      | 1.87943600  | -1.46585500 | -1.62355400 |
| C      | 4.61571200  | 0.45151300  | -1.00313000 |
| C      | 4.82245800  | 1.86329400  | -0.48151000 |
| H      | 5.83569700  | 1.97865000  | -0.08314200 |
| H      | 4.69695600  | 2.57638500  | -1.30144700 |
| H      | 4.10429600  | 2.11320700  | 0.30143700  |
| C      | 5.50742700  | 0.19531400  | -2.21581300 |
| H      | 6.56440700  | 0.33746800  | -1.97427700 |
| H      | 5.36867000  | -0.82016900 | -2.59875900 |
| H      | 5.23521000  | 0.89712900  | -3.00816500 |
| C      | 4.72262300  | -0.67075700 | 0.08160100  |
| C      | 4.27165700  | -0.20560100 | 1.46239600  |
| H      | 4.20051400  | -1.07386700 | 2.12402500  |
| H      | 4.98735900  | 0.49774100  | 1.89747900  |
| H      | 3.28686800  | 0.26916200  | 1.41576200  |
| C      | 6.08090000  | -1.34696300 | 0.16486800  |
| H      | 6.35204900  | -1.82287800 | -0.77904100 |
| H      | 6.85537000  | -0.62002600 | 0.42950900  |
| H      | 6.05890700  | -2.11644400 | 0.94130600  |
| STS1-2 |             |             |             |
| P      | -2.02948000 | 0.42735400  | -0.61466900 |
| C      | -2.57795600 | 2.15074900  | -0.22686000 |

---

|   |             |             |             |
|---|-------------|-------------|-------------|
| C | -2.81380900 | 0.08152300  | -2.25938300 |
| C | -2.05552400 | 2.63957800  | 1.13914400  |
| H | -2.15936700 | 2.77562400  | -1.02587600 |
| H | -3.66837100 | 2.24608000  | -0.28965000 |
| C | -2.88451300 | -0.60501700 | 0.66273100  |
| C | 0.68566600  | -0.87077300 | 0.46300200  |
| C | -4.34347700 | 0.05082200  | -2.39405200 |
| H | -2.39557500 | 0.86192000  | -2.90763000 |
| H | -2.38254000 | -0.86635000 | -2.59811000 |
| C | -1.53082700 | 4.07381500  | 1.08357200  |
| H | -1.24431700 | 1.99283100  | 1.49898600  |
| H | -2.85260800 | 2.56988400  | 1.88919400  |
| C | -4.26992100 | -0.15820800 | 1.13715400  |
| H | -2.19771100 | -0.64852000 | 1.51836100  |
| H | -2.92245100 | -1.61848200 | 0.25161100  |
| N | 0.33573500  | -2.17459700 | 0.66198100  |
| C | 0.26251100  | 0.22619300  | -0.00716100 |
| C | -4.95949500 | -1.31385500 | -2.08445600 |
| H | -4.80320800 | 0.82296600  | -1.76321600 |
| H | -4.60874300 | 0.31679700  | -3.42570900 |
| C | -0.97537500 | 4.54411700  | 2.42249000  |
| H | -2.33530900 | 4.74276800  | 0.75138700  |
| H | -0.74279000 | 4.12484400  | 0.32155600  |
| C | -4.92505300 | -1.20162800 | 2.04231200  |
| H | -4.18818000 | 0.79068400  | 1.68105400  |
| H | -4.93044700 | 0.03413500  | 0.28288900  |
| C | 1.16073200  | -3.09455600 | 1.44862100  |
| C | -0.48483200 | -2.89103200 | -0.19311100 |
| C | 0.77813700  | 1.56571000  | -0.28408400 |
| C | -6.48358200 | -1.28107500 | -2.12253400 |

---

|   |             |             |             |
|---|-------------|-------------|-------------|
| H | -4.62462800 | -1.66779700 | -1.10329600 |
| H | -4.58121200 | -2.04245400 | -2.81151400 |
| H | -1.74606600 | 4.52873200  | 3.20072600  |
| H | -0.15768500 | 3.89259000  | 2.74914200  |
| H | -0.58375700 | 5.56339900  | 2.35833700  |
| C | -6.28433600 | -0.75065900 | 2.56691600  |
| H | -4.25523700 | -1.42099800 | 2.88343200  |
| H | -5.03591600 | -2.13989200 | 1.48318700  |
| C | 0.32273100  | -4.36575400 | 1.34390500  |
| H | 2.15313500  | -3.19114900 | 0.99984200  |
| H | 1.26261700  | -2.74121200 | 2.47570900  |
| O | -0.41446500 | -4.20356600 | 0.12269900  |
| O | -1.15883700 | -2.47052500 | -1.10172800 |
| C | 1.54004800  | 2.22059000  | 0.69438600  |
| C | 0.58254400  | 2.19657500  | -1.51835900 |
| H | -6.84588700 | -0.94511200 | -3.09998100 |
| H | -6.88001700 | -0.58979500 | -1.37015200 |
| H | -6.91229900 | -2.26798600 | -1.92785700 |
| H | -6.97606100 | -0.55045800 | 1.74187000  |
| H | -6.74052700 | -1.51126700 | 3.20660200  |
| H | -6.19324500 | 0.16917400  | 3.15378500  |
| H | -0.39105400 | -4.45555800 | 2.16837400  |
| H | 0.91488200  | -5.27723200 | 1.26914200  |
| C | 2.09718700  | 3.46907000  | 0.43745800  |
| H | 1.70216100  | 1.72796900  | 1.64764200  |
| C | 1.14284200  | 3.44532400  | -1.77415000 |
| H | 0.00749400  | 1.68536900  | -2.28623900 |
| C | 1.90329600  | 4.08712200  | -0.79777700 |
| H | 2.68730700  | 3.95892400  | 1.20607400  |
| H | 0.99100100  | 3.91417800  | -2.74164700 |

---

|        |             |             |             |
|--------|-------------|-------------|-------------|
| H      | 2.33920500  | 5.06104000  | -0.99672500 |
| B      | 3.67242300  | -0.62687800 | 1.44839800  |
| O      | 4.02000000  | -1.76237500 | 0.76195200  |
| O      | 4.22048900  | 0.51002500  | 0.92853500  |
| H      | 3.04185700  | -0.64216400 | 2.45447200  |
| C      | 5.03402500  | -1.38224400 | -0.19971400 |
| C      | 4.82683200  | -2.18834700 | -1.47070800 |
| H      | 5.52610000  | -1.86735200 | -2.24928600 |
| H      | 5.00913400  | -3.24719300 | -1.26656700 |
| H      | 3.80756900  | -2.08163500 | -1.84626100 |
| C      | 6.38178400  | -1.71972900 | 0.43298800  |
| H      | 7.20916000  | -1.51688800 | -0.25275100 |
| H      | 6.53915500  | -1.14556900 | 1.35088500  |
| H      | 6.39661100  | -2.78223700 | 0.68929000  |
| C      | 4.79781200  | 0.15846500  | -0.35259900 |
| C      | 3.76679100  | 0.50082200  | -1.42315200 |
| H      | 2.84383400  | -0.06771300 | -1.27391100 |
| H      | 3.52246500  | 1.56489600  | -1.35433100 |
| H      | 4.15575100  | 0.29614500  | -2.42510900 |
| C      | 6.05993400  | 0.98071100  | -0.55493200 |
| H      | 6.75595100  | 0.86514700  | 0.27788100  |
| H      | 6.56556700  | 0.68893300  | -1.48104800 |
| H      | 5.79166800  | 2.03791600  | -0.63193200 |
| STS1-3 |             |             |             |
| P      | -1.77234500 | -0.14592100 | 0.03917500  |
| C      | -3.41125800 | 0.51850900  | -0.56605300 |
| C      | -2.03372000 | -1.97632300 | -0.05998300 |
| C      | -4.67991900 | 0.00314200  | 0.11469800  |
| H      | -3.35983400 | 1.61319800  | -0.46121800 |
| H      | -3.46010600 | 0.31670400  | -1.64443000 |

---

|   |             |             |             |
|---|-------------|-------------|-------------|
| C | -1.95346900 | 0.19862400  | 1.85751700  |
| C | 0.47096400  | 1.48820600  | -0.75702500 |
| C | -2.43190900 | -2.44777000 | -1.45906900 |
| H | -1.07554700 | -2.41978100 | 0.23270900  |
| H | -2.78642600 | -2.28535800 | 0.67681000  |
| C | -5.95355400 | 0.55169500  | -0.52964900 |
| H | -4.66810200 | 0.27624500  | 1.17682100  |
| H | -4.70323700 | -1.09398200 | 0.07545400  |
| C | -0.65895400 | 0.05546500  | 2.65541300  |
| H | -2.73400700 | -0.45008900 | 2.27592400  |
| H | -2.31540000 | 1.23230300  | 1.94109100  |
| N | -0.33130300 | 2.51808000  | -0.88252200 |
| C | 1.48032000  | 0.71787700  | -0.84166800 |
| C | -2.41246500 | -3.97049700 | -1.58774800 |
| H | -3.43777300 | -2.07997000 | -1.70680400 |
| H | -1.74759600 | -2.01718500 | -2.20240900 |
| C | -7.21937200 | 0.05118100  | 0.15894800  |
| H | -5.97107600 | 0.26663900  | -1.58939900 |
| H | -5.92707900 | 1.64866300  | -0.50403000 |
| C | -0.83171200 | 0.48791100  | 4.10980900  |
| H | -0.30642700 | -0.98150400 | 2.60632700  |
| H | 0.12155000  | 0.66249600  | 2.18081700  |
| C | -1.09531200 | 2.81533800  | -2.09747200 |
| C | -0.86891200 | 3.21220800  | 0.23330100  |
| C | 2.81664400  | 1.35492500  | -1.02044200 |
| C | -2.84652300 | -4.44665500 | -2.97021700 |
| H | -3.06668700 | -4.40656700 | -0.82201400 |
| H | -1.39907400 | -4.33025400 | -1.37246800 |
| H | -7.27776600 | -1.04153700 | 0.12413900  |
| H | -7.23683600 | 0.35057400  | 1.21181000  |

---

|   |             |             |             |
|---|-------------|-------------|-------------|
| H | -8.12009000 | 0.44912000  | -0.31668900 |
| C | 0.46087700  | 0.36553000  | 4.91062400  |
| H | -1.61829800 | -0.11617600 | 4.58089900  |
| H | -1.18169300 | 1.52783600  | 4.13332600  |
| C | -1.85012400 | 4.07166100  | -1.65245500 |
| H | -0.42512900 | 2.99400700  | -2.93759400 |
| H | -1.75712900 | 1.97200600  | -2.31772900 |
| O | -1.82203000 | 4.03671400  | -0.21302600 |
| O | -0.53560100 | 3.07773900  | 1.37243100  |
| C | 3.71368600  | 0.87788800  | -1.98272400 |
| C | 3.18623400  | 2.43906200  | -0.21218300 |
| H | -2.18948800 | -4.04137100 | -3.74656300 |
| H | -3.86763100 | -4.12108700 | -3.19569500 |
| H | -2.81994300 | -5.53729500 | -3.04663400 |
| H | 1.24355000  | 1.00254800  | 4.48549100  |
| H | 0.32007100  | 0.66243400  | 5.95418600  |
| H | 0.83151500  | -0.66555700 | 4.90464700  |
| H | -2.89238700 | 4.08048500  | -1.96763900 |
| H | -1.35288600 | 4.98774400  | -1.97788300 |
| C | 4.94939400  | 1.49839300  | -2.14447100 |
| H | 3.44306700  | 0.01837300  | -2.58246800 |
| C | 4.43096100  | 3.03972500  | -0.36759900 |
| H | 2.49743000  | 2.78649700  | 0.55337500  |
| C | 5.31423200  | 2.57490100  | -1.33920000 |
| H | 5.63628900  | 1.12794400  | -2.89915400 |
| H | 4.70936400  | 3.87121500  | 0.27231200  |
| H | 6.28515100  | 3.04410600  | -1.46287300 |
| B | 1.34209100  | -1.14099600 | -0.80532200 |
| O | 2.63970000  | -1.64477400 | -1.14074700 |
| O | 1.04190000  | -1.55601200 | 0.53422900  |

---

|        |             |             |             |
|--------|-------------|-------------|-------------|
| H      | 0.45611600  | -1.30924000 | -1.61710300 |
| C      | 3.07254100  | -2.50850100 | -0.09406600 |
| C      | 4.58367100  | -2.39296500 | 0.05205200  |
| H      | 4.94494300  | -2.97438200 | 0.90739900  |
| H      | 5.06891600  | -2.77933700 | -0.84944500 |
| H      | 4.88665100  | -1.35109300 | 0.17736400  |
| C      | 2.68970600  | -3.93743100 | -0.48704100 |
| H      | 3.05608200  | -4.67757400 | 0.23135400  |
| H      | 1.60247400  | -4.03245500 | -0.56824200 |
| H      | 3.12368600  | -4.15981800 | -1.46579700 |
| C      | 2.25746200  | -1.99847800 | 1.13844900  |
| C      | 2.93353400  | -0.81720500 | 1.83669800  |
| H      | 2.22318800  | -0.36748100 | 2.53646900  |
| H      | 3.81653100  | -1.13587400 | 2.40015300  |
| H      | 3.24248200  | -0.05261700 | 1.11940800  |
| C      | 1.92954900  | -3.07422900 | 2.16616600  |
| H      | 1.29186900  | -3.85040700 | 1.73775300  |
| H      | 2.84336400  | -3.54058700 | 2.55020700  |
| H      | 1.39999500  | -2.62778000 | 3.01392300  |
| STS1-4 |             |             |             |
| P      | -1.50990600 | 0.34652200  | -0.51066900 |
| C      | -2.24782800 | 0.98691800  | 1.05630300  |
| C      | -2.40359900 | 1.30760200  | -1.82596700 |
| C      | -1.61003100 | 0.31903500  | 2.27737900  |
| H      | -2.06589100 | 2.06874900  | 1.08291000  |
| H      | -3.33552700 | 0.84444000  | 1.05835000  |
| C      | -2.16103800 | -1.39470200 | -0.59149100 |
| C      | 1.73872800  | 0.60665700  | -0.95761100 |
| C      | -3.92426900 | 1.17607400  | -1.99932700 |
| H      | -2.15390900 | 2.34838200  | -1.59509200 |

---

|   |             |             |             |
|---|-------------|-------------|-------------|
| H | -1.89574600 | 1.07796900  | -2.77157300 |
| C | -2.00555800 | 0.98927500  | 3.59066300  |
| H | -0.51812600 | 0.33261200  | 2.16617000  |
| H | -1.88348300 | -0.74436700 | 2.30663000  |
| C | -3.56786000 | -1.67446800 | -0.05395600 |
| H | -1.43349600 | -1.99985900 | -0.04252600 |
| H | -2.07380900 | -1.69506600 | -1.64293500 |
| N | 3.07771400  | 0.68180400  | -1.24605800 |
| C | 0.85436300  | 1.36280300  | -0.48036500 |
| C | -4.34768800 | 0.03650400  | -2.92691400 |
| H | -4.41425000 | 1.07095800  | -1.02311600 |
| H | -4.30843000 | 2.11403300  | -2.42090600 |
| C | -1.33124200 | 0.34439600  | 4.79721400  |
| H | -3.09601000 | 0.95083100  | 3.70722100  |
| H | -1.73727900 | 2.05266700  | 3.53871200  |
| C | -4.01899500 | -3.09845000 | -0.38275900 |
| H | -3.57903200 | -1.53821400 | 1.03483500  |
| H | -4.30299800 | -0.96933300 | -0.45784400 |
| C | 3.92936100  | 1.78526800  | -0.81869300 |
| C | 3.65260200  | 0.03092300  | -2.33184400 |
| C | 0.41764000  | 2.59758400  | 0.13986300  |
| C | -5.86139400 | -0.14230100 | -2.96751100 |
| H | -3.87652000 | -0.90220600 | -2.61623300 |
| H | -3.96891700 | 0.24641000  | -3.93470000 |
| H | -1.59752200 | -0.71481400 | 4.87718800  |
| H | -0.24029900 | 0.40652000  | 4.71373900  |
| H | -1.62140000 | 0.83256800  | 5.73193500  |
| C | -5.38585900 | -3.43033300 | 0.20709600  |
| H | -3.26959800 | -3.80870400 | -0.01177900 |
| H | -4.04640200 | -3.22166900 | -1.47338700 |



---

|   |             |             |             |
|---|-------------|-------------|-------------|
| C | 5.28023900  | 1.26836400  | -1.30772500 |
| H | 3.62976800  | 2.72138300  | -1.30655200 |
| H | 3.88699900  | 1.91517500  | 0.26483700  |
| O | 4.95095300  | 0.42544600  | -2.41726400 |
| O | 3.13362900  | -0.70275000 | -3.12360900 |
| C | 0.59941500  | 2.79831800  | 1.51769400  |
| C | -0.13091000 | 3.63683600  | -0.62855600 |
| H | -6.35827100 | 0.77876500  | -3.29032700 |
| H | -6.25197400 | -0.39600300 | -1.97546000 |
| H | -6.15426100 | -0.93996700 | -3.65562400 |
| H | -6.15279700 | -2.74518200 | -0.16949500 |
| H | -5.69560400 | -4.44810900 | -0.04603000 |
| H | -5.37342700 | -3.34627300 | 1.29870900  |
| H | 5.78114100  | 0.66757900  | -0.54196800 |
| H | 5.95195400  | 2.05263800  | -1.65692800 |
| C | 0.21328600  | 3.99465100  | 2.11325600  |
| H | 1.04748000  | 2.00706400  | 2.11090500  |
| C | -0.52019200 | 4.82898300  | -0.02763300 |
| H | -0.23570900 | 3.49891900  | -1.70019900 |
| C | -0.35875200 | 5.00771700  | 1.34548000  |
| H | 0.35952500  | 4.13600200  | 3.17973600  |
| H | -0.94343700 | 5.62383400  | -0.63359000 |
| H | -0.66615700 | 5.93746300  | 1.81324700  |
| B | 1.19033700  | -1.47904700 | -0.71415700 |
| O | 2.42096500  | -2.13187300 | -0.79589700 |
| O | 0.68512200  | -1.57672600 | 0.59469000  |
| H | 0.43032000  | -1.38381600 | -1.63663400 |
| C | 2.65449200  | -2.80918000 | 0.44390200  |
| C | 4.14337100  | -2.76938800 | 0.75282500  |
| H | 4.35390800  | -3.20089800 | 1.73710500  |

---

|     |            |             |             |
|-----|------------|-------------|-------------|
| H   | 4.68716600 | -3.34889300 | 0.00181400  |
| H   | 4.52166600 | -1.74496500 | 0.72676400  |
| C   | 2.19127000 | -4.25456600 | 0.26170700  |
| H   | 2.40070300 | -4.86577300 | 1.14488800  |
| H   | 1.11779700 | -4.29188200 | 0.05306800  |
| H   | 2.71781000 | -4.68577000 | -0.59352900 |
| C   | 1.75410400 | -2.01521900 | 1.44304000  |
| C   | 2.46069400 | -0.78618000 | 2.01683700  |
| H   | 2.92209700 | -0.19001600 | 1.22443800  |
| H   | 1.72237500 | -0.16590600 | 2.53427400  |
| H   | 3.23335700 | -1.07231500 | 2.73713200  |
| C   | 1.16482700 | -2.84143200 | 2.57654300  |
| H   | 0.52718100 | -3.64101300 | 2.19461200  |
| H   | 1.95600500 | -3.28395700 | 3.19080600  |
| H   | 0.55554200 | -2.19812800 | 3.21957700  |
| SM1 |            |             |             |
| P   | 2.09028000 | -0.04905900 | -0.12297700 |
| C   | 1.73660000 | 0.33603600  | -1.86696700 |
| C   | 2.77743000 | 1.40401200  | 0.73375900  |
| C   | 1.22449800 | -0.85850300 | -2.69027900 |
| H   | 1.00026200 | 1.14458900  | -1.82241800 |
| H   | 2.65974500 | 0.74401500  | -2.29640900 |
| C   | 3.36065900 | -1.35375800 | -0.06047300 |
| C   | 0.68031100 | -0.70664100 | 0.81582100  |
| C   | 3.52423000 | 2.39024700  | -0.16781700 |
| H   | 1.93096400 | 1.89878500  | 1.21548400  |
| H   | 3.42633400 | 1.00263800  | 1.52242400  |
| C   | 2.31163400 | -1.68332200 | -3.37989800 |
| H   | 0.55534500 | -0.45963600 | -3.45991100 |
| H   | 0.58386900 | -1.50260900 | -2.07154400 |

---

|   |             |             |             |
|---|-------------|-------------|-------------|
| C | 4.69549900  | -0.96345800 | -0.70109200 |
| H | 2.93537500  | -2.24425000 | -0.53764400 |
| H | 3.50006300  | -1.59242100 | 0.99911600  |
| N | 0.83835600  | -2.07177600 | 1.20811200  |
| C | -0.42165200 | -0.01212900 | 1.18005000  |
| C | 4.26343200  | 3.44470400  | 0.65622800  |
| H | 4.24572700  | 1.87318500  | -0.81262900 |
| H | 2.79881100  | 2.87329100  | -0.83472700 |
| C | 1.71255900  | -2.82052300 | -4.20188300 |
| H | 3.01622400  | -2.09696100 | -2.64905100 |
| H | 2.89907900  | -1.02356700 | -4.03116100 |
| C | 5.65147500  | -2.15482700 | -0.76359700 |
| H | 4.54398800  | -0.57238300 | -1.71569000 |
| H | 5.16020200  | -0.15857400 | -0.11773900 |
| C | -0.01916300 | -3.14356000 | 0.70769500  |
| C | 1.46918100  | -2.44204900 | 2.36735200  |
| C | -1.31276400 | -0.66283300 | 2.18579700  |
| C | 4.86054300  | 4.54255700  | -0.21710200 |
| H | 5.05422800  | 2.95225600  | 1.23548700  |
| H | 3.57411600  | 3.88356700  | 1.38770500  |
| H | 1.14611000  | -3.50680600 | -3.56346900 |
| H | 1.02510000  | -2.43386500 | -4.96084000 |
| H | 2.48752200  | -3.39845000 | -4.71236400 |
| C | 7.00418200  | -1.77932600 | -1.35844500 |
| H | 5.19027400  | -2.95187400 | -1.36066700 |
| H | 5.78562900  | -2.56089400 | 0.24608500  |
| C | -0.11632700 | -4.01643400 | 1.96025900  |
| H | -0.98270800 | -2.75260500 | 0.37295800  |
| H | 0.46721200  | -3.66439300 | -0.12680900 |
| O | 1.05921800  | -3.67978400 | 2.72072200  |

---

|   |             |             |             |
|---|-------------|-------------|-------------|
| O | 2.29098000  | -1.80369500 | 2.98593400  |
| C | -2.58815000 | -1.12015100 | 1.84476700  |
| C | -0.86773200 | -0.80809900 | 3.50619600  |
| H | 4.07593300  | 5.07479500  | -0.76501500 |
| H | 5.55644100  | 4.12634300  | -0.95294700 |
| H | 5.40646500  | 5.27596000  | 0.38203800  |
| H | 7.49468800  | -1.00497400 | -0.76012000 |
| H | 7.67335800  | -2.64262000 | -1.40019600 |
| H | 6.89197000  | -1.39324300 | -2.37675200 |
| H | -0.09457800 | -5.08654700 | 1.75683600  |
| H | -0.99852500 | -3.76180000 | 2.55758200  |
| C | -3.39924300 | -1.72364200 | 2.80291900  |
| H | -2.90732500 | -1.03285600 | 0.81255600  |
| C | -1.68522300 | -1.40201200 | 4.46357600  |
| H | 0.12481400  | -0.45804800 | 3.77549800  |
| C | -2.95306800 | -1.86437400 | 4.11527200  |
| H | -4.38541900 | -2.08284900 | 2.52177400  |
| H | -1.32720900 | -1.50663100 | 5.48303900  |
| H | -3.58849500 | -2.32961000 | 4.86235200  |
| B | -1.00305300 | 1.36527700  | 0.56266100  |
| O | -0.11230100 | 2.22870800  | -0.17751500 |
| O | -1.74141400 | 2.17846400  | 1.47687100  |
| H | -0.90878200 | 0.51883300  | -2.04751300 |
| C | -0.48819200 | 3.58684100  | 0.09187700  |
| C | -0.56986600 | 4.34128500  | -1.22924900 |
| H | -0.92710000 | 5.36587300  | -1.07899900 |
| H | 0.42504000  | 4.39492900  | -1.68429500 |
| H | -1.23601000 | 3.83356600  | -1.92998700 |
| C | 0.59081100  | 4.21285900  | 0.97467100  |
| H | 0.38301400  | 5.26637500  | 1.18483100  |

---

|   |             |             |             |
|---|-------------|-------------|-------------|
| H | 0.67354400  | 3.67878300  | 1.92668700  |
| H | 1.55193000  | 4.15968200  | 0.45537300  |
| C | -1.85989100 | 3.44915600  | 0.84825500  |
| C | -3.06316600 | 3.43099200  | -0.10087100 |
| H | -3.94879300 | 3.15790500  | 0.48123800  |
| H | -3.23689800 | 4.41609200  | -0.54618200 |
| H | -2.95004900 | 2.69842000  | -0.90445400 |
| C | -2.09384500 | 4.50090200  | 1.92594400  |
| H | -1.33475600 | 4.44670800  | 2.70849600  |
| H | -2.09435500 | 5.51020400  | 1.50045900  |
| H | -3.06893500 | 4.32835500  | 2.39027200  |
| B | -1.99346300 | 0.18733000  | -1.66866000 |
| O | -2.28512300 | -1.17612100 | -1.36551900 |
| O | -3.10022500 | 0.77341100  | -2.31655800 |
| H | -1.87935000 | 0.79951300  | -0.28831300 |
| C | -3.52302700 | -1.49577600 | -2.01468100 |
| C | -4.28917000 | -2.51501200 | -1.18443400 |
| H | -5.25187800 | -2.74855700 | -1.65151700 |
| H | -3.71303200 | -3.44307300 | -1.11572800 |
| H | -4.47812600 | -2.15536100 | -0.17081200 |
| C | -3.17069000 | -2.09433400 | -3.37840400 |
| H | -4.05584300 | -2.43963300 | -3.92097200 |
| H | -2.64419200 | -1.35896200 | -3.99459800 |
| H | -2.50402600 | -2.94779900 | -3.22348500 |
| C | -4.21798600 | -0.10070200 | -2.14019900 |
| C | -4.96387100 | 0.31893000  | -0.87249200 |
| H | -5.29424700 | 1.35472000  | -0.99119200 |
| H | -5.84627400 | -0.30309600 | -0.69315100 |
| H | -4.31519800 | 0.27911600  | 0.00818400  |
| C | -5.13889600 | 0.03455400  | -3.34501300 |

---

|      |             |             |             |
|------|-------------|-------------|-------------|
| H    | -4.59345000 | -0.10746000 | -4.27978700 |
| H    | -5.95522300 | -0.69416900 | -3.29731700 |
| H    | -5.57853700 | 1.03582500  | -3.35893600 |
| STS2 |             |             |             |
| P    | 1.97312800  | -0.24375400 | 0.15095500  |
| C    | 1.80588900  | -0.17659000 | -1.67359500 |
| C    | 2.91964600  | 1.20965800  | 0.74057200  |
| C    | 1.17029000  | -1.43928300 | -2.28160100 |
| H    | 1.19163100  | 0.70426800  | -1.87203400 |
| H    | 2.80162900  | 0.01002300  | -2.09448700 |
| C    | 2.99175100  | -1.70574400 | 0.52993600  |
| C    | 0.45572900  | -0.41726700 | 1.06443100  |
| C    | 3.78437600  | 1.90453700  | -0.31085000 |
| H    | 2.19245500  | 1.91470000  | 1.15187500  |
| H    | 3.52288100  | 0.84373500  | 1.58114500  |
| C    | 2.16630600  | -2.48464000 | -2.78334900 |
| H    | 0.54127600  | -1.12214900 | -3.12133800 |
| H    | 0.45970900  | -1.88940200 | -1.57738900 |
| C    | 4.40235400  | -1.64912200 | -0.06364300 |
| H    | 2.44370300  | -2.58471600 | 0.17009400  |
| H    | 3.03830700  | -1.77762500 | 1.62083100  |
| N    | 0.22769200  | -1.70134500 | 1.63993900  |
| C    | -0.57329700 | 0.52290400  | 1.08830900  |
| C    | 4.63967000  | 3.01128900  | 0.30550200  |
| H    | 4.44051100  | 1.18461000  | -0.81631400 |
| H    | 3.12653200  | 2.32535300  | -1.08247700 |
| C    | 1.45632800  | -3.65040700 | -3.46540400 |
| H    | 2.77769900  | -2.86790600 | -1.95747200 |
| H    | 2.86443400  | -2.01337600 | -3.48766800 |
| C    | 5.15411900  | -2.96141500 | 0.15890500  |

---

|   |             |             |             |
|---|-------------|-------------|-------------|
| H | 4.36755600  | -1.43574600 | -1.13982700 |
| H | 4.96359500  | -0.82857900 | 0.40209200  |
| C | -0.81501000 | -2.61589300 | 1.18525700  |
| C | 0.77976100  | -2.11909400 | 2.81755300  |
| C | -1.61860600 | 0.41028100  | 2.16784200  |
| C | 5.37653200  | 3.82643900  | -0.75176000 |
| H | 5.35824700  | 2.56235700  | 1.00208000  |
| H | 4.00172900  | 3.67086300  | 0.90713500  |
| H | 0.74610800  | -4.12764200 | -2.78122400 |
| H | 0.89395600  | -3.30662200 | -4.33939300 |
| H | 2.16426500  | -4.41318500 | -3.80133700 |
| C | 6.57507100  | -2.91496300 | -0.39210700 |
| H | 4.59661800  | -3.77742300 | -0.31836700 |
| H | 5.17472600  | -3.18620800 | 1.23191900  |
| C | -1.02858600 | -3.44665100 | 2.45231300  |
| H | -1.70368700 | -2.06449700 | 0.87131400  |
| H | -0.47083600 | -3.20989100 | 0.32971500  |
| O | 0.17098800  | -3.25790200 | 3.22245800  |
| O | 1.68875100  | -1.60434300 | 3.43406800  |
| C | -2.97525500 | 0.63948900  | 1.91223900  |
| C | -1.21732600 | 0.15406500  | 3.48549800  |
| H | 4.66996800  | 4.31781400  | -1.42957300 |
| H | 6.02687400  | 3.18784200  | -1.35836800 |
| H | 5.99849400  | 4.60215700  | -0.29747600 |
| H | 7.15856400  | -2.12557300 | 0.09246500  |
| H | 7.09594800  | -3.86225600 | -0.22993600 |
| H | 6.57221500  | -2.71481400 | -1.46855300 |
| H | -1.15025200 | -4.51339000 | 2.26429000  |
| H | -1.87417900 | -3.07460800 | 3.03919300  |
| C | -3.90949600 | 0.57618700  | 2.94119500  |

---

|   |             |             |             |
|---|-------------|-------------|-------------|
| H | -3.29007400 | 0.85494000  | 0.89543600  |
| C | -2.15445300 | 0.09547700  | 4.51420300  |
| H | -0.16233800 | 0.01960500  | 3.70604100  |
| C | -3.50547800 | 0.29648300  | 4.24484800  |
| H | -4.95925200 | 0.74514900  | 2.72010500  |
| H | -1.82242100 | -0.10642200 | 5.52793200  |
| H | -4.23695400 | 0.24301700  | 5.04526300  |
| B | -0.53834200 | 1.92674800  | 0.38980000  |
| O | 0.39167100  | 2.31518300  | -0.54671100 |
| O | -1.44617500 | 2.91044700  | 0.67501500  |
| H | -1.10854500 | 0.57586900  | -2.08880100 |
| C | 0.14712800  | 3.71323800  | -0.84709900 |
| C | 0.36797200  | 3.93045700  | -2.33401600 |
| H | 0.10468400  | 4.95475200  | -2.61645200 |
| H | 1.42388500  | 3.77438400  | -2.57703100 |
| H | -0.22875700 | 3.23437300  | -2.92653900 |
| C | 1.14719700  | 4.52554400  | -0.03039500 |
| H | 1.04438800  | 5.59655900  | -0.22544000 |
| H | 1.01417200  | 4.35210900  | 1.04228900  |
| H | 2.16161000  | 4.22580700  | -0.30831900 |
| C | -1.33093000 | 3.90510500  | -0.36676900 |
| C | -2.36052200 | 3.55277800  | -1.43653800 |
| H | -3.34840700 | 3.51227300  | -0.97031500 |
| H | -2.38145000 | 4.30598600  | -2.22987200 |
| H | -2.16511200 | 2.57238900  | -1.87876400 |
| C | -1.63127700 | 5.27036300  | 0.22936000  |
| H | -1.01031800 | 5.47441300  | 1.10344800  |
| H | -1.46902900 | 6.05847200  | -0.51286900 |
| H | -2.67861700 | 5.30663800  | 0.53985300  |
| B | -1.95270100 | -0.05914000 | -1.46360800 |



---

|      |             |             |             |
|------|-------------|-------------|-------------|
| O    | -1.84258100 | -1.49666300 | -1.47380200 |
| O    | -3.31715300 | 0.27951600  | -1.75197600 |
| H    | -1.58561100 | 0.33937700  | -0.18960600 |
| C    | -2.99559600 | -1.99780100 | -2.14148000 |
| C    | -3.29521800 | -3.40150600 | -1.63391000 |
| H    | -4.21766900 | -3.79320700 | -2.07596300 |
| H    | -2.47617300 | -4.07292800 | -1.91162200 |
| H    | -3.39600400 | -3.41959900 | -0.54610300 |
| C    | -2.68709000 | -2.04291400 | -3.64113200 |
| H    | -3.50674700 | -2.47982200 | -4.22017400 |
| H    | -2.48555800 | -1.03659100 | -4.02124900 |
| H    | -1.79170000 | -2.65273200 | -3.79561000 |
| C    | -4.07832100 | -0.92548100 | -1.79565600 |
| C    | -4.71099700 | -1.17544200 | -0.42553600 |
| H    | -5.28044200 | -0.28831800 | -0.13160100 |
| H    | -5.39382000 | -2.03119800 | -0.44440100 |
| H    | -3.94497400 | -1.35487400 | 0.33487800  |
| C    | -5.17425200 | -0.77106300 | -2.84291800 |
| H    | -4.76119700 | -0.44654000 | -3.79995300 |
| H    | -5.71449200 | -1.71251500 | -2.99132300 |
| H    | -5.89375500 | -0.01582100 | -2.51266100 |
| STS3 |             |             |             |
| P    | 1.48669100  | -0.04905100 | -0.09679200 |
| C    | 3.06674100  | 0.31279700  | 0.74793100  |
| C    | 1.27608900  | -1.85776000 | -0.00562100 |
| C    | 4.23239800  | -0.61646800 | 0.40067900  |
| H    | 3.31527400  | 1.34889900  | 0.50321000  |
| H    | 2.84584300  | 0.27374000  | 1.82197700  |
| C    | 1.57427800  | 0.36050600  | -1.87972900 |
| C    | 0.17709400  | 0.79509000  | 0.71144200  |

---

|   |             |             |             |
|---|-------------|-------------|-------------|
| C | 1.20156800  | -2.38780200 | 1.42524800  |
| H | 0.35345900  | -2.10234500 | -0.54130400 |
| H | 2.11255200  | -2.30721100 | -0.55483300 |
| C | 5.49718300  | -0.23500700 | 1.17088800  |
| H | 4.44095800  | -0.56703500 | -0.67520500 |
| H | 3.97787800  | -1.65956000 | 0.62663900  |
| C | 2.18966200  | -0.67554500 | -2.82342400 |
| H | 2.09225200  | 1.32401100  | -1.93151800 |
| H | 0.52752300  | 0.54644400  | -2.15868600 |
| N | 0.52430100  | 2.01002000  | 1.39578700  |
| C | -1.28609800 | 0.75098100  | 0.12634300  |
| C | 1.04581500  | -3.90622700 | 1.45563700  |
| H | 2.10256300  | -2.10355400 | 1.98651300  |
| H | 0.34572200  | -1.92273900 | 1.92376100  |
| C | 6.67655000  | -1.14096200 | 0.83329900  |
| H | 5.28796100  | -0.28144300 | 2.24683900  |
| H | 5.75240100  | 0.80794800  | 0.94884900  |
| C | 2.24201700  | -0.16032200 | -4.26213300 |
| H | 3.20439800  | -0.94075600 | -2.50056100 |
| H | 1.60080600  | -1.60064200 | -2.79561600 |
| C | -0.03945100 | 2.36666700  | 2.69098000  |
| C | 1.27586200  | 3.03022700  | 0.89717400  |
| C | -1.88206600 | 2.03567500  | -0.30722700 |
| C | 0.83656300  | -4.44062400 | 2.86824600  |
| H | 1.92791400  | -4.37654500 | 1.00242700  |
| H | 0.18995100  | -4.18124500 | 0.82711300  |
| H | 6.45088600  | -2.18559700 | 1.07116800  |
| H | 6.91966400  | -1.08748100 | -0.23276900 |
| H | 7.57095000  | -0.85652600 | 1.39395800  |
| C | 2.82867200  | -1.18674800 | -5.22564800 |

---

|   |             |             |             |
|---|-------------|-------------|-------------|
| H | 2.83574800  | 0.76116800  | -4.29182800 |
| H | 1.22893500  | 0.11385100  | -4.58033900 |
| C | 0.17956000  | 3.87985300  | 2.68711900  |
| H | -1.10242400 | 2.11305400  | 2.73686500  |
| H | 0.49006800  | 1.85181800  | 3.50167500  |
| O | 1.25045300  | 4.08081400  | 1.75395500  |
| O | 1.95184600  | 3.03602400  | -0.11511300 |
| C | -3.22879500 | 2.34076100  | -0.03463400 |
| C | -1.12416600 | 3.01490800  | -0.97036900 |
| H | -0.06292300 | -4.00677400 | 3.31735900  |
| H | 1.68429000  | -4.18879500 | 3.51413900  |
| H | 0.72434000  | -5.52849700 | 2.87413000  |
| H | 2.23248400  | -2.10501300 | -5.23220400 |
| H | 2.85951000  | -0.80171100 | -6.24844700 |
| H | 3.85072900  | -1.45581000 | -4.93928400 |
| H | 0.48176300  | 4.28626700  | 3.65205600  |
| H | -0.70461000 | 4.40934600  | 2.31872100  |
| C | -3.78834500 | 3.55377900  | -0.41636200 |
| H | -3.83591700 | 1.60175700  | 0.47969900  |
| C | -1.68183900 | 4.23487800  | -1.34490300 |
| H | -0.08219000 | 2.81257400  | -1.19922900 |
| C | -3.01726100 | 4.51567800  | -1.06961000 |
| H | -4.83232500 | 3.75572300  | -0.19273900 |
| H | -1.06405400 | 4.96870000  | -1.85503600 |
| H | -3.45156800 | 5.46836200  | -1.35632800 |
| B | -2.07015800 | -0.53563000 | -0.00382800 |
| O | -1.72021900 | -1.77536000 | 0.55304400  |
| O | -3.30159300 | -0.62213300 | -0.64961700 |
| C | -2.68181000 | -2.74095800 | 0.09176500  |
| C | -2.90886200 | -3.77714400 | 1.18114900  |

---

|     |             |             |             |
|-----|-------------|-------------|-------------|
| H   | -3.72848500 | -4.45055700 | 0.90938000  |
| H   | -2.00743800 | -4.38247400 | 1.31665500  |
| H   | -3.14568900 | -3.30220200 | 2.13524700  |
| C   | -2.11726000 | -3.40252900 | -1.16473400 |
| H   | -2.78752000 | -4.17707500 | -1.54848400 |
| H   | -1.95281900 | -2.66059300 | -1.95301500 |
| H   | -1.15872300 | -3.87283000 | -0.92696600 |
| C   | -3.91878800 | -1.84404400 | -0.22386600 |
| C   | -4.74407000 | -1.53039000 | 1.02451500  |
| H   | -5.46326400 | -0.74344600 | 0.78154200  |
| H   | -5.29696800 | -2.40514700 | 1.37914600  |
| H   | -4.10195500 | -1.16963400 | 1.83468800  |
| C   | -4.81979100 | -2.35878100 | -1.33477400 |
| H   | -4.28057600 | -2.43481300 | -2.28071700 |
| H   | -5.22984100 | -3.34172900 | -1.08029900 |
| H   | -5.65537800 | -1.66797800 | -1.47672600 |
| H   | -0.89444200 | 0.43018000  | 1.31442900  |
| SM2 |             |             |             |
| P   | -1.17550400 | -0.13010300 | 0.16497100  |
| C   | -2.92212500 | 0.31651000  | -0.15795500 |
| C   | -1.08226800 | -1.94954500 | -0.06439800 |
| C   | -4.00192800 | -0.53086000 | 0.53434500  |
| H   | -3.03740500 | 1.37149500  | 0.10417400  |
| H   | -3.02379400 | 0.23753900  | -1.24744100 |
| C   | -0.78263100 | 0.16153000  | 1.93730200  |
| C   | -0.20732100 | 0.69828000  | -1.03496300 |
| C   | -1.83391500 | -2.45713500 | -1.29873600 |
| H   | -0.01665600 | -2.17935000 | -0.15978600 |
| H   | -1.43926400 | -2.44109800 | 0.84913900  |
| C   | -5.29816600 | -0.54645000 | -0.27699100 |

---

|   |             |             |             |
|---|-------------|-------------|-------------|
| H | -4.21072200 | -0.12523300 | 1.52872100  |
| H | -3.66870900 | -1.56400400 | 0.69024500  |
| C | -1.79158000 | -0.30550000 | 2.98873400  |
| H | -0.61496100 | 1.24096100  | 2.01197000  |
| H | 0.18141700  | -0.33975800 | 2.08660300  |
| N | -0.82623400 | 1.89643900  | -1.53428500 |
| C | 1.32541400  | 0.85622700  | -0.94311200 |
| C | -1.39213200 | -3.86558100 | -1.69024100 |
| H | -2.91632800 | -2.45046300 | -1.11633300 |
| H | -1.65272400 | -1.78724000 | -2.14729800 |
| C | -6.41057500 | -1.32317900 | 0.41861200  |
| H | -5.09675200 | -0.98607700 | -1.26246500 |
| H | -5.61994000 | 0.48646300  | -0.45852000 |
| C | -1.18932000 | -0.27191300 | 4.39427000  |
| H | -2.67262600 | 0.34541300  | 2.96467400  |
| H | -2.14464400 | -1.32344700 | 2.77520300  |
| C | -0.99962500 | 2.14614000  | -2.95395400 |
| C | -1.23926200 | 2.96218800  | -0.79158300 |
| C | 1.76984400  | 2.09670400  | -0.17336600 |
| C | -2.13256900 | -4.38124600 | -2.91930200 |
| H | -1.54640900 | -4.54773200 | -0.84386400 |
| H | -0.31642400 | -3.83493000 | -1.89538200 |
| H | -6.11388700 | -2.36324400 | 0.59010000  |
| H | -6.64954600 | -0.88116400 | 1.39118200  |
| H | -7.32634000 | -1.33143900 | -0.17864400 |
| C | -2.19308700 | -0.67456100 | 5.46951900  |
| H | -0.81123600 | 0.73775300  | 4.59599100  |
| H | -0.31996800 | -0.94099200 | 4.42644400  |
| C | -1.25321100 | 3.65814400  | -2.95930500 |
| H | -0.10025400 | 1.87540700  | -3.51595800 |

---

|   |             |             |             |
|---|-------------|-------------|-------------|
| H | -1.84245600 | 1.56800400  | -3.35427700 |
| O | -1.63821700 | 3.96979500  | -1.61549400 |
| O | -1.33787800 | 3.03721700  | 0.41521600  |
| C | 1.90604500  | 3.31131600  | -0.85431700 |
| C | 2.00441500  | 2.08698800  | 1.20637200  |
| H | -1.94465700 | -3.73087300 | -3.77965100 |
| H | -3.21434800 | -4.40952300 | -2.74953600 |
| H | -1.81052100 | -5.39133700 | -3.18786800 |
| H | -2.56974000 | -1.68801500 | 5.29571300  |
| H | -1.74367700 | -0.65190400 | 6.46614600  |
| H | -3.05317700 | 0.00268200  | 5.47573500  |
| H | -2.05743200 | 3.96477100  | -3.62904600 |
| H | -0.34720200 | 4.22277400  | -3.20217600 |
| C | 2.23289400  | 4.48528800  | -0.18097900 |
| H | 1.75318100  | 3.32981900  | -1.93202000 |
| C | 2.34280400  | 3.25558200  | 1.88295300  |
| H | 1.91751400  | 1.15348900  | 1.75551000  |
| C | 2.45007000  | 4.46130800  | 1.19366100  |
| H | 2.32049200  | 5.41791100  | -0.73036600 |
| H | 2.52123400  | 3.22478400  | 2.95381100  |
| H | 2.70510600  | 5.37372200  | 1.72340300  |
| B | 2.15568200  | -0.39748200 | -0.46870800 |
| O | 1.91888300  | -1.11370300 | 0.68126500  |
| O | 3.27213000  | -0.83632400 | -1.13664200 |
| C | 3.08270200  | -1.94034400 | 0.92832100  |
| C | 2.62361900  | -3.25386600 | 1.53750400  |
| H | 3.47156500  | -3.93188900 | 1.67614000  |
| H | 2.17595100  | -3.06503300 | 2.51746600  |
| H | 1.87871500  | -3.74722000 | 0.90970000  |
| C | 3.96122600  | -1.16926800 | 1.90958700  |

---

|      |             |             |             |
|------|-------------|-------------|-------------|
| H    | 4.85000400  | -1.74234300 | 2.18740600  |
| H    | 4.27824600  | -0.21143500 | 1.48536700  |
| H    | 3.38498100  | -0.96619400 | 2.81682800  |
| C    | 3.71482400  | -2.05931100 | -0.49875000 |
| C    | 3.14258500  | -3.21862800 | -1.30905800 |
| H    | 3.49883300  | -3.13703900 | -2.34017300 |
| H    | 3.47020600  | -4.18254400 | -0.90984500 |
| H    | 2.04959800  | -3.18459800 | -1.33024300 |
| C    | 5.23382200  | -2.09732400 | -0.51679500 |
| H    | 5.66387800  | -1.19687700 | -0.07510200 |
| H    | 5.60237200  | -2.97094400 | 0.03021600  |
| H    | 5.58402600  | -2.17134600 | -1.54967400 |
| O    | 0.70179300  | -1.56723000 | -2.68033100 |
| H    | 1.61308400  | -1.27871100 | -2.81159700 |
| H    | 0.23666500  | -0.78627500 | -2.28868000 |
| H    | 1.66554700  | 1.02416000  | -1.97933100 |
| STS4 |             |             |             |
| P    | -1.22145100 | -0.25245600 | 0.12477300  |
| C    | -2.99273300 | -0.03491200 | -0.29163600 |
| C    | -0.95138200 | -2.06623900 | 0.13197800  |
| C    | -4.00363100 | -0.92594600 | 0.44342000  |
| H    | -3.23349000 | 1.02024800  | -0.13780400 |
| H    | -3.04037400 | -0.22675900 | -1.37131500 |
| C    | -0.88209000 | 0.26653800  | 1.84936400  |
| C    | -0.28540800 | 0.52710900  | -1.16480600 |
| C    | -1.48877500 | -2.79197100 | -1.10486600 |
| H    | 0.12985700  | -2.20893000 | 0.22508300  |
| H    | -1.40736900 | -2.46391000 | 1.04705100  |
| C    | -5.32514300 | -1.00679000 | -0.32241900 |
| H    | -4.19600000 | -0.52546200 | 1.44300600  |

---

|   |             |             |             |
|---|-------------|-------------|-------------|
| H | -3.61513800 | -1.94099000 | 0.58786800  |
| C | -1.91036200 | -0.10619200 | 2.91867200  |
| H | -0.74809100 | 1.35111100  | 1.80717200  |
| H | 0.09242700  | -0.18673800 | 2.07433500  |
| N | -1.02412900 | 1.59833200  | -1.78953800 |
| C | 1.21453500  | 0.88958000  | -0.99863400 |
| C | -0.88323400 | -4.18750800 | -1.24458400 |
| H | -2.58281900 | -2.86950900 | -1.05755600 |
| H | -1.25883000 | -2.21605600 | -2.00925700 |
| C | -6.37594600 | -1.82623400 | 0.41888400  |
| H | -5.13941400 | -1.44656700 | -1.31076200 |
| H | -5.70064300 | 0.00840800  | -0.50013700 |
| C | -1.37030500 | 0.16195500  | 4.32413300  |
| H | -2.82036500 | 0.48624400  | 2.76750400  |
| H | -2.20199800 | -1.16235400 | 2.84098700  |
| C | -1.14776700 | 1.71860200  | -3.22948800 |
| C | -1.56680100 | 2.67330400  | -1.15233300 |
| C | 1.48742200  | 2.15282900  | -0.20644300 |
| C | -1.43671300 | -4.94548100 | -2.44635900 |
| H | -1.06718600 | -4.75910000 | -0.32604100 |
| H | 0.20376500  | -4.07805000 | -1.33806000 |
| H | -6.02613600 | -2.84963100 | 0.59012200  |
| H | -6.60137400 | -1.38449800 | 1.39474800  |
| H | -7.31037400 | -1.88281900 | -0.14594000 |
| C | -2.39775400 | -0.13784000 | 5.41054700  |
| H | -1.05260800 | 1.20971600  | 4.38921400  |
| H | -0.47080500 | -0.44572600 | 4.48343300  |
| C | -1.57128100 | 3.18679900  | -3.37147700 |
| H | -0.19322500 | 1.51773600  | -3.72605100 |
| H | -1.89605300 | 1.01715800  | -3.62037600 |



---

|   |             |             |             |
|---|-------------|-------------|-------------|
| O | -2.02800400 | 3.56743000  | -2.06877100 |
| O | -1.71798400 | 2.83274600  | 0.04087300  |
| C | 1.45584600  | 3.39423800  | -0.85320000 |
| C | 1.73761700  | 2.14291200  | 1.17035100  |
| H | -1.23938500 | -4.40065600 | -3.37549300 |
| H | -2.52037900 | -5.07989100 | -2.36401200 |
| H | -0.98406100 | -5.93663200 | -2.53876800 |
| H | -2.71524100 | -1.18520800 | 5.37299200  |
| H | -1.99236400 | 0.05230300  | 6.40811200  |
| H | -3.28997200 | 0.48463300  | 5.28840900  |
| H | -2.38518500 | 3.33916100  | -4.08127900 |
| H | -0.72881500 | 3.82876100  | -3.64730300 |
| C | 1.62423700  | 4.58409000  | -0.15082800 |
| H | 1.29364700  | 3.42205700  | -1.92961600 |
| C | 1.91387500  | 3.32850800  | 1.87845800  |
| H | 1.79082300  | 1.19036600  | 1.68655600  |
| C | 1.84823600  | 4.55575300  | 1.22266600  |
| H | 1.58164300  | 5.53353000  | -0.67636200 |
| H | 2.10479700  | 3.29333600  | 2.94740500  |
| H | 1.97828500  | 5.48074000  | 1.77577700  |
| B | 2.12672200  | -0.37968100 | -0.63685000 |
| O | 2.01125000  | -1.05400400 | 0.59786200  |
| O | 3.45306900  | -0.43582900 | -1.09055300 |
| C | 3.30986200  | -1.54931600 | 0.96662400  |
| C | 3.15410900  | -2.93937000 | 1.56664300  |
| H | 4.13075900  | -3.37810900 | 1.79642500  |
| H | 2.58574900  | -2.87266500 | 2.49925500  |
| H | 2.61886500  | -3.60902400 | 0.88997900  |
| C | 3.88638100  | -0.59438500 | 2.01086500  |
| H | 4.84802200  | -0.94889500 | 2.39389300  |

---

|     |             |             |             |
|-----|-------------|-------------|-------------|
| H   | 4.02108100  | 0.40733500  | 1.59344300  |
| H   | 3.18850700  | -0.52473700 | 2.85136300  |
| C   | 4.10040900  | -1.50398400 | -0.38636900 |
| C   | 3.94913100  | -2.78997500 | -1.20304900 |
| H   | 4.34269400  | -2.61175700 | -2.20859000 |
| H   | 4.51352900  | -3.61509600 | -0.75821200 |
| H   | 2.90145000  | -3.08676500 | -1.28985900 |
| C   | 5.57793500  | -1.16567500 | -0.24568300 |
| H   | 5.72019500  | -0.17863600 | 0.19740300  |
| H   | 6.09290700  | -1.90957000 | 0.37114400  |
| H   | 6.04569400  | -1.16339500 | -1.23442700 |
| O   | 1.20837300  | -1.52230900 | -1.88270600 |
| H   | 1.72606400  | -1.42452600 | -2.69376400 |
| H   | 0.40158800  | -0.86599500 | -1.92718600 |
| H   | 1.52714100  | 1.12606900  | -2.03130700 |
| SM3 |             |             |             |
| P   | -1.31763900 | -0.26003700 | 0.06211800  |
| C   | -3.07197700 | 0.17428100  | -0.22930100 |
| C   | -1.15100300 | -2.04665000 | -0.24015900 |
| C   | -4.11559700 | -0.81759100 | 0.29783400  |
| H   | -3.22486300 | 1.16867100  | 0.20070100  |
| H   | -3.17103700 | 0.27707600  | -1.31757800 |
| C   | -0.80260500 | 0.02453800  | 1.78133000  |
| C   | -0.33910800 | 0.66279000  | -1.23547600 |
| C   | -1.60279300 | -2.53777800 | -1.61601500 |
| H   | -0.09196400 | -2.27661100 | -0.08127400 |
| H   | -1.73031300 | -2.52822900 | 0.55912500  |
| C   | -5.52740400 | -0.38668500 | -0.10307000 |
| H   | -4.05951100 | -0.88977300 | 1.38845600  |
| H   | -3.92460400 | -1.82346700 | -0.09341600 |

---

|   |             |             |             |
|---|-------------|-------------|-------------|
| C | -1.80547000 | -0.43744900 | 2.84195700  |
| H | -0.60494600 | 1.09332700  | 1.87895400  |
| H | 0.14409300  | -0.52307000 | 1.85996300  |
| N | -1.00831700 | 1.91223200  | -1.58247600 |
| C | 1.20127500  | 0.78703600  | -1.08964100 |
| C | -1.31942800 | -4.03155700 | -1.76946200 |
| H | -2.67141200 | -2.34253700 | -1.77727700 |
| H | -1.03712200 | -2.00811200 | -2.38706500 |
| C | -6.59268600 | -1.34613900 | 0.41656800  |
| H | -5.58597200 | -0.32274300 | -1.19678200 |
| H | -5.71791600 | 0.62361600  | 0.27842400  |
| C | -1.19332800 | -0.33363300 | 4.23967600  |
| H | -2.70772900 | 0.18479200  | 2.79706700  |
| H | -2.11749900 | -1.47499500 | 2.66413000  |
| C | -0.92006900 | 2.44636400  | -2.93112000 |
| C | -1.32619700 | 2.88022600  | -0.67349300 |
| C | 1.61302100  | 1.97778300  | -0.25736300 |
| C | -1.75528800 | -4.56775400 | -3.12862100 |
| H | -1.82424900 | -4.58787200 | -0.96932500 |
| H | -0.24219800 | -4.18278500 | -1.63442000 |
| H | -6.43477700 | -2.35717100 | 0.02754200  |
| H | -6.57066000 | -1.40237800 | 1.50950900  |
| H | -7.59480300 | -1.02644000 | 0.11895700  |
| C | -2.17265200 | -0.74746700 | 5.33270100  |
| H | -0.85977200 | 0.69750700  | 4.40676800  |
| H | -0.29579800 | -0.96276300 | 4.28289700  |
| C | -1.18241600 | 3.94459900  | -2.68596900 |
| H | 0.07090700  | 2.27106500  | -3.36107400 |
| H | -1.67119900 | 1.98751400  | -3.58242000 |
| O | -1.55572300 | 4.04896900  | -1.30727300 |

---

|   |             |             |             |
|---|-------------|-------------|-------------|
| O | -1.47299600 | 2.73856000  | 0.52135100  |
| C | 1.78828500  | 3.22650500  | -0.86963100 |
| C | 1.80677100  | 1.90708900  | 1.12567200  |
| H | -1.23764100 | -4.04325500 | -3.93820900 |
| H | -2.83184900 | -4.43501800 | -3.27999300 |
| H | -1.53390900 | -5.63397200 | -3.22719300 |
| H | -2.50134300 | -1.78277500 | 5.19508500  |
| H | -1.71794400 | -0.67087200 | 6.32388900  |
| H | -3.06309200 | -0.11064000 | 5.32367400  |
| H | -1.99994400 | 4.33648800  | -3.29196700 |
| H | -0.28878900 | 4.55267700  | -2.84631700 |
| C | 2.11529000  | 4.36356100  | -0.13467400 |
| H | 1.68189200  | 3.30193900  | -1.95113600 |
| C | 2.13891100  | 3.03708700  | 1.86820700  |
| H | 1.71003300  | 0.94471800  | 1.61071700  |
| C | 2.28587700  | 4.27339900  | 1.24371500  |
| H | 2.24065900  | 5.31732800  | -0.63913100 |
| H | 2.28686000  | 2.94969100  | 2.94102800  |
| H | 2.53921200  | 5.15527000  | 1.82383600  |
| B | 1.92480500  | -0.69366000 | -0.87680700 |
| O | 1.79711900  | -1.24214500 | 0.49788500  |
| O | 3.36456400  | -0.62908100 | -1.11430300 |
| C | 3.05936500  | -1.73558600 | 0.93123300  |
| C | 2.87241900  | -3.13853700 | 1.50550300  |
| H | 3.83030700  | -3.58742500 | 1.79161600  |
| H | 2.24608800  | -3.08366100 | 2.40261000  |
| H | 2.37682900  | -3.79725000 | 0.78881400  |
| C | 3.59613100  | -0.82137500 | 2.03647800  |
| H | 4.51352000  | -1.21947600 | 2.48251000  |
| H | 3.80036900  | 0.18063700  | 1.65264100  |

---

|      |             |             |             |
|------|-------------|-------------|-------------|
| H    | 2.84361100  | -0.73943700 | 2.82948800  |
| C    | 3.95224700  | -1.67733600 | -0.36416100 |
| C    | 3.90304500  | -2.98793700 | -1.16700700 |
| H    | 4.37068400  | -2.81172900 | -2.14149100 |
| H    | 4.45311400  | -3.79258600 | -0.66764400 |
| H    | 2.87428900  | -3.31321500 | -1.33313000 |
| C    | 5.41553000  | -1.32974100 | -0.10617300 |
| H    | 5.51476000  | -0.33751500 | 0.33738400  |
| H    | 5.89114400  | -2.06345300 | 0.55411600  |
| H    | 5.95885000  | -1.32827700 | -1.05620100 |
| O    | 1.24809600  | -1.59734500 | -1.85575600 |
| H    | 1.87655400  | -1.73929300 | -2.57017500 |
| H    | -0.48900900 | -0.00948600 | -2.08842200 |
| H    | 1.50752200  | 1.02526700  | -2.12112700 |
| STS5 |             |             |             |
| P    | -1.32215900 | -0.37436300 | 0.02988000  |
| C    | -2.88533400 | -0.93160200 | -0.75479000 |
| C    | -0.53215100 | -1.87587400 | 0.68613800  |
| C    | -3.62311400 | -2.07807900 | -0.05269100 |
| H    | -3.52332200 | -0.04880300 | -0.83621100 |
| H    | -2.61674500 | -1.22129400 | -1.77892200 |
| C    | -1.60346300 | 0.72970400  | 1.45158600  |
| C    | -0.09567400 | 0.34340700  | -1.19258000 |
| C    | -0.25072800 | -2.96354100 | -0.35808100 |
| H    | 0.40714300  | -1.55678700 | 1.14648800  |
| H    | -1.19479300 | -2.24512600 | 1.47984200  |
| C    | -4.91207600 | -2.43567200 | -0.79404800 |
| H    | -3.86920200 | -1.79689200 | 0.97729500  |
| H    | -2.98755100 | -2.96925600 | 0.00936800  |
| C    | -2.81446300 | 0.37427100  | 2.31620200  |

---

|   |             |             |             |
|---|-------------|-------------|-------------|
| H | -1.69885400 | 1.74185700  | 1.05231600  |
| H | -0.67928800 | 0.69426200  | 2.03944200  |
| N | -0.81785600 | 1.02823500  | -2.28268600 |
| C | 1.08604100  | 1.05565000  | -0.57592400 |
| C | 0.01270700  | -4.31803400 | 0.29919400  |
| H | -1.08689800 | -3.06715300 | -1.06248700 |
| H | 0.63205700  | -2.66690500 | -0.93171800 |
| C | -5.66617800 | -3.57741800 | -0.12061600 |
| H | -4.66801800 | -2.70907200 | -1.82801500 |
| H | -5.55285100 | -1.54759800 | -0.85024800 |
| C | -2.93121800 | 1.33177200  | 3.50293400  |
| H | -3.73045200 | 0.43236800  | 1.71455300  |
| H | -2.73869500 | -0.65575900 | 2.68953100  |
| C | -0.08711400 | 1.39030600  | -3.49215600 |
| C | -1.87079300 | 1.87704200  | -2.10513100 |
| C | 0.86763200  | 2.29384300  | 0.21543900  |
| C | 0.37217100  | -5.39312300 | -0.72058000 |
| H | -0.87285300 | -4.62541000 | 0.87092400  |
| H | 0.82756400  | -4.21007800 | 1.02625800  |
| H | -5.05250800 | -4.48308600 | -0.07853500 |
| H | -5.94225300 | -3.31407100 | 0.90545300  |
| H | -6.58455200 | -3.82114600 | -0.66116700 |
| C | -4.14555700 | 1.02889400  | 4.37386000  |
| H | -2.98596100 | 2.35942600  | 3.12509800  |
| H | -2.01524300 | 1.27176400  | 4.10307000  |
| C | -1.18539000 | 2.12677700  | -4.25474900 |
| H | 0.76378900  | 2.03727200  | -3.25255500 |
| H | 0.28462300  | 0.50647800  | -4.01446600 |
| O | -2.06211600 | 2.61026700  | -3.22473500 |
| O | -2.58110000 | 1.98849100  | -1.12665700 |

---

|   |             |             |             |
|---|-------------|-------------|-------------|
| C | 0.17075100  | 3.40315500  | -0.30136700 |
| C | 1.35273700  | 2.42324100  | 1.53234300  |
| H | 1.26998900  | -5.11484200 | -1.28153000 |
| H | -0.43882400 | -5.53563400 | -1.44252800 |
| H | 0.56185000  | -6.35542100 | -0.23743400 |
| H | -4.09640100 | 0.01294400  | 4.77943300  |
| H | -4.21260600 | 1.72164500  | 5.21689900  |
| H | -5.07258100 | 1.11355100  | 3.79771600  |
| H | -1.75439100 | 1.45505300  | -4.90475000 |
| H | -0.82522300 | 2.97953000  | -4.82920500 |
| C | -0.09672500 | 4.53155200  | 0.46893000  |
| H | -0.15359800 | 3.39744900  | -1.33796800 |
| C | 1.10912700  | 3.55779700  | 2.29851600  |
| H | 1.93210600  | 1.60498700  | 1.94952400  |
| C | 0.36260100  | 4.61521200  | 1.78076900  |
| H | -0.65437100 | 5.35568100  | 0.03297800  |
| H | 1.49602800  | 3.61240400  | 3.31263600  |
| H | 0.15892400  | 5.49558300  | 2.38226900  |
| B | 2.37451600  | 0.14920300  | -0.34750300 |
| O | 2.35365800  | -1.26556700 | -0.21167700 |
| O | 3.49899300  | 0.66330600  | 0.33394400  |
| C | 3.45978700  | -1.65127000 | 0.61140100  |
| C | 4.03733700  | -2.95961500 | 0.09067000  |
| H | 4.93552800  | -3.24453900 | 0.64914900  |
| H | 3.29830300  | -3.75909500 | 0.21132900  |
| H | 4.28802300  | -2.88714400 | -0.96906700 |
| C | 2.94022500  | -1.84896700 | 2.03717100  |
| H | 3.73151400  | -2.17227500 | 2.72008500  |
| H | 2.50488900  | -0.92028000 | 2.42173500  |
| H | 2.16347800  | -2.61979500 | 2.03450600  |

---

|     |             |             |             |
|-----|-------------|-------------|-------------|
| C   | 4.41736200  | -0.41952200 | 0.50654300  |
| C   | 5.33597200  | -0.50253800 | -0.71604000 |
| H   | 5.81251800  | 0.47239900  | -0.86039700 |
| H   | 6.12480600  | -1.24755800 | -0.57222700 |
| H   | 4.77058600  | -0.75049200 | -1.61696800 |
| C   | 5.25171200  | -0.15034300 | 1.75125600  |
| H   | 4.61975200  | 0.06507000  | 2.61528600  |
| H   | 5.89467600  | -1.00519800 | 1.98685200  |
| H   | 5.89288200  | 0.71872500  | 1.57810400  |
| O   | 2.79906400  | 0.47152800  | -2.22080100 |
| H   | 3.59576200  | 1.01651100  | -2.17386800 |
| H   | 0.29236100  | -0.57516800 | -1.65764400 |
| H   | 1.90858700  | 1.12635300  | -1.68789300 |
| SM4 |             |             |             |
| P   | -1.63307300 | -0.48148600 | -0.68186500 |
| C   | -2.58810800 | 0.04148600  | -2.15455400 |
| C   | -0.32165300 | -1.55318600 | -1.37800600 |
| C   | -3.90145900 | 0.81441600  | -1.96448300 |
| H   | -1.89237400 | 0.59175200  | -2.79982900 |
| H   | -2.78808500 | -0.90820100 | -2.67086700 |
| C   | -2.78596700 | -1.38098300 | 0.39978900  |
| C   | -0.97534500 | 1.00640500  | 0.12237400  |
| C   | -0.44057900 | -3.05938300 | -1.11153700 |
| H   | -0.29031000 | -1.34244800 | -2.45294500 |
| H   | 0.61733900  | -1.19257800 | -0.95485800 |
| C   | -4.87621400 | 0.54931000  | -3.11240800 |
| H   | -3.69596700 | 1.88962200  | -1.91805900 |
| H   | -4.37921200 | 0.55847400  | -1.01104200 |
| C   | -3.74621800 | -2.33324400 | -0.31764400 |
| H   | -3.32298000 | -0.60694000 | 0.96068700  |



---

|   |             |             |             |
|---|-------------|-------------|-------------|
| H | -2.14014600 | -1.91042300 | 1.10518200  |
| N | -1.70134600 | 2.19056300  | -0.20677100 |
| C | 0.13124000  | 1.02409000  | 0.89669800  |
| C | 0.94714300  | -3.69745100 | -1.10978400 |
| H | -0.89256000 | -3.23839200 | -0.13071000 |
| H | -1.08009000 | -3.53544100 | -1.86587800 |
| C | -6.14534800 | 1.38562900  | -2.99698600 |
| H | -5.13343600 | -0.51790500 | -3.12615600 |
| H | -4.37616100 | 0.75848400  | -4.06675600 |
| C | -4.55193400 | -3.15510200 | 0.68864300  |
| H | -4.43633000 | -1.76713000 | -0.95655600 |
| H | -3.19342700 | -3.01438900 | -0.97673100 |
| C | -1.21684400 | 3.23434400  | -1.09455900 |
| C | -2.87546900 | 2.53133400  | 0.39946100  |
| C | 0.59590500  | 2.32992900  | 1.42688300  |
| C | 0.89504300  | -5.20658500 | -0.90519800 |
| H | 1.51319200  | -3.21938400 | -0.29965700 |
| H | 1.46857600  | -3.45548500 | -2.04508400 |
| H | -6.66828000 | 1.17854600  | -2.05784000 |
| H | -5.91383000 | 2.45534300  | -3.01571100 |
| H | -6.83582100 | 1.17733400  | -3.81860600 |
| C | -5.53629500 | -4.10080800 | 0.00937700  |
| H | -5.08921100 | -2.47313600 | 1.35867500  |
| H | -3.85812200 | -3.72697400 | 1.31760800  |
| C | -2.13577500 | 4.39380800  | -0.68535800 |
| H | -0.16360000 | 3.45504000  | -0.90370300 |
| H | -1.34139700 | 2.94482300  | -2.14635800 |
| O | -3.23461700 | 3.77566100  | 0.00349500  |
| O | -3.53891400 | 1.85380200  | 1.15144500  |
| C | 1.90128500  | 2.75203000  | 1.14355300  |

---

|   |             |             |             |
|---|-------------|-------------|-------------|
| C | -0.22850400 | 3.14606900  | 2.21269900  |
| H | 0.36470000  | -5.70146500 | -1.72589300 |
| H | 0.37281600  | -5.45713900 | 0.02483200  |
| H | 1.89845500  | -5.63813500 | -0.84939700 |
| H | -5.01486200 | -4.80940200 | -0.64241700 |
| H | -6.10464400 | -4.67864200 | 0.74299900  |
| H | -6.25246100 | -3.54656900 | -0.60605400 |
| H | -2.53496000 | 4.95324000  | -1.53151100 |
| H | -1.63476800 | 5.07557900  | 0.00744700  |
| C | 2.35386600  | 3.98657600  | 1.59927500  |
| H | 2.54980300  | 2.11440100  | 0.54841400  |
| C | 0.23865900  | 4.36867300  | 2.68829300  |
| H | -1.22837800 | 2.80431000  | 2.46996600  |
| C | 1.52545800  | 4.79877000  | 2.37124600  |
| H | 3.36191000  | 4.30952400  | 1.35704000  |
| H | -0.40530100 | 4.98594100  | 3.30768900  |
| H | 1.88509000  | 5.75644400  | 2.73483200  |
| B | 1.05706400  | -0.28416200 | 1.24472000  |
| O | 0.22324700  | -1.51224000 | 1.37784300  |
| O | 1.72498100  | -0.12184400 | 2.53502100  |
| H | 1.85826600  | -0.39983200 | 0.30112800  |
| C | 0.31128400  | -1.94278500 | 2.73169300  |
| C | 0.18388600  | -3.46030400 | 2.76562700  |
| H | 0.36936500  | -3.85684600 | 3.77017500  |
| H | -0.83043200 | -3.75922100 | 2.47411800  |
| H | 0.88757500  | -3.92331200 | 2.06841600  |
| C | -0.80634200 | -1.29607400 | 3.55568600  |
| H | -0.80266700 | -1.65117900 | 4.59138300  |
| H | -0.69500200 | -0.20740300 | 3.55825100  |
| H | -1.78237600 | -1.53901200 | 3.12592800  |

---

|   |            |             |             |
|---|------------|-------------|-------------|
| C | 1.70660200 | -1.38757600 | 3.16307700  |
| C | 2.84915700 | -2.25014400 | 2.61252300  |
| H | 3.78764600 | -1.69828500 | 2.72300700  |
| H | 2.94411600 | -3.20237700 | 3.14510300  |
| H | 2.69867900 | -2.45612700 | 1.54773800  |
| C | 1.88269400 | -1.19703300 | 4.66372300  |
| H | 1.17618700 | -0.45932900 | 5.04920800  |
| H | 1.74464800 | -2.13937200 | 5.20587500  |
| H | 2.89366100 | -0.83234000 | 4.87018700  |
| B | 2.41424100 | 0.59503900  | -1.98783500 |
| O | 2.76935300 | -0.64838300 | -2.43033500 |
| O | 3.48009800 | 1.39623300  | -1.68556300 |
| H | 1.28705800 | 0.97390800  | -1.94044000 |
| C | 4.19398300 | -0.78678300 | -2.18730100 |
| C | 4.79751600 | -1.61539000 | -3.30818200 |
| H | 5.88509800 | -1.67486200 | -3.19881400 |
| H | 4.39677300 | -2.63200900 | -3.26535900 |
| H | 4.56545700 | -1.19775800 | -4.28956600 |
| C | 4.35937600 | -1.49907500 | -0.84870300 |
| H | 5.41343600 | -1.70168100 | -0.63676200 |
| H | 3.93598100 | -0.91063900 | -0.03047800 |
| H | 3.82498400 | -2.45300900 | -0.88769500 |
| C | 4.66858700 | 0.70412700  | -2.14273500 |
| C | 4.99454400 | 1.26695300  | -3.52342400 |
| H | 5.11943700 | 2.35000900  | -3.44404300 |
| H | 5.91889600 | 0.84054100  | -3.92309800 |
| H | 4.18296200 | 1.06776500  | -4.22984600 |
| C | 5.80210300 | 0.98563100  | -1.17194600 |
| H | 5.52181500 | 0.73490600  | -0.14743000 |
| H | 6.69395300 | 0.41246700  | -1.44485800 |

---

|     |             |             |             |
|-----|-------------|-------------|-------------|
| H   | 6.05747600  | 2.04842500  | -1.20604500 |
| SM5 |             |             |             |
| P   | -1.71857000 | -0.01843300 | 0.46944200  |
| C   | -2.21802000 | -1.53484300 | 1.35485900  |
| C   | -0.96012000 | 1.12248300  | 1.69000000  |
| C   | -3.13664200 | -2.53412700 | 0.63746700  |
| H   | -1.29512700 | -2.01068900 | 1.70250400  |
| H   | -2.72476800 | -1.15104800 | 2.24954500  |
| C   | -3.22610900 | 0.74967700  | -0.20614700 |
| C   | -0.64362200 | -0.47615000 | -0.93822300 |
| C   | -0.77216500 | 0.58332200  | 3.11004100  |
| H   | 0.02114300  | 1.37252600  | 1.28088900  |
| H   | -1.56671100 | 2.03439300  | 1.67640400  |
| C   | -3.93394400 | -3.36055300 | 1.64752900  |
| H   | -2.53855800 | -3.21408400 | 0.02255900  |
| H   | -3.82676400 | -2.02633300 | -0.04700900 |
| C   | -4.33139100 | 0.93265300  | 0.83689800  |
| H   | -3.55090000 | 0.12495000  | -1.04604200 |
| H   | -2.89851700 | 1.71099200  | -0.61861100 |
| N   | -0.68855800 | -1.86217200 | -1.23688300 |
| C   | 0.16766900  | 0.34895400  | -1.62481900 |
| C   | 0.07459300  | 1.55818300  | 3.92854900  |
| H   | -1.73921300 | 0.42124600  | 3.60391000  |
| H   | -0.23682500 | -0.37086600 | 3.07360800  |
| C   | -4.78555200 | -4.42964400 | 0.97248900  |
| H   | -4.57350800 | -2.69204800 | 2.23823400  |
| H   | -3.23907500 | -3.82863900 | 2.35578300  |
| C   | -5.50557000 | 1.73894300  | 0.28181800  |
| H   | -4.69244700 | -0.04867500 | 1.17157600  |
| H   | -3.93359500 | 1.44038800  | 1.72687600  |

---

|   |             |             |             |
|---|-------------|-------------|-------------|
| C | 0.32640300  | -2.84766100 | -0.86753800 |
| C | -1.60314700 | -2.37275100 | -2.11569600 |
| C | 1.02719300  | -0.22617900 | -2.70266100 |
| C | 0.37764000  | 1.01011400  | 5.31740700  |
| H | -0.43525000 | 2.52850500  | 4.00025200  |
| H | 1.01975800  | 1.70850300  | 3.39526000  |
| H | -5.50307400 | -3.98146700 | 0.27798900  |
| H | -4.16182500 | -5.12297000 | 0.39965400  |
| H | -5.34827800 | -5.01276400 | 1.70634700  |
| C | -6.63073400 | 1.89711800  | 1.29871900  |
| H | -5.88459600 | 1.24460100  | -0.62066400 |
| H | -5.14511700 | 2.72619600  | -0.03240600 |
| C | 0.10671600  | -3.86553900 | -1.98880200 |
| H | 1.32831900  | -2.40981200 | -0.84273400 |
| H | 0.10884200  | -3.26549500 | 0.12374800  |
| O | -1.24833100 | -3.63748900 | -2.43005600 |
| O | -2.59391400 | -1.82220500 | -2.54067700 |
| C | 2.41434100  | -0.26911000 | -2.52593400 |
| C | 0.45986700  | -0.73629600 | -3.87541200 |
| H | 0.93888300  | 0.07474300  | 5.23000700  |
| H | -0.53993700 | 0.80826800  | 5.88117500  |
| H | 0.98114900  | 1.71067100  | 5.90159200  |
| H | -6.27930400 | 2.41413200  | 2.19760700  |
| H | -7.46191100 | 2.47426200  | 0.88497600  |
| H | -7.02244300 | 0.92252400  | 1.60715100  |
| H | 0.18605500  | -4.90217700 | -1.66249100 |
| H | 0.77700300  | -3.68469000 | -2.83486400 |
| C | 3.21836000  | -0.83516700 | -3.51165500 |
| H | 2.84424400  | 0.09364000  | -1.59686200 |
| C | 1.27264400  | -1.28542500 | -4.86392700 |

---

|   |             |             |             |
|---|-------------|-------------|-------------|
| H | -0.61883900 | -0.70033200 | -4.00794000 |
| C | 2.65311900  | -1.33888300 | -4.68152700 |
| H | 4.29227900  | -0.88528400 | -3.35985000 |
| H | 0.82534700  | -1.67606300 | -5.77292200 |
| H | 3.28670500  | -1.77305300 | -5.44896900 |
| B | 0.32779400  | 1.88471000  | -1.34876000 |
| O | -0.62926100 | 2.64383900  | -0.72370400 |
| O | 1.39933800  | 2.60770600  | -1.77733800 |
| H | 1.75044000  | 0.64106700  | 0.52690000  |
| C | -0.22599100 | 4.03303700  | -0.85637100 |
| C | -0.57774600 | 4.76678200  | 0.42575100  |
| H | -0.22580800 | 5.80233900  | 0.38168500  |
| H | -1.66417900 | 4.78544700  | 0.55399600  |
| H | -0.13373600 | 4.28480500  | 1.29933800  |
| C | -1.00716100 | 4.59900600  | -2.03708800 |
| H | -0.79394400 | 5.66095200  | -2.18576000 |
| H | -0.76700900 | 4.06093400  | -2.95875400 |
| H | -2.07781300 | 4.48636900  | -1.84503900 |
| C | 1.30959500  | 3.90532700  | -1.13926700 |
| C | 2.14875300  | 3.82712000  | 0.13252600  |
| H | 3.16643600  | 3.53262800  | -0.13646300 |
| H | 2.18837300  | 4.79266800  | 0.64486800  |
| H | 1.76216300  | 3.07124500  | 0.82372900  |
| C | 1.86856700  | 4.95413300  | -2.08508700 |
| H | 1.38410100  | 4.91319800  | -3.06228700 |
| H | 1.73916600  | 5.95715300  | -1.66624500 |
| H | 2.93814700  | 4.78068100  | -2.22776900 |
| B | 1.84524300  | -0.44800100 | 1.14036800  |
| O | 2.27504500  | -0.30642500 | 2.54291400  |
| O | 2.86895700  | -1.28767000 | 0.48860300  |

---

|      |             |             |             |
|------|-------------|-------------|-------------|
| H    | 0.70521500  | -0.97419300 | 1.11281100  |
| C    | 3.62585000  | -0.72181200 | 2.60815900  |
| C    | 3.93515200  | -1.20488700 | 4.01899700  |
| H    | 4.93267900  | -1.65517800 | 4.07847800  |
| H    | 3.90569900  | -0.36073300 | 4.71591800  |
| H    | 3.19801900  | -1.94012600 | 4.35061700  |
| C    | 4.52856400  | 0.46530300  | 2.25165900  |
| H    | 5.59204100  | 0.23769800  | 2.38106800  |
| H    | 4.35564800  | 0.77428900  | 1.21594200  |
| H    | 4.27453500  | 1.30594600  | 2.90514100  |
| C    | 3.68348600  | -1.83232600 | 1.51072500  |
| C    | 3.05372500  | -3.14012800 | 2.00356800  |
| H    | 2.91286800  | -3.80828200 | 1.14760400  |
| H    | 3.68008700  | -3.65710600 | 2.73843300  |
| H    | 2.07611500  | -2.94039700 | 2.45406700  |
| C    | 5.07281300  | -2.10229800 | 0.94744600  |
| H    | 5.47764300  | -1.20804500 | 0.46825500  |
| H    | 5.76764200  | -2.42890400 | 1.72963200  |
| H    | 5.01811000  | -2.89263900 | 0.19142000  |
| STS6 |             |             |             |
| P    | 0.87474600  | 0.96038200  | -0.73205500 |
| C    | 0.23533500  | 2.19682900  | -1.92182300 |
| C    | 0.86799500  | 1.84152200  | 0.86486700  |
| C    | 0.69670000  | 2.06455000  | -3.37752300 |
| H    | -0.85252300 | 2.09827200  | -1.82568800 |
| H    | 0.49532000  | 3.18608200  | -1.52802600 |
| C    | 2.47088000  | 0.25676000  | -1.28558000 |
| C    | -0.37210200 | -0.39871800 | -0.73026500 |
| C    | 1.89284100  | 2.96712000  | 1.04574900  |
| H    | -0.14515100 | 2.25886400  | 0.90782200  |

---

|   |             |             |             |
|---|-------------|-------------|-------------|
| H | 0.94852300  | 1.10230100  | 1.66265800  |
| C | 2.01894200  | 2.78508400  | -3.64564800 |
| H | -0.07696300 | 2.49432500  | -4.02391300 |
| H | 0.78175200  | 1.00980500  | -3.66321300 |
| C | 3.74180200  | 0.89017100  | -0.72669900 |
| H | 2.44714900  | 0.28218400  | -2.37983500 |
| H | 2.41760500  | -0.79944200 | -1.00749500 |
| N | -1.07494400 | -0.49461900 | -1.98878900 |
| C | -0.17141100 | -1.55965500 | -0.00094000 |
| C | 1.48479500  | 3.87239600  | 2.20988800  |
| H | 2.88570800  | 2.55343500  | 1.24519900  |
| H | 1.98201200  | 3.57384200  | 0.13365800  |
| C | 2.53563400  | 2.53563500  | -5.05806500 |
| H | 2.77465400  | 2.46287600  | -2.91711500 |
| H | 1.87706200  | 3.86041900  | -3.48004500 |
| C | 4.98593100  | 0.28363700  | -1.37492900 |
| H | 3.74947500  | 1.97637600  | -0.88192800 |
| H | 3.76733600  | 0.72265000  | 0.35707800  |
| C | -2.52344700 | -0.40664600 | -2.16081600 |
| C | -0.50755800 | -1.20238300 | -3.02127900 |
| C | -1.10062300 | -2.69879800 | -0.29873300 |
| C | 2.49076800  | 4.99226800  | 2.45223400  |
| H | 1.38028500  | 3.26093300  | 3.11447000  |
| H | 0.49219000  | 4.29268400  | 2.00826500  |
| H | 2.72977900  | 1.47019800  | -5.21905800 |
| H | 1.80213100  | 2.85502800  | -5.80538700 |
| H | 3.46483300  | 3.07985800  | -5.24673800 |
| C | 6.27360000  | 0.79271100  | -0.73627800 |
| H | 4.98044400  | 0.51531800  | -2.44754600 |
| H | 4.93640600  | -0.80972900 | -1.29721900 |



---

|   |             |             |             |
|---|-------------|-------------|-------------|
| C | -2.74511800 | -1.51446100 | -3.18993600 |
| H | -3.04896800 | -0.57221500 | -1.21889800 |
| H | -2.80043700 | 0.57924100  | -2.55368700 |
| O | -1.47487500 | -1.63561500 | -3.85737100 |
| O | 0.67346000  | -1.38704600 | -3.21532900 |
| C | -2.40090400 | -2.74149400 | 0.22278600  |
| C | -0.68578300 | -3.73910200 | -1.14015200 |
| H | 2.59259100  | 5.62823300  | 1.56668000  |
| H | 3.48092200  | 4.58820400  | 2.68676900  |
| H | 2.18423700  | 5.62903100  | 3.28636600  |
| H | 6.31056200  | 0.53567300  | 0.32805100  |
| H | 7.15601000  | 0.36019400  | -1.21512900 |
| H | 6.34879600  | 1.88207900  | -0.81657100 |
| H | -3.50093800 | -1.27601900 | -3.93791200 |
| H | -2.97500100 | -2.47178300 | -2.70950100 |
| C | -3.26053300 | -3.79068500 | -0.09792500 |
| H | -2.74011900 | -1.93828100 | 0.87171800  |
| C | -1.54462800 | -4.78827900 | -1.46105000 |
| H | 0.31695200  | -3.70594600 | -1.55783600 |
| C | -2.83665000 | -4.81694200 | -0.94078700 |
| H | -4.26520200 | -3.80571600 | 0.31466500  |
| H | -1.20425800 | -5.58113800 | -2.12039000 |
| H | -3.50784500 | -5.63362900 | -1.18883700 |
| B | 0.85668600  | -1.77042000 | 1.10916800  |
| O | 1.89647700  | -0.89674500 | 1.42556600  |
| O | 0.90165700  | -2.90571300 | 1.89207800  |
| H | -1.50355200 | -0.05974700 | 1.73214500  |
| C | 2.78820200  | -1.59709300 | 2.31878300  |
| C | 3.39101200  | -0.59951300 | 3.29377500  |
| H | 3.98834600  | -1.11459200 | 4.05305000  |

---

|   |             |             |             |
|---|-------------|-------------|-------------|
| H | 4.05217500  | 0.08959400  | 2.75820400  |
| H | 2.61747500  | -0.01360400 | 3.79471000  |
| C | 3.87921900  | -2.23394200 | 1.46105500  |
| H | 4.62077800  | -2.75308600 | 2.07479600  |
| H | 3.45112700  | -2.94774300 | 0.75013000  |
| H | 4.39293900  | -1.44982500 | 0.89640200  |
| C | 1.83411100  | -2.65340600 | 2.95891500  |
| C | 1.03418100  | -2.08591600 | 4.12992200  |
| H | 0.24654500  | -2.79621500 | 4.39306300  |
| H | 1.66402400  | -1.92272900 | 5.00924300  |
| H | 0.55616300  | -1.13983100 | 3.85588900  |
| C | 2.50344700  | -3.95940900 | 3.35219000  |
| H | 2.94270400  | -4.45816000 | 2.48634000  |
| H | 3.28737800  | -3.78396500 | 4.09617900  |
| H | 1.76171700  | -4.63172100 | 3.79131400  |
| B | -2.21328800 | 0.74946100  | 1.14108000  |
| O | -2.19951100 | 2.12707200  | 1.53029400  |
| O | -3.56857600 | 0.36182000  | 0.91784300  |
| H | -1.43533400 | 0.58994500  | -0.06022600 |
| C | -3.54694400 | 2.51989200  | 1.79139200  |
| C | -3.70824000 | 3.99698100  | 1.46222100  |
| H | -4.75321600 | 4.31074200  | 1.55809300  |
| H | -3.11059500 | 4.59445300  | 2.15730000  |
| H | -3.36675200 | 4.21614200  | 0.44831900  |
| C | -3.82292600 | 2.28031400  | 3.27731700  |
| H | -4.81519800 | 2.63446500  | 3.57379700  |
| H | -3.74213500 | 1.21578500  | 3.51632900  |
| H | -3.07338700 | 2.81888200  | 3.86368800  |
| C | -4.36093500 | 1.55059900  | 0.87861100  |
| C | -4.43064800 | 2.04893400  | -0.56579200 |

---

|          |                    |                   |                    |
|----------|--------------------|-------------------|--------------------|
| <b>H</b> | <b>-4.84402100</b> | <b>1.25715600</b> | <b>-1.19742000</b> |
| <b>H</b> | <b>-5.07156100</b> | <b>2.93076300</b> | <b>-0.66078600</b> |
| <b>H</b> | <b>-3.43075200</b> | <b>2.30133200</b> | <b>-0.93414700</b> |
| <b>C</b> | <b>-5.75969500</b> | <b>1.22521300</b> | <b>1.38221600</b>  |
| <b>H</b> | <b>-5.72324000</b> | <b>0.73312700</b> | <b>2.35582900</b>  |
| <b>H</b> | <b>-6.36761200</b> | <b>2.13245300</b> | <b>1.46650100</b>  |
| <b>H</b> | <b>-6.25548800</b> | <b>0.54836500</b> | <b>0.68006200</b>  |

---

**Part 14: The geometries (Å) for all the optimized compounds and transition states of PBu<sub>3</sub>-catalyzed hydroboration of propiolonitrile at the M06-2X/6-31G(d,p)/SMD<sub>dichloromethane</sub> level**

**Propiolonitrile**

|   |             |             |             |
|---|-------------|-------------|-------------|
| C | 1.04532400  | 0.00005200  | 0.00005300  |
| C | -0.38277200 | 0.00001500  | 0.00001900  |
| C | -1.07998700 | 1.21759300  | 0.00000100  |
| C | -1.07993700 | -1.21757200 | 0.00001100  |
| C | -2.46903500 | 1.20985700  | -0.00001400 |
| H | -0.52837100 | 2.15181000  | 0.00002200  |
| C | -2.46900000 | -1.20988700 | -0.00002000 |
| H | -0.52830800 | -2.15178200 | 0.00002400  |
| C | -3.16235600 | -0.00003500 | -0.00003000 |
| H | -3.01202100 | 2.14916600  | -0.00001600 |
| H | -3.01192800 | -2.14923000 | -0.00003300 |
| H | -4.24783800 | -0.00003800 | -0.00004200 |
| C | 2.25735800  | 0.00001700  | 0.00008500  |
| C | 3.63452500  | 0.00000500  | -0.00000500 |
| N | 4.79482100  | -0.00002900 | -0.00007800 |

**PBu<sub>3</sub>**

|   |             |             |             |
|---|-------------|-------------|-------------|
| P | -0.41166200 | 0.17975800  | -1.21395600 |
| C | 0.82716300  | -1.21147800 | -1.24658400 |
| C | 1.24328900  | -1.84128900 | 0.08125300  |
| H | 1.71067800  | -0.82400100 | -1.77014500 |
| H | 0.40207300  | -1.97666400 | -1.90914800 |
| C | 2.31319500  | -2.91998900 | -0.09731500 |
| H | 1.62884500  | -1.06902300 | 0.75992000  |
| H | 0.36910900  | -2.28293200 | 0.57578200  |

---

|   |             |             |             |
|---|-------------|-------------|-------------|
| C | 2.71866600  | -3.56645300 | 1.22378700  |
| H | 1.93924200  | -3.68728800 | -0.78675600 |
| H | 3.19346900  | -2.47433800 | -0.57807500 |
| H | 3.48906300  | -4.32952800 | 1.07962900  |
| H | 3.11457900  | -2.81973000 | 1.92035100  |
| H | 1.85992100  | -4.04605000 | 1.70536200  |
| C | -1.80615300 | -0.60061700 | -0.26115200 |
| C | -3.01118300 | 0.33190200  | -0.12427800 |
| H | -1.46514000 | -0.92056800 | 0.73159100  |
| H | -2.09966700 | -1.50526200 | -0.80992000 |
| C | -4.18761700 | -0.32537100 | 0.59716400  |
| H | -2.71801900 | 1.23886200  | 0.42144000  |
| H | -3.33509900 | 0.66115100  | -1.12047600 |
| C | -5.38896200 | 0.60594000  | 0.72836500  |
| H | -4.47953800 | -1.23171500 | 0.05173500  |
| H | -3.86242700 | -0.65342000 | 1.59257200  |
| H | -6.22275200 | 0.11628000  | 1.23975700  |
| H | -5.12876200 | 1.50409000  | 1.29831300  |
| H | -5.74335400 | 0.92936400  | -0.25601200 |
| C | 0.30838400  | 1.29423200  | 0.09332000  |
| C | 1.70507900  | 1.80160100  | -0.26865500 |
| H | 0.32723700  | 0.78248300  | 1.06437600  |
| H | -0.37407700 | 2.14719700  | 0.19503900  |
| C | 2.24131500  | 2.82459500  | 0.73264500  |
| H | 2.40396400  | 0.95561800  | -0.32250700 |
| H | 1.68731600  | 2.25119000  | -1.27124000 |
| C | 3.64532100  | 3.30599300  | 0.37998200  |
| H | 1.55549500  | 3.68000900  | 0.77485300  |
| H | 2.24375900  | 2.37859300  | 1.73545600  |
| H | 4.01175500  | 4.04179700  | 1.10165100  |

---

|                   |             |             |             |
|-------------------|-------------|-------------|-------------|
| H                 | 4.35398600  | 2.47105500  | 0.36552000  |
| H                 | 3.66227900  | 3.77206300  | -0.61092000 |
| HBpin             |             |             |             |
| B                 | 0.00000000  | 0.00000000  | 1.93323300  |
| O                 | 0.34765700  | 1.08964900  | 1.18785800  |
| O                 | -0.34765700 | -1.08964900 | 1.18785800  |
| H                 | 0.00000000  | 0.00000000  | 3.12059000  |
| C                 | 0.00000000  | 0.78152300  | -0.18829400 |
| C                 | 1.02470400  | 1.41849100  | -1.10994700 |
| H                 | 0.83405200  | 1.12870100  | -2.14807800 |
| H                 | 0.95150700  | 2.50746200  | -1.04199300 |
| H                 | 2.04154300  | 1.12513400  | -0.84305000 |
| C                 | -1.38382000 | 1.37627000  | -0.43370900 |
| H                 | -1.69658000 | 1.23851200  | -1.47233900 |
| H                 | -2.13169500 | 0.91827100  | 0.22112300  |
| H                 | -1.35122800 | 2.44799400  | -0.22020200 |
| C                 | 0.00000000  | -0.78152300 | -0.18829400 |
| C                 | 1.38382000  | -1.37627000 | -0.43370900 |
| H                 | 1.35122800  | -2.44799400 | -0.22020200 |
| H                 | 1.69658000  | -1.23851200 | -1.47233900 |
| H                 | 2.13169500  | -0.91827100 | 0.22112300  |
| C                 | -1.02470400 | -1.41849100 | -1.10994700 |
| H                 | -2.04154300 | -1.12513400 | -0.84305000 |
| H                 | -0.83405200 | -1.12870100 | -2.14807800 |
| H                 | -0.95150700 | -2.50746200 | -1.04199300 |
| 2H <sub>2</sub> O |             |             |             |
| O                 | 1.34866100  | -0.04938300 | -0.08243600 |
| H                 | 1.69199600  | 0.85372600  | -0.09306500 |
| H                 | 1.68690600  | -0.42906900 | 0.73925700  |
| O                 | -1.49360600 | -0.08199200 | -0.04422800 |

---

|                   |             |             |             |
|-------------------|-------------|-------------|-------------|
| H                 | -1.69694600 | 0.71551800  | 0.45707400  |
| H                 | -0.52240000 | -0.08917500 | -0.08995800 |
| TS1 <sub>CN</sub> |             |             |             |
| C                 | -1.38092200 | 0.89971700  | 1.14492900  |
| C                 | -2.53326100 | 0.03090700  | 0.93233900  |
| C                 | -2.72277700 | -0.73780300 | -0.22036500 |
| C                 | -3.51517000 | 0.01215900  | 1.93696200  |
| C                 | -3.87061500 | -1.51098600 | -0.36697500 |
| H                 | -1.97389200 | -0.72252800 | -1.00564200 |
| C                 | -4.65283500 | -0.77130000 | 1.79036000  |
| H                 | -3.36802300 | 0.61314500  | 2.82840800  |
| C                 | -4.83496400 | -1.53530200 | 0.63788500  |
| H                 | -4.00937200 | -2.09672400 | -1.26997600 |
| H                 | -5.39873000 | -0.78560100 | 2.57866700  |
| H                 | -5.72474800 | -2.14633700 | 0.52439600  |
| C                 | -0.98684000 | 1.89756200  | 1.78857900  |
| P                 | 0.46882800  | 0.06880700  | -0.14385800 |
| C                 | 0.86412400  | -1.24623200 | -1.38833800 |
| C                 | 0.68547300  | -2.65541100 | -0.82166200 |
| H                 | 1.88646900  | -1.10250200 | -1.76087200 |
| H                 | 0.18701000  | -1.09406400 | -2.23802400 |
| C                 | 0.90175400  | -3.74023900 | -1.87627300 |
| H                 | 1.39024600  | -2.81310800 | 0.00562500  |
| H                 | -0.32200800 | -2.75778100 | -0.39497200 |
| C                 | 0.73584900  | -5.14571600 | -1.30673800 |
| H                 | 0.19307200  | -3.58637400 | -2.69955300 |
| H                 | 1.90561000  | -3.62859500 | -2.30478000 |
| H                 | 0.89210300  | -5.90963300 | -2.07360000 |
| H                 | 1.45372500  | -5.32820100 | -0.50031700 |
| H                 | -0.26912000 | -5.28447900 | -0.89470900 |

---

|                  |             |             |             |
|------------------|-------------|-------------|-------------|
| C                | 1.70932900  | -0.18805900 | 1.19698200  |
| C                | 3.17157800  | -0.29854700 | 0.76414800  |
| H                | 1.40403700  | -1.08762100 | 1.74552600  |
| H                | 1.58469400  | 0.65373200  | 1.88940600  |
| C                | 4.11003600  | -0.47972600 | 1.95791100  |
| H                | 3.29728600  | -1.14706100 | 0.07869600  |
| H                | 3.46580700  | 0.60109000  | 0.20914200  |
| C                | 5.57161900  | -0.59353200 | 1.53575700  |
| H                | 3.98589000  | 0.36754600  | 2.64344500  |
| H                | 3.81291200  | -1.37708400 | 2.51498300  |
| H                | 6.22911100  | -0.72297100 | 2.40008500  |
| H                | 5.72154200  | -1.44950600 | 0.86937400  |
| H                | 5.89495700  | 0.30539100  | 1.00059100  |
| C                | 1.02078600  | 1.62139700  | -0.96901800 |
| C                | 0.01698500  | 2.10526700  | -2.01761800 |
| H                | 2.00509400  | 1.45906000  | -1.42390700 |
| H                | 1.14887600  | 2.38010400  | -0.18683600 |
| C                | 0.46288500  | 3.39850600  | -2.69845200 |
| H                | -0.12879200 | 1.32764700  | -2.77971700 |
| H                | -0.95935600 | 2.26310600  | -1.54023500 |
| C                | -0.54039200 | 3.88329700  | -3.74040500 |
| H                | 0.60848100  | 4.17175400  | -1.93399700 |
| H                | 1.44056800  | 3.23858200  | -3.16994700 |
| H                | -0.20718700 | 4.80988300  | -4.21631500 |
| H                | -0.68090900 | 3.13432200  | -4.52690800 |
| H                | -1.51714300 | 4.07333900  | -3.28354800 |
| C                | -0.10444500 | 2.85520300  | 2.21107000  |
| N                | 0.62431200  | 3.68605500  | 2.58955800  |
| M1 <sub>CN</sub> |             |             |             |
| C                | -0.59638200 | -0.68953700 | -1.29778800 |



---

|   |             |             |             |
|---|-------------|-------------|-------------|
| C | -2.01876700 | -0.34448800 | -1.00584800 |
| C | -2.64453600 | -0.73391800 | 0.18491000  |
| C | -2.76047300 | 0.37758700  | -1.94912500 |
| C | -3.96950100 | -0.38656400 | 0.43896500  |
| H | -2.09694500 | -1.33630100 | 0.90601800  |
| C | -4.08398900 | 0.72597100  | -1.69566900 |
| H | -2.28094000 | 0.66766100  | -2.87924700 |
| C | -4.69027700 | 0.35292500  | -0.49671400 |
| H | -4.44133700 | -0.70232200 | 1.36446700  |
| H | -4.64223800 | 1.29353500  | -2.43405100 |
| H | -5.72085900 | 0.62895200  | -0.29687700 |
| C | -0.24046200 | -1.29641000 | -2.44828700 |
| P | 0.65556500  | -0.17886300 | -0.06008700 |
| C | -0.01847600 | 0.77240100  | 1.34141500  |
| C | -0.61741200 | 2.12245200  | 0.93341800  |
| H | 0.81096300  | 0.90808800  | 2.04669400  |
| H | -0.76627100 | 0.15198800  | 1.84315700  |
| C | -1.32018000 | 2.79918800  | 2.10937200  |
| H | 0.17572200  | 2.77709000  | 0.55094400  |
| H | -1.33734800 | 1.98525100  | 0.11737200  |
| C | -1.92049200 | 4.14606600  | 1.72059600  |
| H | -2.11046900 | 2.13364500  | 2.47839700  |
| H | -0.60683000 | 2.92860400  | 2.93276600  |
| H | -2.42282400 | 4.61813800  | 2.56939600  |
| H | -1.14619700 | 4.83307000  | 1.36388500  |
| H | -2.65626400 | 4.02575100  | 0.91866600  |
| C | 1.88104800  | 0.89141200  | -0.88234800 |
| C | 2.92492300  | 1.49024900  | 0.06440400  |
| H | 1.31497300  | 1.67771700  | -1.39505000 |
| H | 2.36466600  | 0.28209000  | -1.65256900 |

---

|                    |             |             |             |
|--------------------|-------------|-------------|-------------|
| C                  | 3.95594500  | 2.32000000  | -0.70127400 |
| H                  | 2.43473600  | 2.12535100  | 0.81268700  |
| H                  | 3.43885500  | 0.68983800  | 0.61120500  |
| C                  | 5.00329600  | 2.93152000  | 0.22356900  |
| H                  | 4.44384200  | 1.68363900  | -1.44904000 |
| H                  | 3.43774700  | 3.11270200  | -1.25452300 |
| H                  | 5.73410100  | 3.51984800  | -0.33799900 |
| H                  | 4.53706800  | 3.59192100  | 0.96207600  |
| H                  | 5.54700700  | 2.15256800  | 0.76799200  |
| C                  | 1.51700600  | -1.63727300 | 0.60541900  |
| C                  | 0.56775200  | -2.65310800 | 1.24549800  |
| H                  | 2.25282400  | -1.27088900 | 1.33076100  |
| H                  | 2.06820200  | -2.08570800 | -0.22909500 |
| C                  | 1.32186000  | -3.86660700 | 1.78814100  |
| H                  | 0.00736000  | -2.17855400 | 2.06201200  |
| H                  | -0.16752000 | -2.98272400 | 0.50078200  |
| C                  | 0.38400600  | -4.88867700 | 2.42224200  |
| H                  | 1.88269400  | -4.33261000 | 0.96920800  |
| H                  | 2.06208100  | -3.53142500 | 2.52488500  |
| H                  | 0.93611200  | -5.75220100 | 2.80315000  |
| H                  | -0.16854100 | -4.44787900 | 3.25852500  |
| H                  | -0.34726000 | -5.25239800 | 1.69332100  |
| C                  | 1.09200300  | -1.64142100 | -2.73775600 |
| N                  | 2.14686500  | -1.99744300 | -3.10535100 |
| TS1' <sub>CN</sub> |             |             |             |
| C                  | -1.39669700 | 1.41208800  | 2.10301100  |
| C                  | -2.51279200 | 1.07150500  | 1.26927500  |
| C                  | -2.54186100 | 1.53411300  | -0.06027100 |
| C                  | -3.53612500 | 0.21987200  | 1.71886200  |
| C                  | -3.55936500 | 1.13332400  | -0.91995500 |

---

|   |             |             |             |
|---|-------------|-------------|-------------|
| H | -1.75978100 | 2.20523500  | -0.40390500 |
| C | -4.53601300 | -0.19192400 | 0.84480600  |
| H | -3.52342500 | -0.12902700 | 2.74649800  |
| C | -4.55251400 | 0.26001300  | -0.47617600 |
| H | -3.57172100 | 1.49678200  | -1.94339000 |
| H | -5.31070800 | -0.86648900 | 1.19670900  |
| H | -5.33945000 | -0.06025100 | -1.15178600 |
| C | -0.14322300 | 1.27508300  | 2.03541100  |
| P | 0.88539400  | 0.06515600  | 0.22735500  |
| C | -0.03900100 | -0.60846200 | -1.22350500 |
| C | -1.10722400 | -1.63292100 | -0.83786900 |
| H | 0.68515800  | -1.04908300 | -1.92164400 |
| H | -0.50296100 | 0.24614400  | -1.72879300 |
| C | -1.93787600 | -2.07740800 | -2.04124100 |
| H | -0.63087000 | -2.51110900 | -0.38159100 |
| H | -1.77720600 | -1.20593800 | -0.07931600 |
| C | -3.00978300 | -3.09223900 | -1.65841300 |
| H | -2.40870600 | -1.19415600 | -2.49169900 |
| H | -1.27427100 | -2.50310100 | -2.80458800 |
| H | -3.60367600 | -3.39509200 | -2.52551400 |
| H | -2.56116900 | -3.99331700 | -1.22708500 |
| H | -3.69205900 | -2.66981800 | -0.91275900 |
| C | 1.69962500  | -1.39551100 | 1.00138200  |
| C | 2.52037800  | -2.29238000 | 0.07350500  |
| H | 0.90644800  | -1.97344100 | 1.49136300  |
| H | 2.33121000  | -0.99486800 | 1.80506200  |
| C | 3.15550000  | -3.46354300 | 0.82410700  |
| H | 1.88059900  | -2.68478200 | -0.72779600 |
| H | 3.30959900  | -1.70489700 | -0.41205400 |
| C | 3.97543500  | -4.36506200 | -0.09365800 |

---

|                  |            |             |             |
|------------------|------------|-------------|-------------|
| H                | 3.79233500 | -3.07214700 | 1.62695900  |
| H                | 2.36509100 | -4.04831600 | 1.31083100  |
| H                | 4.42318500 | -5.19636500 | 0.45814500  |
| H                | 3.35078800 | -4.78758100 | -0.88762800 |
| H                | 4.78597500 | -3.80433800 | -0.57073800 |
| C                | 2.26897100 | 1.02973000  | -0.51309500 |
| C                | 1.79397200 | 2.35647200  | -1.11012700 |
| H                | 2.77354700 | 0.42163300  | -1.27405100 |
| H                | 2.99073400 | 1.21439100  | 0.29282800  |
| C                | 2.94272200 | 3.17108300  | -1.70339300 |
| H                | 1.04560400 | 2.16628600  | -1.89113300 |
| H                | 1.29259400 | 2.94782400  | -0.33222200 |
| C                | 2.47087400 | 4.49723900  | -2.29137100 |
| H                | 3.69006100 | 3.35541000  | -0.92182600 |
| H                | 3.44216600 | 2.57693400  | -2.47874100 |
| H                | 3.30432500 | 5.06814600  | -2.71018300 |
| H                | 1.74117300 | 4.33356400  | -3.09130900 |
| H                | 1.99200200 | 5.11586100  | -1.52536600 |
| C                | 1.05026000 | 1.61460400  | 2.69254100  |
| N                | 2.07727400 | 1.85493000  | 3.17906100  |
| M2 <sub>CN</sub> |            |             |             |
| C                | 0.74761600 | 0.44913300  | -1.10856800 |
| C                | 1.99366100 | -0.18111300 | -0.58604700 |
| C                | 2.50957700 | 0.14120300  | 0.67579900  |
| C                | 2.67878100 | -1.11739900 | -1.37237800 |
| C                | 3.67204200 | -0.46547400 | 1.14537500  |
| H                | 2.00847700 | 0.89014500  | 1.28413600  |
| C                | 3.84111800 | -1.72281000 | -0.90342700 |
| H                | 2.28558200 | -1.37487900 | -2.35177100 |
| C                | 4.33813500 | -1.40355500 | 0.35921500  |

---

|   |             |             |             |
|---|-------------|-------------|-------------|
| H | 4.06123000  | -0.19890500 | 2.12327000  |
| H | 4.35645000  | -2.44978100 | -1.52360400 |
| H | 5.24211900  | -1.87929200 | 0.72612000  |
| C | 0.52985800  | 1.09167300  | -2.27704900 |
| P | -0.77886400 | 0.35382200  | -0.13220400 |
| C | -0.62168600 | -0.67071400 | 1.36384600  |
| C | -0.33641100 | -2.14620600 | 1.06368100  |
| H | -1.55788400 | -0.55864500 | 1.92397300  |
| H | 0.17220600  | -0.23905200 | 1.98120700  |
| C | 0.01347600  | -2.91930100 | 2.33424700  |
| H | -1.21340000 | -2.59949800 | 0.58453700  |
| H | 0.49428200  | -2.23377400 | 0.35212000  |
| C | 0.28468400  | -4.39348300 | 2.05355600  |
| H | 0.89782900  | -2.45999000 | 2.79325100  |
| H | -0.80529500 | -2.81858500 | 3.05747800  |
| H | 0.53982400  | -4.93313300 | 2.96972100  |
| H | -0.59277300 | -4.87705800 | 1.61193600  |
| H | 1.11799000  | -4.50818200 | 1.35261200  |
| C | -2.07407700 | -0.38648700 | -1.17260900 |
| C | -3.43966000 | -0.52072000 | -0.49666200 |
| H | -1.69039100 | -1.36458500 | -1.48677200 |
| H | -2.12513800 | 0.23946300  | -2.06928500 |
| C | -4.45581700 | -1.18760200 | -1.42427400 |
| H | -3.35052800 | -1.11221700 | 0.42389800  |
| H | -3.81129700 | 0.46915000  | -0.20508400 |
| C | -5.82868600 | -1.32261200 | -0.77381400 |
| H | -4.53587600 | -0.60158000 | -2.34764200 |
| H | -4.08075000 | -2.17692200 | -1.71330400 |
| H | -6.54283800 | -1.80198000 | -1.44893800 |
| H | -5.77285900 | -1.92542500 | 0.13856300  |

---

|   |             |             |             |
|---|-------------|-------------|-------------|
| H | -6.23114500 | -0.34146600 | -0.50162000 |
| C | -1.31866700 | 2.01396700  | 0.37389300  |
| C | -0.27982300 | 2.75223700  | 1.22084700  |
| H | -2.26350200 | 1.90007900  | 0.91787500  |
| H | -1.52416100 | 2.56007800  | -0.55383400 |
| C | -0.76377400 | 4.14581800  | 1.62011900  |
| H | -0.05393800 | 2.17277100  | 2.12567700  |
| H | 0.65513400  | 2.83972800  | 0.65324900  |
| C | 0.26744800  | 4.89424800  | 2.45832200  |
| H | -0.99214200 | 4.71715300  | 0.71245700  |
| H | -1.70363500 | 4.05469800  | 2.17832400  |
| H | -0.09099600 | 5.88972200  | 2.73433200  |
| H | 0.49144100  | 4.35026800  | 3.38185400  |
| H | 1.20510900  | 5.01578200  | 1.90657800  |
| C | 1.61563100  | 1.25319500  | -3.17142600 |
| N | 2.40761200  | 1.46065600  | -4.00630400 |

M3<sub>CN</sub>

|   |             |             |             |
|---|-------------|-------------|-------------|
| C | -0.35816900 | -1.06754800 | 0.10116700  |
| C | -1.51559500 | -1.86538300 | -0.40419200 |
| C | -2.43445600 | -2.44750600 | 0.47536700  |
| C | -1.70007300 | -2.00461100 | -1.78416900 |
| C | -3.54220100 | -3.12971000 | -0.02114300 |
| H | -2.27671800 | -2.36467500 | 1.54751800  |
| C | -2.80757000 | -2.68991800 | -2.27803400 |
| H | -0.97655300 | -1.56402500 | -2.46525500 |
| C | -3.73601500 | -3.24244300 | -1.39760300 |
| H | -4.25249100 | -3.57681700 | 0.66727000  |
| H | -2.94583700 | -2.79018500 | -3.34993000 |
| H | -4.60269000 | -3.77057800 | -1.78238900 |
| C | 0.90519300  | -1.53903000 | 0.18972700  |

---

|   |             |             |             |
|---|-------------|-------------|-------------|
| P | -0.75593300 | 0.66251300  | 0.52849500  |
| C | -2.52180000 | 0.75973700  | 0.98450500  |
| C | -3.52906500 | 0.73813300  | -0.17084700 |
| H | -2.61997600 | 1.69244500  | 1.55416600  |
| H | -2.71598100 | -0.05947900 | 1.68495300  |
| C | -4.96250100 | 0.65098200  | 0.35201300  |
| H | -3.41268100 | 1.64396800  | -0.77882100 |
| H | -3.34359200 | -0.11388700 | -0.83275500 |
| C | -5.98095500 | 0.61197700  | -0.78226600 |
| H | -5.05806700 | -0.25347200 | 0.96611400  |
| H | -5.16472400 | 1.50331000  | 1.01242100  |
| H | -7.00260500 | 0.54223500  | -0.39897900 |
| H | -5.91488400 | 1.51257300  | -1.40140900 |
| H | -5.80424800 | -0.25332100 | -1.42997300 |
| C | -0.48407500 | 1.76416500  | -0.89073100 |
| C | -0.86958900 | 3.22206600  | -0.61762400 |
| H | -1.05760200 | 1.34741800  | -1.72816300 |
| H | 0.58123500  | 1.67323500  | -1.11800600 |
| C | -0.72627200 | 4.07312100  | -1.87964800 |
| H | -1.90226900 | 3.29004900  | -0.25238100 |
| H | -0.22435700 | 3.62913900  | 0.16990500  |
| C | -1.06162800 | 5.53901300  | -1.62540900 |
| H | 0.29965900  | 3.98440100  | -2.25714900 |
| H | -1.38339500 | 3.66894300  | -2.65936400 |
| H | -0.96193600 | 6.13300800  | -2.53792700 |
| H | -2.08933900 | 5.64871000  | -1.26395100 |
| H | -0.39433800 | 5.96787100  | -0.87093000 |
| C | 0.16092200  | 1.26208700  | 1.97686500  |
| C | -0.02719600 | 0.38184600  | 3.21551800  |
| H | -0.21879700 | 2.27486800  | 2.15992200  |

---

|   |             |             |             |
|---|-------------|-------------|-------------|
| H | 1.21205800  | 1.34234900  | 1.68814100  |
| C | 0.84984900  | 0.86308000  | 4.37032100  |
| H | -1.07999200 | 0.39005700  | 3.52523900  |
| H | 0.23267200  | -0.65595500 | 2.97472800  |
| C | 0.67876700  | 0.00351800  | 5.61833500  |
| H | 1.89720000  | 0.84483300  | 4.04509600  |
| H | 0.60779700  | 1.90849400  | 4.59863700  |
| H | 1.31673100  | 0.35503000  | 6.43389300  |
| H | -0.35789100 | 0.02332800  | 5.97060700  |
| H | 0.94210800  | -1.03869800 | 5.41136600  |
| C | 1.07237600  | -2.92887900 | -0.16020800 |
| N | 1.25543000  | -4.04279100 | -0.42664400 |
| B | 2.31689500  | -0.73383500 | 0.58705400  |
| O | 3.44411100  | -1.49907700 | 0.04898900  |
| O | 2.35381500  | 0.57631200  | -0.10070500 |
| H | 2.33916700  | -0.59639700 | 1.81273600  |
| C | 4.28129400  | -0.59373500 | -0.65053200 |
| C | 5.04775200  | -1.35367800 | -1.72540500 |
| H | 5.60605900  | -0.66875900 | -2.37302900 |
| H | 5.76421200  | -2.03425600 | -1.25471100 |
| H | 4.37147900  | -1.95087200 | -2.34107800 |
| C | 5.26486400  | 0.04510600  | 0.33558300  |
| H | 6.00143500  | 0.67890300  | -0.16894800 |
| H | 4.73119000  | 0.64901200  | 1.07587300  |
| H | 5.79883100  | -0.75121300 | 0.86257300  |
| C | 3.25697700  | 0.44890100  | -1.19542200 |
| C | 2.51567800  | -0.09677300 | -2.42177500 |
| H | 1.65495300  | 0.54075800  | -2.64844700 |
| H | 3.16140400  | -0.11623400 | -3.30556300 |
| H | 2.15393800  | -1.11341600 | -2.23770600 |



---

|                   |             |             |             |
|-------------------|-------------|-------------|-------------|
| C                 | 3.84321200  | 1.81820900  | -1.51107200 |
| H                 | 4.24578200  | 2.28869400  | -0.61130800 |
| H                 | 4.64210400  | 1.74167700  | -2.25659300 |
| H                 | 3.06569800  | 2.47371800  | -1.91876900 |
| M3 <sub>CN'</sub> |             |             |             |
| C                 | 0.12359600  | 0.15316200  | -0.42169900 |
| C                 | 0.00535800  | 1.62312900  | -0.19910600 |
| C                 | -0.07782300 | 2.15186400  | 1.09277000  |
| C                 | 0.01401000  | 2.49269800  | -1.29431700 |
| C                 | -0.14057900 | 3.52918800  | 1.28794600  |
| H                 | -0.10410000 | 1.47645600  | 1.94571400  |
| C                 | -0.04376400 | 3.86977100  | -1.09779800 |
| H                 | 0.07397400  | 2.08269900  | -2.29800700 |
| C                 | -0.11452500 | 4.39129600  | 0.19295900  |
| H                 | -0.21143700 | 3.92821300  | 2.29498600  |
| H                 | -0.03220300 | 4.53615800  | -1.95464500 |
| H                 | -0.15670900 | 5.46516100  | 0.34506100  |
| C                 | -0.84060700 | -0.54267800 | -1.06471000 |
| P                 | 1.66268100  | -0.64129500 | 0.16894300  |
| C                 | 2.74643800  | 0.55278100  | 1.00931300  |
| C                 | 3.36969500  | 1.60943700  | 0.09191100  |
| H                 | 3.52425000  | -0.05216200 | 1.49169800  |
| H                 | 2.16513100  | 1.02186000  | 1.80882900  |
| C                 | 4.13329100  | 2.65940700  | 0.89807800  |
| H                 | 4.04804600  | 1.12475200  | -0.62121200 |
| H                 | 2.59081400  | 2.10820100  | -0.49546400 |
| C                 | 4.72923800  | 3.74105400  | 0.00346500  |
| H                 | 3.44749600  | 3.11551100  | 1.62263700  |
| H                 | 4.92534200  | 2.16930300  | 1.47754000  |
| H                 | 5.27297400  | 4.48720800  | 0.58922400  |

---

|   |             |             |             |
|---|-------------|-------------|-------------|
| H | 5.42609300  | 3.31104000  | -0.72330200 |
| H | 3.94122200  | 4.25892800  | -0.55331700 |
| C | 2.58080500  | -1.32048400 | -1.24679500 |
| C | 3.92648500  | -1.93870800 | -0.85464900 |
| H | 2.71274400  | -0.49229600 | -1.95326000 |
| H | 1.93619300  | -2.06361700 | -1.72660900 |
| C | 4.65529500  | -2.49530300 | -2.07785400 |
| H | 4.55920700  | -1.18587300 | -0.36815600 |
| H | 3.76889900  | -2.74512400 | -0.12814100 |
| C | 5.99985100  | -3.11438000 | -1.71049000 |
| H | 4.01897700  | -3.24423800 | -2.56379600 |
| H | 4.80178700  | -1.68777600 | -2.80526100 |
| H | 6.50878100  | -3.50925000 | -2.59388400 |
| H | 6.65915300  | -2.37369100 | -1.24631300 |
| H | 5.87076700  | -3.93832000 | -1.00122200 |
| C | 1.27275900  | -1.95919500 | 1.36173100  |
| C | 0.35754200  | -1.47207500 | 2.48934800  |
| H | 2.23163400  | -2.31953300 | 1.75182600  |
| H | 0.81004600  | -2.78054200 | 0.80527000  |
| C | -0.04634900 | -2.61035500 | 3.42491800  |
| H | 0.86012000  | -0.68313900 | 3.06405000  |
| H | -0.54699500 | -1.02690000 | 2.05642300  |
| C | -0.99490400 | -2.13263100 | 4.51951200  |
| H | -0.52731600 | -3.39968500 | 2.83482200  |
| H | 0.85248500  | -3.05285700 | 3.87113000  |
| H | -1.28589300 | -2.95363300 | 5.18030000  |
| H | -0.52728400 | -1.35602500 | 5.13356900  |
| H | -1.90741900 | -1.71090200 | 4.08457700  |
| C | -0.67107400 | -1.95309800 | -1.28225800 |
| N | -0.57421400 | -3.09440000 | -1.47472100 |

---

|                    |             |             |             |
|--------------------|-------------|-------------|-------------|
| B                  | -2.30988200 | 0.08101600  | -1.63454400 |
| O                  | -3.24427900 | -1.05176800 | -1.72189800 |
| O                  | -2.89787100 | 1.02135100  | -0.68256800 |
| H                  | -2.05630100 | 0.61673300  | -2.71586300 |
| C                  | -4.43380600 | -0.67994200 | -1.04569100 |
| C                  | -5.09935000 | -1.92790500 | -0.47849000 |
| H                  | -5.95960200 | -1.66762500 | 0.14824600  |
| H                  | -5.45646900 | -2.56127700 | -1.29691500 |
| H                  | -4.39429100 | -2.51340500 | 0.11628700  |
| C                  | -5.37613700 | 0.00260400  | -2.04265700 |
| H                  | -6.35281700 | 0.22897700  | -1.60230700 |
| H                  | -4.93333900 | 0.93288400  | -2.41142600 |
| H                  | -5.52935600 | -0.66640300 | -2.89483000 |
| C                  | -3.90833000 | 0.32362700  | 0.02696400  |
| C                  | -3.28115200 | -0.40782500 | 1.22192600  |
| H                  | -2.68907700 | 0.31055100  | 1.79947700  |
| H                  | -4.03888700 | -0.84331700 | 1.88223200  |
| H                  | -2.61796400 | -1.21073200 | 0.88234700  |
| C                  | -4.94059000 | 1.32619800  | 0.52691300  |
| H                  | -5.29647100 | 1.96026100  | -0.28815700 |
| H                  | -5.79942700 | 0.81858500  | 0.97979900  |
| H                  | -4.48913200 | 1.97347700  | 1.28595700  |
| TS2S <sub>CN</sub> |             |             |             |
| C                  | -0.70748700 | -1.05764100 | -0.16149300 |
| C                  | -1.99698600 | -1.71450700 | -0.52768500 |
| C                  | -2.89490400 | -2.18280300 | 0.44225600  |
| C                  | -2.34038200 | -1.87350900 | -1.87823700 |
| C                  | -4.11793800 | -2.74031000 | 0.07599000  |
| H                  | -2.62311900 | -2.11559900 | 1.49235600  |
| C                  | -3.55575500 | -2.44389500 | -2.24826300 |

---

|   |             |             |             |
|---|-------------|-------------|-------------|
| H | -1.64448800 | -1.53050400 | -2.64082400 |
| C | -4.45610300 | -2.86559600 | -1.27087700 |
| H | -4.80206900 | -3.09023700 | 0.84346400  |
| H | -3.80410100 | -2.55147200 | -3.29996000 |
| H | -5.40791900 | -3.30242900 | -1.55667300 |
| C | 0.52463900  | -1.62011200 | -0.53950000 |
| P | -0.76742000 | 0.58809300  | 0.46312100  |
| C | -2.37753800 | 0.90039400  | 1.27116500  |
| C | -3.55778100 | 1.12391700  | 0.31783900  |
| H | -2.22982900 | 1.78423700  | 1.90276000  |
| H | -2.57070900 | 0.05989200  | 1.94446200  |
| C | -4.89207700 | 1.07380500  | 1.06050000  |
| H | -3.44683600 | 2.09704100  | -0.17720900 |
| H | -3.56704600 | 0.36587500  | -0.47360000 |
| C | -6.07836900 | 1.25450300  | 0.11956300  |
| H | -4.97274300 | 0.10645900  | 1.57272500  |
| H | -4.90609200 | 1.84481700  | 1.84096900  |
| H | -7.02753800 | 1.22095700  | 0.66155600  |
| H | -6.02377000 | 2.21469700  | -0.40392000 |
| H | -6.09352400 | 0.46159300  | -0.63588400 |
| C | -0.61625700 | 1.87352000  | -0.82845700 |
| C | -0.61036100 | 3.30903500  | -0.29734000 |
| H | -1.45336200 | 1.70982000  | -1.51867800 |
| H | 0.30941200  | 1.65376300  | -1.36827700 |
| C | -0.55618700 | 4.32990500  | -1.43406400 |
| H | -1.50485800 | 3.49451100  | 0.31214500  |
| H | 0.25695200  | 3.45507500  | 0.35897800  |
| C | -0.52799100 | 5.76636700  | -0.92190200 |
| H | 0.33242000  | 4.13445700  | -2.04702100 |
| H | -1.42484300 | 4.18377500  | -2.08786100 |

---

|   |             |             |             |
|---|-------------|-------------|-------------|
| H | -0.49005100 | 6.48317900  | -1.74683300 |
| H | -1.41984500 | 5.98756200  | -0.32636800 |
| H | 0.34758900  | 5.93857700  | -0.28741000 |
| C | 0.50998800  | 0.91907900  | 1.72620300  |
| C | 0.73381400  | -0.23271700 | 2.70759300  |
| H | 0.17967800  | 1.82192600  | 2.25440700  |
| H | 1.43381700  | 1.15738800  | 1.19085000  |
| C | 1.69514500  | 0.16697900  | 3.82692200  |
| H | -0.22007500 | -0.55690400 | 3.14432100  |
| H | 1.13781400  | -1.09641500 | 2.16548500  |
| C | 2.04488200  | -1.00927200 | 4.73247300  |
| H | 2.61183900  | 0.57820500  | 3.38423400  |
| H | 1.24642500  | 0.97590100  | 4.41659600  |
| H | 2.71628100  | -0.70618200 | 5.54070800  |
| H | 1.14438300  | -1.43649300 | 5.18593800  |
| H | 2.53971300  | -1.80320300 | 4.16327800  |
| C | 0.54399800  | -3.06534500 | -0.64325900 |
| N | 0.56524100  | -4.22363300 | -0.66858500 |
| B | 1.90656900  | -0.98870200 | -0.88901300 |
| O | 2.15514500  | 0.39763400  | -0.81117700 |
| O | 3.11408700  | -1.71592200 | -0.87548300 |
| H | 1.08737000  | -1.35866000 | -1.96686400 |
| C | 3.55691900  | 0.56945500  | -1.09180600 |
| C | 4.04515700  | 1.81532000  | -0.37144500 |
| H | 5.12661000  | 1.93318900  | -0.49351400 |
| H | 3.55634700  | 2.69870700  | -0.79438200 |
| H | 3.81642800  | 1.77483000  | 0.69628200  |
| C | 3.71722100  | 0.72667800  | -2.60237700 |
| H | 4.75648600  | 0.92789800  | -2.87717300 |
| H | 3.38484600  | -0.17528000 | -3.12586000 |

---

|                    |             |             |             |
|--------------------|-------------|-------------|-------------|
| H                  | 3.10223200  | 1.56677900  | -2.93830900 |
| C                  | 4.15294300  | -0.77400100 | -0.56558600 |
| C                  | 4.32684500  | -0.76938000 | 0.95328600  |
| H                  | 4.52454600  | -1.79118300 | 1.28884200  |
| H                  | 5.15835400  | -0.13196200 | 1.26843000  |
| H                  | 3.41031400  | -0.41960700 | 1.44244800  |
| C                  | 5.43890100  | -1.20733300 | -1.24960900 |
| H                  | 5.28329400  | -1.36584200 | -2.31864500 |
| H                  | 6.22177900  | -0.45408600 | -1.11364700 |
| H                  | 5.78977000  | -2.14641400 | -0.81204700 |
| TS2R <sub>CN</sub> |             |             |             |
| C                  | -0.94713100 | -0.67849500 | -0.36287300 |
| C                  | -2.29842000 | -1.31606300 | -0.29076700 |
| C                  | -2.80824800 | -1.82667600 | 0.91125100  |
| C                  | -3.10429500 | -1.41588500 | -1.43658000 |
| C                  | -4.07722600 | -2.40103000 | 0.97364500  |
| H                  | -2.19417600 | -1.78105400 | 1.80638700  |
| C                  | -4.36656700 | -2.00153700 | -1.38252800 |
| H                  | -2.73400200 | -1.01767700 | -2.37758300 |
| C                  | -4.86120200 | -2.49141600 | -0.17413600 |
| H                  | -4.44746500 | -2.78683800 | 1.91880700  |
| H                  | -4.96836600 | -2.06540300 | -2.28423100 |
| H                  | -5.84828700 | -2.94097400 | -0.12924700 |
| C                  | 0.12246900  | -1.26232100 | -1.06196500 |
| P                  | -0.68571200 | 0.84280900  | 0.49285200  |
| C                  | -2.31855500 | 1.52769200  | 0.92099100  |
| C                  | -3.19338900 | 1.84609300  | -0.30332400 |
| H                  | -2.14168300 | 2.41763400  | 1.53308400  |
| H                  | -2.80253700 | 0.78813100  | 1.56876400  |
| C                  | -4.67132500 | 1.56429500  | -0.03789500 |

---

|   |             |             |             |
|---|-------------|-------------|-------------|
| H | -3.05365600 | 2.89629000  | -0.58585000 |
| H | -2.87995100 | 1.24897400  | -1.16782500 |
| C | -5.53619600 | 1.82058300  | -1.26646200 |
| H | -4.77213300 | 0.51534700  | 0.27181300  |
| H | -5.01570500 | 2.17692400  | 0.80463900  |
| H | -6.59022200 | 1.61056300  | -1.06442100 |
| H | -5.45755300 | 2.86207100  | -1.59581100 |
| H | -5.22010700 | 1.18186100  | -2.09854000 |
| C | 0.13637900  | 2.04280400  | -0.60320500 |
| C | 0.48641900  | 3.37555900  | 0.06114500  |
| H | -0.53631900 | 2.18958100  | -1.45621700 |
| H | 1.03723600  | 1.54628500  | -0.97708000 |
| C | 1.11537200  | 4.34892900  | -0.93618500 |
| H | -0.41428000 | 3.83090200  | 0.49397800  |
| H | 1.18512800  | 3.20694900  | 0.89045300  |
| C | 1.50443000  | 5.67248800  | -0.28594700 |
| H | 1.99979500  | 3.87883600  | -1.38459200 |
| H | 0.40897600  | 4.52814000  | -1.75579000 |
| H | 1.94814400  | 6.35837700  | -1.01281800 |
| H | 0.63012300  | 6.16621300  | 0.15091000  |
| H | 2.23367000  | 5.51509900  | 0.51554800  |
| C | 0.27121700  | 0.80302900  | 2.05870900  |
| C | 0.16614800  | -0.52573000 | 2.80592100  |
| H | -0.08566900 | 1.63646300  | 2.67536200  |
| H | 1.31277100  | 0.99140900  | 1.78869300  |
| C | 1.11587200  | -0.57807700 | 4.00138700  |
| H | -0.86352600 | -0.68166200 | 3.15247600  |
| H | 0.40170800  | -1.34762600 | 2.11654200  |
| C | 1.01379900  | -1.89535700 | 4.76343900  |
| H | 2.14216900  | -0.43477700 | 3.64063900  |

---

|                     |             |             |             |
|---------------------|-------------|-------------|-------------|
| H                   | 0.90001500  | 0.26094400  | 4.67471200  |
| H                   | 1.70605100  | -1.92241200 | 5.60963100  |
| H                   | 0.00159100  | -2.04527600 | 5.15329100  |
| H                   | 1.24797000  | -2.74209200 | 4.11004100  |
| C                   | -0.20039900 | -2.17925400 | -2.13552600 |
| N                   | -0.45982600 | -2.86285500 | -3.03459300 |
| B                   | 1.66108900  | -1.16508500 | -0.82857900 |
| O                   | 2.60540500  | -1.47553500 | -1.82565000 |
| O                   | 2.24590300  | -0.36694200 | 0.18055700  |
| H                   | 1.03212200  | -2.28752400 | -0.28867700 |
| C                   | 3.88605100  | -1.32565800 | -1.19273500 |
| C                   | 4.92776300  | -1.02437200 | -2.25781700 |
| H                   | 5.89506200  | -0.79645000 | -1.79852300 |
| H                   | 5.05453600  | -1.89857600 | -2.90289700 |
| H                   | 4.62565700  | -0.18076600 | -2.88160100 |
| C                   | 4.22266600  | -2.63591400 | -0.48034700 |
| H                   | 5.22242200  | -2.60917400 | -0.03759400 |
| H                   | 3.49660300  | -2.85297400 | 0.30968700  |
| H                   | 4.18749500  | -3.45009300 | -1.20951400 |
| C                   | 3.62147100  | -0.15572500 | -0.18894300 |
| C                   | 3.72118300  | 1.21555400  | -0.85568400 |
| H                   | 3.31494400  | 1.97088200  | -0.17399100 |
| H                   | 4.75912300  | 1.47913600  | -1.07964900 |
| H                   | 3.14638000  | 1.23959000  | -1.78704200 |
| C                   | 4.47850900  | -0.19067000 | 1.06697100  |
| H                   | 4.30138300  | -1.10161400 | 1.64236100  |
| H                   | 5.54170900  | -0.13721700 | 0.81059900  |
| H                   | 4.24063100  | 0.66959000  | 1.70084900  |
| TS2S <sub>CN'</sub> |             |             |             |
| C                   | 0.21146600  | 0.03628700  | -0.24662100 |



---

|   |             |             |             |
|---|-------------|-------------|-------------|
| C | -0.19310400 | 1.44353200  | 0.01482000  |
| C | -0.11507700 | 2.03158400  | 1.28516300  |
| C | -0.70789500 | 2.21911300  | -1.03576400 |
| C | -0.50009300 | 3.35502700  | 1.49141700  |
| H | 0.22011400  | 1.43380700  | 2.12896400  |
| C | -1.11316800 | 3.53395100  | -0.82942500 |
| H | -0.78028200 | 1.77458900  | -2.02499300 |
| C | -0.99933300 | 4.11268600  | 0.43452600  |
| H | -0.42831400 | 3.78712600  | 2.48523800  |
| H | -1.50816800 | 4.11272200  | -1.65930500 |
| H | -1.30455700 | 5.14203000  | 0.59501400  |
| C | -0.76245400 | -0.87808100 | -0.67837000 |
| P | 1.84289200  | -0.51941200 | 0.14594100  |
| C | 2.85366700  | 0.79990100  | 0.89060700  |
| C | 3.17312600  | 1.95465000  | -0.06499200 |
| H | 3.77564300  | 0.31341500  | 1.23058000  |
| H | 2.33972600  | 1.16389600  | 1.78351900  |
| C | 3.88426600  | 3.09641000  | 0.65952800  |
| H | 3.80364000  | 1.58964100  | -0.88562500 |
| H | 2.25093800  | 2.33700700  | -0.51811500 |
| C | 4.21987900  | 4.25074700  | -0.27889200 |
| H | 3.23955500  | 3.45463000  | 1.47181200  |
| H | 4.79969900  | 2.71488600  | 1.12880000  |
| H | 4.72402100  | 5.06283100  | 0.25223300  |
| H | 4.87783700  | 3.91975100  | -1.08906600 |
| H | 3.31049800  | 4.65866300  | -0.73220400 |
| C | 2.77846000  | -1.07844100 | -1.32395000 |
| C | 4.24140100  | -1.44305500 | -1.05403000 |
| H | 2.70353700  | -0.26827100 | -2.05879600 |
| H | 2.24233300  | -1.93787300 | -1.73826400 |

---

|   |             |             |             |
|---|-------------|-------------|-------------|
| C | 4.93140800  | -1.94955600 | -2.32113300 |
| H | 4.78509100  | -0.56879700 | -0.67468300 |
| H | 4.29949700  | -2.21663600 | -0.27815100 |
| C | 6.39339500  | -2.30960700 | -2.07727700 |
| H | 4.38949300  | -2.82477900 | -2.69890400 |
| H | 4.86165100  | -1.17903000 | -3.09866200 |
| H | 6.87209500  | -2.67026100 | -2.99185100 |
| H | 6.95771900  | -1.44042100 | -1.72377900 |
| H | 6.48204500  | -3.09560400 | -1.32017000 |
| C | 1.78015900  | -1.91406600 | 1.32014600  |
| C | 0.95414200  | -1.57138600 | 2.56269200  |
| H | 2.80710100  | -2.19316400 | 1.58198200  |
| H | 1.33771800  | -2.76272600 | 0.78343700  |
| C | 0.81635200  | -2.76488700 | 3.50658500  |
| H | 1.42047800  | -0.73378000 | 3.09821800  |
| H | -0.04453100 | -1.23475600 | 2.25209200  |
| C | -0.01854900 | -2.42912000 | 4.73807300  |
| H | 0.35562300  | -3.59713100 | 2.96059900  |
| H | 1.81419700  | -3.10325300 | 3.81187900  |
| H | -0.11331500 | -3.29204600 | 5.40300500  |
| H | 0.43615400  | -1.61323600 | 5.30956200  |
| H | -1.02663500 | -2.11374500 | 4.45005800  |
| C | -0.38194000 | -2.09335200 | -1.35810500 |
| N | -0.07156300 | -3.04940800 | -1.93718800 |
| B | -2.31235500 | -0.77939100 | -0.45863700 |
| O | -2.92073600 | 0.32883900  | 0.14799600  |
| O | -3.24085100 | -1.51744400 | -1.22495000 |
| H | -1.61542800 | -1.61495800 | 0.43324100  |
| C | -4.33545400 | 0.09704100  | 0.06550100  |
| C | -5.04496500 | 1.44109800  | 0.02469600  |

---

|   |             |             |             |
|---|-------------|-------------|-------------|
| H | -6.11721500 | 1.30962800  | -0.15384500 |
| H | -4.91828900 | 1.95204400  | 0.98380800  |
| H | -4.63077900 | 2.08081600  | -0.75740400 |
| C | -4.75773800 | -0.69102700 | 1.30529400  |
| H | -5.84120100 | -0.83739900 | 1.34258000  |
| H | -4.27113600 | -1.67138700 | 1.32915800  |
| H | -4.45239000 | -0.13478300 | 2.19612100  |
| C | -4.45315800 | -0.74698400 | -1.24318100 |
| C | -4.42514500 | 0.12760100  | -2.49682200 |
| H | -4.28270300 | -0.51383000 | -3.37097000 |
| H | -5.35803000 | 0.68506800  | -2.62397300 |
| H | -3.59485900 | 0.83982700  | -2.45250800 |
| C | -5.64281600 | -1.69278000 | -1.28486000 |
| H | -5.59358300 | -2.42654700 | -0.47774300 |
| H | -6.58234600 | -1.13680600 | -1.19988900 |
| H | -5.65159500 | -2.23203900 | -2.23674700 |

TS2R<sub>CN'</sub>

|   |             |             |             |
|---|-------------|-------------|-------------|
| C | 0.12504100  | -0.02021500 | 0.24632500  |
| C | -0.23413600 | 1.38227900  | 0.61856200  |
| C | -0.03875200 | 1.85334800  | 1.92370400  |
| C | -0.74707700 | 2.27731100  | -0.33252200 |
| C | -0.33159900 | 3.17295700  | 2.26786600  |
| H | 0.34684100  | 1.17072000  | 2.67714200  |
| C | -1.05055300 | 3.59222600  | 0.00785400  |
| H | -0.91462700 | 1.92736900  | -1.34681400 |
| C | -0.83960800 | 4.04671900  | 1.31000300  |
| H | -0.16965000 | 3.51334100  | 3.28627300  |
| H | -1.44771000 | 4.26585900  | -0.74576900 |
| H | -1.07130500 | 5.07393700  | 1.57442900  |
| C | -0.86096200 | -0.96325400 | -0.09205700 |

---

|   |            |             |             |
|---|------------|-------------|-------------|
| P | 1.84030800 | -0.42305200 | 0.09158100  |
| C | 2.83790800 | 1.09260900  | 0.23970900  |
| C | 2.73105200 | 2.00796100  | -0.98557100 |
| H | 3.87440200 | 0.78370800  | 0.41394500  |
| H | 2.49808900 | 1.61196200  | 1.14162200  |
| C | 3.21611700 | 3.42308500  | -0.67675100 |
| H | 3.31616700 | 1.58257700  | -1.81085100 |
| H | 1.69141600 | 2.05979300  | -1.32956400 |
| C | 3.11308200 | 4.34296500  | -1.88845700 |
| H | 2.61320400 | 3.82639100  | 0.14677000  |
| H | 4.25245300 | 3.38408300  | -0.31870300 |
| H | 3.46126200 | 5.35266200  | -1.65396500 |
| H | 3.71422000 | 3.96519400  | -2.72203600 |
| H | 2.07522300 | 4.41641100  | -2.23035800 |
| C | 2.21597000 | -1.15836800 | -1.53708300 |
| C | 3.69524900 | -1.49096200 | -1.75308100 |
| H | 1.85932300 | -0.43856500 | -2.28364100 |
| H | 1.60193300 | -2.05996100 | -1.64024300 |
| C | 3.95546100 | -1.98623800 | -3.17575900 |
| H | 4.31435900 | -0.60458500 | -1.56148000 |
| H | 4.01072100 | -2.26053700 | -1.03837800 |
| C | 5.42094400 | -2.34233500 | -3.40368100 |
| H | 3.32386700 | -2.86103600 | -3.37190700 |
| H | 3.64504600 | -1.21046900 | -3.88640600 |
| H | 5.59145000 | -2.69009400 | -4.42624200 |
| H | 6.06633200 | -1.47449300 | -3.23236100 |
| H | 5.74138900 | -3.13644200 | -2.72149700 |
| C | 2.47745100 | -1.58953000 | 1.34985100  |
| C | 2.06878700 | -1.22174200 | 2.77633900  |
| H | 3.56898300 | -1.59906400 | 1.24419900  |

---

|   |             |             |             |
|---|-------------|-------------|-------------|
| H | 2.11154700  | -2.58845300 | 1.08807900  |
| C | 2.64475700  | -2.19565700 | 3.80345600  |
| H | 2.40478600  | -0.20259200 | 3.01182000  |
| H | 0.97395800  | -1.21871800 | 2.84760800  |
| C | 2.22636100  | -1.84423100 | 5.22757800  |
| H | 2.31147700  | -3.21107200 | 3.55693500  |
| H | 3.73898600  | -2.19778700 | 3.72636200  |
| H | 2.64380800  | -2.54981900 | 5.95124900  |
| H | 2.56977300  | -0.84095400 | 5.50069400  |
| H | 1.13657700  | -1.86314200 | 5.33013400  |
| C | -0.50788500 | -2.36368900 | -0.02252600 |
| N | -0.20296000 | -3.47717500 | 0.09094800  |
| B | -2.35064800 | -0.77907200 | -0.52535800 |
| O | -3.28046600 | -1.82125200 | -0.32768000 |
| O | -3.00572800 | 0.45298000  | -0.70008000 |
| H | -1.42485000 | -1.02812200 | -1.56379000 |
| C | -4.54686500 | -1.30235300 | -0.76062400 |
| C | -5.65414100 | -2.00642800 | 0.00680400  |
| H | -6.62634100 | -1.55480200 | -0.21612400 |
| H | -5.69309500 | -3.06003600 | -0.28523700 |
| H | -5.48125300 | -1.95689200 | 1.08379500  |
| C | -4.68370400 | -1.57032000 | -2.25912700 |
| H | -5.66193200 | -1.26070400 | -2.63838700 |
| H | -3.90727000 | -1.04277000 | -2.82253200 |
| H | -4.56690900 | -2.64313700 | -2.43672200 |
| C | -4.39852900 | 0.21884300  | -0.44139200 |
| C | -4.64734100 | 0.53147900  | 1.03409300  |
| H | -4.30229700 | 1.54917600  | 1.23842700  |
| H | -5.70869700 | 0.46484800  | 1.29141700  |
| H | -4.08614600 | -0.15542400 | 1.67515900  |

---

|                   |             |             |             |
|-------------------|-------------|-------------|-------------|
| C                 | -5.22611000 | 1.13917900  | -1.32416000 |
| H                 | -4.94663400 | 1.03708900  | -2.37483600 |
| H                 | -6.29365400 | 0.91921300  | -1.21980600 |
| H                 | -5.06183400 | 2.17904900  | -1.02598800 |
| M4S <sub>CN</sub> |             |             |             |
| C                 | -0.12951300 | -0.84272700 | -0.42987000 |
| C                 | 0.02052500  | -2.26168800 | -0.04022800 |
| C                 | 0.12285400  | -3.29389200 | -0.99763500 |
| C                 | 0.03230100  | -2.66154100 | 1.31162600  |
| C                 | 0.24714900  | -4.62898300 | -0.62895500 |
| H                 | 0.12797200  | -3.04039800 | -2.05502300 |
| C                 | 0.18580300  | -3.99465200 | 1.68382700  |
| H                 | -0.10703400 | -1.90760100 | 2.08063200  |
| C                 | 0.29047700  | -4.99225300 | 0.71710000  |
| H                 | 0.32698700  | -5.39033200 | -1.40006000 |
| H                 | 0.19399000  | -4.25615800 | 2.73840000  |
| H                 | 0.39259700  | -6.03364300 | 1.00534100  |
| C                 | -1.08180000 | -0.56545100 | -1.62558100 |
| P                 | 1.07081900  | 0.32393000  | -0.02438000 |
| C                 | 0.35237500  | 2.01431000  | 0.07515500  |
| C                 | 1.14344000  | 3.14945800  | -0.57644500 |
| H                 | 0.21503900  | 2.20691900  | 1.14734900  |
| H                 | -0.65202200 | 1.96214500  | -0.35573900 |
| C                 | 0.39389500  | 4.47715600  | -0.47000200 |
| H                 | 2.13060900  | 3.24794300  | -0.10723000 |
| H                 | 1.31458500  | 2.92047400  | -1.63530400 |
| C                 | 1.16530000  | 5.63110100  | -1.10253600 |
| H                 | -0.58326600 | 4.37071200  | -0.95758600 |
| H                 | 0.19368400  | 4.69700500  | 0.58640400  |
| H                 | 0.61287200  | 6.57179000  | -1.02478300 |

---

|   |             |             |             |
|---|-------------|-------------|-------------|
| H | 2.13470000  | 5.76996100  | -0.61243600 |
| H | 1.35293700  | 5.43895800  | -2.16392800 |
| C | 2.52126200  | 0.43515500  | -1.16473000 |
| C | 3.31267700  | -0.87350900 | -1.20333600 |
| H | 3.16257500  | 1.27333800  | -0.86744000 |
| H | 2.12506700  | 0.66871800  | -2.15991300 |
| C | 4.44828600  | -0.83391500 | -2.22558700 |
| H | 3.73043800  | -1.08787500 | -0.21020200 |
| H | 2.63656900  | -1.70515300 | -1.44205400 |
| C | 5.24287800  | -2.13573900 | -2.26021000 |
| H | 4.02922400  | -0.62678800 | -3.21790100 |
| H | 5.11634700  | 0.00375900  | -1.98891300 |
| H | 6.04856100  | -2.09340600 | -2.99861300 |
| H | 5.69290200  | -2.34573900 | -1.28426200 |
| H | 4.59607100  | -2.98122600 | -2.51654100 |
| C | 1.81945800  | -0.00615000 | 1.61073900  |
| C | 2.96207000  | 0.94902200  | 1.96570900  |
| H | 2.16423800  | -1.04501500 | 1.63375800  |
| H | 1.00788100  | 0.08397200  | 2.34149000  |
| C | 3.45073200  | 0.73200000  | 3.39802600  |
| H | 3.80130400  | 0.80354900  | 1.27443100  |
| H | 2.63392000  | 1.99095500  | 1.85062100  |
| C | 4.60237400  | 1.66309100  | 3.76339800  |
| H | 2.61408000  | 0.88512800  | 4.09055000  |
| H | 3.76489400  | -0.31258000 | 3.51415000  |
| H | 4.93954200  | 1.49659300  | 4.79024200  |
| H | 5.45870300  | 1.50577800  | 3.09950800  |
| H | 4.30072500  | 2.71201900  | 3.67531800  |
| C | -0.65166100 | 0.47045900  | -2.55534000 |
| N | -0.29926700 | 1.32140300  | -3.25942900 |

---

|                    |             |             |             |
|--------------------|-------------|-------------|-------------|
| B                  | -2.39308700 | -0.19278100 | -0.83680400 |
| O                  | -3.19985200 | -1.14356200 | -0.27015900 |
| O                  | -2.79471400 | 1.09348500  | -0.57207100 |
| H                  | -1.23182100 | -1.47715100 | -2.21102700 |
| C                  | -4.32117900 | -0.44410700 | 0.32384500  |
| C                  | -4.70801900 | -1.14699400 | 1.61348100  |
| H                  | -5.48781500 | -0.58457000 | 2.13665200  |
| H                  | -5.09984000 | -2.14181700 | 1.38432800  |
| H                  | -3.84813800 | -1.26136700 | 2.27640000  |
| C                  | -5.46531500 | -0.50255000 | -0.68387300 |
| H                  | -6.37500200 | -0.04953600 | -0.28030400 |
| H                  | -5.19860300 | 0.01258000  | -1.61172900 |
| H                  | -5.67416200 | -1.54950200 | -0.91915200 |
| C                  | -3.75337200 | 1.00102900  | 0.51346300  |
| C                  | -2.96485900 | 1.16481300  | 1.80983100  |
| H                  | -2.45704300 | 2.13348800  | 1.79355000  |
| H                  | -3.62194700 | 1.13395700  | 2.68314600  |
| H                  | -2.20714100 | 0.37932200  | 1.90875400  |
| C                  | -4.77539200 | 2.11343200  | 0.36405700  |
| H                  | -5.23612000 | 2.10265500  | -0.62536600 |
| H                  | -5.56011000 | 2.01274500  | 1.12043800  |
| H                  | -4.28625200 | 3.08116500  | 0.50607000  |
| TS3S <sub>CN</sub> |             |             |             |
| C                  | -0.28783100 | -0.71554000 | -0.52364600 |
| C                  | -0.29181500 | -2.14999300 | -0.14309500 |
| C                  | -0.17626400 | -3.18133100 | -1.09526400 |
| C                  | -0.45799800 | -2.54428300 | 1.19823100  |
| C                  | -0.20336700 | -4.52302900 | -0.72722200 |
| H                  | -0.04447600 | -2.92667900 | -2.14388100 |
| C                  | -0.46024600 | -3.88515400 | 1.57302600  |



---

|   |             |             |             |
|---|-------------|-------------|-------------|
| H | -0.60455700 | -1.77724800 | 1.95363600  |
| C | -0.33646100 | -4.88675700 | 0.61214800  |
| H | -0.10749600 | -5.28900300 | -1.49167100 |
| H | -0.58586900 | -4.14771900 | 2.61970500  |
| H | -0.35405600 | -5.93308100 | 0.90014100  |
| C | -1.06625600 | -0.36415000 | -1.82828000 |
| P | 1.03930800  | 0.29579700  | -0.04483500 |
| C | 0.54986700  | 2.06668700  | 0.04307600  |
| C | 1.51832000  | 3.07657800  | -0.57510700 |
| H | 0.40776900  | 2.27660800  | 1.11120300  |
| H | -0.43761100 | 2.15286100  | -0.41803300 |
| C | 0.95495800  | 4.49547700  | -0.50648700 |
| H | 2.48745000  | 3.04134000  | -0.06120300 |
| H | 1.70272400  | 2.81782300  | -1.62457300 |
| C | 1.91203900  | 5.52711900  | -1.09506000 |
| H | 0.00067100  | 4.52160500  | -1.04706600 |
| H | 0.73065300  | 4.74757700  | 0.53771100  |
| H | 1.49159300  | 6.53557500  | -1.04719600 |
| H | 2.86315900  | 5.53432900  | -0.55234000 |
| H | 2.12864300  | 5.30352200  | -2.14470800 |
| C | 2.53127000  | 0.20637500  | -1.12318900 |
| C | 3.15456900  | -1.19102200 | -1.13007500 |
| H | 3.26014100  | 0.95777700  | -0.79722800 |
| H | 2.20938000  | 0.48652300  | -2.13320200 |
| C | 4.34436900  | -1.28519600 | -2.08485000 |
| H | 3.48465400  | -1.45881800 | -0.11719500 |
| H | 2.39715800  | -1.93179800 | -1.41644400 |
| C | 4.96812700  | -2.67727700 | -2.09621100 |
| H | 4.01458800  | -1.01647600 | -3.09587400 |
| H | 5.09754800  | -0.54176200 | -1.79509000 |

---

|   |             |             |             |
|---|-------------|-------------|-------------|
| H | 5.81646800  | -2.72978900 | -2.78441100 |
| H | 5.32696000  | -2.95388700 | -1.09933600 |
| H | 4.23636900  | -3.43029300 | -2.40667800 |
| C | 1.63920900  | -0.14488800 | 1.62256000  |
| C | 2.87042400  | 0.65669400  | 2.05399900  |
| H | 1.84961300  | -1.21892900 | 1.64512200  |
| H | 0.80389700  | 0.03889400  | 2.30806700  |
| C | 3.25685600  | 0.35612900  | 3.50226700  |
| H | 3.71836800  | 0.42046400  | 1.39906800  |
| H | 2.67783100  | 1.73277000  | 1.94794300  |
| C | 4.49169800  | 1.13494900  | 3.94397800  |
| H | 2.41061000  | 0.59700400  | 4.15712900  |
| H | 3.43736800  | -0.72059700 | 3.60836900  |
| H | 4.75367800  | 0.91108900  | 4.98177300  |
| H | 5.35566000  | 0.88686600  | 3.31886400  |
| H | 4.32252700  | 2.21392900  | 3.86594800  |
| C | -0.54272300 | 0.71035900  | -2.64393900 |
| N | -0.11768700 | 1.59310900  | -3.26493800 |
| B | -2.24317000 | 0.00892900  | -0.86901100 |
| O | -3.16196900 | -0.91638500 | -0.40268200 |
| O | -2.55694300 | 1.30562200  | -0.48880500 |
| H | -1.24314900 | -1.23741900 | -2.45769400 |
| C | -4.20465900 | -0.17427500 | 0.26319100  |
| C | -4.67186600 | -0.96326800 | 1.47542400  |
| H | -5.39219800 | -0.38208800 | 2.06016200  |
| H | -5.16314400 | -1.88326700 | 1.14612100  |
| H | -3.83189400 | -1.23649700 | 2.11755500  |
| C | -5.34623300 | -0.00675800 | -0.73691200 |
| H | -6.21004600 | 0.48676900  | -0.28235500 |
| H | -5.02311600 | 0.57805600  | -1.60349100 |

---

|                   |             |             |             |
|-------------------|-------------|-------------|-------------|
| H                 | -5.65616400 | -0.99562300 | -1.08554800 |
| C                 | -3.49853400 | 1.18015500  | 0.60020600  |
| C                 | -2.69473100 | 1.11820200  | 1.89718600  |
| H                 | -2.08118800 | 2.02068900  | 1.97550500  |
| H                 | -3.34917900 | 1.06912200  | 2.77189400  |
| H                 | -2.03154200 | 0.24666700  | 1.90293800  |
| C                 | -4.41242300 | 2.39341900  | 0.60045200  |
| H                 | -4.87490700 | 2.54371600  | -0.37685600 |
| H                 | -5.20113600 | 2.27849100  | 1.35081700  |
| H                 | -3.83421600 | 3.28832400  | 0.84802300  |
| M5S <sub>CN</sub> |             |             |             |
| C                 | -0.39833600 | -0.76883100 | -0.56990000 |
| C                 | 0.08897900  | -2.16337600 | -0.30615500 |
| C                 | 0.67068200  | -2.93659300 | -1.31981700 |
| C                 | 0.00491600  | -2.70622100 | 0.98188800  |
| C                 | 1.18605700  | -4.20067400 | -1.04672000 |
| H                 | 0.72961900  | -2.53347100 | -2.32804300 |
| C                 | 0.52666200  | -3.96799300 | 1.25956200  |
| H                 | -0.47528700 | -2.12725300 | 1.76639700  |
| C                 | 1.12492600  | -4.71695800 | 0.24773000  |
| H                 | 1.64094300  | -4.78137600 | -1.84373500 |
| H                 | 0.45652600  | -4.37070000 | 2.26553000  |
| H                 | 1.52848700  | -5.70150700 | 0.46263800  |
| C                 | -1.16231900 | -0.57440800 | -1.91989500 |
| P                 | 0.81185200  | 0.47446800  | -0.13160500 |
| C                 | 0.20216600  | 2.18188700  | -0.41886600 |
| C                 | 1.21958800  | 3.13249500  | -1.05030500 |
| H                 | -0.11975400 | 2.54313600  | 0.56441200  |
| H                 | -0.69975200 | 2.13052600  | -1.02752000 |
| C                 | 0.62616500  | 4.53020400  | -1.21954000 |

---

|   |             |             |             |
|---|-------------|-------------|-------------|
| H | 2.12836000  | 3.18961900  | -0.43681200 |
| H | 1.51700000  | 2.74864200  | -2.03390600 |
| C | 1.61782800  | 5.50567000  | -1.84507000 |
| H | -0.27145300 | 4.45767400  | -1.84567100 |
| H | 0.29836800  | 4.90551900  | -0.24208300 |
| H | 1.17663500  | 6.49888000  | -1.96607400 |
| H | 2.51243500  | 5.60946200  | -1.22212600 |
| H | 1.93692400  | 5.15778100  | -2.83282700 |
| C | 2.37180000  | 0.17963400  | -1.04621000 |
| C | 3.27213100  | -0.89259000 | -0.41182800 |
| H | 2.91829300  | 1.12297600  | -1.13718500 |
| H | 2.06715000  | -0.11351800 | -2.05924700 |
| C | 4.32479600  | -1.39542200 | -1.39826500 |
| H | 3.76712600  | -0.47290400 | 0.47276800  |
| H | 2.68199100  | -1.74752500 | -0.06444200 |
| C | 5.23653200  | -2.44554800 | -0.77232500 |
| H | 3.81437100  | -1.82146500 | -2.27127800 |
| H | 4.91847500  | -0.54876900 | -1.76448300 |
| H | 5.97812700  | -2.80909300 | -1.48895200 |
| H | 5.77400400  | -2.03638700 | 0.08940800  |
| H | 4.65370100  | -3.30546600 | -0.42498800 |
| C | 1.19497600  | 0.36200800  | 1.64397300  |
| C | 2.14913200  | 1.46155300  | 2.12488600  |
| H | 1.61853300  | -0.63004800 | 1.83398300  |
| H | 0.23585200  | 0.41855800  | 2.17277100  |
| C | 2.53365200  | 1.26444300  | 3.59128800  |
| H | 3.05984800  | 1.47040000  | 1.51155400  |
| H | 1.67802400  | 2.44473200  | 2.00327500  |
| C | 3.46170500  | 2.36433900  | 4.09632900  |
| H | 1.62173600  | 1.23647700  | 4.20006900  |

---

|                    |             |             |             |
|--------------------|-------------|-------------|-------------|
| H                  | 3.01707300  | 0.28656300  | 3.70578800  |
| H                  | 3.72877200  | 2.20843000  | 5.14508200  |
| H                  | 4.38873500  | 2.39210400  | 3.51439300  |
| H                  | 2.98594600  | 3.34688800  | 4.01338800  |
| C                  | -0.77733700 | 0.44817500  | -2.83263700 |
| N                  | -0.46897400 | 1.31383100  | -3.54826800 |
| B                  | -1.97494600 | -0.37542000 | -0.49479700 |
| O                  | -2.89540300 | -1.37885700 | -0.06521400 |
| O                  | -2.44953300 | 0.91438000  | -0.08740500 |
| H                  | -1.36814700 | -1.52144700 | -2.41266400 |
| C                  | -4.09289400 | -0.69122800 | 0.30080400  |
| C                  | -4.82779200 | -1.50652700 | 1.35405900  |
| H                  | -5.68936500 | -0.95482300 | 1.74480600  |
| H                  | -5.19335000 | -2.43770800 | 0.91058300  |
| H                  | -4.16690100 | -1.76323700 | 2.18493900  |
| C                  | -4.96245800 | -0.53355400 | -0.94828300 |
| H                  | -5.93387800 | -0.08584200 | -0.71724700 |
| H                  | -4.45822900 | 0.08826500  | -1.69471700 |
| H                  | -5.13263400 | -1.52239300 | -1.38396900 |
| C                  | -3.54261100 | 0.67998200  | 0.80509800  |
| C                  | -2.98730600 | 0.58421100  | 2.22738900  |
| H                  | -2.41760600 | 1.49301900  | 2.44595500  |
| H                  | -3.78220500 | 0.49009500  | 2.97364000  |
| H                  | -2.31882100 | -0.27834300 | 2.32053700  |
| C                  | -4.52316500 | 1.83799900  | 0.70031900  |
| H                  | -4.81001700 | 2.01755700  | -0.33789700 |
| H                  | -5.42603500 | 1.63806000  | 1.28697700  |
| H                  | -4.06119200 | 2.75094500  | 1.08880400  |
| TS4S <sub>CN</sub> |             |             |             |
| C                  | 0.36206500  | 0.81425500  | -0.66223300 |

---

|   |             |             |             |
|---|-------------|-------------|-------------|
| C | -0.32448500 | 2.14067600  | -0.42767000 |
| C | -1.07514200 | 2.74380500  | -1.44223600 |
| C | -0.26459700 | 2.75842700  | 0.82634600  |
| C | -1.79064000 | 3.91224900  | -1.19446200 |
| H | -1.09787200 | 2.28280800  | -2.42645300 |
| C | -0.97676100 | 3.92974200  | 1.07555600  |
| H | 0.34287800  | 2.31134100  | 1.60997900  |
| C | -1.75127600 | 4.50407200  | 0.06864100  |
| H | -2.37942600 | 4.36310000  | -1.98792100 |
| H | -0.92305500 | 4.39674100  | 2.05429100  |
| H | -2.30774200 | 5.41601800  | 0.26164600  |
| C | 0.95313200  | 0.56992000  | -2.06243700 |
| P | -0.71352200 | -0.54516700 | -0.10445800 |
| C | -0.00811900 | -2.17947800 | -0.55109400 |
| C | -1.00143500 | -3.17134700 | -1.15663100 |
| H | 0.43576900  | -2.57258900 | 0.36924600  |
| H | 0.81890200  | -1.99352700 | -1.23891200 |
| C | -0.29739400 | -4.46639400 | -1.55860100 |
| H | -1.80462600 | -3.39299500 | -0.44125400 |
| H | -1.46609600 | -2.73006200 | -2.04581000 |
| C | -1.26419200 | -5.48781900 | -2.14857800 |
| H | 0.48225100  | -4.22440200 | -2.29124600 |
| H | 0.21106000  | -4.89267100 | -0.68481300 |
| H | -0.74471300 | -6.40393200 | -2.44312200 |
| H | -2.03923500 | -5.75949600 | -1.42421400 |
| H | -1.76235400 | -5.08435200 | -3.03600200 |
| C | -2.38014100 | -0.32074600 | -0.82249900 |
| C | -3.28998700 | 0.63985200  | -0.03991100 |
| H | -2.85386900 | -1.30382600 | -0.90185400 |
| H | -2.21725400 | 0.03674300  | -1.84690400 |

---

|   |             |             |             |
|---|-------------|-------------|-------------|
| C | -4.48047900 | 1.08423200  | -0.88783100 |
| H | -3.64896400 | 0.14168500  | 0.86929900  |
| H | -2.74139000 | 1.53057500  | 0.28454200  |
| C | -5.39237200 | 2.04321100  | -0.13021100 |
| H | -4.10146600 | 1.57298300  | -1.79440900 |
| H | -5.04549400 | 0.20394900  | -1.21821100 |
| H | -6.23735800 | 2.36204200  | -0.74667000 |
| H | -5.79391900 | 1.57395200  | 0.77397700  |
| H | -4.84028800 | 2.93895800  | 0.17460400  |
| C | -0.86806100 | -0.49786500 | 1.70611600  |
| C | -1.67962200 | -1.67222200 | 2.26590500  |
| H | -1.32875700 | 0.45849200  | 1.97643300  |
| H | 0.15424000  | -0.50269100 | 2.10294700  |
| C | -1.89570800 | -1.53342900 | 3.77265100  |
| H | -2.65483200 | -1.73263700 | 1.76519400  |
| H | -1.15992600 | -2.61581800 | 2.05909900  |
| C | -2.67255800 | -2.70995900 | 4.35412800  |
| H | -0.92086000 | -1.44786000 | 4.26797000  |
| H | -2.43147600 | -0.59722200 | 3.97156500  |
| H | -2.82564000 | -2.59193400 | 5.43030500  |
| H | -3.65678500 | -2.80043900 | 3.88311100  |
| H | -2.13739300 | -3.65122400 | 4.19233000  |
| C | 0.33647800  | -0.29161300 | -2.97467000 |
| N | -0.16485200 | -1.07791600 | -3.69007200 |
| B | 1.83781400  | 0.57171600  | -0.20828600 |
| O | 2.31816300  | -0.62165900 | 0.33641600  |
| O | 2.77102600  | 1.59489200  | -0.11854500 |
| H | 1.40857600  | 1.45805400  | -2.48987000 |
| C | 3.62798900  | -0.34029200 | 0.87466300  |
| C | 4.52732200  | -1.54270800 | 0.64093800  |

---

|   |            |             |             |
|---|------------|-------------|-------------|
| H | 5.55345400 | -1.32110600 | 0.95145200  |
| H | 4.16870200 | -2.39102500 | 1.23127400  |
| H | 4.53263600 | -1.83442300 | -0.41102300 |
| C | 3.45266400 | -0.08690900 | 2.37023200  |
| H | 4.41408200 | 0.06748000  | 2.86841500  |
| H | 2.82349500 | 0.79186900  | 2.54481200  |
| H | 2.96737200 | -0.95715000 | 2.82174400  |
| C | 4.04323300 | 0.94758600  | 0.09232900  |
| C | 4.63471200 | 0.63366800  | -1.28054000 |
| H | 4.71938100 | 1.56555700  | -1.84681000 |
| H | 5.62942500 | 0.18724400  | -1.19618200 |
| H | 3.98556300 | -0.04675400 | -1.84014400 |
| C | 4.95332800 | 1.89086200  | 0.86020900  |
| H | 4.47440000 | 2.25154600  | 1.77270800  |
| H | 5.88940300 | 1.38965000  | 1.12668500  |
| H | 5.19569500 | 2.75514600  | 0.23536800  |

M6S<sub>CN</sub>

|   |             |             |             |
|---|-------------|-------------|-------------|
| C | -0.28664600 | -0.45464000 | -0.94428400 |
| C | 0.49291300  | -1.76227200 | -1.03915300 |
| C | 1.24283300  | -2.09040200 | -2.17248000 |
| C | 0.54096200  | -2.63108700 | 0.06075400  |
| C | 2.04964700  | -3.22801800 | -2.18932000 |
| H | 1.20189100  | -1.45701800 | -3.05121800 |
| C | 1.34094400  | -3.76927900 | 0.04583500  |
| H | -0.05195600 | -2.41011400 | 0.94654600  |
| C | 2.11027100  | -4.06642500 | -1.07887000 |
| H | 2.63100000  | -3.45867200 | -3.07710400 |
| H | 1.36042500  | -4.42573000 | 0.91037000  |
| H | 2.73971900  | -4.95075200 | -1.09338500 |
| C | -0.57991300 | 0.20983400  | -2.26352200 |



---

|   |             |             |             |
|---|-------------|-------------|-------------|
| P | 0.78401800  | 0.72745700  | 0.05801100  |
| C | 0.01184700  | 2.38564400  | 0.00192400  |
| C | 0.52516200  | 3.32893000  | -1.09078300 |
| H | 0.15124500  | 2.84017200  | 0.98850300  |
| H | -1.06003000 | 2.20614500  | -0.12428200 |
| C | -0.35141500 | 4.57772800  | -1.18666100 |
| H | 1.55967000  | 3.62452800  | -0.87766900 |
| H | 0.52647300  | 2.81427600  | -2.05796100 |
| C | 0.15376200  | 5.55536500  | -2.24266000 |
| H | -1.37448000 | 4.26561800  | -1.42688400 |
| H | -0.38956600 | 5.07178800  | -0.20740300 |
| H | -0.48641600 | 6.43975400  | -2.30556400 |
| H | 1.17046800  | 5.89236000  | -2.01409400 |
| H | 0.17166700  | 5.08398300  | -3.23066500 |
| C | 2.43675400  | 0.77701300  | -0.71766500 |
| C | 3.41297200  | -0.30369500 | -0.23078500 |
| H | 2.86212000  | 1.77246800  | -0.55432800 |
| H | 2.25441200  | 0.68168300  | -1.79620000 |
| C | 4.61650000  | -0.42560400 | -1.16386200 |
| H | 3.75543100  | -0.05846500 | 0.78252300  |
| H | 2.91955300  | -1.27984600 | -0.16925500 |
| C | 5.59357900  | -1.49868300 | -0.69577700 |
| H | 4.25544000  | -0.66902500 | -2.17132800 |
| H | 5.12500300  | 0.54368000  | -1.23756400 |
| H | 6.44532300  | -1.58813500 | -1.37563500 |
| H | 5.98217000  | -1.26940500 | 0.30193900  |
| H | 5.09793700  | -2.47429600 | -0.64555100 |
| C | 1.01721200  | 0.25769000  | 1.80908400  |
| C | 1.81858400  | 1.26702500  | 2.64062700  |
| H | 1.52129300  | -0.71555400 | 1.80384600  |

---

|   |             |             |             |
|---|-------------|-------------|-------------|
| H | 0.01737100  | 0.10803000  | 2.23309900  |
| C | 2.19116900  | 0.69211200  | 4.00742300  |
| H | 2.73475000  | 1.55816500  | 2.11016000  |
| H | 1.23173500  | 2.18121300  | 2.78336700  |
| C | 2.94553200  | 1.69832000  | 4.87033200  |
| H | 1.27746800  | 0.36982300  | 4.52184900  |
| H | 2.80221700  | -0.20721600 | 3.86160000  |
| H | 3.21222200  | 1.26977700  | 5.84030000  |
| H | 3.87021000  | 2.01910900  | 4.37949100  |
| H | 2.33799200  | 2.59052900  | 5.05319100  |
| C | -1.64182100 | 1.08810200  | -2.38630300 |
| N | -2.56661300 | 1.81669300  | -2.48311200 |
| B | -1.66942400 | -0.66441200 | -0.19121300 |
| O | -2.17773800 | 0.23969500  | 0.70314000  |
| O | -2.47636900 | -1.74428600 | -0.39346100 |
| H | 0.20386600  | 0.28817600  | -3.00815200 |
| C | -3.38361700 | -0.34322900 | 1.26703400  |
| C | -4.41314200 | 0.75778800  | 1.44868000  |
| H | -5.36711400 | 0.33647200  | 1.78037000  |
| H | -4.06648600 | 1.46131000  | 2.21070100  |
| H | -4.57092500 | 1.30646400  | 0.51813500  |
| C | -2.98764000 | -0.94155400 | 2.61286200  |
| H | -3.85402000 | -1.36307700 | 3.12971100  |
| H | -2.23788600 | -1.72988800 | 2.48973600  |
| H | -2.56281900 | -0.15298000 | 3.24037600  |
| C | -3.76340900 | -1.42391500 | 0.19860900  |
| C | -4.63823100 | -0.87630700 | -0.92476800 |
| H | -4.71151300 | -1.63345400 | -1.71000300 |
| H | -5.64634000 | -0.65177500 | -0.56547700 |
| H | -4.20623000 | 0.02863700  | -1.36344800 |

---

|                    |             |             |             |
|--------------------|-------------|-------------|-------------|
| C                  | -4.36677600 | -2.69451100 | 0.77172000  |
| H                  | -3.68144800 | -3.18916800 | 1.46260900  |
| H                  | -5.29839800 | -2.46760800 | 1.29937300  |
| H                  | -4.59564300 | -3.38745700 | -0.04231600 |
| TS5S <sub>CN</sub> |             |             |             |
| C                  | 0.69512600  | 0.91276400  | -0.97016900 |
| C                  | 0.06909900  | 2.22721800  | -0.57757000 |
| C                  | -0.59748600 | 3.04417200  | -1.49514600 |
| C                  | 0.10594800  | 2.63158600  | 0.76613500  |
| C                  | -1.23793900 | 4.21129900  | -1.07605400 |
| H                  | -0.62221900 | 2.77979400  | -2.54675500 |
| C                  | -0.51872200 | 3.80003500  | 1.18420500  |
| H                  | 0.62223700  | 2.00988000  | 1.49560800  |
| C                  | -1.20566900 | 4.59231300  | 0.26235000  |
| H                  | -1.75967700 | 4.82539800  | -1.80415100 |
| H                  | -0.47352800 | 4.09218400  | 2.22879900  |
| H                  | -1.70245500 | 5.50203800  | 0.58500100  |
| C                  | 0.77750100  | 0.58493100  | -2.35164200 |
| P                  | -0.83254400 | -0.44815300 | -0.09640600 |
| C                  | -0.39880000 | -2.12225900 | -0.72291800 |
| C                  | -1.50827900 | -2.91862500 | -1.41157800 |
| H                  | -0.00376900 | -2.66860700 | 0.14193800  |
| H                  | 0.44058100  | -1.98606800 | -1.41281900 |
| C                  | -1.03215800 | -4.31626600 | -1.80654900 |
| H                  | -2.38532400 | -3.00397300 | -0.75669600 |
| H                  | -1.83714600 | -2.38245600 | -2.31072600 |
| C                  | -2.11392500 | -5.11673200 | -2.52505800 |
| H                  | -0.14757700 | -4.22379200 | -2.44864100 |
| H                  | -0.70835700 | -4.85292200 | -0.90586900 |
| H                  | -1.75804200 | -6.11388600 | -2.79906100 |

---

|   |             |             |             |
|---|-------------|-------------|-------------|
| H | -2.99801900 | -5.23897300 | -1.89042700 |
| H | -2.43024600 | -4.61011000 | -3.44274400 |
| C | -2.36814700 | 0.10447300  | -0.93892700 |
| C | -3.14984400 | 1.17438400  | -0.16614600 |
| H | -3.01444500 | -0.75333000 | -1.15053300 |
| H | -2.03861200 | 0.49976800  | -1.91096000 |
| C | -4.19243200 | 1.86217500  | -1.04613700 |
| H | -3.64703300 | 0.71242800  | 0.69677900  |
| H | -2.47263800 | 1.93773000  | 0.23476800  |
| C | -4.96679600 | 2.93417200  | -0.28664400 |
| H | -3.68253900 | 2.31500200  | -1.90642400 |
| H | -4.88371400 | 1.11221700  | -1.45079800 |
| H | -5.70246800 | 3.42846800  | -0.92737200 |
| H | -5.50024000 | 2.50342100  | 0.56723800  |
| H | -4.28507300 | 3.70067300  | 0.09814600  |
| C | -1.27996600 | -0.66922400 | 1.67651400  |
| C | -2.35190600 | -1.72757500 | 1.95474800  |
| H | -1.59610600 | 0.31313000  | 2.04859500  |
| H | -0.34800400 | -0.92158500 | 2.19787600  |
| C | -2.72321900 | -1.79299500 | 3.43661900  |
| H | -3.25222300 | -1.51164500 | 1.36415100  |
| H | -1.98923800 | -2.71017400 | 1.62641300  |
| C | -3.77655600 | -2.85860600 | 3.72361100  |
| H | -1.81931400 | -1.99497400 | 4.02458400  |
| H | -3.09090400 | -0.81015500 | 3.75678600  |
| H | -4.03184400 | -2.89207600 | 4.78648600  |
| H | -4.69641100 | -2.66002000 | 3.16383700  |
| H | -3.41784500 | -3.85151900 | 3.43328200  |
| C | 1.71795700  | -0.34053900 | -2.82848600 |
| N | 2.51961100  | -1.09962200 | -3.21989200 |

---

|   |            |             |             |
|---|------------|-------------|-------------|
| B | 1.96956700 | 0.48293300  | -0.14165200 |
| O | 2.21028600 | -0.81086200 | 0.23248500  |
| O | 2.95885400 | 1.35002400  | 0.22558700  |
| H | 0.07272100 | 0.96911300  | -3.07922000 |
| C | 3.40569000 | -0.80412100 | 1.05545700  |
| C | 4.21086000 | -2.05523000 | 0.75162100  |
| H | 5.16859800 | -2.03014500 | 1.28064600  |
| H | 3.65736100 | -2.93659200 | 1.08728500  |
| H | 4.39795600 | -2.15400700 | -0.31933300 |
| C | 2.93663900 | -0.80247200 | 2.50680400  |
| H | 3.78280400 | -0.84925600 | 3.19773600  |
| H | 2.35180600 | 0.09558500  | 2.73143900  |
| H | 2.30517700 | -1.67945900 | 2.67493500  |
| C | 4.09262200 | 0.53599400  | 0.63115700  |
| C | 4.98034100 | 0.38472800  | -0.60049800 |
| H | 5.27000900 | 1.37969000  | -0.94861600 |
| H | 5.88777700 | -0.17918200 | -0.36797300 |
| H | 4.44743900 | -0.12117000 | -1.41221000 |
| C | 4.83729900 | 1.24999900  | 1.74497400  |
| H | 4.17253800 | 1.50828200  | 2.57154100  |
| H | 5.64540300 | 0.61785200  | 2.12600700  |
| H | 5.27909700 | 2.17150900  | 1.35644300  |

**(E)- $\beta$ -product<sub>CN</sub>**

|   |             |             |             |
|---|-------------|-------------|-------------|
| C | -0.98817200 | 1.00368500  | -0.05756000 |
| C | -2.22833600 | 0.19303800  | -0.05244900 |
| C | -3.40759500 | 0.65144100  | 0.55294400  |
| C | -2.23699600 | -1.06382800 | -0.67392500 |
| C | -4.56599300 | -0.11683700 | 0.51843500  |
| H | -3.41035700 | 1.60241100  | 1.07724100  |
| C | -3.39933300 | -1.82689300 | -0.71690100 |

---

|   |             |             |             |
|---|-------------|-------------|-------------|
| H | -1.32735900 | -1.44001900 | -1.13228100 |
| C | -4.56732200 | -1.35561600 | -0.12134200 |
| H | -5.46754900 | 0.24827900  | 1.00012600  |
| H | -3.39101600 | -2.79267300 | -1.21205700 |
| H | -5.47203900 | -1.95482100 | -0.14595300 |
| C | -1.06605200 | 2.35031200  | -0.06877000 |
| C | 0.07379600  | 3.21894300  | -0.03082300 |
| N | 0.95168100  | 3.97396000  | 0.00711500  |
| B | 0.40657200  | 0.26630300  | -0.02313200 |
| O | 1.55161200  | 0.80378000  | -0.53057500 |
| O | 0.57416200  | -0.96664400 | 0.53829100  |
| H | -2.01960900 | 2.87162500  | -0.10442400 |
| C | 2.55937800  | -0.24367800 | -0.48958800 |
| C | 3.90751700  | 0.38518800  | -0.18744300 |
| H | 4.66733700  | -0.39212100 | -0.06018800 |
| H | 4.20786200  | 1.02400100  | -1.02228500 |
| H | 3.87036600  | 0.99517900  | 0.71680500  |
| C | 2.56555700  | -0.89427600 | -1.86911200 |
| H | 3.34504000  | -1.65731100 | -1.94260100 |
| H | 1.59943000  | -1.35781200 | -2.09215500 |
| H | 2.75995200  | -0.12533300 | -2.62113900 |
| C | 2.00916500  | -1.18665500 | 0.62903500  |
| C | 2.42767900  | -0.75394900 | 2.03060500  |
| H | 1.85032500  | -1.32356500 | 2.76336600  |
| H | 3.49049900  | -0.94450100 | 2.20138500  |
| H | 2.23272200  | 0.31114000  | 2.18951400  |
| C | 2.29374900  | -2.66224800 | 0.41558600  |
| H | 1.85625200  | -3.02380700 | -0.51682300 |
| H | 3.37341900  | -2.83917400 | 0.39088200  |
| H | 1.87166200  | -3.23957300 | 1.24256300  |

---

**M4R<sub>CN</sub>**

|   |             |             |             |
|---|-------------|-------------|-------------|
| C | 0.13247100  | 0.53711800  | -0.74494800 |
| C | 0.46933400  | 1.97006500  | -0.56967200 |
| C | 0.36418500  | 2.59944000  | 0.68544000  |
| C | 0.91835500  | 2.76770600  | -1.64150600 |
| C | 0.75132400  | 3.92449200  | 0.87612500  |
| H | -0.03777600 | 2.03219600  | 1.52046000  |
| C | 1.27723100  | 4.09970400  | -1.46185700 |
| H | 1.01433800  | 2.32074100  | -2.62863400 |
| C | 1.21178900  | 4.68514400  | -0.19675800 |
| H | 0.66923500  | 4.36997100  | 1.86384800  |
| H | 1.62908500  | 4.67942600  | -2.31070500 |
| H | 1.50219600  | 5.72127100  | -0.05404700 |
| C | -0.78753700 | 0.20375100  | -1.94971600 |
| P | 1.17893200  | -0.66471800 | -0.09589200 |
| C | 2.07088800  | -0.05883200 | 1.37935900  |
| C | 3.21469000  | 0.92072000  | 1.08493600  |
| H | 2.45567500  | -0.94869100 | 1.89260700  |
| H | 1.33075600  | 0.39344800  | 2.04511700  |
| C | 3.67874200  | 1.63676400  | 2.35216800  |
| H | 4.05821600  | 0.37941600  | 0.63837100  |
| H | 2.90034100  | 1.67242000  | 0.35219400  |
| C | 4.79020900  | 2.64177000  | 2.06926100  |
| H | 2.81914200  | 2.15454500  | 2.79699700  |
| H | 4.01512600  | 0.89668300  | 3.08923000  |
| H | 5.11564500  | 3.14750100  | 2.98270500  |
| H | 5.66342900  | 2.14995600  | 1.62801400  |
| H | 4.44574900  | 3.40674800  | 1.36504300  |
| C | 2.53394800  | -1.25461100 | -1.20733600 |
| C | 3.52214100  | -2.26860300 | -0.62331500 |

---

|   |             |             |             |
|---|-------------|-------------|-------------|
| H | 3.05845800  | -0.34219400 | -1.52080100 |
| H | 2.05811600  | -1.66641500 | -2.10382700 |
| C | 4.69195000  | -2.53053100 | -1.57336300 |
| H | 3.91750400  | -1.91280300 | 0.33684300  |
| H | 3.00906500  | -3.21598800 | -0.41953600 |
| C | 5.67142200  | -3.56067300 | -1.01953800 |
| H | 4.30028300  | -2.87061000 | -2.53984200 |
| H | 5.21473800  | -1.58489700 | -1.76411800 |
| H | 6.50378900  | -3.73140100 | -1.70808900 |
| H | 6.08996200  | -3.22866200 | -0.06356600 |
| H | 5.17450500  | -4.52150700 | -0.84981600 |
| C | 0.27502300  | -2.17711900 | 0.39799800  |
| C | -0.49429600 | -2.03331000 | 1.71130600  |
| H | 0.99792400  | -2.99800800 | 0.46653400  |
| H | -0.41522500 | -2.41855900 | -0.41901600 |
| C | -1.36146700 | -3.26135200 | 1.98585600  |
| H | 0.21054600  | -1.89010900 | 2.54045100  |
| H | -1.13099300 | -1.13999000 | 1.66747900  |
| C | -1.99332700 | -3.23715300 | 3.37420900  |
| H | -2.13796700 | -3.31580800 | 1.21318200  |
| H | -0.75073700 | -4.16694500 | 1.87989700  |
| H | -2.65964500 | -4.09139700 | 3.52536000  |
| H | -1.22326300 | -3.27111600 | 4.15208900  |
| H | -2.57833800 | -2.32496500 | 3.53109100  |
| C | -0.49452800 | -1.00955300 | -2.69889200 |
| N | -0.27867200 | -1.99670900 | -3.26688900 |
| B | -2.16393200 | 0.14780000  | -1.19115300 |
| O | -2.68657700 | -0.97339700 | -0.59071800 |
| O | -2.93428200 | 1.26908900  | -1.02307900 |
| H | -0.78233000 | 1.03195800  | -2.66621800 |



---

|   |             |             |             |
|---|-------------|-------------|-------------|
| C | -4.01330400 | -0.60769200 | -0.12866400 |
| C | -4.30604200 | -1.32529400 | 1.17607100  |
| H | -5.25398600 | -0.97416400 | 1.59669900  |
| H | -4.38946500 | -2.40183500 | 1.00093400  |
| H | -3.51200000 | -1.15171500 | 1.90483300  |
| C | -4.99350300 | -1.04242600 | -1.21410400 |
| H | -6.02863700 | -0.86278700 | -0.91089700 |
| H | -4.80432200 | -0.50914900 | -2.15078200 |
| H | -4.86563100 | -2.11282300 | -1.39584000 |
| C | -3.90310400 | 0.94591100  | 0.00321700  |
| C | -3.29791500 | 1.38762400  | 1.33286300  |
| H | -3.05955500 | 2.45296700  | 1.27300800  |
| H | -3.99250800 | 1.23032300  | 2.16260600  |
| H | -2.37090400 | 0.84105100  | 1.53835400  |
| C | -5.19059000 | 1.70062800  | -0.27665700 |
| H | -5.54881600 | 1.51691400  | -1.29137700 |
| H | -5.96928800 | 1.40187100  | 0.43215100  |
| H | -5.01770700 | 2.77419100  | -0.16113300 |

TS3R<sub>CN</sub>

|   |             |            |             |
|---|-------------|------------|-------------|
| C | 0.05083500  | 0.52036600 | -0.74939500 |
| C | 0.46858200  | 1.93977300 | -0.59617000 |
| C | 0.31174100  | 2.60960600 | 0.63009600  |
| C | 1.05876500  | 2.66329300 | -1.64951600 |
| C | 0.77563800  | 3.91059900 | 0.81543700  |
| H | -0.18545500 | 2.09218300 | 1.44585200  |
| C | 1.50213300  | 3.97092200 | -1.47602200 |
| H | 1.19574800  | 2.17746700 | -2.61331200 |
| C | 1.37610900  | 4.59951700 | -0.23670200 |
| H | 0.65006200  | 4.39330200 | 1.78072100  |
| H | 1.96399700  | 4.49640900 | -2.30708600 |

---

|   |             |             |             |
|---|-------------|-------------|-------------|
| H | 1.72973500  | 5.61644100  | -0.09815800 |
| C | -0.76448800 | 0.20563600  | -2.03933100 |
| P | 1.10768300  | -0.68857900 | -0.09589000 |
| C | 1.94375200  | -0.08853600 | 1.41383100  |
| C | 3.11707300  | 0.86992100  | 1.17127800  |
| H | 2.28816500  | -0.98032700 | 1.95150100  |
| H | 1.17783900  | 0.38189800  | 2.03796200  |
| C | 3.53985500  | 1.57170300  | 2.46077600  |
| H | 3.96877300  | 0.31382400  | 0.75966600  |
| H | 2.84919300  | 1.63022800  | 0.42898900  |
| C | 4.68898400  | 2.54773300  | 2.23225500  |
| H | 2.67410600  | 2.11043400  | 2.86697900  |
| H | 3.82299800  | 0.82188400  | 3.21023300  |
| H | 4.98308200  | 3.04506900  | 3.16078100  |
| H | 5.56939400  | 2.03337100  | 1.83307000  |
| H | 4.39883600  | 3.32123700  | 1.51308100  |
| C | 2.48937300  | -1.21903600 | -1.19582900 |
| C | 3.45505600  | -2.26331800 | -0.62691000 |
| H | 3.02428900  | -0.29271100 | -1.44424600 |
| H | 2.04308800  | -1.58471300 | -2.12641200 |
| C | 4.68344800  | -2.44252300 | -1.52014000 |
| H | 3.78481700  | -1.97608000 | 0.38008500  |
| H | 2.94195700  | -3.22691800 | -0.52653000 |
| C | 5.63679900  | -3.50881300 | -0.98994500 |
| H | 4.35492300  | -2.70654400 | -2.53280900 |
| H | 5.20755600  | -1.48209200 | -1.60273000 |
| H | 6.51135800  | -3.61991300 | -1.63706000 |
| H | 5.99258100  | -3.25208500 | 0.01342900  |
| H | 5.13954500  | -4.48232600 | -0.92814400 |
| C | 0.20447000  | -2.21124200 | 0.35521300  |

---

|   |             |             |             |
|---|-------------|-------------|-------------|
| C | -0.57467800 | -2.09495100 | 1.66612700  |
| H | 0.93138300  | -3.02924800 | 0.41383200  |
| H | -0.47893800 | -2.43758900 | -0.47103300 |
| C | -1.45135000 | -3.32471100 | 1.89920500  |
| H | 0.12393500  | -1.97911700 | 2.50453100  |
| H | -1.20606500 | -1.19794400 | 1.63808100  |
| C | -2.09013200 | -3.33733600 | 3.28446700  |
| H | -2.22398300 | -3.34992400 | 1.12127800  |
| H | -0.84628900 | -4.23104600 | 1.76920500  |
| H | -2.76206200 | -4.19172400 | 3.40704300  |
| H | -1.32429700 | -3.39871500 | 4.06486200  |
| H | -2.67073700 | -2.42672600 | 3.46484700  |
| C | -0.49629100 | -1.02873500 | -2.74772500 |
| N | -0.30281900 | -2.03809200 | -3.28511300 |
| B | -2.05509100 | 0.20618200  | -1.15868200 |
| O | -2.62984600 | -0.91626800 | -0.58084600 |
| O | -2.80952600 | 1.34830800  | -0.97919800 |
| H | -0.72326600 | 1.03608500  | -2.74809400 |
| C | -3.95010400 | -0.51421300 | -0.14419600 |
| C | -4.30999800 | -1.25449300 | 1.13151500  |
| H | -5.25854500 | -0.88175500 | 1.53209600  |
| H | -4.42510300 | -2.32274500 | 0.92520900  |
| H | -3.53537800 | -1.12932400 | 1.89040500  |
| C | -4.91975100 | -0.88036600 | -1.26534200 |
| H | -5.95586300 | -0.67319100 | -0.98309900 |
| H | -4.68738600 | -0.32588200 | -2.17977300 |
| H | -4.82486100 | -1.94868100 | -1.47758400 |
| C | -3.78966700 | 1.03015400  | 0.03179400  |
| C | -3.19162600 | 1.41036500  | 1.38409200  |
| H | -2.91283800 | 2.46739000  | 1.35942900  |

---

|   |             |            |             |
|---|-------------|------------|-------------|
| H | -3.90660500 | 1.25652500 | 2.19727200  |
| H | -2.29093700 | 0.82203200 | 1.58945000  |
| C | -5.05082700 | 1.83370700 | -0.23621600 |
| H | -5.40168400 | 1.69434800 | -1.26060200 |
| H | -5.84781400 | 1.53773700 | 0.45336900  |
| H | -4.84655900 | 2.89742000 | -0.08456600 |

M5R<sub>CN</sub>

|   |             |             |             |
|---|-------------|-------------|-------------|
| C | 0.06977800  | -0.47675000 | -0.76406700 |
| C | -0.54567000 | -1.84583700 | -0.68357900 |
| C | -0.28980500 | -2.65583200 | 0.42905800  |
| C | -1.43209100 | -2.31116300 | -1.66258200 |
| C | -0.94254500 | -3.87641600 | 0.58582700  |
| H | 0.42584100  | -2.31338500 | 1.17177600  |
| C | -2.07790700 | -3.53640700 | -1.51450500 |
| H | -1.62438000 | -1.69800100 | -2.53998000 |
| C | -1.84418600 | -4.31720800 | -0.38283200 |
| H | -0.74035400 | -4.48881800 | 1.45958100  |
| H | -2.76890500 | -3.87897400 | -2.27880500 |
| H | -2.35110700 | -5.26972100 | -0.26282500 |
| C | 0.71713100  | -0.15040100 | -2.15010600 |
| P | -0.99559500 | 0.76139200  | -0.02222600 |
| C | -1.78288100 | 0.09313500  | 1.48427600  |
| C | -3.01269800 | -0.79680400 | 1.26715000  |
| H | -2.04949000 | 0.96066800  | 2.09970200  |
| H | -0.99826300 | -0.45011800 | 2.02422900  |
| C | -3.41348400 | -1.50697800 | 2.55936200  |
| H | -3.85003000 | -0.18528200 | 0.90773400  |
| H | -2.81940000 | -1.55160100 | 0.49817300  |
| C | -4.62909700 | -2.40616400 | 2.36197500  |
| H | -2.56297800 | -2.10711500 | 2.90723000  |

---

|   |             |             |             |
|---|-------------|-------------|-------------|
| H | -3.61508200 | -0.76394200 | 3.34098800  |
| H | -4.90151700 | -2.91951100 | 3.28826800  |
| H | -5.49744900 | -1.82743400 | 2.03045500  |
| H | -4.42478000 | -3.16785900 | 1.60181000  |
| C | -2.33354600 | 1.24286500  | -1.16357300 |
| C | -3.27802500 | 2.32267500  | -0.62454000 |
| H | -2.88136000 | 0.31658200  | -1.38021200 |
| H | -1.86680800 | 1.57213400  | -2.09768400 |
| C | -4.50795500 | 2.48378000  | -1.51793900 |
| H | -3.60382000 | 2.07707500  | 0.39478700  |
| H | -2.74593400 | 3.27896200  | -0.56559800 |
| C | -5.43871700 | 3.58699200  | -1.02514600 |
| H | -4.18092400 | 2.70086600  | -2.54197700 |
| H | -5.04792500 | 1.52957400  | -1.55704000 |
| H | -6.31547700 | 3.68560200  | -1.67102700 |
| H | -5.79165400 | 3.37753500  | -0.00994200 |
| H | -4.92466600 | 4.55340300  | -1.00716200 |
| C | -0.05997800 | 2.23698800  | 0.48699100  |
| C | 0.68713200  | 2.04283300  | 1.81156400  |
| H | -0.77351400 | 3.06527200  | 0.56106900  |
| H | 0.64435700  | 2.46642800  | -0.31796900 |
| C | 1.70961500  | 3.15501100  | 2.03026700  |
| H | -0.02737200 | 2.02615600  | 2.64344800  |
| H | 1.21458000  | 1.08229700  | 1.80076600  |
| C | 2.39804600  | 3.04614500  | 3.38682600  |
| H | 2.44891900  | 3.09592700  | 1.22308300  |
| H | 1.21619600  | 4.13120800  | 1.94089900  |
| H | 3.17735400  | 3.80479300  | 3.50278400  |
| H | 1.67939000  | 3.17560500  | 4.20303000  |
| H | 2.86540500  | 2.06327100  | 3.51239200  |

---

|                    |             |             |             |
|--------------------|-------------|-------------|-------------|
| C                  | 0.64763600  | 1.16634200  | -2.67803100 |
| N                  | 0.62275500  | 2.26307100  | -3.07018900 |
| B                  | 1.69268100  | -0.37256500 | -0.83573000 |
| O                  | 2.41268300  | 0.73675000  | -0.28456300 |
| O                  | 2.49608900  | -1.55045100 | -0.75707300 |
| H                  | 0.60179400  | -0.93631000 | -2.89132300 |
| C                  | 3.78612700  | 0.33530300  | -0.28536500 |
| C                  | 4.53388700  | 1.10449700  | 0.79212900  |
| H                  | 5.54815400  | 0.71000100  | 0.91647700  |
| H                  | 4.61405800  | 2.15973200  | 0.51263100  |
| H                  | 4.01292800  | 1.04239300  | 1.75080300  |
| C                  | 4.37686200  | 0.64317700  | -1.66286300 |
| H                  | 5.45288800  | 0.44730700  | -1.69859500 |
| H                  | 3.88614300  | 0.04673700  | -2.43840400 |
| H                  | 4.20811200  | 1.70064200  | -1.88669500 |
| C                  | 3.67267500  | -1.19978500 | -0.02528300 |
| C                  | 3.43004100  | -1.51318900 | 1.45256100  |
| H                  | 3.14108100  | -2.56431000 | 1.54644500  |
| H                  | 4.32458600  | -1.34611400 | 2.06066500  |
| H                  | 2.61793500  | -0.89394300 | 1.84986400  |
| C                  | 4.84475500  | -2.01744500 | -0.54787200 |
| H                  | 4.93897500  | -1.92157500 | -1.63158100 |
| H                  | 5.78294900  | -1.69726500 | -0.08228000 |
| H                  | 4.69199400  | -3.07502300 | -0.31176900 |
| TS4R <sub>CN</sub> |             |             |             |
| C                  | -0.21368500 | -0.65343100 | 0.96415600  |
| C                  | 0.43023300  | -2.01863100 | 0.82466600  |
| C                  | 0.09236700  | -2.85423200 | -0.24541300 |
| C                  | 1.39942900  | -2.44928100 | 1.73688300  |
| C                  | 0.73756400  | -4.07682500 | -0.42307000 |

---

|   |             |             |             |
|---|-------------|-------------|-------------|
| H | -0.68235600 | -2.54185400 | -0.94129400 |
| C | 2.05013700  | -3.66678000 | 1.55796900  |
| H | 1.63813700  | -1.81716400 | 2.58912000  |
| C | 1.72597900  | -4.48151700 | 0.47244700  |
| H | 0.46632200  | -4.71372700 | -1.25985300 |
| H | 2.80831400  | -3.98346200 | 2.26778500  |
| H | 2.23077800  | -5.43268100 | 0.33468300  |
| C | -0.71651100 | -0.25778500 | 2.36035100  |
| P | 0.86375100  | 0.60934000  | 0.21359800  |
| C | 1.13759000  | 0.11931900  | -1.52779500 |
| C | 2.31000600  | -0.85144600 | -1.74372900 |
| H | 1.28651500  | 1.02608400  | -2.12143600 |
| H | 0.19326900  | -0.32855300 | -1.86091100 |
| C | 2.21943400  | -1.53254700 | -3.10811700 |
| H | 3.25628000  | -0.30215700 | -1.66766900 |
| H | 2.33114500  | -1.62437700 | -0.96793600 |
| C | 3.38341500  | -2.48861300 | -3.34563500 |
| H | 1.27140000  | -2.08309100 | -3.16353900 |
| H | 2.18751400  | -0.77144000 | -3.89748400 |
| H | 3.30411200  | -2.98006500 | -4.31918700 |
| H | 4.34070700  | -1.95824800 | -3.31334500 |
| H | 3.40662900  | -3.26732700 | -2.57572500 |
| C | 2.49481700  | 0.68165800  | 1.02122300  |
| C | 3.38993000  | 1.78597100  | 0.44334600  |
| H | 2.96126800  | -0.30152900 | 0.89754700  |
| H | 2.32379100  | 0.84230600  | 2.09106900  |
| C | 4.81728700  | 1.67893000  | 0.97997900  |
| H | 3.41308400  | 1.73118500  | -0.65314400 |
| H | 2.98002100  | 2.76944000  | 0.70107600  |
| C | 5.71459700  | 2.79610600  | 0.45787100  |

---

|   |             |             |             |
|---|-------------|-------------|-------------|
| H | 4.78974500  | 1.70257100  | 2.07597900  |
| H | 5.23212300  | 0.70350200  | 0.69739100  |
| H | 6.73292800  | 2.70127400  | 0.84464400  |
| H | 5.76782900  | 2.77731600  | -0.63570600 |
| H | 5.33199700  | 3.77722900  | 0.75701700  |
| C | 0.10030600  | 2.27415400  | 0.34674400  |
| C | -0.17305800 | 2.97206600  | -0.98576700 |
| H | 0.76335000  | 2.87180300  | 0.98019600  |
| H | -0.83470400 | 2.13538700  | 0.89302300  |
| C | -0.91316600 | 4.29109100  | -0.76954000 |
| H | 0.76830000  | 3.16674800  | -1.51561700 |
| H | -0.78062500 | 2.31770600  | -1.62210200 |
| C | -1.21564300 | 5.00378200  | -2.08366500 |
| H | -1.84758600 | 4.08859400  | -0.23153600 |
| H | -0.31411400 | 4.94068700  | -0.11971000 |
| H | -1.74609200 | 5.94478900  | -1.91382200 |
| H | -0.29336900 | 5.23242000  | -2.62788300 |
| H | -1.83938800 | 4.37893500  | -2.73168200 |
| C | -0.14246300 | 0.77314300  | 3.09587900  |
| N | 0.33245100  | 1.68995200  | 3.66148600  |
| B | -1.69794100 | -0.48776200 | 0.49224100  |
| O | -2.19652300 | 0.59253800  | -0.22738100 |
| O | -2.63943500 | -1.49647600 | 0.63033100  |
| H | -1.17149400 | -1.06952600 | 2.91684900  |
| C | -3.63547000 | 0.45078200  | -0.21496900 |
| C | -4.19786700 | 1.08782000  | -1.47358100 |
| H | -5.27603000 | 0.91223600  | -1.54335600 |
| H | -4.03058300 | 2.16888800  | -1.44347000 |
| H | -3.71795200 | 0.69117800  | -2.37066100 |
| C | -4.15370800 | 1.16746800  | 1.02925500  |



---

|   |             |             |             |
|---|-------------|-------------|-------------|
| H | -5.24539400 | 1.13544400  | 1.08292400  |
| H | -3.74012400 | 0.72077100  | 1.93876100  |
| H | -3.84077800 | 2.21492800  | 0.99085800  |
| C | -3.80077000 | -1.10029500 | -0.12889800 |
| C | -3.69641900 | -1.77631900 | -1.49438100 |
| H | -3.59816400 | -2.85539200 | -1.34661900 |
| H | -4.58432100 | -1.58941700 | -2.10521800 |
| H | -2.81643100 | -1.42035100 | -2.04044200 |
| C | -5.05059900 | -1.56470000 | 0.59983800  |
| H | -5.05685300 | -1.21887500 | 1.63522500  |
| H | -5.94925000 | -1.19319900 | 0.09697800  |
| H | -5.08838400 | -2.65778300 | 0.60276800  |

**M6R<sub>CN</sub>**

|   |             |             |             |
|---|-------------|-------------|-------------|
| C | 0.34055400  | -0.63453300 | -1.07900700 |
| C | -0.11630000 | -2.08238700 | -0.91359100 |
| C | 0.38264900  | -2.87555000 | 0.12566700  |
| C | -1.06885800 | -2.63131900 | -1.77821100 |
| C | -0.07837800 | -4.17751800 | 0.31468300  |
| H | 1.14099800  | -2.47366800 | 0.79468600  |
| C | -1.53943900 | -3.92706700 | -1.58574600 |
| H | -1.43448700 | -2.02949200 | -2.60676800 |
| C | -1.04854900 | -4.70373400 | -0.53530600 |
| H | 0.32217000  | -4.77950700 | 1.12494800  |
| H | -2.28653300 | -4.33509000 | -2.25984900 |
| H | -1.41116000 | -5.71653500 | -0.38988200 |
| C | 0.62344000  | -0.15040800 | -2.49700800 |
| P | -0.87244900 | 0.45970500  | -0.23942200 |
| C | -0.90743500 | 0.01688800  | 1.53809600  |
| C | -1.88418500 | -1.11314700 | 1.89970200  |
| H | -1.15280500 | 0.91931200  | 2.10675600  |

---

|   |             |             |             |
|---|-------------|-------------|-------------|
| H | 0.12193000  | -0.25231800 | 1.80168400  |
| C | -1.57301400 | -1.69292800 | 3.27847400  |
| H | -2.91096200 | -0.72823400 | 1.88507300  |
| H | -1.84125100 | -1.92228300 | 1.16267100  |
| C | -2.54358800 | -2.80543300 | 3.66068900  |
| H | -0.54678700 | -2.08254100 | 3.27317000  |
| H | -1.60072900 | -0.89276300 | 4.02839200  |
| H | -2.30601400 | -3.22287400 | 4.64299700  |
| H | -3.57321300 | -2.43463400 | 3.69295600  |
| H | -2.50485900 | -3.62016300 | 2.92967800  |
| C | -2.56855500 | 0.24369000  | -0.86872100 |
| C | -3.54321300 | 1.25827100  | -0.25603600 |
| H | -2.87778600 | -0.78197000 | -0.64259100 |
| H | -2.53334100 | 0.35420400  | -1.95707600 |
| C | -4.98166700 | 0.97383400  | -0.68789000 |
| H | -3.48477300 | 1.23687900  | 0.84041900  |
| H | -3.26539600 | 2.27272000  | -0.56763200 |
| C | -5.96570800 | 1.99274900  | -0.12272000 |
| H | -5.03167200 | 0.97348900  | -1.78327700 |
| H | -5.25956700 | -0.03560500 | -0.36051900 |
| H | -6.98949400 | 1.77320700  | -0.43780100 |
| H | -5.94454000 | 1.99320100  | 0.97211900  |
| H | -5.71975300 | 3.00406200  | -0.46221100 |
| C | -0.39871500 | 2.20983500  | -0.50844500 |
| C | -0.40582300 | 3.08370700  | 0.74506400  |
| H | -1.08428100 | 2.59562900  | -1.27075400 |
| H | 0.59833800  | 2.18559400  | -0.95505400 |
| C | -0.03799200 | 4.52937400  | 0.41367800  |
| H | -1.39397200 | 3.06331100  | 1.22321200  |
| H | 0.31318300  | 2.68092000  | 1.46926100  |

---

|   |             |             |             |
|---|-------------|-------------|-------------|
| C | -0.00460400 | 5.41331600  | 1.65627500  |
| H | 0.94038000  | 4.54552000  | -0.08204700 |
| H | -0.75978700 | 4.92763100  | -0.30970000 |
| H | 0.25740100  | 6.44467000  | 1.40463200  |
| H | -0.97989100 | 5.42703100  | 2.15389200  |
| H | 0.73278400  | 5.04583500  | 2.37766300  |
| C | -0.27451600 | 0.58971900  | -3.24109400 |
| N | -1.04118000 | 1.27276300  | -3.82575600 |
| B | 1.76188100  | -0.31885000 | -0.46318500 |
| O | 2.03008700  | 0.74015300  | 0.37727100  |
| O | 2.87423400  | -1.06539900 | -0.75235000 |
| H | 1.40709700  | -0.68399500 | -3.02223800 |
| C | 3.47397500  | 0.90018400  | 0.37916000  |
| C | 3.90611900  | 1.44524300  | 1.72785100  |
| H | 4.99808200  | 1.48662600  | 1.78823000  |
| H | 3.51926600  | 2.46075300  | 1.85358400  |
| H | 3.53138600  | 0.82908000  | 2.54753500  |
| C | 3.80635000  | 1.88493600  | -0.73742700 |
| H | 4.88068400  | 2.08013300  | -0.79025500 |
| H | 3.46513200  | 1.50666900  | -1.70684100 |
| H | 3.29365900  | 2.83048900  | -0.53870600 |
| C | 3.95324400  | -0.55370500 | 0.06970100  |
| C | 4.01524300  | -1.43135200 | 1.31656200  |
| H | 4.13138700  | -2.47392200 | 1.00837200  |
| H | 4.86222800  | -1.16022700 | 1.95288600  |
| H | 3.09570200  | -1.34507300 | 1.90521500  |
| C | 5.25128900  | -0.64007900 | -0.71313700 |
| H | 5.16037500  | -0.15487000 | -1.68670600 |
| H | 6.06501300  | -0.16592700 | -0.15546200 |
| H | 5.51293200  | -1.68949400 | -0.87404700 |

---

**TS5R<sub>CN</sub>**

|   |             |             |             |
|---|-------------|-------------|-------------|
| C | 0.35800500  | -0.92099900 | -1.26433300 |
| C | -0.27516500 | -2.19861000 | -0.76739600 |
| C | 0.40171000  | -2.97947900 | 0.17864600  |
| C | -1.54907100 | -2.62018300 | -1.17558700 |
| C | -0.17585500 | -4.12736900 | 0.71698900  |
| H | 1.40097200  | -2.69906300 | 0.50024000  |
| C | -2.12831300 | -3.76594300 | -0.63790200 |
| H | -2.10103800 | -2.04610500 | -1.91093400 |
| C | -1.44931400 | -4.52194800 | 0.31647300  |
| H | 0.37313600  | -4.71099400 | 1.44966100  |
| H | -3.11883200 | -4.06641300 | -0.96572400 |
| H | -1.90592400 | -5.41219300 | 0.73732500  |
| C | 0.34152800  | -0.57512400 | -2.64313100 |
| P | -0.89133600 | 0.58767300  | -0.15063900 |
| C | -1.10424000 | 0.60831800  | 1.68160000  |
| C | -1.89706800 | -0.61434000 | 2.15689700  |
| H | -1.59247700 | 1.53579700  | 2.00429600  |
| H | -0.09383600 | 0.59844400  | 2.10608100  |
| C | -1.91242000 | -0.74584400 | 3.67888300  |
| H | -2.92989200 | -0.55057200 | 1.78983900  |
| H | -1.46983900 | -1.52901900 | 1.72448500  |
| C | -2.69074900 | -1.97591900 | 4.13582900  |
| H | -0.87930100 | -0.80364200 | 4.04326500  |
| H | -2.34887500 | 0.15956100  | 4.11889000  |
| H | -2.68038600 | -2.07734100 | 5.22470000  |
| H | -3.73570100 | -1.91997100 | 3.81348100  |
| H | -2.26010200 | -2.88751400 | 3.70732100  |
| C | -2.59922700 | 0.55428600  | -0.83003300 |
| C | -3.51091500 | 1.67764100  | -0.32828000 |

---

|   |             |             |             |
|---|-------------|-------------|-------------|
| H | -3.03910300 | -0.41840700 | -0.58640300 |
| H | -2.49609700 | 0.59333400  | -1.92270200 |
| C | -4.88157400 | 1.64889400  | -1.00552200 |
| H | -3.64409800 | 1.58363000  | 0.75758500  |
| H | -3.04306300 | 2.65541900  | -0.50273800 |
| C | -5.80431900 | 2.75070100  | -0.49381000 |
| H | -4.74752400 | 1.74839200  | -2.08951200 |
| H | -5.34406900 | 0.66840200  | -0.83771700 |
| H | -6.77833300 | 2.71848200  | -0.99004100 |
| H | -5.97347700 | 2.65131600  | 0.58351300  |
| H | -5.36974100 | 3.73978000  | -0.67271200 |
| C | -0.21903700 | 2.21687500  | -0.70107400 |
| C | 0.21351500  | 3.16571700  | 0.41613600  |
| H | -0.96820700 | 2.69792200  | -1.33978600 |
| H | 0.63896900  | 1.98591300  | -1.34675300 |
| C | 0.79815600  | 4.46634300  | -0.13427700 |
| H | -0.64014200 | 3.40390300  | 1.06289400  |
| H | 0.95874000  | 2.66381700  | 1.04632500  |
| C | 1.33965300  | 5.36727700  | 0.97128900  |
| H | 1.59899200  | 4.23096400  | -0.84685100 |
| H | 0.02454300  | 4.99575100  | -0.70409800 |
| H | 1.74314300  | 6.30026800  | 0.56804500  |
| H | 0.55296800  | 5.62398100  | 1.68850900  |
| H | 2.14171100  | 4.86595900  | 1.52454100  |
| C | -0.66228500 | -0.92075500 | -3.55942200 |
| N | -1.48666700 | -1.19970800 | -4.34247300 |
| B | 1.76324400  | -0.57026900 | -0.61582600 |
| O | 1.94891200  | 0.34459600  | 0.38943100  |
| O | 2.92981700  | -1.13434900 | -1.04502600 |
| H | 1.08899600  | 0.11524700  | -3.02127700 |

---

|   |            |             |             |
|---|------------|-------------|-------------|
| C | 3.37733800 | 0.60553300  | 0.46638600  |
| C | 3.75046500 | 0.87976300  | 1.91204800  |
| H | 4.83481500 | 0.99164200  | 2.00833700  |
| H | 3.28248400 | 1.81301800  | 2.23965600  |
| H | 3.41898200 | 0.07684800  | 2.57297400  |
| C | 3.64530800 | 1.83392200  | -0.39692600 |
| H | 4.70144400 | 2.11492400  | -0.36610300 |
| H | 3.36112200 | 1.65515700  | -1.43940400 |
| H | 3.05508900 | 2.67138200  | -0.01419000 |
| C | 3.97907600 | -0.70478800 | -0.13664700 |
| C | 4.15459800 | -1.80816700 | 0.90174300  |
| H | 4.34634400 | -2.75260200 | 0.38555400  |
| H | 4.99982700 | -1.59482600 | 1.56190700  |
| H | 3.25685300 | -1.92377800 | 1.51641500  |
| C | 5.25971300 | -0.51179500 | -0.92918000 |
| H | 5.10598100 | 0.15207100  | -1.78188400 |
| H | 6.04204100 | -0.09181900 | -0.28941500 |
| H | 5.60645900 | -1.47887800 | -1.30322700 |

**(Z)- $\beta$ -product<sub>CN</sub>**

|   |            |             |             |
|---|------------|-------------|-------------|
| C | 0.88469400 | 0.81046500  | 0.01393000  |
| C | 1.97053600 | -0.19542300 | 0.01277900  |
| C | 1.84681200 | -1.34603600 | 0.80470800  |
| C | 3.12176100 | -0.03310000 | -0.77005000 |
| C | 2.86689000 | -2.29069400 | 0.84103800  |
| H | 0.95001100 | -1.48989200 | 1.39890400  |
| C | 4.13433000 | -0.98704000 | -0.74262200 |
| H | 3.21404400 | 0.83084600  | -1.42110500 |
| C | 4.01333300 | -2.11368900 | 0.06812700  |
| H | 2.76421400 | -3.16951000 | 1.46976200  |
| H | 5.01675800 | -0.85125900 | -1.35982900 |

---

|                   |             |             |             |
|-------------------|-------------|-------------|-------------|
| H                 | 4.80543500  | -2.85559100 | 0.09079000  |
| C                 | 1.09625200  | 2.14238400  | 0.03631300  |
| C                 | 2.38701900  | 2.76297000  | 0.12128100  |
| N                 | 3.40973900  | 3.30135500  | 0.20272300  |
| B                 | -0.62628200 | 0.36128400  | -0.01474100 |
| O                 | -1.64685100 | 1.26976800  | -0.03519300 |
| O                 | -1.04239600 | -0.93718200 | -0.03074900 |
| H                 | 0.25775100  | 2.83309100  | 0.02361700  |
| C                 | -2.87395200 | 0.52134100  | 0.17903200  |
| C                 | -3.99101500 | 1.16857700  | -0.61959700 |
| H                 | -4.90367400 | 0.56897000  | -0.54804000 |
| H                 | -4.20227900 | 2.16171700  | -0.21395400 |
| H                 | -3.72124800 | 1.27559600  | -1.67176100 |
| C                 | -3.17267900 | 0.58894700  | 1.67345100  |
| H                 | -4.11954500 | 0.09607600  | 1.90938000  |
| H                 | -2.37683000 | 0.11680100  | 2.25756600  |
| H                 | -3.24325700 | 1.63795500  | 1.97241900  |
| C                 | -2.47207700 | -0.91256900 | -0.29901100 |
| C                 | -2.63552700 | -1.10727100 | -1.80302500 |
| H                 | -2.15104900 | -2.04331600 | -2.09248700 |
| H                 | -3.69152700 | -1.16184100 | -2.08077200 |
| H                 | -2.16761400 | -0.29003300 | -2.36025800 |
| C                 | -3.13437700 | -2.04645700 | 0.46258100  |
| H                 | -2.89198400 | -2.01069100 | 1.52623200  |
| H                 | -4.22130100 | -1.99530200 | 0.34614400  |
| H                 | -2.79269100 | -3.00463500 | 0.06195900  |
| M7S <sub>CN</sub> |             |             |             |
| P                 | -1.24158800 | 0.31124600  | 0.59000500  |
| C                 | -2.75344200 | -0.37352900 | 1.36807800  |
| C                 | -0.26804300 | 0.83726100  | 2.06549800  |

---

|   |             |             |             |
|---|-------------|-------------|-------------|
| C | -3.82077000 | -0.87439600 | 0.39985700  |
| H | -2.44667400 | -1.15521600 | 2.07126900  |
| H | -3.14879800 | 0.44483000  | 1.98153000  |
| C | -1.74323000 | 1.86563000  | -0.23462600 |
| C | -0.48528500 | -0.72298900 | -0.59961900 |
| C | 0.62494900  | -0.27452700 | 2.61987700  |
| H | 0.34798900  | 1.68868800  | 1.76050700  |
| H | -0.98080400 | 1.18265100  | 2.82494000  |
| C | -5.07744400 | -1.35264400 | 1.12554200  |
| H | -3.41872400 | -1.69525100 | -0.20772200 |
| H | -4.08914500 | -0.06425000 | -0.29334900 |
| C | -2.72549000 | 2.72464900  | 0.56481900  |
| H | -2.16070700 | 1.60372500  | -1.21371400 |
| H | -0.82124800 | 2.43125000  | -0.41718600 |
| C | 0.35378200  | 0.04777400  | -1.64897800 |
| C | 1.35163800  | 0.15352300  | 3.89362800  |
| H | 0.03463600  | -1.17747200 | 2.82541500  |
| H | 1.35932900  | -0.55014600 | 1.85196500  |
| C | -6.14645000 | -1.84703100 | 0.15654000  |
| H | -5.47592300 | -0.53245000 | 1.73539600  |
| H | -4.80365900 | -2.15568400 | 1.82103600  |
| C | -2.95216400 | 4.07910900  | -0.10672400 |
| H | -3.68703800 | 2.20433400  | 0.65640900  |
| H | -2.35079200 | 2.88289300  | 1.58480400  |
| C | 2.31782000  | -0.91703000 | 4.39111700  |
| H | 0.61385700  | 0.38204000  | 4.67292600  |
| H | 1.89707100  | 1.08572000  | 3.69959400  |
| H | -6.44972100 | -1.05022900 | -0.53080300 |
| H | -5.77258300 | -2.68222000 | -0.44475700 |
| H | -7.03938500 | -2.18893800 | 0.68699500  |



---

|   |             |             |             |
|---|-------------|-------------|-------------|
| C | -3.96532200 | 4.93547600  | 0.64587200  |
| H | -3.29221000 | 3.91463900  | -1.13654400 |
| H | -1.99451800 | 4.60900500  | -0.17665300 |
| H | 3.07719400  | -1.14049700 | 3.63342700  |
| H | 1.78836200  | -1.85004400 | 4.61067900  |
| H | 2.83438500  | -0.60109800 | 5.30190000  |
| H | -3.63132100 | 5.12778300  | 1.67081700  |
| H | -4.11271000 | 5.90129300  | 0.15482200  |
| H | -4.93773800 | 4.43523400  | 0.70040100  |
| B | 1.79950000  | 0.47943700  | -1.15875000 |
| O | 2.97626800  | 0.18676200  | -1.78682100 |
| O | 1.95788400  | 1.21974300  | -0.01866700 |
| H | -0.16682000 | 0.97681300  | -1.91908500 |
| C | 4.04210200  | 0.55860900  | -0.87008400 |
| C | 5.22937000  | 1.05892800  | -1.67244900 |
| H | 6.00900600  | 1.43233800  | -1.00121900 |
| H | 5.64768500  | 0.23590600  | -2.25804200 |
| H | 4.94106000  | 1.85817400  | -2.35762900 |
| C | 4.40988900  | -0.70005300 | -0.08984500 |
| H | 5.25793300  | -0.51709700 | 0.57583200  |
| H | 3.56469100  | -1.05913500 | 0.50693600  |
| H | 4.68679500  | -1.48663700 | -0.79749500 |
| C | 3.34774600  | 1.64211500  | 0.01794000  |
| C | 3.39881800  | 3.03755900  | -0.59564500 |
| H | 2.72816300  | 3.69442700  | -0.03514200 |
| H | 4.40904900  | 3.45296400  | -0.54990100 |
| H | 3.07285300  | 3.02139500  | -1.64010000 |
| C | 3.81248500  | 1.67348400  | 1.46263900  |
| H | 3.62020900  | 0.72232300  | 1.96477300  |
| H | 4.88467500  | 1.88812100  | 1.51165900  |

---

|                    |             |             |             |
|--------------------|-------------|-------------|-------------|
| H                  | 3.28295100  | 2.46502300  | 2.00109700  |
| O                  | -1.57629000 | 1.59377000  | -3.73898800 |
| H                  | -2.01944300 | 0.77126100  | -3.44843300 |
| H                  | -0.93195100 | 1.28704800  | -4.38920500 |
| O                  | -2.59505700 | -0.72671600 | -2.65657200 |
| H                  | -2.00079900 | -0.86627300 | -1.87537900 |
| H                  | -3.49445800 | -0.74613300 | -2.30726100 |
| C                  | 0.00179400  | -2.05957200 | -0.21610500 |
| C                  | -0.76335700 | -2.94721500 | 0.57776600  |
| C                  | 1.24638200  | -2.56012900 | -0.66267200 |
| C                  | -0.29826000 | -4.20338200 | 0.94291100  |
| H                  | -1.75770400 | -2.65826100 | 0.89741100  |
| C                  | 1.70495600  | -3.82638700 | -0.30507000 |
| H                  | 1.88673200  | -1.95907000 | -1.29952500 |
| C                  | 0.94784000  | -4.65997100 | 0.51146200  |
| H                  | -0.92759700 | -4.84037100 | 1.55855300  |
| H                  | 2.67354500  | -4.15549300 | -0.67227200 |
| H                  | 1.30797000  | -5.64426500 | 0.79189000  |
| C                  | 0.41475400  | -0.66750000 | -2.92857300 |
| N                  | 0.46615800  | -1.20798200 | -3.95125600 |
| TS6S <sub>CN</sub> |             |             |             |
| P                  | 1.08964100  | -0.19128600 | 0.46271300  |
| C                  | 2.88327600  | 0.10854700  | 0.61220500  |
| C                  | 0.35434100  | 0.47975500  | 2.00205900  |
| C                  | 3.73952700  | -0.72754100 | -0.34283500 |
| H                  | 3.02838200  | 1.18155500  | 0.43077000  |
| H                  | 3.16024500  | -0.07791100 | 1.65694100  |
| C                  | 0.84485400  | -1.99318300 | 0.39256200  |
| C                  | 0.48717800  | 0.57551100  | -1.05067300 |
| C                  | 0.95481200  | 1.80720000  | 2.48410400  |

---

|   |             |             |             |
|---|-------------|-------------|-------------|
| H | -0.71633500 | 0.58402000  | 1.80587000  |
| H | 0.46895200  | -0.28815400 | 2.77663200  |
| C | 5.19328300  | -0.25693600 | -0.35762000 |
| H | 3.32824000  | -0.67234000 | -1.35483000 |
| H | 3.70014300  | -1.78381500 | -0.04791200 |
| C | 1.41559900  | -2.76555700 | 1.58550100  |
| H | 1.29659200  | -2.31210700 | -0.55786100 |
| H | -0.23354100 | -2.16640400 | 0.31627900  |
| C | -0.65565100 | -0.21062900 | -1.75410500 |
| C | 0.09603100  | 2.43453600  | 3.58168800  |
| H | 1.97040300  | 1.64218300  | 2.86316700  |
| H | 1.03819700  | 2.51934200  | 1.65508500  |
| C | 6.05604200  | -1.10045300 | -1.29096800 |
| H | 5.60087500  | -0.28816700 | 0.66075000  |
| H | 5.22367600  | 0.79385500  | -0.67326700 |
| C | 1.30448500  | -4.27457400 | 1.36491700  |
| H | 2.46850700  | -2.50268900 | 1.74938400  |
| H | 0.87622700  | -2.49467600 | 2.50136300  |
| C | 0.66613000  | 3.76337300  | 4.06625800  |
| H | 0.00536200  | 1.73371900  | 4.42114400  |
| H | -0.91780300 | 2.58780600  | 3.18985600  |
| H | 6.06648900  | -2.14836300 | -0.97397000 |
| H | 5.66749100  | -1.06801200 | -2.31434500 |
| H | 7.09012800  | -0.74515600 | -1.31160200 |
| C | 1.82948100  | -5.07395100 | 2.55286300  |
| H | 1.85936800  | -4.54335700 | 0.45789900  |
| H | 0.25461800  | -4.53227400 | 1.17616300  |
| H | 0.73160500  | 4.47896100  | 3.23968300  |
| H | 1.67318300  | 3.63333600  | 4.47599000  |
| H | 0.04106100  | 4.20680200  | 4.84635600  |

---

|   |             |             |             |
|---|-------------|-------------|-------------|
| H | 1.26854900  | -4.83790900 | 3.46316200  |
| H | 1.74554300  | -6.14990200 | 2.37688900  |
| H | 2.88366400  | -4.84666000 | 2.74234000  |
| B | -2.01165000 | -0.52567600 | -0.99062000 |
| O | -3.17589100 | -0.85558200 | -1.61709800 |
| O | -2.10104900 | -0.55506300 | 0.37543200  |
| H | -0.22721400 | -1.18989900 | -2.03284000 |
| C | -4.20915200 | -0.90531700 | -0.59477900 |
| C | -5.19802900 | -2.00147800 | -0.94795200 |
| H | -5.93552200 | -2.11765200 | -0.14781400 |
| H | -5.72854800 | -1.73233800 | -1.86512800 |
| H | -4.69664200 | -2.95780300 | -1.10729000 |
| C | -4.89238700 | 0.45806800  | -0.60060300 |
| H | -5.72284100 | 0.48784900  | 0.10973700  |
| H | -4.18663300 | 1.25668800  | -0.35023800 |
| H | -5.28366700 | 0.65101800  | -1.60263700 |
| C | -3.37857100 | -1.16886300 | 0.70419500  |
| C | -3.10014700 | -2.64841800 | 0.94866800  |
| H | -2.36108000 | -2.74133000 | 1.75018600  |
| H | -4.00759000 | -3.17600200 | 1.25420800  |
| H | -2.70113600 | -3.13003600 | 0.04991600  |
| C | -3.92525600 | -0.50973900 | 1.95751200  |
| H | -3.96643200 | 0.57636900  | 1.85192200  |
| H | -4.93142700 | -0.88185300 | 2.17315500  |
| H | -3.28254900 | -0.75133900 | 2.80888900  |
| O | 1.76170300  | -2.18058000 | -2.72863200 |
| H | 1.95807500  | -1.20461800 | -2.95009000 |
| H | 1.32233100  | -2.53467300 | -3.51058500 |
| O | 2.09545800  | 0.32798100  | -3.07807600 |
| H | 1.42858100  | 0.48372200  | -1.96042800 |

---

|   |             |            |             |
|---|-------------|------------|-------------|
| H | 3.00389300  | 0.63675600 | -2.97212700 |
| C | 0.23212300  | 2.04539000 | -0.81835100 |
| C | 1.26103900  | 2.95593700 | -1.09405000 |
| C | -0.96911900 | 2.54495400 | -0.29327000 |
| C | 1.11604900  | 4.31327800 | -0.81365700 |
| H | 2.17834500  | 2.58227400 | -1.54140400 |
| C | -1.12187800 | 3.90233700 | -0.02279700 |
| H | -1.78396800 | 1.86282500 | -0.06343000 |
| C | -0.07478900 | 4.79035000 | -0.27024700 |
| H | 1.92997600  | 4.99915000 | -1.02872600 |
| H | -2.05778500 | 4.26716600 | 0.39027600  |
| H | -0.19225500 | 5.84726500 | -0.05184900 |
| C | -0.97196400 | 0.43396300 | -3.03179200 |
| N | -1.26967000 | 0.94386500 | -4.02703400 |

M8S<sub>CN</sub>

|   |             |             |             |
|---|-------------|-------------|-------------|
| P | 1.10167000  | -0.23951900 | 0.39703600  |
| C | 2.91633800  | -0.39832100 | 0.45001800  |
| C | 0.65052800  | 0.91350600  | 1.74039500  |
| C | 3.50869200  | -1.46493800 | -0.47265100 |
| H | 3.32786700  | 0.59118600  | 0.21771600  |
| H | 3.16817100  | -0.60828900 | 1.49775300  |
| C | 0.37611900  | -1.87423700 | 0.69205000  |
| C | 0.57854200  | 0.38447900  | -1.27182400 |
| C | 1.65527300  | 2.04268000  | 2.00361800  |
| H | -0.33553200 | 1.30894500  | 1.48252400  |
| H | 0.52092300  | 0.30117100  | 2.64130100  |
| C | 5.03086000  | -1.52217900 | -0.34891000 |
| H | 3.22911200  | -1.26459500 | -1.51258100 |
| H | 3.08373400  | -2.44680500 | -0.22762000 |
| C | 0.90405400  | -2.59827800 | 1.93230900  |

---

|   |             |             |             |
|---|-------------|-------------|-------------|
| H | 0.57912200  | -2.44623800 | -0.22064500 |
| H | -0.70552600 | -1.72113700 | 0.75935600  |
| C | -0.82942300 | -0.02507600 | -1.67220700 |
| C | 1.05506700  | 3.10178900  | 2.92718900  |
| H | 2.56742800  | 1.63446900  | 2.45487600  |
| H | 1.95264800  | 2.52472600  | 1.06494000  |
| C | 5.63898100  | -2.58372500 | -1.25985400 |
| H | 5.30242500  | -1.72549500 | 0.69445300  |
| H | 5.44822100  | -0.53775200 | -0.59433500 |
| C | 0.22364400  | -3.95782400 | 2.09733800  |
| H | 1.98905900  | -2.74180900 | 1.85229000  |
| H | 0.72762600  | -1.99372700 | 2.83087300  |
| C | 2.03017800  | 4.24199600  | 3.19983600  |
| H | 0.74755900  | 2.63368000  | 3.87067800  |
| H | 0.14359400  | 3.49724200  | 2.46094600  |
| H | 5.25383700  | -3.57859100 | -1.01285700 |
| H | 5.39683900  | -2.38348900 | -2.30863200 |
| H | 6.72805600  | -2.61359000 | -1.16649500 |
| C | 0.73753200  | -4.71794300 | 3.31536200  |
| H | 0.38598700  | -4.55053700 | 1.18877800  |
| H | -0.85999500 | -3.80716300 | 2.17925700  |
| H | 2.31938500  | 4.73414500  | 2.26506100  |
| H | 2.94275400  | 3.87341300  | 3.67970100  |
| H | 1.58818700  | 4.99774800  | 3.85499000  |
| H | 0.56197000  | -4.14981200 | 4.23475600  |
| H | 0.23916000  | -5.68558600 | 3.41933400  |
| H | 1.81408500  | -4.90169100 | 3.23708700  |
| B | -2.07978400 | 0.05915200  | -0.85541700 |
| O | -3.34362700 | -0.31136800 | -1.31269700 |
| O | -2.13078700 | 0.43788300  | 0.49256500  |

---

|   |             |             |             |
|---|-------------|-------------|-------------|
| H | -1.32701200 | -2.16048600 | -1.50421100 |
| C | -4.29414200 | 0.07152500  | -0.30322400 |
| C | -5.45123200 | -0.91398400 | -0.31145900 |
| H | -6.13733800 | -0.71000100 | 0.51695100  |
| H | -6.00858500 | -0.81624900 | -1.24742900 |
| H | -5.09644900 | -1.94347700 | -0.23132100 |
| C | -4.78866300 | 1.47551300  | -0.64599700 |
| H | -5.56861000 | 1.80834000  | 0.04488900  |
| H | -3.96565700 | 2.19696900  | -0.62079000 |
| H | -5.20230300 | 1.46493600  | -1.65790800 |
| C | -3.42587600 | 0.04492600  | 0.99317000  |
| C | -3.28515900 | -1.36361700 | 1.56897400  |
| H | -2.50376800 | -1.35519700 | 2.33613500  |
| H | -4.21613300 | -1.70437000 | 2.03089500  |
| H | -3.00173300 | -2.07816900 | 0.78772600  |
| C | -3.85362000 | 1.02230500  | 2.07438900  |
| H | -3.80587600 | 2.05332800  | 1.71796900  |
| H | -4.87582100 | 0.80931000  | 2.40291800  |
| H | -3.19093300 | 0.92710900  | 2.93998000  |
| O | -1.42463200 | -3.08722900 | -1.79668200 |
| H | 0.33896000  | -2.82453700 | -2.42987100 |
| H | -1.97663500 | -3.00076900 | -2.58700900 |
| O | 1.27432200  | -2.55196000 | -2.46116000 |
| H | 1.28655500  | -0.13772200 | -1.92905700 |
| H | 1.77224800  | -3.36542900 | -2.31193900 |
| C | 0.90369700  | 1.87192000  | -1.30299200 |
| C | 2.16981000  | 2.30354600  | -1.70918700 |
| C | -0.02461300 | 2.81983300  | -0.85990700 |
| C | 2.51354200  | 3.65354200  | -1.65271200 |
| H | 2.89004000  | 1.57343700  | -2.07317800 |

---

|   |             |             |             |
|---|-------------|-------------|-------------|
| C | 0.31960600  | 4.16714700  | -0.79506600 |
| H | -1.01490500 | 2.49169100  | -0.55463400 |
| C | 1.59171700  | 4.58788400  | -1.18568600 |
| H | 3.49896300  | 3.97407700  | -1.97679100 |
| H | -0.40697100 | 4.89235600  | -0.44083200 |
| H | 1.85693100  | 5.63947400  | -1.13730300 |
| C | -0.97672600 | -0.36202100 | -3.02857800 |
| N | -1.11976700 | -0.68561600 | -4.14567200 |

**M9S<sub>CN</sub>**

|   |             |             |             |
|---|-------------|-------------|-------------|
| P | -1.13063100 | 0.41850700  | 0.16110500  |
| C | -2.95124400 | 0.48858200  | 0.17067800  |
| C | -0.61990100 | -0.45337700 | 1.68077900  |
| C | -3.56301500 | 1.31994900  | -0.95978700 |
| H | -3.31165300 | -0.54618900 | 0.13353200  |
| H | -3.23930400 | 0.89210500  | 1.14974100  |
| C | -0.49138200 | 2.11721200  | 0.18373200  |
| C | -0.54942700 | -0.43994500 | -1.38666200 |
| C | -1.54228300 | -1.59500800 | 2.12486600  |
| H | 0.39668700  | -0.81013400 | 1.49176200  |
| H | -0.54971000 | 0.30973600  | 2.46581800  |
| C | -5.08717500 | 1.36995500  | -0.85273100 |
| H | -3.28492400 | 0.89692900  | -1.93277400 |
| H | -3.16348600 | 2.34170900  | -0.93530100 |
| C | -1.12783500 | 3.01730900  | 1.24561900  |
| H | -0.63439100 | 2.52121100  | -0.82528900 |
| H | 0.58807000  | 2.02468200  | 0.34104700  |
| C | 0.79802600  | 0.05010500  | -1.88270000 |
| C | -0.89306700 | -2.41882100 | 3.23618800  |
| H | -2.49799600 | -1.18874100 | 2.47721700  |
| H | -1.76909200 | -2.25948600 | 1.28281600  |



---

|   |             |             |             |
|---|-------------|-------------|-------------|
| C | -5.71600100 | 2.18734700  | -1.97632300 |
| H | -5.36468200 | 1.79600700  | 0.11923400  |
| H | -5.48142400 | 0.34649500  | -0.87012200 |
| C | -0.47723200 | 4.40083000  | 1.25820600  |
| H | -2.20313200 | 3.12373600  | 1.05508400  |
| H | -1.02585700 | 2.56143700  | 2.23879700  |
| C | -1.78313400 | -3.57175000 | 3.68766400  |
| H | -0.65893100 | -1.76663200 | 4.08689800  |
| H | 0.06357400  | -2.81117900 | 2.86816700  |
| H | -5.35097500 | 3.21938400  | -1.96118400 |
| H | -5.47078700 | 1.76142400  | -2.95451400 |
| H | -6.80530700 | 2.21514400  | -1.88575700 |
| C | -1.10071000 | 5.32169800  | 2.30183200  |
| H | -0.56994500 | 4.84856300  | 0.26147500  |
| H | 0.59676200  | 4.28940200  | 1.45192300  |
| H | -1.99683400 | -4.24470300 | 2.85035000  |
| H | -2.73962900 | -3.20320900 | 4.07272900  |
| H | -1.30677300 | -4.15861900 | 4.47782900  |
| H | -0.99645700 | 4.90176200  | 3.30764700  |
| H | -0.62409100 | 6.30572500  | 2.29856900  |
| H | -2.16881500 | 5.46585100  | 2.10910700  |
| B | 2.04843400  | 0.19104300  | -1.07926300 |
| O | 3.28152000  | 0.63278100  | -1.55830200 |
| O | 2.12846900  | -0.08866200 | 0.29522600  |
| C | 4.25977800  | 0.35099400  | -0.54327100 |
| C | 5.36242400  | 1.39497800  | -0.60916600 |
| H | 6.07010700  | 1.26065900  | 0.21534400  |
| H | 5.91098600  | 1.28888600  | -1.54943600 |
| H | 4.95597600  | 2.40728500  | -0.56389200 |
| C | 4.82838000  | -1.03846000 | -0.82796400 |

---

|                    |             |             |             |
|--------------------|-------------|-------------|-------------|
| H                  | 5.63060700  | -1.29842300 | -0.13131800 |
| H                  | 4.04575000  | -1.80139700 | -0.76321500 |
| H                  | 5.23247800  | -1.05064600 | -1.84372500 |
| C                  | 3.40467600  | 0.38828900  | 0.76214300  |
| C                  | 3.20169300  | 1.80834700  | 1.28826900  |
| H                  | 2.42139500  | 1.79246800  | 2.05649000  |
| H                  | 4.11674100  | 2.20670700  | 1.73603600  |
| H                  | 2.88643300  | 2.48069100  | 0.48351800  |
| C                  | 3.89315600  | -0.52344900 | 1.87576000  |
| H                  | 3.88905100  | -1.56938900 | 1.56188100  |
| H                  | 4.90847100  | -0.25056500 | 2.18082900  |
| H                  | 3.23825800  | -0.42421000 | 2.74701100  |
| H                  | -1.31722800 | -0.13384600 | -2.10897300 |
| C                  | -0.73082400 | -1.93413500 | -1.15194000 |
| C                  | -1.95271500 | -2.54382600 | -1.45351000 |
| C                  | 0.28257400  | -2.70140500 | -0.56833100 |
| C                  | -2.17037200 | -3.88856900 | -1.15741400 |
| H                  | -2.73945000 | -1.95844500 | -1.92557900 |
| C                  | 0.06295500  | -4.04213300 | -0.26332200 |
| H                  | 1.23705000  | -2.23564400 | -0.33936900 |
| C                  | -1.16531300 | -4.63888200 | -0.55114500 |
| H                  | -3.12251500 | -4.34883900 | -1.40309500 |
| H                  | 0.85400300  | -4.62524500 | 0.19880600  |
| H                  | -1.33219400 | -5.68525700 | -0.31498800 |
| C                  | 0.83951500  | 0.38289000  | -3.24243600 |
| N                  | 0.86446800  | 0.66781000  | -4.38013900 |
| TS7S <sub>CN</sub> |             |             |             |
| P                  | 1.52771800  | -0.19507000 | -0.04143400 |
| C                  | 3.29274700  | -0.01234700 | 0.47188500  |
| C                  | 0.54666700  | 0.41095000  | 1.39258400  |

---

|   |             |             |             |
|---|-------------|-------------|-------------|
| C | 4.25798000  | -0.64798400 | -0.52993400 |
| H | 3.48863600  | 1.06374300  | 0.55383800  |
| H | 3.42493800  | -0.44499200 | 1.47282800  |
| C | 1.21893800  | -2.01060700 | -0.07873800 |
| C | 0.22554900  | 0.65314200  | -1.84911300 |
| C | 0.98685900  | 1.78150200  | 1.91985400  |
| H | -0.48767600 | 0.47041200  | 1.02972700  |
| H | 0.56544400  | -0.33102500 | 2.19993200  |
| C | 5.72013900  | -0.45191800 | -0.13079500 |
| H | 4.09058300  | -0.21686000 | -1.52637400 |
| H | 4.05009500  | -1.72265200 | -0.61833600 |
| C | 1.74787400  | -2.81120200 | 1.11284200  |
| H | 1.64368300  | -2.39364300 | -1.01470200 |
| H | 0.13090500  | -2.12943900 | -0.16534300 |
| C | -0.88791100 | -0.21238700 | -1.91505000 |
| C | -0.07849600 | 2.40473200  | 2.82107000  |
| H | 1.92795300  | 1.68182200  | 2.47552300  |
| H | 1.18506400  | 2.46841900  | 1.08704800  |
| C | 6.68493100  | -1.08563400 | -1.12811200 |
| H | 5.87965700  | -0.88252800 | 0.86569700  |
| H | 5.92731900  | 0.62179200  | -0.04283700 |
| C | 1.34142600  | -4.28337600 | 1.03656300  |
| H | 2.84296700  | -2.74094800 | 1.15039800  |
| H | 1.37544900  | -2.38434300 | 2.05278600  |
| C | 0.33042600  | 3.78057600  | 3.33601500  |
| H | -0.28291500 | 1.73214500  | 3.66433300  |
| H | -1.01353900 | 2.48479600  | 2.25013200  |
| H | 6.51069500  | -2.16350300 | -1.21012500 |
| H | 6.55778800  | -0.65157200 | -2.12526500 |
| H | 7.72586700  | -0.93635000 | -0.82783000 |

---

|   |             |             |             |
|---|-------------|-------------|-------------|
| C | 1.88674700  | -5.09798800 | 2.20543600  |
| H | 1.69853000  | -4.70590000 | 0.08937000  |
| H | 0.24658900  | -4.35142900 | 1.01341200  |
| H | 0.50960600  | 4.46594400  | 2.50025100  |
| H | 1.25313900  | 3.72248400  | 3.92299200  |
| H | -0.44425600 | 4.21941200  | 3.97126800  |
| H | 1.52329800  | -4.70469500 | 3.16068600  |
| H | 1.58314700  | -6.14647700 | 2.13799300  |
| H | 2.98112900  | -5.06693300 | 2.22764600  |
| B | -2.14442400 | -0.38029500 | -1.04093900 |
| O | -2.97139500 | -1.46973400 | -1.22437600 |
| O | -2.57817600 | 0.41756400  | 0.00306600  |
| C | -4.14162700 | -1.27188400 | -0.40252700 |
| C | -4.63117000 | -2.62184200 | 0.09318400  |
| H | -5.45537300 | -2.49269200 | 0.80181400  |
| H | -4.99683300 | -3.21135000 | -0.75204900 |
| H | -3.83057600 | -3.18143700 | 0.58082000  |
| C | -5.20013100 | -0.60729000 | -1.27891400 |
| H | -6.14407100 | -0.48368600 | -0.74082200 |
| H | -4.86234500 | 0.37397700  | -1.62637600 |
| H | -5.37909900 | -1.23796500 | -2.15366700 |
| C | -3.59950200 | -0.32438600 | 0.71222400  |
| C | -2.90131100 | -1.07745400 | 1.84244300  |
| H | -2.38842700 | -0.35734800 | 2.48660800  |
| H | -3.61967900 | -1.63391300 | 2.45071400  |
| H | -2.15794100 | -1.77961600 | 1.44903300  |
| C | -4.61574400 | 0.65382500  | 1.27450800  |
| H | -5.01315400 | 1.30829600  | 0.49648500  |
| H | -5.44618200 | 0.11406600  | 1.74022600  |
| H | -4.14145900 | 1.27577000  | 2.03918300  |

---

|                                              |             |             |             |
|----------------------------------------------|-------------|-------------|-------------|
| H                                            | 0.99188500  | 0.45660300  | -2.59704600 |
| C                                            | 0.24180100  | 2.08467300  | -1.43382800 |
| C                                            | 1.43172000  | 2.80228200  | -1.63850900 |
| C                                            | -0.85074400 | 2.74562400  | -0.86859800 |
| C                                            | 1.53980700  | 4.13311300  | -1.25996600 |
| H                                            | 2.28337400  | 2.29352300  | -2.08615400 |
| C                                            | -0.73823300 | 4.08103800  | -0.47690100 |
| H                                            | -1.78729600 | 2.22317500  | -0.72235800 |
| C                                            | 0.45261700  | 4.77666600  | -0.66327700 |
| H                                            | 2.46871400  | 4.66964800  | -1.42621000 |
| H                                            | -1.59254700 | 4.57792200  | -0.02660200 |
| H                                            | 0.53342700  | 5.81506700  | -0.35683500 |
| C                                            | -0.68943200 | -1.30671100 | -2.80745000 |
| N                                            | -0.51216600 | -2.19335900 | -3.54235600 |
| <i>(E)</i> - $\alpha$ -product <sub>CN</sub> |             |             |             |
| C                                            | -1.71776300 | 1.73018300  | 0.00238100  |
| C                                            | -0.36777400 | 1.82083200  | -0.04374100 |
| B                                            | 0.71477600  | 0.68113900  | -0.01406000 |
| O                                            | 2.00162200  | 0.94194200  | -0.38904500 |
| O                                            | 0.51803600  | -0.58920300 | 0.44132700  |
| C                                            | 2.69965500  | -0.33268300 | -0.39377300 |
| C                                            | 4.13537900  | -0.10857100 | 0.04525300  |
| H                                            | 4.65603800  | -1.06661600 | 0.13830800  |
| H                                            | 4.65706800  | 0.49271100  | -0.70414700 |
| H                                            | 4.18425600  | 0.41418600  | 1.00207200  |
| C                                            | 2.65025800  | -0.85185100 | -1.82716800 |
| H                                            | 3.20907500  | -1.78601700 | -1.92848900 |
| H                                            | 1.61863600  | -1.02409900 | -2.15007400 |
| H                                            | 3.09746000  | -0.10559000 | -2.48878300 |
| C                                            | 1.83689900  | -1.18300900 | 0.59424400  |

---

|                      |             |             |             |
|----------------------|-------------|-------------|-------------|
| C                    | 2.23668600  | -0.98893300 | 2.05332700  |
| H                    | 1.47436100  | -1.44328600 | 2.69140200  |
| H                    | 3.19713400  | -1.46598300 | 2.26596100  |
| H                    | 2.30925100  | 0.07340700  | 2.30543000  |
| C                    | 1.74870200  | -2.66001400 | 0.25458400  |
| H                    | 1.30806500  | -2.81797300 | -0.73168300 |
| H                    | 2.74488900  | -3.11262800 | 0.27339300  |
| H                    | 1.12734900  | -3.16901500 | 0.99632100  |
| H                    | -2.28491400 | 2.65482000  | 0.10744900  |
| C                    | -2.53863000 | 0.51770200  | -0.07563800 |
| C                    | -3.78080300 | 0.51422400  | 0.57594700  |
| C                    | -2.15638200 | -0.60785900 | -0.81797600 |
| C                    | -4.59832700 | -0.60934900 | 0.53274000  |
| H                    | -4.09377800 | 1.39659400  | 1.12751000  |
| C                    | -2.98166500 | -1.72470100 | -0.87234900 |
| H                    | -1.22226200 | -0.59647800 | -1.36887800 |
| C                    | -4.19827800 | -1.73204200 | -0.19030700 |
| H                    | -5.55046500 | -0.60584900 | 1.05332800  |
| H                    | -2.68026800 | -2.58875400 | -1.45586800 |
| H                    | -4.84007200 | -2.60638400 | -0.23485600 |
| C                    | 0.17923200  | 3.15213800  | -0.02805500 |
| N                    | 0.63913000  | 4.21613500  | -0.01473700 |
| STS1 <sub>CN-1</sub> |             |             |             |
| C                    | -2.63380900 | -1.98543800 | 0.13871600  |
| C                    | -4.01919500 | -2.23245400 | -0.11298100 |
| C                    | -4.84010400 | -1.18126400 | -0.55085500 |
| C                    | -4.55870400 | -3.51229600 | 0.08451800  |
| C                    | -6.19019800 | -1.41267600 | -0.78307000 |
| H                    | -4.41077500 | -0.19615800 | -0.70422000 |
| C                    | -5.91053100 | -3.73101400 | -0.15107800 |

---

|   |             |             |             |
|---|-------------|-------------|-------------|
| H | -3.91535600 | -4.31798000 | 0.42197800  |
| C | -6.72561700 | -2.68490400 | -0.58295300 |
| H | -6.82482000 | -0.59926000 | -1.11980100 |
| H | -6.32944900 | -4.71999100 | 0.00234000  |
| H | -7.78084000 | -2.86200600 | -0.76486100 |
| C | -1.46397700 | -1.75321400 | 0.35805100  |
| P | -0.30263900 | 1.01340000  | 0.69766700  |
| C | -0.20293600 | 1.53946700  | -1.07255300 |
| C | -0.41386200 | 3.02468400  | -1.37736900 |
| H | -0.94142600 | 0.94019300  | -1.61993700 |
| H | 0.78097300  | 1.20636300  | -1.42752500 |
| C | -0.16236000 | 3.34422100  | -2.85120500 |
| H | -1.44104200 | 3.31088800  | -1.11620900 |
| H | 0.24677900  | 3.64087800  | -0.75623800 |
| C | -0.41475900 | 4.81274900  | -3.17835200 |
| H | 0.87265800  | 3.07981500  | -3.10209200 |
| H | -0.80494400 | 2.70841100  | -3.47311800 |
| H | -0.22220600 | 5.02664900  | -4.23343900 |
| H | -1.45255000 | 5.08866200  | -2.96412300 |
| H | 0.23248700  | 5.46323800  | -2.58084700 |
| C | 1.30702100  | 1.40742200  | 1.48179400  |
| C | 2.09633700  | 2.62571200  | 1.00044700  |
| H | 1.92413600  | 0.50763800  | 1.34206700  |
| H | 1.10630200  | 1.47862400  | 2.55853100  |
| C | 3.47698700  | 2.67072100  | 1.65702500  |
| H | 2.22343200  | 2.57815000  | -0.08972500 |
| H | 1.54990300  | 3.55366700  | 1.21255500  |
| C | 4.36641400  | 3.76762800  | 1.08157900  |
| H | 3.35743700  | 2.81199600  | 2.73840000  |
| H | 3.95512100  | 1.69093200  | 1.52581800  |

---

|   |             |             |             |
|---|-------------|-------------|-------------|
| H | 5.34212600  | 3.79282600  | 1.57518300  |
| H | 4.53649700  | 3.60851100  | 0.01105500  |
| H | 3.90456800  | 4.75342800  | 1.20186200  |
| C | -1.56288900 | 2.12454800  | 1.45811100  |
| C | -2.97004400 | 1.78805800  | 0.95715300  |
| H | -1.31096900 | 3.17271100  | 1.25348000  |
| H | -1.50230100 | 1.97825300  | 2.54251700  |
| C | -4.03968700 | 2.72892700  | 1.50759000  |
| H | -2.99355900 | 1.82422000  | -0.14181200 |
| H | -3.21403500 | 0.75460500  | 1.23745500  |
| C | -5.43861400 | 2.35071200  | 1.02966300  |
| H | -4.00401600 | 2.71206900  | 2.60384800  |
| H | -3.80585100 | 3.75682600  | 1.20306400  |
| H | -6.19600000 | 3.03341500  | 1.42509600  |
| H | -5.50024500 | 2.38067800  | -0.06398000 |
| H | -5.70019100 | 1.33675400  | 1.35102200  |
| C | -0.12925200 | -1.42673300 | 0.61431400  |
| N | 0.99056400  | -1.76343300 | 0.74875400  |
| B | 2.51823800  | -2.28303000 | 1.06597800  |
| O | 2.86156000  | -3.17634000 | -0.01530700 |
| O | 3.45512800  | -1.18472400 | 1.03574600  |
| H | 2.36973600  | -2.76470100 | 2.17535600  |
| C | 4.09345900  | -2.73120500 | -0.57501500 |
| C | 4.11190200  | -3.05191000 | -2.06345500 |
| H | 5.00235800  | -2.63277500 | -2.54447400 |
| H | 4.12866400  | -4.13679000 | -2.20678600 |
| H | 3.22389900  | -2.65812400 | -2.56286100 |
| C | 5.23448300  | -3.46835300 | 0.13143400  |
| H | 6.20973400  | -3.23880400 | -0.30933800 |
| H | 5.25934500  | -3.20873900 | 1.19423300  |



---

|   |            |             |             |
|---|------------|-------------|-------------|
| H | 5.06198900 | -4.54517500 | 0.04576600  |
| C | 4.09131300 | -1.20687200 | -0.24092400 |
| C | 3.24953900 | -0.39756000 | -1.23207500 |
| H | 3.11310000 | 0.61219300  | -0.82810800 |
| H | 3.73840200 | -0.31162300 | -2.20772400 |
| H | 2.26393500 | -0.85193700 | -1.37613300 |
| C | 5.47560800 | -0.58458100 | -0.12050100 |
| H | 6.03256200 | -1.02319600 | 0.71014200  |
| H | 6.04809900 | -0.72744800 | -1.04349300 |
| H | 5.38812200 | 0.49254700  | 0.05733700  |

STS1<sub>CN</sub>-2

|   |             |             |             |
|---|-------------|-------------|-------------|
| C | -2.84251000 | -1.95441600 | -0.01662700 |
| C | -4.24384400 | -1.94284300 | 0.25621400  |
| C | -4.82315800 | -0.79483300 | 0.81899300  |
| C | -5.03936500 | -3.05465500 | -0.05797400 |
| C | -6.19102300 | -0.76169400 | 1.05852000  |
| H | -4.19363100 | 0.05616800  | 1.06086500  |
| C | -6.40587000 | -3.00975400 | 0.18847700  |
| H | -4.58054100 | -3.93571600 | -0.49407800 |
| C | -6.98151300 | -1.86706000 | 0.74356000  |
| H | -6.64027000 | 0.12637600  | 1.49124700  |
| H | -7.02357800 | -3.86779600 | -0.05518100 |
| H | -8.04999300 | -1.83819900 | 0.93224100  |
| C | -1.65582600 | -1.92588700 | -0.26739700 |
| P | -0.09698700 | 0.67805100  | -0.02572900 |
| C | 0.86825300  | 1.75268100  | -1.18869800 |
| C | 0.68942000  | 3.26835300  | -1.07183200 |
| H | 0.60637000  | 1.43012000  | -2.20379400 |
| H | 1.91366900  | 1.45613400  | -1.04188100 |
| C | 1.62155300  | 4.02264800  | -2.02070800 |

---

|   |             |             |             |
|---|-------------|-------------|-------------|
| H | -0.34952300 | 3.54015200  | -1.30095100 |
| H | 0.87592900  | 3.60085900  | -0.04405500 |
| C | 1.43101800  | 5.53436700  | -1.94377000 |
| H | 2.66114300  | 3.76552400  | -1.78112200 |
| H | 1.44561200  | 3.67768900  | -3.04737300 |
| H | 2.10454100  | 6.05911400  | -2.62752300 |
| H | 0.40464400  | 5.81312300  | -2.20518800 |
| H | 1.62778200  | 5.90328700  | -0.93155500 |
| C | 0.82366500  | 0.67346100  | 1.57473900  |
| C | 1.40150600  | 1.98945000  | 2.09409600  |
| H | 1.62716000  | -0.05568400 | 1.43009600  |
| H | 0.12980500  | 0.24418800  | 2.31007500  |
| C | 2.08128900  | 1.81450100  | 3.45293300  |
| H | 2.13627800  | 2.37489000  | 1.37477200  |
| H | 0.61276800  | 2.74909200  | 2.17689400  |
| C | 2.70657600  | 3.10813000  | 3.96505200  |
| H | 1.34617000  | 1.44320200  | 4.17799700  |
| H | 2.85213000  | 1.03760400  | 3.36752800  |
| H | 3.18830700  | 2.96415300  | 4.93647200  |
| H | 3.46445500  | 3.47930600  | 3.26711700  |
| H | 1.94989400  | 3.89141600  | 4.08015400  |
| C | -1.62680900 | 1.64161100  | 0.36189100  |
| C | -2.61079400 | 1.68895500  | -0.80954900 |
| H | -1.36196800 | 2.65736600  | 0.68264700  |
| H | -2.09567300 | 1.14943400  | 1.22484100  |
| C | -3.81732600 | 2.58084700  | -0.51894500 |
| H | -2.10507500 | 2.05210200  | -1.71474900 |
| H | -2.95346900 | 0.67063800  | -1.03737700 |
| C | -4.87440900 | 2.50887100  | -1.61613300 |
| H | -4.26250100 | 2.28724800  | 0.44105300  |

---

|                       |             |             |             |
|-----------------------|-------------|-------------|-------------|
| H                     | -3.47422100 | 3.61579300  | -0.39339500 |
| H                     | -5.72000700 | 3.16947300  | -1.40381500 |
| H                     | -4.45552800 | 2.80145500  | -2.58479000 |
| H                     | -5.26176300 | 1.48891300  | -1.71503800 |
| C                     | -0.31132700 | -1.83746100 | -0.60004300 |
| N                     | 0.71460400  | -2.28150400 | -0.96974200 |
| B                     | 2.22119700  | -1.83993300 | -1.55891100 |
| O                     | 2.69945900  | -0.82400900 | -0.64549600 |
| O                     | 3.12906200  | -2.94182200 | -1.51016200 |
| H                     | 1.90914600  | -1.48527200 | -2.68065500 |
| C                     | 4.00614400  | -1.22187200 | -0.21917700 |
| C                     | 4.26600400  | -0.70565100 | 1.18883200  |
| H                     | 5.25882800  | -1.01221500 | 1.53582800  |
| H                     | 4.23116900  | 0.38977300  | 1.19089500  |
| H                     | 3.52353600  | -1.07362000 | 1.90052200  |
| C                     | 5.02262100  | -0.61289800 | -1.18790200 |
| H                     | 6.05347400  | -0.81682300 | -0.88240400 |
| H                     | 4.87292700  | -1.00479300 | -2.19855900 |
| H                     | 4.88052800  | 0.47174900  | -1.21557900 |
| C                     | 3.93644200  | -2.77507500 | -0.34521400 |
| C                     | 3.22409000  | -3.41615400 | 0.84891500  |
| H                     | 2.96819700  | -4.44840800 | 0.59232300  |
| H                     | 3.85609900  | -3.42866900 | 1.74268000  |
| H                     | 2.29789400  | -2.88332300 | 1.08689400  |
| C                     | 5.27919800  | -3.45273900 | -0.57647100 |
| H                     | 5.72606600  | -3.12422400 | -1.51734000 |
| H                     | 5.97422000  | -3.23313500 | 0.24095600  |
| H                     | 5.14340300  | -4.53766700 | -0.62440600 |
| STS2 <sub>CN</sub> -1 |             |             |             |
| C                     | 1.69911000  | -2.20998000 | -0.95539100 |

---

|   |             |             |             |
|---|-------------|-------------|-------------|
| C | 2.99881200  | -2.35771100 | -0.39254700 |
| C | 4.15681400  | -2.24166800 | -1.18996900 |
| C | 3.15526000  | -2.63598600 | 0.98217300  |
| C | 5.41798500  | -2.35526700 | -0.61881900 |
| H | 4.05253500  | -2.04945900 | -2.25365700 |
| C | 4.42408500  | -2.74572700 | 1.53859900  |
| H | 2.27202900  | -2.75681800 | 1.60235100  |
| C | 5.56421000  | -2.60096700 | 0.74781200  |
| H | 6.29690700  | -2.24911300 | -1.24831800 |
| H | 4.52148800  | -2.94909500 | 2.60088600  |
| H | 6.55260600  | -2.68771600 | 1.18692700  |
| C | 0.72030600  | -1.46507700 | -1.25901400 |
| P | 0.95898800  | 0.68172600  | -0.70058700 |
| C | 0.05474000  | 2.27021000  | -0.98520000 |
| C | 0.58094500  | 3.46891000  | -0.19199600 |
| H | -1.00129900 | 2.08535400  | -0.75406700 |
| H | 0.11190800  | 2.46342800  | -2.06307400 |
| C | -0.16090900 | 4.75928400  | -0.54445800 |
| H | 0.47722200  | 3.27657800  | 0.88348100  |
| H | 1.65383300  | 3.60205800  | -0.38650600 |
| C | 0.34772800  | 5.95646000  | 0.25272300  |
| H | -0.05270200 | 4.95385900  | -1.61846500 |
| H | -1.23294900 | 4.61700800  | -0.35959900 |
| H | -0.19154100 | 6.87041000  | -0.01174400 |
| H | 0.22277900  | 5.79242600  | 1.32805300  |
| H | 1.41235400  | 6.12877000  | 0.06348200  |
| C | 2.69586700  | 1.00192900  | -1.25266200 |
| C | 3.76071900  | 1.12004400  | -0.16004300 |
| H | 2.66737300  | 1.91622900  | -1.85783000 |
| H | 2.95583200  | 0.18158000  | -1.92942200 |

---

|   |             |             |             |
|---|-------------|-------------|-------------|
| C | 5.15152900  | 1.33939200  | -0.75405800 |
| H | 3.51796600  | 1.94930300  | 0.51673500  |
| H | 3.77298700  | 0.20538500  | 0.44814400  |
| C | 6.23788600  | 1.37074800  | 0.31578800  |
| H | 5.36164100  | 0.53461500  | -1.46997500 |
| H | 5.15867600  | 2.27615000  | -1.32575300 |
| H | 7.22675200  | 1.53628100  | -0.12138600 |
| H | 6.05324600  | 2.17039600  | 1.04094500  |
| H | 6.26531200  | 0.42247300  | 0.86351000  |
| C | 0.98315100  | 0.48073900  | 1.12438200  |
| C | -0.43612600 | 0.35365600  | 1.68441700  |
| H | 1.51643400  | 1.31331200  | 1.59611500  |
| H | 1.55834800  | -0.42991500 | 1.32547100  |
| C | -0.44688200 | -0.10965100 | 3.14039600  |
| H | -0.94819000 | 1.32271400  | 1.60591100  |
| H | -1.02486000 | -0.35377300 | 1.08316400  |
| C | -1.86444100 | -0.21693600 | 3.69444000  |
| H | 0.04937600  | -1.08619600 | 3.20303000  |
| H | 0.14730900  | 0.58216400  | 3.75060300  |
| H | -1.87045000 | -0.62136400 | 4.71077900  |
| H | -2.34866900 | 0.76557400  | 3.72365600  |
| H | -2.47158100 | -0.87139000 | 3.05944100  |
| C | -0.56175300 | -1.64494000 | -1.82031600 |
| N | -1.62458700 | -1.76506400 | -2.27112300 |
| B | -3.75747700 | -2.32116200 | -0.28716600 |
| O | -3.42649500 | -1.30167100 | 0.56595300  |
| O | -4.85297800 | -2.05467700 | -1.05655900 |
| H | -3.18323300 | -3.35911800 | -0.31235500 |
| C | -4.51363000 | -0.34159200 | 0.51591000  |
| C | -3.94285900 | 1.06002800  | 0.64272000  |

---

|   |             |             |             |
|---|-------------|-------------|-------------|
| H | -4.73154500 | 1.80601800  | 0.50132700  |
| H | -3.52073900 | 1.19443200  | 1.64274600  |
| H | -3.15473100 | 1.23562700  | -0.09308200 |
| C | -5.42831900 | -0.65163300 | 1.69757800  |
| H | -6.25633700 | 0.06014200  | 1.75594800  |
| H | -5.83951300 | -1.66279500 | 1.62202200  |
| H | -4.84842600 | -0.58370000 | 2.62231400  |
| C | -5.17506100 | -0.65319000 | -0.86744600 |
| C | -4.53410500 | 0.11294500  | -2.02091700 |
| H | -4.89680800 | -0.30398800 | -2.96437500 |
| H | -4.79947200 | 1.17336000  | -1.98492700 |
| H | -3.44543000 | 0.01556300  | -2.00325200 |
| C | -6.68538100 | -0.49079100 | -0.89999200 |
| H | -7.17580100 | -1.15425800 | -0.18523400 |
| H | -6.96250700 | 0.54291400  | -0.67034100 |
| H | -7.05574300 | -0.72864500 | -1.90099500 |

STS2<sub>CN-2</sub>

|   |             |             |             |
|---|-------------|-------------|-------------|
| C | -0.50354600 | -1.72228300 | -1.69337700 |
| C | -1.38746300 | -2.61204400 | -1.01926100 |
| C | -0.91736100 | -3.46037200 | 0.00525100  |
| C | -2.75449500 | -2.66779800 | -1.36380200 |
| C | -1.79504000 | -4.29623900 | 0.68390700  |
| H | 0.13656900  | -3.44158900 | 0.26860100  |
| C | -3.61977100 | -3.51096000 | -0.67654200 |
| H | -3.12475900 | -2.03742800 | -2.16697800 |
| C | -3.15163100 | -4.32583600 | 0.35433100  |
| H | -1.41586100 | -4.93053100 | 1.48020800  |
| H | -4.67038200 | -3.53068800 | -0.95040400 |
| H | -3.83161400 | -4.98103000 | 0.88877800  |
| C | 0.04012100  | -0.58630100 | -1.80101100 |

---

|   |             |             |             |
|---|-------------|-------------|-------------|
| P | -0.56513800 | 0.89863700  | -0.21671500 |
| C | -0.10567800 | 2.59399500  | 0.37228500  |
| C | -1.03471200 | 3.19111900  | 1.43175900  |
| H | -0.04816000 | 3.24795100  | -0.50564600 |
| H | 0.91368300  | 2.49493100  | 0.76270800  |
| C | -0.51602700 | 4.52932600  | 1.96098200  |
| H | -2.03662300 | 3.33694600  | 1.00833700  |
| H | -1.14557600 | 2.48914900  | 2.26969400  |
| C | -1.44716700 | 5.14068100  | 3.00353200  |
| H | 0.48144800  | 4.38222800  | 2.39295300  |
| H | -0.39209000 | 5.22296600  | 1.12021500  |
| H | -1.06206600 | 6.09531200  | 3.37302100  |
| H | -2.44169600 | 5.32084900  | 2.58234700  |
| H | -1.56565600 | 4.47189000  | 3.86246200  |
| C | -0.39244000 | -0.17846500 | 1.27730800  |
| C | -1.67553200 | -0.64403900 | 1.96679400  |
| H | 0.24809000  | 0.36746900  | 1.98063200  |
| H | 0.17928700  | -1.04937000 | 0.94333600  |
| C | -1.37017500 | -1.55751400 | 3.15360800  |
| H | -2.26135500 | 0.21780700  | 2.31135700  |
| H | -2.30559800 | -1.19044800 | 1.25182900  |
| C | -2.63549800 | -2.12233900 | 3.79064700  |
| H | -0.73073300 | -2.38162100 | 2.81058600  |
| H | -0.78821800 | -1.00150900 | 3.89980300  |
| H | -2.40327000 | -2.76616700 | 4.64389400  |
| H | -3.28978100 | -1.31863300 | 4.14475200  |
| H | -3.19965400 | -2.71593600 | 3.06299500  |
| C | -2.36638000 | 1.00299200  | -0.57434700 |
| C | -2.65829600 | 1.91529800  | -1.76684800 |
| H | -2.90924700 | 1.34145700  | 0.31560300  |

---

|   |             |             |             |
|---|-------------|-------------|-------------|
| H | -2.70176300 | -0.01826300 | -0.78714400 |
| C | -4.14395300 | 1.94189000  | -2.12402900 |
| H | -2.32083000 | 2.93713600  | -1.54624700 |
| H | -2.08074300 | 1.57734800  | -2.63804400 |
| C | -4.44103900 | 2.85188000  | -3.31166700 |
| H | -4.47616800 | 0.91981800  | -2.34594300 |
| H | -4.71773700 | 2.27214900  | -1.24905600 |
| H | -5.50726300 | 2.85704200  | -3.55505400 |
| H | -4.14059300 | 3.88318400  | -3.09918100 |
| H | -3.89503700 | 2.52330300  | -4.20201200 |
| C | 0.96473500  | 0.04560500  | -2.65705400 |
| N | 1.73564200  | 0.58942100  | -3.33392800 |
| B | 3.13435300  | 1.38452600  | -0.70565800 |
| O | 2.49257000  | 0.47365900  | 0.09333300  |
| O | 4.42957100  | 1.05687000  | -0.97503600 |
| H | 2.62090200  | 2.38429800  | -1.08889900 |
| C | 3.50624100  | -0.45033600 | 0.57546900  |
| C | 2.91235700  | -1.84604100 | 0.66637500  |
| H | 3.70039900  | -2.57912600 | 0.86610700  |
| H | 2.19341200  | -1.89120700 | 1.48970700  |
| H | 2.40222700  | -2.11862900 | -0.26097700 |
| C | 3.92314800  | 0.04560400  | 1.95657700  |
| H | 4.64622400  | -0.63139800 | 2.41957400  |
| H | 4.36382300  | 1.04553900  | 1.90064400  |
| H | 3.03705900  | 0.09472900  | 2.59561500  |
| C | 4.63475200  | -0.29851700 | -0.49734100 |
| C | 4.44869800  | -1.22411800 | -1.69577200 |
| H | 5.14019000  | -0.91963400 | -2.48583600 |
| H | 4.66117500  | -2.26301800 | -1.42929200 |
| H | 3.43117700  | -1.16188300 | -2.09111500 |



---

|                      |             |             |             |
|----------------------|-------------|-------------|-------------|
| C                    | 6.04743100  | -0.41708200 | 0.04850500  |
| H                    | 6.25368400  | 0.34713100  | 0.80009500  |
| H                    | 6.19956700  | -1.40380100 | 0.49695400  |
| H                    | 6.76454700  | -0.29971400 | -0.76852200 |
| STS3 <sub>CN-1</sub> |             |             |             |
| P                    | -1.73741800 | -0.41008700 | -0.99231500 |
| C                    | -2.87098500 | -1.87669500 | -0.96616200 |
| C                    | -0.94700900 | -0.55010200 | -2.65350900 |
| C                    | -3.53766100 | -2.09451000 | 0.39294700  |
| H                    | -3.63238400 | -1.69181700 | -1.73431200 |
| H                    | -2.31923300 | -2.77508300 | -1.27362100 |
| C                    | -0.52417600 | -0.77935700 | 0.35265200  |
| C                    | -0.62748000 | 2.40379000  | -1.02787200 |
| C                    | 0.13857100  | -1.60949300 | -2.87966800 |
| H                    | -1.80041700 | -0.72528200 | -3.31997100 |
| H                    | -0.55639300 | 0.44063200  | -2.91367700 |
| C                    | -4.54162100 | -3.24677000 | 0.36952600  |
| H                    | -4.04693000 | -1.17347200 | 0.70837600  |
| H                    | -2.77420000 | -2.30054400 | 1.15488200  |
| C                    | 0.06360400  | -2.18877000 | 0.47865200  |
| H                    | -1.07951500 | -0.53652300 | 1.26982600  |
| H                    | 0.27952800  | -0.03681700 | 0.28917600  |
| C                    | -1.74422600 | 1.96874600  | -0.67094000 |
| C                    | 1.54236600  | -1.11141200 | -2.53508100 |
| H                    | -0.08873900 | -2.52340800 | -2.31552100 |
| H                    | 0.12986100  | -1.89821300 | -3.93821500 |
| C                    | -5.20664700 | -3.46607600 | 1.72481800  |
| H                    | -4.02704400 | -4.16347400 | 0.05508900  |
| H                    | -5.30562300 | -3.04262300 | -0.39096000 |
| C                    | 0.65561200  | -2.42528000 | 1.86883400  |

---

|   |             |             |             |
|---|-------------|-------------|-------------|
| H | -0.70056600 | -2.95254900 | 0.28224900  |
| H | 0.85057800  | -2.33617000 | -0.27049500 |
| C | -3.00080900 | 2.35078300  | -0.03735000 |
| C | 2.59539800  | -2.20062900 | -2.71225500 |
| H | 1.56606400  | -0.72355000 | -1.50636500 |
| H | 1.77803200  | -0.25569700 | -3.18024800 |
| H | -4.46152300 | -3.69573600 | 2.49361300  |
| H | -5.74798700 | -2.56943300 | 2.04422200  |
| H | -5.92003900 | -4.29436400 | 1.69170400  |
| C | 1.30463000  | -3.80014400 | 1.99257300  |
| H | -0.13870800 | -2.32128300 | 2.61951200  |
| H | 1.38704200  | -1.63470100 | 2.07521100  |
| C | -2.99411300 | 3.50429900  | 0.76426700  |
| C | -4.19910100 | 1.65362100  | -0.22045800 |
| H | 2.56034800  | -2.61067200 | -3.72746900 |
| H | 2.42857200  | -3.02998400 | -2.01447800 |
| H | 3.60640500  | -1.81683500 | -2.54418600 |
| H | 2.08903000  | -3.93305700 | 1.23893400  |
| H | 1.75803000  | -3.94511200 | 2.97773800  |
| H | 0.56728800  | -4.59623900 | 1.84297800  |
| C | -4.16299900 | 3.93646400  | 1.37831900  |
| H | -2.06339000 | 4.04536400  | 0.90091400  |
| C | -5.36925000 | 2.09823400  | 0.38745700  |
| H | -4.21067900 | 0.76710700  | -0.84615200 |
| C | -5.35428000 | 3.23535400  | 1.19218500  |
| H | -4.14333500 | 4.82241200  | 2.00494000  |
| H | -6.29441500 | 1.55254100  | 0.23179200  |
| H | -6.26638100 | 3.57448600  | 1.67288700  |
| B | 2.56732200  | 1.78866900  | 1.00934600  |
| O | 2.55002600  | 0.43724100  | 1.23538100  |

---

|                       |            |             |             |
|-----------------------|------------|-------------|-------------|
| O                     | 3.79327700 | 2.26524000  | 0.64899600  |
| H                     | 1.61033400 | 2.47665100  | 1.15632400  |
| C                     | 3.93645000 | 0.00324000  | 1.25514900  |
| C                     | 4.02706400 | -1.39695300 | 0.67569000  |
| H                     | 5.07379200 | -1.67933300 | 0.52262600  |
| H                     | 3.58071400 | -2.11509100 | 1.36944100  |
| H                     | 3.50126200 | -1.46150700 | -0.27945400 |
| C                     | 4.37545500 | 0.00740800  | 2.71653400  |
| H                     | 5.39567800 | -0.37138000 | 2.82365400  |
| H                     | 4.32886600 | 1.01523100  | 3.14010500  |
| H                     | 3.70435500 | -0.63879800 | 3.28935200  |
| C                     | 4.63746800 | 1.10927100  | 0.40449900  |
| C                     | 4.58341300 | 0.82138400  | -1.09284400 |
| H                     | 3.56905800 | 0.55894100  | -1.40823000 |
| H                     | 4.88191500 | 1.72096200  | -1.63772700 |
| H                     | 5.26532100 | 0.00851900  | -1.35958100 |
| C                     | 6.05608500 | 1.43888800  | 0.83489800  |
| H                     | 6.08852000 | 1.80393400  | 1.86319800  |
| H                     | 6.69323600 | 0.55252300  | 0.75434100  |
| H                     | 6.46536800 | 2.21377000  | 0.18089500  |
| C                     | 0.63707500 | 2.38337100  | -1.55051400 |
| N                     | 1.72279100 | 2.41026000  | -1.98348900 |
| STS3 <sub>CN</sub> -2 |            |             |             |
| P                     | 2.06234200 | 0.65157500  | 0.06370200  |
| C                     | 1.96484100 | 0.87116100  | 1.89383800  |
| C                     | 3.28095800 | 1.95487900  | -0.45325200 |
| C                     | 1.00076600 | -0.10375700 | 2.57626000  |
| H                     | 2.97927200 | 0.75079300  | 2.29207200  |
| H                     | 1.65837200 | 1.90432200  | 2.10037500  |
| C                     | 0.39286400 | 1.16078100  | -0.53197300 |

---

|   |             |             |             |
|---|-------------|-------------|-------------|
| C | 0.97780000  | -2.25062000 | 0.02025800  |
| C | 2.99425300  | 3.43021900  | -0.13267200 |
| H | 4.21655400  | 1.62977300  | 0.01813900  |
| H | 3.42993100  | 1.83691000  | -1.53370200 |
| C | 0.71274900  | 0.27357800  | 4.02782600  |
| H | 1.41391600  | -1.11835000 | 2.53794800  |
| H | 0.04887500  | -0.14028100 | 2.02853800  |
| C | -0.32713300 | 2.27359100  | 0.23940800  |
| H | -0.23267600 | 0.25685000  | -0.53233800 |
| H | 0.52133800  | 1.43689800  | -1.58648100 |
| C | 2.07744300  | -1.73001300 | -0.27513800 |
| C | 2.18747000  | 4.13786200  | -1.22284700 |
| H | 2.48411900  | 3.52588300  | 0.83381700  |
| H | 3.95120100  | 3.95427800  | -0.01698600 |
| C | -0.23574800 | -0.71969200 | 4.69237400  |
| H | 0.27700100  | 1.28059600  | 4.05666900  |
| H | 1.65585200  | 0.32552800  | 4.58663400  |
| C | -1.53386700 | 2.80208600  | -0.53669100 |
| H | -0.65888300 | 1.88451900  | 1.21034100  |
| H | 0.35026300  | 3.10723000  | 0.45982600  |
| C | 3.44130800  | -2.08428600 | -0.66123100 |
| C | 1.75132400  | 5.53758200  | -0.80392500 |
| H | 1.30485400  | 3.54299900  | -1.48458400 |
| H | 2.79909300  | 4.19175600  | -2.13191600 |
| H | -1.18040200 | -0.78154000 | 4.14106500  |
| H | 0.20072200  | -1.72375400 | 4.71083600  |
| H | -0.46383300 | -0.43298300 | 5.72290800  |
| C | -2.40116600 | 3.73908100  | 0.29743900  |
| H | -2.13153200 | 1.95218800  | -0.88573700 |
| H | -1.17595600 | 3.32245200  | -1.43553000 |

---

|   |             |             |             |
|---|-------------|-------------|-------------|
| C | 3.95915500  | -3.29777900 | -0.18250800 |
| C | 4.22311100  | -1.29550600 | -1.51094000 |
| H | 2.61579800  | 6.15572600  | -0.53891500 |
| H | 1.09463900  | 5.49474200  | 0.07243600  |
| H | 1.20790000  | 6.04592200  | -1.60540300 |
| H | -1.82166400 | 4.59251900  | 0.66638500  |
| H | -3.24064800 | 4.13173000  | -0.28403400 |
| H | -2.81180900 | 3.21562000  | 1.16788100  |
| C | 5.24048300  | -3.70140100 | -0.53958200 |
| H | 3.34756900  | -3.91029000 | 0.47205900  |
| C | 5.49943700  | -1.71115700 | -1.87684000 |
| H | 3.82140400  | -0.36552000 | -1.89851100 |
| C | 6.01439700  | -2.90998600 | -1.38748600 |
| H | 5.63517300  | -4.63617900 | -0.15433100 |
| H | 6.09276100  | -1.09572300 | -2.54546600 |
| H | 7.01435400  | -3.22691500 | -1.66625900 |
| B | -3.08040000 | -0.24228600 | 0.48439900  |
| O | -2.88468400 | -0.38093700 | -0.86340900 |
| O | -4.32768300 | -0.61404300 | 0.89749800  |
| H | -2.27401700 | 0.23275900  | 1.21837900  |
| C | -4.17728000 | -0.68046700 | -1.44732300 |
| C | -3.98207300 | -1.65052900 | -2.59955700 |
| H | -4.94991400 | -1.96453100 | -3.00291500 |
| H | -3.42125700 | -1.15992900 | -3.39996700 |
| H | -3.42680200 | -2.53542000 | -2.28276700 |
| C | -4.74390500 | 0.64441200  | -1.95163500 |
| H | -5.70563300 | 0.50347300  | -2.45270100 |
| H | -4.87757900 | 1.35275400  | -1.12739100 |
| H | -4.04124300 | 1.07908300  | -2.66812100 |
| C | -4.97218800 | -1.26122000 | -0.23045300 |

---

|   |             |             |             |
|---|-------------|-------------|-------------|
| C | -4.77862900 | -2.76351900 | -0.05031300 |
| H | -3.71725600 | -3.02529700 | -0.05169000 |
| H | -5.20175400 | -3.05830200 | 0.91396200  |
| H | -5.28869900 | -3.32489800 | -0.83816400 |
| C | -6.45077000 | -0.91175500 | -0.21424200 |
| H | -6.60862000 | 0.16797900  | -0.18375000 |
| H | -6.94668900 | -1.31592700 | -1.10242000 |
| H | -6.92027400 | -1.35385200 | 0.66886600  |
| C | -0.30566200 | -2.36653100 | 0.47236200  |
| N | -1.38823400 | -2.51857500 | 0.88767800  |

SM1<sub>CN</sub>

|   |             |             |             |
|---|-------------|-------------|-------------|
| C | 0.71744000  | -0.20244800 | -0.36548700 |
| C | 0.07723300  | 0.96157200  | 0.31040200  |
| C | -0.59363800 | 1.92062600  | -0.46009500 |
| C | 0.09983800  | 1.10759200  | 1.70347100  |
| C | -1.22109600 | 3.00433700  | 0.14825300  |
| H | -0.61573700 | 1.81474600  | -1.54113800 |
| C | -0.53134500 | 2.19033500  | 2.31099500  |
| H | 0.59018300  | 0.35441600  | 2.31551400  |
| C | -1.18856700 | 3.14406600  | 1.53494000  |
| H | -1.73670800 | 3.73863600  | -0.46268400 |
| H | -0.51563900 | 2.28471000  | 3.39233300  |
| H | -1.67716200 | 3.98932700  | 2.00925500  |
| C | 0.16345700  | -1.06536300 | -1.24195400 |
| P | 2.47617200  | -0.56764400 | -0.07377900 |
| C | 3.30719300  | 0.69671400  | 0.93261900  |
| C | 3.37205600  | 2.06747800  | 0.24968500  |
| H | 4.31341900  | 0.31604900  | 1.14637700  |
| H | 2.77949700  | 0.76226600  | 1.88913900  |
| C | 3.87582400  | 3.14456800  | 1.20918400  |

---

|   |            |             |             |
|---|------------|-------------|-------------|
| H | 4.03282700 | 2.01204900  | -0.62443200 |
| H | 2.37949200 | 2.35434700  | -0.11996100 |
| C | 3.97080200 | 4.51131300  | 0.53954100  |
| H | 3.19457700 | 3.19743400  | 2.06748600  |
| H | 4.85657600 | 2.84941900  | 1.60220700  |
| H | 4.32749600 | 5.27265100  | 1.23859300  |
| H | 4.66119600 | 4.48531200  | -0.30978800 |
| H | 2.99233700 | 4.83002500  | 0.16571400  |
| C | 3.30397000 | -0.63804500 | -1.69030200 |
| C | 4.80894600 | -0.90327400 | -1.61339700 |
| H | 3.09433500 | 0.31703500  | -2.18662000 |
| H | 2.78390100 | -1.41692700 | -2.25786200 |
| C | 5.43429600 | -0.96319300 | -3.00737500 |
| H | 5.30075400 | -0.11319500 | -1.03153600 |
| H | 4.99750200 | -1.84936800 | -1.09148800 |
| C | 6.93550900 | -1.22685100 | -2.95333000 |
| H | 4.93759700 | -1.74897100 | -3.58886100 |
| H | 5.23958200 | -0.01775400 | -3.52792500 |
| H | 7.36751900 | -1.26766900 | -3.95691000 |
| H | 7.45251100 | -0.43796600 | -2.39727100 |
| H | 7.14816500 | -2.17955300 | -2.45753300 |
| C | 2.64394900 | -2.18169900 | 0.74209200  |
| C | 1.93444100 | -2.25230000 | 2.09628100  |
| H | 3.71619200 | -2.38386000 | 0.84532700  |
| H | 2.22627200 | -2.91585900 | 0.04350200  |
| C | 2.09405800 | -3.62691700 | 2.74519000  |
| H | 2.33499300 | -1.48343200 | 2.76993500  |
| H | 0.86727100 | -2.03660500 | 1.95900200  |
| C | 1.38149600 | -3.71205200 | 4.09093900  |
| H | 1.69846000 | -4.39031500 | 2.06468700  |

---

|                    |             |             |             |
|--------------------|-------------|-------------|-------------|
| H                  | 3.16172700  | -3.84294900 | 2.87340800  |
| H                  | 1.50238300  | -4.70049000 | 4.54245000  |
| H                  | 1.77917900  | -2.97160800 | 4.79272400  |
| H                  | 0.30919900  | -3.52321300 | 3.97762300  |
| C                  | -1.18977700 | -0.92197800 | -1.54415600 |
| N                  | -2.30968500 | -0.95074500 | -1.87007800 |
| B                  | -3.86682300 | -0.44586000 | -2.10312600 |
| O                  | -4.72203900 | -1.46500000 | -1.53811800 |
| O                  | -4.06680500 | 0.76200000  | -1.34612900 |
| H                  | -3.90820700 | -0.28155300 | -3.30973400 |
| C                  | -5.55725500 | -0.83566100 | -0.56954900 |
| C                  | -5.87247400 | -1.82792100 | 0.54181700  |
| H                  | -6.43356700 | -1.34617000 | 1.35005200  |
| H                  | -6.48408400 | -2.64454100 | 0.14539100  |
| H                  | -4.95931400 | -2.25975900 | 0.95708600  |
| C                  | -6.85294400 | -0.40283900 | -1.26155900 |
| H                  | -7.58051200 | 0.00924800  | -0.55487400 |
| H                  | -6.64454800 | 0.34885000  | -2.02908100 |
| H                  | -7.30028500 | -1.27468700 | -1.74806000 |
| C                  | -4.69994600 | 0.39014400  | -0.12465400 |
| C                  | -3.63845600 | 0.00307600  | 0.91230600  |
| H                  | -2.90773500 | 0.81483500  | 0.99001000  |
| H                  | -4.08426100 | -0.15681700 | 1.89972200  |
| H                  | -3.11040700 | -0.90853600 | 0.62032800  |
| C                  | -5.49886800 | 1.57992200  | 0.39000300  |
| H                  | -6.15748900 | 1.97767200  | -0.38516900 |
| H                  | -6.10407300 | 1.30201700  | 1.25972400  |
| H                  | -4.81217700 | 2.37669700  | 0.69499200  |
| STS4 <sub>CN</sub> |             |             |             |
| C                  | 0.78325600  | 0.36153600  | 0.11945700  |



---

|   |             |             |             |
|---|-------------|-------------|-------------|
| C | 0.53869800  | 1.72370600  | -0.40629100 |
| C | -0.76530200 | 2.08594500  | -0.80055100 |
| C | 1.54462000  | 2.69569200  | -0.53735100 |
| C | -1.03820200 | 3.35107300  | -1.30378200 |
| H | -1.57003900 | 1.36233100  | -0.70133200 |
| C | 1.26802500  | 3.96106800  | -1.05028300 |
| H | 2.55645900  | 2.48458100  | -0.21055000 |
| C | -0.02396700 | 4.30009400  | -1.44009700 |
| H | -2.05533300 | 3.59631100  | -1.59649300 |
| H | 2.07174300  | 4.68667600  | -1.13420900 |
| H | -0.23968900 | 5.28655100  | -1.83762300 |
| C | -0.24996000 | -0.46301700 | 0.43837100  |
| P | 2.40059300  | -0.35858300 | 0.35022500  |
| C | 3.59816300  | 0.06320400  | -0.95937700 |
| C | 3.05741800  | -0.19534400 | -2.36699800 |
| H | 4.48540200  | -0.54935800 | -0.75824100 |
| H | 3.90753200  | 1.10526000  | -0.84285300 |
| C | 4.10149600  | 0.11691700  | -3.43798700 |
| H | 2.74330900  | -1.24347400 | -2.45766000 |
| H | 2.16405800  | 0.41876400  | -2.53346900 |
| C | 3.57359300  | -0.13523600 | -4.84651000 |
| H | 4.41264200  | 1.16415100  | -3.33884500 |
| H | 4.99499800  | -0.49403100 | -3.25905800 |
| H | 4.33003700  | 0.09411700  | -5.60210500 |
| H | 3.27933800  | -1.18222400 | -4.97259900 |
| H | 2.69499700  | 0.48494300  | -5.05081100 |
| C | 2.19237100  | -2.17055300 | 0.32675000  |
| C | 3.49857900  | -2.96774900 | 0.29093300  |
| H | 1.56788700  | -2.40651300 | -0.54128900 |
| H | 1.60648400  | -2.42187600 | 1.21745300  |

---

|   |             |             |             |
|---|-------------|-------------|-------------|
| C | 3.23041000  | -4.46961400 | 0.39530400  |
| H | 4.03521100  | -2.76485800 | -0.64406700 |
| H | 4.15893600  | -2.66254900 | 1.11240200  |
| C | 4.51493000  | -5.28950100 | 0.33160600  |
| H | 2.70214600  | -4.67529800 | 1.33390200  |
| H | 2.55556400  | -4.76980200 | -0.41533700 |
| H | 4.30689000  | -6.36012300 | 0.40912900  |
| H | 5.04306100  | -5.11801700 | -0.61204900 |
| H | 5.19310700  | -5.01974800 | 1.14781300  |
| C | 3.16644000  | 0.03899500  | 1.95902800  |
| C | 3.36148800  | 1.53049200  | 2.23455200  |
| H | 4.12505300  | -0.49257300 | 1.99881400  |
| H | 2.50762800  | -0.40788400 | 2.71375700  |
| C | 3.97108700  | 1.77188400  | 3.61506900  |
| H | 4.01376400  | 1.96946600  | 1.46826600  |
| H | 2.39552200  | 2.04579100  | 2.16612600  |
| C | 4.17434100  | 3.25590300  | 3.90267800  |
| H | 3.31590900  | 1.33110100  | 4.37609900  |
| H | 4.93012200  | 1.24362900  | 3.68325900  |
| H | 4.60556700  | 3.41334900  | 4.89511500  |
| H | 4.84843400  | 3.70863200  | 3.16817000  |
| H | 3.22301800  | 3.79585700  | 3.85988300  |
| C | -1.30897900 | -1.07068300 | 0.72260500  |
| N | -2.36417900 | -1.78388400 | 0.86518900  |
| B | -3.65918100 | -1.32319600 | 0.34718700  |
| O | -4.86937000 | -1.80600000 | 0.87279300  |
| O | -3.83603300 | -0.06282200 | -0.26093100 |
| H | -2.97312800 | -2.25040200 | -0.45562400 |
| C | -5.90133600 | -1.03864900 | 0.23478000  |
| C | -7.10819500 | -0.97605500 | 1.15694200  |

---

|                    |             |             |             |
|--------------------|-------------|-------------|-------------|
| H                  | -7.87150000 | -0.30567500 | 0.74875500  |
| H                  | -7.54800500 | -1.97285600 | 1.25583900  |
| H                  | -6.82753300 | -0.62611200 | 2.15240100  |
| C                  | -6.26918500 | -1.73714000 | -1.07426400 |
| H                  | -7.10476500 | -1.24177500 | -1.57711400 |
| H                  | -5.41421900 | -1.76122300 | -1.75775800 |
| H                  | -6.55968800 | -2.76798500 | -0.85282900 |
| C                  | -5.19230500 | 0.33465000  | -0.00469000 |
| C                  | -5.18448400 | 1.20970100  | 1.24814400  |
| H                  | -4.48959600 | 2.04001100  | 1.09250400  |
| H                  | -6.17536500 | 1.62160100  | 1.46177400  |
| H                  | -4.84687800 | 0.63785500  | 2.11800500  |
| C                  | -5.71484900 | 1.12118900  | -1.19614500 |
| H                  | -5.58283800 | 0.56572800  | -2.12691000 |
| H                  | -6.77752800 | 1.35364600  | -1.07132600 |
| H                  | -5.16813100 | 2.06545000  | -1.28119400 |
| STS5 <sub>CN</sub> |             |             |             |
| C                  | -1.52833200 | -0.80842900 | -1.09251200 |
| C                  | -2.96473300 | -1.21628200 | -1.18735400 |
| C                  | -3.28322400 | -2.57884200 | -1.11124700 |
| C                  | -4.00142800 | -0.29827100 | -1.39301400 |
| C                  | -4.60200500 | -3.00888300 | -1.22111800 |
| H                  | -2.48006500 | -3.29558900 | -0.96763400 |
| C                  | -5.32151800 | -0.72806000 | -1.50724000 |
| H                  | -3.77440900 | 0.75856600  | -1.49503100 |
| C                  | -5.62691600 | -2.08408200 | -1.41526700 |
| H                  | -4.82941300 | -4.06839400 | -1.15520000 |
| H                  | -6.10977500 | -0.00090600 | -1.67664200 |
| H                  | -6.65591200 | -2.41888100 | -1.50037700 |
| C                  | -0.60314100 | -1.41383700 | -1.84958500 |

---

|   |             |             |             |
|---|-------------|-------------|-------------|
| P | -1.06739200 | 0.40079500  | 0.22048100  |
| C | -2.47107100 | 1.35365200  | 0.90456900  |
| C | -2.80530100 | 2.65045600  | 0.15931600  |
| H | -2.20230800 | 1.57407100  | 1.94467400  |
| H | -3.33472300 | 0.68157400  | 0.93747200  |
| C | -4.16037100 | 3.20539700  | 0.59502000  |
| H | -2.02126400 | 3.39265600  | 0.35435000  |
| H | -2.81290400 | 2.49134700  | -0.92631200 |
| C | -4.48804300 | 4.52891400  | -0.08779300 |
| H | -4.93611500 | 2.46335600  | 0.36615100  |
| H | -4.16366500 | 3.33449000  | 1.68431500  |
| H | -5.46439400 | 4.90731100  | 0.22681200  |
| H | -3.73909000 | 5.29010400  | 0.15339200  |
| H | -4.50741900 | 4.41287300  | -1.17630400 |
| C | 0.13654500  | 1.60254900  | -0.41952800 |
| C | 0.88858900  | 2.36317600  | 0.67418400  |
| H | -0.43569100 | 2.28725300  | -1.05598100 |
| H | 0.85296400  | 1.08703200  | -1.06047200 |
| C | 1.79255100  | 3.43006300  | 0.05862000  |
| H | 0.18544500  | 2.82738800  | 1.37910500  |
| H | 1.50350900  | 1.65761400  | 1.24833400  |
| C | 2.55362800  | 4.22808500  | 1.11177300  |
| H | 2.49131200  | 2.92844100  | -0.62144900 |
| H | 1.18297700  | 4.10836200  | -0.55155300 |
| H | 3.21838100  | 4.96310600  | 0.64906600  |
| H | 1.86400100  | 4.76737500  | 1.76978200  |
| H | 3.16602200  | 3.57180500  | 1.73888500  |
| C | -0.39325700 | -0.52362900 | 1.64239400  |
| C | -1.38853100 | -1.54593900 | 2.20104300  |
| H | -0.12225900 | 0.21770900  | 2.40433800  |

---

|   |             |             |             |
|---|-------------|-------------|-------------|
| H | 0.52295400  | -1.02259800 | 1.31296000  |
| C | -0.79224600 | -2.31175300 | 3.38175100  |
| H | -2.31070600 | -1.04416000 | 2.52066600  |
| H | -1.66784500 | -2.25438700 | 1.41143100  |
| C | -1.76193700 | -3.34650700 | 3.94316400  |
| H | 0.13261300  | -2.80384900 | 3.05687700  |
| H | -0.50955100 | -1.60004300 | 4.16710300  |
| H | -1.32148500 | -3.88843600 | 4.78451500  |
| H | -2.68282000 | -2.87025200 | 4.29516800  |
| H | -2.03668400 | -4.07954300 | 3.17791200  |
| C | 0.78036100  | -1.27658400 | -1.89690000 |
| N | 1.82087800  | -1.32438400 | -2.56750800 |
| B | 2.54148200  | -0.95044300 | -1.25214600 |
| O | 3.11364200  | 0.35699400  | -1.12336800 |
| O | 3.45315500  | -1.92606500 | -0.75890000 |
| H | 1.39647100  | -0.99032200 | -0.48599600 |
| C | 4.43690300  | 0.17990600  | -0.59956400 |
| C | 4.77123700  | 1.33355700  | 0.33392200  |
| H | 5.73019200  | 1.16165100  | 0.83480100  |
| H | 4.84919700  | 2.26603000  | -0.23465400 |
| H | 3.99658700  | 1.46024400  | 1.09450500  |
| C | 5.40657100  | 0.15676800  | -1.78113500 |
| H | 6.44935000  | 0.10730200  | -1.45260500 |
| H | 5.19996400  | -0.69909100 | -2.43070900 |
| H | 5.27128300  | 1.07176800  | -2.36486100 |
| C | 4.33901300  | -1.21187300 | 0.10675700  |
| C | 3.69799700  | -1.10766900 | 1.49320400  |
| H | 3.41659500  | -2.11098800 | 1.82753600  |
| H | 4.38652000  | -0.67791700 | 2.22696100  |
| H | 2.79471300  | -0.48896300 | 1.46361200  |

---

|                    |             |             |             |
|--------------------|-------------|-------------|-------------|
| C                  | 5.65322700  | -1.97224300 | 0.19586600  |
| H                  | 6.04293200  | -2.20027900 | -0.79835600 |
| H                  | 6.40235400  | -1.39256000 | 0.74528000  |
| H                  | 5.49770600  | -2.91656700 | 0.72638900  |
| STS6 <sub>CN</sub> |             |             |             |
| C                  | -0.60654100 | -0.40213000 | 0.09836800  |
| C                  | -0.74575700 | -1.88376000 | 0.10450600  |
| C                  | -0.20106500 | -2.63364300 | -0.94477300 |
| C                  | -1.40863900 | -2.54632100 | 1.14441300  |
| C                  | -0.33286500 | -4.01933200 | -0.95978100 |
| H                  | 0.31810500  | -2.12008600 | -1.74830100 |
| C                  | -1.54155900 | -3.93207800 | 1.12493000  |
| H                  | -1.79851500 | -1.97500200 | 1.98320100  |
| C                  | -1.00986900 | -4.67087000 | 0.06960200  |
| H                  | 0.09084600  | -4.58997100 | -1.78014500 |
| H                  | -2.05291600 | -4.43471000 | 1.93981600  |
| H                  | -1.11703400 | -5.75078700 | 0.05321400  |
| C                  | 0.57995100  | 0.19858100  | -0.04385300 |
| P                  | -2.06243400 | 0.67610800  | 0.21288800  |
| C                  | -3.60122700 | -0.29225200 | 0.22887500  |
| C                  | -3.87072300 | -1.03889800 | -1.08214400 |
| H                  | -4.40469800 | 0.42203100  | 0.44679500  |
| H                  | -3.55477500 | -0.98688600 | 1.07226500  |
| C                  | -5.06015300 | -1.98836700 | -0.94518600 |
| H                  | -4.06450500 | -0.31536100 | -1.88375200 |
| H                  | -2.98584300 | -1.61522400 | -1.37925100 |
| C                  | -5.34571700 | -2.73887600 | -2.24159400 |
| H                  | -4.84928200 | -2.70384200 | -0.14074900 |
| H                  | -5.94549100 | -1.41871200 | -0.63700900 |
| H                  | -6.19638600 | -3.41658400 | -2.12959400 |

---

|   |             |             |             |
|---|-------------|-------------|-------------|
| H | -5.57453500 | -2.04369800 | -3.05583400 |
| H | -4.47838000 | -3.33477500 | -2.54396500 |
| C | -2.10815800 | 1.76044900  | -1.24506400 |
| C | -3.34730900 | 2.65757800  | -1.31070600 |
| H | -2.04698200 | 1.10379400  | -2.12077800 |
| H | -1.18597400 | 2.34973500  | -1.21064200 |
| C | -3.31754500 | 3.54703500  | -2.55389300 |
| H | -4.25719600 | 2.04412200  | -1.32693000 |
| H | -3.40063000 | 3.28763700  | -0.41451900 |
| C | -4.54118000 | 4.45327200  | -2.64081200 |
| H | -2.40384000 | 4.15271700  | -2.53908800 |
| H | -3.25864300 | 2.91214300  | -3.44622100 |
| H | -4.50728000 | 5.08049400  | -3.53572600 |
| H | -5.46357200 | 3.86447600  | -2.67835600 |
| H | -4.60146200 | 5.11411000  | -1.77001200 |
| C | -1.97420200 | 1.67848100  | 1.72252800  |
| C | -1.92832000 | 0.84041800  | 3.00281100  |
| H | -2.84458700 | 2.34493300  | 1.71277200  |
| H | -1.07388000 | 2.29520100  | 1.62025200  |
| C | -1.84476700 | 1.72452400  | 4.24684700  |
| H | -2.82065700 | 0.20410900  | 3.06728400  |
| H | -1.05742200 | 0.17372800  | 2.97119400  |
| C | -1.79313100 | 0.90350300  | 5.53107600  |
| H | -0.95369300 | 2.35898400  | 4.17340500  |
| H | -2.70997500 | 2.39831600  | 4.26852300  |
| H | -1.73147700 | 1.54828100  | 6.41194400  |
| H | -2.68689700 | 0.27932400  | 5.63376700  |
| H | -0.92071600 | 0.24233000  | 5.53694500  |
| C | 1.08343100  | 1.51421800  | -0.08666800 |
| N | 2.29823100  | 1.73514400  | -0.17500200 |

---

|   |            |             |             |
|---|------------|-------------|-------------|
| B | 3.28779800 | 0.48433100  | -0.25579700 |
| O | 4.02170600 | 0.39103100  | -1.46480200 |
| O | 4.17346800 | 0.29904000  | 0.83472000  |
| H | 2.09708800 | -0.38588800 | -0.16264200 |
| C | 5.32925100 | -0.09341000 | -1.14524100 |
| C | 6.33228400 | 0.48355000  | -2.13376000 |
| H | 7.35625300 | 0.21697500  | -1.85051500 |
| H | 6.14079200 | 0.07935200  | -3.13254000 |
| H | 6.25419300 | 1.57147200  | -2.18678100 |
| C | 5.30641900 | -1.61956800 | -1.25088800 |
| H | 6.29861400 | -2.05503000 | -1.09692500 |
| H | 4.61619100 | -2.04628900 | -0.51668600 |
| H | 4.95852300 | -1.89779600 | -2.24995400 |
| C | 5.50851500 | 0.39397700  | 0.32422100  |
| C | 5.93442600 | 1.86141900  | 0.39903100  |
| H | 5.83521200 | 2.20434700  | 1.43298400  |
| H | 6.97374300 | 2.00206000  | 0.08628200  |
| H | 5.28992800 | 2.48307900  | -0.23031100 |
| C | 6.43217400 | -0.46520400 | 1.17411700  |
| H | 6.05571700 | -1.48689900 | 1.25818900  |
| H | 7.43997200 | -0.49514900 | 0.74610500  |
| H | 6.50423100 | -0.04469500 | 2.18183900  |



---

## Part 15: References

1. Frisch, M. J.; Trucks, G. W.; Schlegel, H. B.; Scuseria, G. E.; Robb, M. A.; Cheeseman, J. R.; Scalmani, G.; Barone, V.; Petersson, G. A.; Nakatsuji, H.; Li, X.; Caricato, M.; Marenich, A. V.; Bloino, J.; Janesko, B. G.; Gomperts, R.; Mennucci, B.; Hratchian, H. P.; Ortiz, J. V.; Izmaylov, A. F.; Sonnenberg, J. L.; Williams; Ding, F.; Lipparini, F.; Egidi, F.; Goings, J.; Peng, B.; Petrone, A.; Henderson, T.; Ranasinghe, D.; Zakrzewski, V. G.; Gao, J.; Rega, N.; Zheng, G.; Liang, W.; Hada, M.; Ehara, M.; Toyota, K.; Fukuda, R.; Hasegawa, J.; Ishida, M.; Nakajima, T.; Honda, Y.; Kitao, O.; Nakai, H.; Vreven, T.; Throssell, K.; Montgomery, J. A., Jr.; Peralta, J. E.; Ogliaro, F.; Bearpark, M. J.; Heyd, J. J.; Brothers, E. N.; Kudin, K. N.; Staroverov, V. N.; Keith, T. A.; Kobayashi, R.; Normand, J.; Raghavachari, K.; Rendell, A. P.; Burant, J. C.; Iyengar, S. S.; Tomasi, J.; Cossi, M.; Millam, J. M.; Klene, M.; Adamo, C.; Cammi, R.; Ochterski, J. W.; Martin, R. L.; Morokuma, K.; Farkas, O.; Foresman, J. B.; Fox, D. J. Gaussian 16; Rev. A.03: Wallingford, CT, 2016.
2. (a) Y. Zhao and D. G. Truhlar, Density Functionals with Broad Applicability in Chemistry, *Acc. Chem. Res.*, 2008, **41**, 157–167; (b) Y. Zhao and D. G. Truhlar, Exploring the Limit of Accuracy of the Global Hybrid Meta Density Functional for Main-Group Thermochemistry, Kinetics, and Noncovalent Interactions. *J. Chem. Theory Comput.* 2008, **4**, 1849–1868; (c) Y. Zhao and D. G. Truhlar, The M06 suite of density functionals for main group thermochemistry, thermochemical kinetics, noncovalent interactions, excited states, and transition elements: two new functionals and systematic testing of four M06-class functionals and 12 other functionals, *Theor. Chem. Acc.*, 2008, **120**, 215–241.
3. A. V. Marenich, C. J. Cramer and D. G. Truhlar, Universal Solvation Model Based on Solute Electron Density and on a Continuum Model of the Solvent Defined by the Bulk Dielectric Constant and Atomic Surface Tensions, *J. Phys. Chem. B.*, 2009, **113**, 6378–6396.
4. C.Y. Legault, CYLview, 1.0b. Universite' de Sherbrooke. <http://www.cylview.org>. 2009.
5. L. R. Domingo, P. Pérez and J. A. Sáez, Understanding the local reactivity in polar organic reactions through electrophilic and nucleophilic Parr functions, *RSC Adv.*, 2013, **3**, 1486–1494.
6. (a) R. G. Parr and R. G. Pearson, Absolute hardness: companion parameter to absolute electronegativity, *J. Am. Chem. Soc.*, 1983, **105**, 7512–7516; (b) L. R. Domingo, M. T. Picher and J. A. Sáez, Toward an Understanding of the Unexpected Regioselective Hetero-Diels–Alder

- 
- Reactions of Asymmetric Tetrazines with Electron-Rich Ethylenes: A DFT Study, *J. Org. Chem.*, 2009, **74**, 2726–2735.
7. (a) W. Kohn and L. Sham, Self-Consistent Equations Including Exchange and Correlation Effects, *Phys. Rev.*, 1965, **140**, A1133–A1138; (b) L. Sham and W. Kohn, One-Particle Properties of an Inhomogeneous Interacting Electron Gas, *Phys. Rev.*, 1966, **145**, 561–567.
  8. (a) L. R. Domingo and E. Chamorro, An Analysis of the Regioselectivity of 1,3-Dipolar Cycloaddition Reactions of Benzonitrile N-Oxides Based on Global and Local Electrophilicity and Nucleophilicity Indices, *Eur. J. Org. Chem.*, 2009, **18**, 3036–3044; (b) L. R. Domingo, E. Chamorro and P. Perez, An understanding of the electrophilic/nucleophilic behavior of electro-deficient 2,3-disubstituted 1,3-butadienes in polar diels-alder reactions. A density functional theory study, *J. Phys. Chem. A.*, 2008, **112**, 4046–4053.
  9. P. Pracht, F. Bohle and S. Grimme, Automated exploration of the low-energy chemical space with fast quantum chemical methods, *Phys. Chem. Chem. Phys.*, 2020, **22**, 7169–7192.
  10. C. Bannwarth, E. Caldeweyher, S. Ehlert, A. Hansen, P. Pracht, J. Seibert, S. Spicher, and S. Grimme, Extended tight-binding quantum chemistry methods, *Wires Comput. Mol. Sci.*, 2020, **11**, e1493.
  11. C. Bannwarth, S. Ehlert and S. Grimme, GFN2-xTB—An Accurate and Broadly Parametrized Self-Consistent Tight-Binding Quantum Chemical Method with Multipole Electrostatics and Density-Dependent Dispersion Contributions, *J. Chem. Theory Comput.*, 2019, **15**, 1652–1664.
  12. (a) A. D. Becke, Density-functional thermochemistry. III. The role of exact exchange, *J. Chem. Phys.*, 1993, **98**, 5648–5652; (b) C. Lee, W. Yang and R. G. Parr, Development of the colle-salveti correlation energy formula into a functional of the Electron density, *Phys. Rev. B.*, 1988, **37**, 785–789; (c) S. Grimme, J. Antony, S. Ehrlich and H. Krieg, A consistent and accurate ab initio parametrization of density functional dispersion correction (DFT-D) for the 94 elements H-Pu, *J. Chem. Phys.*, 2010, **132**, 154104.
  13. J.-D. Chai and M. Head-Gordon, Long-range corrected hybrid density functionals with damped atom–atom dispersion corrections, *Phys. Chem. Chem. Phys.*, 2008, **10**, 6615–6620.
